# Supplementary material for: Evaluation of Gremlin-1 as a therapeutic target in metabolic dysfunction-associated steatohepatitis
Source: eLife. 2024 Oct 3;13:RP95185. doi: 10.7554/eLife.95185 (PMC11449483; doi:10.7554/eLife.95185)
Supplement: Figure 1—figure supplement 1—source data 1. [file elife-95185-fig1-figsupp1-data1.xlsx]

## Sheet: Panel A
Sample_ID	sex	age	disease	stage	GREM1
ERR4873654	male	53	NAFLD	NAFLD	6.66731
ERR4873655	male	60	NAFLD	NAFLD	6.57562
ERR4873656	female	61	NAFLD	NAFLD	6.74714
ERR4873657	male	33	NAFLD	NAFLD	6.95416
ERR4873658	female	73	NAFLD	NAFLD	6.25437
ERR4873659	male	51	NAFLD	NAFLD	6.60738
ERR4873660	female	59	NAFLD	NAFLD	6.96083
ERR4873661	male	61	NAFLD	NAFLD	6.35653
ERR4873662	male	58	NAFLD	NAFLD	8.29882
ERR4873663	female	40	NAFLD	NAFLD	7.26922
ERR4873664	male	51	NAFLD	NAFLD	6.61585
ERR4873665	female	67	NAFLD	NAFLD	6.85009
ERR4873666	male	53	NAFLD	NAFLD	7.51469
ERR4873667	female	64	NAFLD	NAFLD	6.7969
ERR4873668	male	63	NAFLD	NAFLD	6.93001
ERR4873669	male	68	NAFLD	NAFLD	7.22852
ERR4873670	female	50	NAFLD	NAFLD	5.98322
ERR4873671	male	25	NAFLD	NAFLD	6.39315
ERR4873672	male	44	NAFLD	NAFLD	6.4332
ERR4873673	female	66	NASH	NASH_F0-2	6.64037
ERR4873674	male	52	NASH	NASH_F0-2	6.32735
ERR4873675	male	53	NASH	NASH_F0-2	6.86779
ERR4873676	male	68	NASH	NASH_F0-2	6.79703
ERR4873677	male	29	NASH	NASH_F0-2	7.02428
ERR4873678	female	66	NASH	NASH_F0-2	6.67023
ERR4873679	male	72	NASH	NASH_F0-2	7.09061
ERR4873680	female	44	NASH	NASH_F0-2	6.79672
ERR4873681	male	46	NASH	NASH_F0-2	6.86883
ERR4873682	female	57	NASH	NASH_F0-2	6.7132
ERR4873683	male	52	NASH	NASH_F0-2	6.75154
ERR4873684	female	47	NASH	NASH_F0-2	6.78244
ERR4873685	male	52	NASH	NASH_F0-2	6.45511
ERR4873686	female	44	NASH	NASH_F0-2	6.7255
ERR4873687	male	28	NASH	NASH_F0-2	7.34034
ERR4873688	male	73	NASH	NASH_F0-2	7.56462
ERR4873689	female	60	NASH	NASH_F0-2	6.5825
ERR4873690	female	59	NASH	NASH_F0-2	7.36754
ERR4873691	female	55	NASH	NASH_F0-2	6.05951
ERR4873692	male	60	NASH	NASH_F0-2	7.23327
ERR4873693	female	51	NASH	NASH_F0-2	6.33585
ERR4873694	male	48	NASH	NASH_F0-2	6.70923
ERR4873695	male	50	NASH	NASH_F0-2	6.70789
ERR4873696	male	61	NASH	NASH_F0-2	6.78873
ERR4873697	male	51	NASH	NASH_F3-4	6.71677
ERR4873698	female	64	NASH	NASH_F3-4	6.52821
ERR4873699	male	50	NASH	NASH_F3-4	6.71747
ERR4873700	male	62	NASH	NASH_F3-4	6.88243
ERR4873701	female	54	NASH	NASH_F3-4	6.40974
ERR4873702	male	62	NASH	NASH_F3-4	6.95977
ERR4873703	male	66	NASH	NASH_F3-4	6.78108
ERR4873704	male	42	NASH	NASH_F3-4	7.33557
ERR4873705	male	40	NASH	NASH_F3-4	6.4635
ERR4873706	male	63	NASH	NASH_F3-4	7.73998
ERR4873707	male	69	NASH	NASH_F0-2	7.32798
ERR4873708	male	66	NASH	NASH_F3-4	7.06566
ERR4873709	female	49	NASH	NASH_F3-4	6.46649
ERR4873710	female	48	NASH	NASH_F3-4	7.72075
ERR4873711	male	65	NASH	NASH_F3-4	6.30202

## Sheet: Panel B
Sample_ID	sex	age	steatosis	ballooning	fibrosis	inflammation	NAS	GREM1	fib_stage	NAS_group
SRR9036307	female	80	2	2	3	1	5	8.95388	F3/4	NAS > 4
SRR9036308	female	48	1	2	3	1	4	8.8325	F3/4	NAS 3-4
SRR9036309	female	65	2	2	3	1	5	8.43991	F3/4	NAS > 4
SRR9036310	female	53	2	2	3	1	5	8.31357	F3/4	NAS > 4
SRR9036311	female	61	2	2	3	2	6	11.1383	F3/4	NAS > 4
SRR9036312	female	46	2	2	3	2	6	8.66271	F3/4	NAS > 4
SRR9036313	female	56	3	1	3	1	5	10.3439	F3/4	NAS > 4
SRR9036314	female	55	3	2	3	1	6	9.54458	F3/4	NAS > 4
SRR9036315	female	60	1	2	3	1	4	8.09966	F3/4	NAS 3-4
SRR9036316	male	56	2	1	3	1	4	8.76339	F3/4	NAS 3-4
SRR9036317	female	64	1	1	3	2	4	8.63622	F3/4	NAS 3-4
SRR9036318	male	45	2	2	2	1	5	9.42886	F2	NAS > 4
SRR9036319	male	43	2	2	1	1	5	8.85253	F1	NAS > 4
SRR9036320	female	49	2	2	2	1	5	8.1441	F2	NAS > 4
SRR9036321	female	64	1	2	2	2	5	8.22084	F2	NAS > 4
SRR9036322	male	41	2	0	2	1	3	10.7846	F2	NAS 3-4
SRR9036323	female	36	2	1	2	1	4	8.89608	F2	NAS 3-4
SRR9036324	male	69	2	2	1	1	5	8.39728	F1	NAS > 4
SRR9036325	male	39	3	0	1	1	4	8.63175	F1	NAS 3-4
SRR9036326	female	55	1	1	2	1	3	8.46941	F2	NAS 3-4
SRR9036327	female	31	1	1	1	1	3	8.65867	F1	NAS 3-4
SRR9036328	female	65	1	1	2	1	3	8.33034	F2	NAS 3-4
SRR9036329	female	48	2	0	1	1	3	8.1343	F1	NAS 3-4
SRR9036330	female	53	0	0	2	2	2	8.49929	F2	NAS < 3
SRR9036331	male	50	1	0	1	1	2	9.67831	F1	NAS < 3
SRR9036332	female	52	3	1	2	1	5	8.84887	F2	NAS > 4
SRR9036333	female	64	1	2	3	1	4	8.38075	F3/4	NAS 3-4
SRR9036334	female	70	1	1	3	1	3	8.86347	F3/4	NAS 3-4
SRR9036335	male	41	1	0	4	2	3	8.27248	F3/4	NAS 3-4
SRR9036336	female	46	1	2	4	2	5	8.42851	F3/4	NAS > 4
SRR9036337	female	47	1	1	0	1	3	8.40819	F0	NAS 3-4
SRR9036338	male	65	2	1	1	2	5	8.47861	F1	NAS > 4
SRR9036339	male	49	1	1	0	1	3	8.39009	F0	NAS 3-4
SRR9036340	male	40	2	1	1	0	3	8.8181	F1	NAS 3-4
SRR9036341	male	61	0	1	0	0	1	8.75675	F0	NAS < 3
SRR9036342	female	53	3	2	1	1	6	8.59293	F1	NAS > 4
SRR9036343	male	31	3	0	0	1	4	8.55155	F0	NAS 3-4
SRR9036344	female	38	2	0	0	1	3	9.08101	F0	NAS 3-4
SRR9036345	female	59	2	0	0	1	3	8.45291	F0	NAS 3-4
SRR9036346	male	59	1	0	0	1	2	8.47827	F0	NAS < 3
SRR9036347	male	34	1	0	0	1	2	8.70029	F0	NAS < 3
SRR9036348	male	57	2	1	0	1	4	8.32	F0	NAS 3-4
SRR9036349	male	64	1	1	0	1	3	8.68761	F0	NAS 3-4
SRR9036350	female	43	1	0	0	1	2	8.38733	F0	NAS < 3
SRR9036351	female	41	1	1	0	2	4	8.09496	F0	NAS 3-4
SRR9036352	female	53	3	0	0	1	4	8.5328	F0	NAS 3-4
SRR9036353	male	37	3	0	0	2	5	8.96999	F0	NAS > 4
SRR9036354	male	32	2	0	0	1	3	8.76017	F0	NAS 3-4
SRR9036355	female	60	2	0	0	0	2	10.2246	F0	NAS < 3
SRR9036356	female	56	1	0	0	1	2	8.50258	F0	NAS < 3
SRR9036357	female	59	1	0	0	0	1	8.51325	F0	NAS < 3
SRR9036358	male	51	1	0	0	1	2	8.50131	F0	NAS < 3
SRR9036359	female	41	1	2	1	1	4	10.851	F1	NAS 3-4
SRR9036360	female	34	1	2	1	1	4	8.5914	F1	NAS 3-4
SRR9036361	male	44	1	2	1	1	4	8.66166	F1	NAS 3-4
SRR9036362	male	43	3	1	1	1	5	8.40664	F1	NAS > 4
SRR9036363	male	38	2	0	1	1	3	9.19409	F1	NAS 3-4
SRR9036364	male	52	1	2	1	1	4	8.41412	F1	NAS 3-4
SRR9036365	female	53	2	0	1	1	3	8.5578	F1	NAS 3-4
SRR9036366	male	52	1	0	1	1	2	9.17846	F1	NAS < 3
SRR9036367	female	55	2	2	1	1	5	8.78988	F1	NAS > 4
SRR9036368	male	21	2	2	1	1	5	8.76732	F1	NAS > 4
SRR9036369	female	41	1	0	1	0	1	8.50551	F1	NAS < 3
SRR9036370	male	57	3	1	1	1	5	8.73209	F1	NAS > 4
SRR9036371	female	57	3	1	1	2	6	8.89424	F1	NAS > 4
SRR9036372	female	45	2	1	1	1	4	8.69745	F1	NAS 3-4
SRR9036373	female	53	2	0	1	1	3	8.72136	F1	NAS 3-4
SRR9036374	male	44	3	2	1	1	6	8.88196	F1	NAS > 4
SRR9036375	female	68	0	0	0	1	1	8.71476	F0	NAS < 3
SRR9036376	male	19	0	0	0	1	1	8.84593	F0	NAS < 3
SRR9036377	female	64	0	0	0	0	0	10.1292	F0	NAS < 3
SRR9036378	male	26	0	0	0	0	0	9.09977	F0	NAS < 3
SRR9036379	female	60	0	0	0	0	0	8.29679	F0	NAS < 3
SRR9036380	female	77	3	1	3	2	6	8.50399	F3/4	NAS > 4
SRR9036381	female	55	3	2	1	1	6	8.78232	F1	NAS > 4
SRR9036382	female	54	2	2	1	1	5	8.76005	F1	NAS > 4
SRR9036383	female	35	1	1	1	1	3	8.91618	F1	NAS 3-4
SRR9036384	female	62	0	0	0	0	0	8.85047	F0	NAS < 3

## Sheet: Panel C
Sample_ID	fibrosis	NAS	disease	stage	GREM1	NAS_group
SRR9882956	2	4	NASH	NASH_F3-4	7.46786	NAS 3-4
SRR9882957	3	7	NASH	NASH_F0-2	5.43151	NAS > 6
SRR9882958	2	7	NASH	NASH_F3-4	6.43503	NAS > 6
SRR9882959	3	6	NASH	NASH_F0-2	7.30874	NAS 5-6
SRR9882960	0	5	NASH	NASH_F3-4	5.10408	NAS 5-6
SRR9882961	1	5	NASH	NASH_F3-4	7.82623	NAS 5-6
SRR9882962	3	6	NASH	NASH_F0-2	5.30134	NAS 5-6
SRR9882963	2	6	NASH	NASH_F3-4	5.3864	NAS 5-6
SRR9882964	0	2	NAFLD	NAFLD	4.90583	NAS < 3
SRR9882965	2	5	NASH	NASH_F3-4	4.68448	NAS 5-6
SRR9882966	1	1	NAFLD	NAFLD	5.21295	NAS < 3
SRR9882967	2	5	NASH	NASH_F3-4	8.41421	NAS 5-6
SRR9882968	3	8	NASH	NASH_F0-2	5.31983	NAS > 6
SRR9882969	2	5	NASH	NASH_F3-4	7.33735	NAS 5-6
SRR9882970	1	4	NASH	NASH_F3-4	8.40101	NAS 3-4
SRR9882971	2	3	NASH	NASH_F3-4	8.12122	NAS 3-4
SRR9882972	1	6	NASH	NASH_F3-4	5.29059	NAS 5-6
SRR9882973	2	5	NASH	NASH_F3-4	5.16125	NAS 5-6
SRR9882974	3	6	NASH	NASH_F0-2	5.41054	NAS 5-6
SRR9882975	2	3	NASH	NASH_F3-4	6.63132	NAS 3-4
SRR9882976	2	8	NASH	NASH_F3-4	5.15983	NAS > 6
SRR9882977	3	7	NASH	NASH_F0-2	5.86317	NAS > 6
SRR9882978	0	5	NAFLD	NAFLD	8.04165	NAS 5-6
SRR9882979	3	6	NASH	NASH_F0-2	7.50977	NAS 5-6
SRR9882980	4	6	NASH	NASH_F0-2	5.47057	NAS 5-6
SRR9882981	1	2	NAFLD	NAFLD	6.26347	NAS < 3
SRR9882982	3	5	NASH	NASH_F0-2	4.80881	NAS 5-6
SRR9882983	1	3	NAFLD	NAFLD	5.34732	NAS 3-4
SRR9882984	3	5	NASH	NASH_F0-2	7.3737	NAS 5-6
SRR9882985	1	4	NAFLD	NAFLD	7.62602	NAS 3-4
SRR9882986	1	2	NAFLD	NAFLD	5.34939	NAS < 3
SRR9882987	1	2	NAFLD	NAFLD	5.74693	NAS < 3
SRR9882988	2	5	NASH	NASH_F3-4	6.8119	NAS 5-6
SRR9882989	3	4	NASH	NASH_F0-2	4.88324	NAS 3-4
SRR9882990	4	8	NASH	NASH_F0-2	5.32276	NAS > 6
SRR9882991	0	5	NAFLD	NAFLD	6.89022	NAS 5-6
SRR9882992	3	4	NASH	NASH_F0-2	7.89819	NAS 3-4
SRR9882993	1	6	NASH	NASH_F3-4	5.53979	NAS 5-6
SRR9882994	1	3	NAFLD	NAFLD	5.70587	NAS 3-4
SRR9882995	0	6	NASH	NASH_F3-4	6.66419	NAS 5-6
SRR9882996	3	6	NASH	NASH_F0-2	6.48959	NAS 5-6
SRR9882997	4	5	NASH	NASH_F0-2	7.35908	NAS 5-6
SRR9882998	3	8	NASH	NASH_F0-2	7.95997	NAS > 6
SRR9882999	3	5	NASH	NASH_F0-2	6.81303	NAS 5-6
SRR9883000	2	5	NASH	NASH_F3-4	5.13097	NAS 5-6
SRR9883001	1	5	NASH	NASH_F3-4	8.76731	NAS 5-6
SRR9883002	0	4	NAFLD	NAFLD	5.54325	NAS 3-4
SRR9883003	4	6	NASH	NASH_F0-2	7.03338	NAS 5-6
SRR9883004	2	7	NASH	NASH_F3-4	5.17489	NAS > 6
SRR9883005	0	0	control	control	5.60281	NAS < 3
SRR9883006	0	0	control	control	4.94209	NAS < 3
SRR9883007	0	0	control	control	5.8202	NAS < 3
SRR9883008	0	2	NAFLD	NAFLD	5.2712	NAS < 3
SRR9883009	0	0	control	control	5.30607	NAS < 3
SRR9883010	0	0	control	control	6.48886	NAS < 3
SRR9883011	0	0	control	control	4.8935	NAS < 3
SRR9883012	0	0	control	control	5.63954	NAS < 3
SRR9883013	1	0	control	control	8.21125	NAS < 3
SRR9883014	3	6	NASH	NASH_F0-2	6.6193	NAS 5-6
SRR9883015	4	7	NASH	NASH_F0-2	5.3353	NAS > 6
SRR9883016	4	3	NASH	NASH_F0-2	5.64241	NAS 3-4
SRR9883017	1	7	NASH	NASH_F3-4	4.78818	NAS > 6
SRR9883018	3	5	NASH	NASH_F0-2	5.93707	NAS 5-6
SRR9883019	4	3	NASH	NASH_F0-2	5.24071	NAS 3-4
SRR9883020	1	3	NASH	NASH_F3-4	5.16771	NAS 3-4
SRR9883021	1	1	NAFLD	NAFLD	5.09393	NAS < 3
SRR9883022	3	4	NASH	NASH_F0-2	6.98213	NAS 3-4
SRR9883023	1	6	NASH	NASH_F3-4	4.41723	NAS 5-6
SRR9883024	2	4	NASH	NASH_F3-4	5.93204	NAS 3-4
SRR9883025	1	3	NAFLD	NAFLD	6.89597	NAS 3-4
SRR9883026	2	4	NASH	NASH_F3-4	7.28654	NAS 3-4
SRR9883027	2	4	NASH	NASH_F3-4	5.96102	NAS 3-4
SRR9883028	3	5	NASH	NASH_F0-2	6.16944	NAS 5-6
SRR9883029	2	4	NASH	NASH_F3-4	5.43043	NAS 3-4
SRR9883030	3	6	NASH	NASH_F0-2	5.77152	NAS 5-6
SRR9883031	4	5	NASH	NASH_F0-2	6.71636	NAS 5-6
SRR9883032	2	4	NASH	NASH_F3-4	5.58879	NAS 3-4
SRR9883033	0	3	NAFLD	NAFLD	7.85588	NAS 3-4
SRR9883034	2	4	NASH	NASH_F3-4	4.41723	NAS 3-4
SRR9883035	2	5	NASH	NASH_F3-4	5.39834	NAS 5-6
SRR9883036	0	4	NAFLD	NAFLD	6.28793	NAS 3-4
SRR9883037	2	7	NASH	NASH_F3-4	6.87643	NAS > 6
SRR9883038	0	2	NAFLD	NAFLD	5.02829	NAS < 3
SRR9883039	4	5	NASH	NASH_F0-2	7.69525	NAS 5-6
SRR9883040	3	5	NASH	NASH_F0-2	5.67218	NAS 5-6
SRR9883041	2	4	NASH	NASH_F3-4	6.81386	NAS 3-4
SRR9883042	3	8	NASH	NASH_F0-2	5.19461	NAS > 6
SRR9883043	0	4	NAFLD	NAFLD	5.43346	NAS 3-4
SRR9883044	1	5	NASH	NASH_F3-4	5.69604	NAS 5-6
SRR9883045	2	6	NASH	NASH_F3-4	6.74658	NAS 5-6
SRR9883046	2	7	NASH	NASH_F3-4	4.98055	NAS > 6
SRR9883047	4	2	NASH	NASH_F0-2	6.82088	NAS < 3
SRR9883048	2	6	NASH	NASH_F3-4	5.89991	NAS 5-6
SRR9883049	2	3	NASH	NASH_F3-4	6.5967	NAS 3-4
SRR9883050	3	7	NASH	NASH_F0-2	5.35706	NAS > 6
SRR9883051	3	4	NASH	NASH_F0-2	4.41723	NAS 3-4
SRR9883052	2	6	NASH	NASH_F3-4	7.65228	NAS 5-6
SRR9883053	2	6	NASH	NASH_F3-4	5.23938	NAS 5-6
SRR9883054	3	3	NASH	NASH_F0-2	5.62575	NAS 3-4
SRR9883055	0	3	NASH	NASH_F3-4	8.24981	NAS 3-4
SRR9883056	0	2	NAFLD	NAFLD	7.96449	NAS < 3
SRR9883057	3	5	NASH	NASH_F0-2	7.05846	NAS 5-6
SRR9883058	2	5	NASH	NASH_F3-4	7.8379	NAS 5-6
SRR9883059	0	4	NAFLD	NAFLD	7.63615	NAS 3-4
SRR9883060	1	6	NASH	NASH_F3-4	5.07704	NAS 5-6
SRR9883061	0	3	NAFLD	NAFLD	7.83222	NAS 3-4
SRR9883062	1	6	NASH	NASH_F3-4	6.18162	NAS 5-6
SRR9883063	3	6	NASH	NASH_F0-2	5.15406	NAS 5-6
SRR9883064	4	1	NASH	NASH_F0-2	5.06863	NAS < 3
SRR9883065	0	2	NAFLD	NAFLD	4.69941	NAS < 3
SRR9883066	2	4	NASH	NASH_F3-4	5.21445	NAS 3-4
SRR9883067	2	5	NASH	NASH_F3-4	7.12304	NAS 5-6
SRR9883068	1	2	NAFLD	NAFLD	7.83303	NAS < 3
SRR9883069	3	5	NASH	NASH_F0-2	4.88533	NAS 5-6
SRR9883070	0	1	NAFLD	NAFLD	5.44377	NAS < 3
SRR9883071	3	5	NASH	NASH_F0-2	6.33916	NAS 5-6
SRR9883072	1	2	NAFLD	NAFLD	5.24591	NAS < 3
SRR9883073	2	4	NASH	NASH_F3-4	4.96819	NAS 3-4
SRR9883074	4	4	NASH	NASH_F0-2	5.46945	NAS 3-4
SRR9883075	0	2	NAFLD	NAFLD	6.12359	NAS < 3
SRR9883076	2	4	NASH	NASH_F3-4	5.78561	NAS 3-4
SRR9883077	0	2	NAFLD	NAFLD	5.28213	NAS < 3
SRR9883078	0	3	NAFLD	NAFLD	7.99473	NAS 3-4
SRR9883079	0	4	NAFLD	NAFLD	5.12903	NAS 3-4
SRR9883080	1	6	NASH	NASH_F3-4	5.62032	NAS 5-6
SRR9883081	1	6	NASH	NASH_F3-4	5.38086	NAS 5-6
SRR9883082	0	3	NAFLD	NAFLD	7.09381	NAS 3-4
SRR9883083	1	2	NAFLD	NAFLD	7.33023	NAS < 3
SRR9883084	1	3	NAFLD	NAFLD	7.46012	NAS 3-4
SRR9883085	1	3	NASH	NASH_F3-4	7.18087	NAS 3-4
SRR9883086	2	5	NASH	NASH_F3-4	4.70225	NAS 5-6
SRR9883087	3	5	NASH	NASH_F0-2	5.76132	NAS 5-6
SRR9883088	2	4	NASH	NASH_F3-4	6.69343	NAS 3-4
SRR9883089	1	5	NASH	NASH_F3-4	8.30088	NAS 5-6
SRR9883090	3	4	NASH	NASH_F0-2	5.54315	NAS 3-4
SRR9883091	1	3	NAFLD	NAFLD	4.91998	NAS 3-4
SRR9883092	0	1	NAFLD	NAFLD	5.75372	NAS < 3
SRR9883093	0	2	NAFLD	NAFLD	5.45057	NAS < 3
SRR9883094	0	1	NAFLD	NAFLD	5.30896	NAS < 3
SRR9883095	1	3	NASH	NASH_F3-4	8.37094	NAS 3-4
SRR9883096	0	1	NAFLD	NAFLD	5.46695	NAS < 3
SRR9883097	3	7	NASH	NASH_F0-2	7.83145	NAS > 6
SRR9883098	3	5	NASH	NASH_F0-2	6.8384	NAS 5-6
SRR9883099	1	1	NAFLD	NAFLD	4.98467	NAS < 3
SRR9883100	1	3	NASH	NASH_F3-4	8.88438	NAS 3-4
SRR9883101	2	6	NASH	NASH_F3-4	5.08799	NAS 5-6
SRR9883102	2	7	NASH	NASH_F3-4	5.1356	NAS > 6
SRR9883103	3	8	NASH	NASH_F0-2	7.31837	NAS > 6
SRR9883104	1	5	NASH	NASH_F3-4	8.16895	NAS 5-6
SRR9883105	1	4	NASH	NASH_F3-4	5.31922	NAS 3-4
SRR9883106	1	5	NASH	NASH_F3-4	5.36441	NAS 5-6
SRR9883107	2	6	NASH	NASH_F3-4	6.95229	NAS 5-6
SRR9883108	3	4	NASH	NASH_F0-2	7.26002	NAS 3-4
SRR9883109	1	6	NASH	NASH_F3-4	4.87995	NAS 5-6
SRR9883110	0	4	NASH	NASH_F3-4	5.84206	NAS 3-4
SRR9883111	3	5	NASH	NASH_F0-2	6.58644	NAS 5-6
SRR9883112	0	4	NAFLD	NAFLD	5.10826	NAS 3-4
SRR9883113	3	7	NASH	NASH_F0-2	5.81824	NAS > 6
SRR9883114	0	4	NAFLD	NAFLD	5.20405	NAS 3-4
SRR9883115	0	2	NAFLD	NAFLD	5.27379	NAS < 3
SRR9883116	3	7	NASH	NASH_F0-2	7.10116	NAS > 6
SRR9883117	3	6	NASH	NASH_F0-2	5.88398	NAS 5-6
SRR9883118	3	7	NASH	NASH_F0-2	6.07612	NAS > 6
SRR9883119	3	4	NASH	NASH_F0-2	7.72387	NAS 3-4
SRR9883120	1	3	NASH	NASH_F3-4	5.27836	NAS 3-4
SRR9883121	4	8	NASH	NASH_F0-2	6.27383	NAS > 6
SRR9883122	3	5	NASH	NASH_F0-2	5.22469	NAS 5-6
SRR9883123	3	3	NASH	NASH_F0-2	5.27304	NAS 3-4
SRR9883124	2	4	NASH	NASH_F3-4	5.15455	NAS 3-4
SRR9883125	0	2	NAFLD	NAFLD	4.9479	NAS < 3
SRR9883126	2	5	NASH	NASH_F3-4	4.93104	NAS 5-6
SRR9883127	3	4	NASH	NASH_F0-2	7.26818	NAS 3-4
SRR9883128	0	4	NASH	NASH_F3-4	5.56742	NAS 3-4
SRR9883129	3	3	NASH	NASH_F0-2	4.96973	NAS 3-4
SRR9883130	2	0	control	control	4.98481	NAS < 3
SRR9883131	0	0	control	control	4.82796	NAS < 3
SRR9883132	2	5	NASH	NASH_F3-4	4.41723	NAS 5-6
SRR9883133	1	1	NAFLD	NAFLD	5.15582	NAS < 3
SRR9883134	0	2	NAFLD	NAFLD	4.882	NAS < 3
SRR9883135	0	2	NAFLD	NAFLD	4.76194	NAS < 3
SRR9883136	2	6	NASH	NASH_F3-4	4.83952	NAS 5-6
SRR9883137	2	6	NASH	NASH_F3-4	6.49951	NAS 5-6
SRR9883138	0	1	NAFLD	NAFLD	5.60463	NAS < 3
SRR9883139	2	6	NASH	NASH_F3-4	6.05907	NAS 5-6
SRR9883140	1	4	NASH	NASH_F3-4	6.97203	NAS 3-4
SRR9883141	1	3	NAFLD	NAFLD	4.8512	NAS 3-4
SRR9883142	0	2	NAFLD	NAFLD	4.96448	NAS < 3
SRR9883143	3	6	NASH	NASH_F0-2	5.45743	NAS 5-6
SRR9883144	2	7	NASH	NASH_F3-4	5.4682	NAS > 6
SRR9883145	2	5	NASH	NASH_F3-4	5.01105	NAS 5-6
SRR9883146	1	6	NASH	NASH_F3-4	7.71059	NAS 5-6
SRR9883147	1	5	NASH	NASH_F3-4	7.1901	NAS 5-6
SRR9883148	4	5	NASH	NASH_F0-2	5.7767	NAS 5-6
SRR9883149	2	5	NASH	NASH_F3-4	4.96539	NAS 5-6
SRR9883150	0	1	NAFLD	NAFLD	5.33774	NAS < 3
SRR9883151	2	8	NASH	NASH_F3-4	5.82606	NAS > 6
SRR9883152	1	5	NASH	NASH_F3-4	4.96951	NAS 5-6
SRR9883153	3	6	NASH	NASH_F0-2	7.61902	NAS 5-6
SRR9883154	3	3	NASH	NASH_F0-2	5.43867	NAS 3-4
SRR9883155	0	2	NAFLD	NAFLD	4.61426	NAS < 3
SRR9883156	1	5	NASH	NASH_F3-4	4.87875	NAS 5-6
SRR9883157	2	5	NASH	NASH_F3-4	4.60997	NAS 5-6
SRR9883158	3	6	NASH	NASH_F0-2	4.41723	NAS 5-6
SRR9883159	2	4	NASH	NASH_F3-4	4.81348	NAS 3-4
SRR9883160	2	6	NASH	NASH_F3-4	5.34137	NAS 5-6
SRR9883161	3	4	NASH	NASH_F0-2	5.30613	NAS 3-4
SRR9883162	3	5	NASH	NASH_F0-2	5.93357	NAS 5-6
SRR9883163	3	5	NASH	NASH_F0-2	5.19316	NAS 5-6
SRR9883164	1	6	NASH	NASH_F3-4	5.0212	NAS 5-6
SRR9883165	2	7	NASH	NASH_F3-4	5.7514	NAS > 6
SRR9883166	1	4	NAFLD	NAFLD	4.96764	NAS 3-4
SRR9883167	3	6	NASH	NASH_F0-2	7.04126	NAS 5-6
SRR9883168	3	7	NASH	NASH_F0-2	5.41375	NAS > 6
SRR9883169	1	3	NASH	NASH_F3-4	5.59496	NAS 3-4
SRR9883170	2	5	NASH	NASH_F3-4	5.62404	NAS 5-6
SRR9883171	3	7	NASH	NASH_F0-2	6.78276	NAS > 6
