# Supplementary material for: Evaluation of Gremlin-1 as a therapeutic target in metabolic dysfunction-associated steatohepatitis
Source: eLife. 2024 Oct 3;13:RP95185. doi: 10.7554/eLife.95185 (PMC11449483; doi:10.7554/eLife.95185)
Supplement: Figure 1—figure supplement 2—source data 1. [file elife-95185-fig1-figsupp2-data1.xlsx]

## Sheet: Tabelle1
	UMAP1	UMAP2	experiment	cell_type	GREM1	THY1	COL3A1	RGS5
1	1.20634	4.93528	GSE136103	Cholangiocytes	0	0	0	0
6	9.0888	4.28671	GSE136103	Resident NK	0	0	0	0
36	7.66868	4.17394	GSE136103	Resident NK	0	0	0	0
49	6.9696	5.20871	GSE136103	Resident NK	0	0	0	0
72	5.26481	5.47758	GSE136103	Resident NK	0	0	0	0
73	8.19	4.32305	GSE136103	Resident NK	0	0	0	0
97	4.29458	-5.03498	GSE136103	T cells	0	0	0	0
109	0.295915	5.7219	GSE136103	Cholangiocytes	0	0	0	0
116	2.67534	-6.33155	GSE136103	T cells	0	0	0	0
161	-0.710537	-4.7493	GSE136103	T cells	0	0	0	0
163	-7.31012	3.58073	GSE136103	MP	0	0	0	0
164	1.82626	-4.15687	GSE136103	T cells	0	0	0	0
166	-2.40028	-2.38674	GSE136103	T cells	0	0	0	0
176	7.34955	4.69563	GSE136103	Resident NK	0	0	0	0
187	3.91265	-6.24154	GSE136103	T cells	0	0	0	0
208	5.91581	5.45714	GSE136103	Resident NK	0	0	0	0
217	-6.64436	4.5941	GSE136103	MP	2.08163	0	0	0
246	0.159538	6.69521	GSE136103	Cholangiocytes	0	0	0	0
259	-1.81502	9.54565	GSE136103	Mesenchyme	0	0	0	0
267	-6.50214	4.65766	GSE136103	MP	0	0	0	0
269	-6.68417	-0.151381	GSE136103	Mast cell	0	0	0	0
323	-0.847325	-7.39036	GSE136103	T cells	0	0	0	0
326	3.01709	-5.81272	GSE136103	T cells	0	0	0	0
328	-2.71312	-1.11018	GSE136103	T cells	0	0	0	0
350	3.00121	-6.80625	GSE136103	T cells	0	0	0	0
367	-0.950586	-4.87382	GSE136103	T cells	0	0	0	0
378	-12.588	3.71608	GSE136103	MP	0	0	0	0
404	-2.739	-1.23199	GSE136103	T cells	0	0	0	0
417	8.69245	4.78411	GSE136103	Resident NK	0	0	0	0
427	0.220749	-4.03395	GSE136103	Neutrophils	0	0	0	3.40822
430	-1.75844	-8.19117	GSE136103	T cells	0	0	0	0
434	-0.823671	-14.2631	GSE136103	B cells	0	0	0	1.96185
468	1.69224	-6.25323	GSE136103	T cells	0	0	0	0
480	-1.87424	9.65441	GSE136103	Mesenchyme	0	0	0	0
486	0.141214	6.75977	GSE136103	Cholangiocytes	0	0	0	0
505	-1.85778	-6.37411	GSE136103	T cells	0	0	0	0
515	7.04872	-2.77263	GSE136103	T cells	0	0	0	0
516	-0.124869	6.16156	GSE136103	Cholangiocytes	0	0	0	0
530	-1.6241	-5.13596	GSE136103	T cells	0	0	0	0
541	2.31333	-3.40156	GSE136103	T cells	0	0	0	0
565	1.96642	-6.11752	GSE136103	T cells	0	0	0	0
576	6.50504	5.95651	GSE136103	Resident NK	0	0	0	0
625	-0.12225	4.93517	GSE136103	Cholangiocytes	0	0	0	0
631	1.59962	4.40061	GSE136103	Cholangiocytes	0	0	0	0
635	-1.81501	-4.12256	GSE136103	T cells	0	0	0	0
654	-2.14872	-6.17083	GSE136103	T cells	0	0	0	0
655	10.4123	-5.33808	GSE136103	Circulating NK/NKT	0	0	0	0
661	-2.9209	-4.26507	GSE136103	T cells	0	0	0	0
670	-0.348204	-6.55095	GSE136103	T cells	0	0	0	0
677	-0.182152	4.03124	GSE136103	Cholangiocytes	0	0	0	0
678	5.40525	5.41099	GSE136103	Resident NK	0	0	0	0
724	-8.40865	3.18479	GSE136103	MP	0	0	0	0
730	-5.80893	-2.89913	GSE136103	T cells	0	0	0	0
746	0.482606	-6.23887	GSE136103	T cells	0	0	0	0
769	7.80563	-3.83249	GSE136103	T cells	0	0	0	0
814	0.42961	-14.2555	GSE136103	B cells	0	0	0	0
828	-0.712677	10.207	GSE136103	Mesenchyme	0	0	0	1.42854
829	8.07109	5.32017	GSE136103	Resident NK	0	0	0	0
845	3.1799	-5.3264	GSE136103	T cells	0	0	0	0
866	-2.57137	-2.0669	GSE136103	T cells	0	0	0	0
887	2.18512	11.469	GSE136103	Endothelial cells	0	0	0	0
895	-0.400419	9.30333	GSE136103	Mesenchyme	0	0	0	0
908	2.96988	-4.95025	GSE136103	T cells	0	0	0	0
924	-0.142103	-14.4782	GSE136103	B cells	0	0	0	0
925	-11.9318	4.25702	GSE136103	MP	0	0	0	0
930	7.2117	-2.70392	GSE136103	T cells	2.28743	0	0	0
938	3.50147	-5.62129	GSE136103	T cells	2.74854	0	0	0
943	-2.94065	-2.19169	GSE136103	T cells	0	0	0	0
966	6.28638	5.12936	GSE136103	Resident NK	0	0	0	0
986	9.15034	4.15555	GSE136103	Resident NK	0	0	0	0
1003	1.64481	-4.05609	GSE136103	T cells	0	0	0	0
1018	-4.23213	-3.1714	GSE136103	T cells	0	0	0	0
1024	7.60403	4.555	GSE136103	Resident NK	0	0	0	0
1032	-7.2332	-0.510842	GSE136103	Mast cell	0	0	0	0
1037	-0.730437	-3.67363	GSE136103	T cells	0	0	0	0
1055	-1.41884	-14.1756	GSE136103	B cells	0	0	0	0
1065	-12.6942	3.75492	GSE136103	MP	0	0	0	0
1069	7.135	5.9009	GSE136103	Resident NK	0	0	0	0
1077	0.392016	5.83055	GSE136103	Cholangiocytes	0.965972	0	0	0
1082	-1.53117	-3.06304	GSE136103	Neutrophils	2.33321	0	0	3.36498
1087	-2.95682	-4.21057	GSE136103	T cells	0	0	0	0
1101	7.5165	5.55385	GSE136103	Resident NK	0	0	0	0
1103	-2.06677	-4.13715	GSE136103	T cells	0	0	0	1.87049
1113	-1.66284	-6.44528	GSE136103	T cells	0	0	0	0
1123	10.8353	-6.28971	GSE136103	Circulating NK/NKT	0	0	0	0
1134	11.6405	-6.40752	GSE136103	Circulating NK/NKT	0	0	0	0
1141	7.00231	5.96452	GSE136103	Resident NK	0	0	0	0
1153	8.75598	5.04333	GSE136103	Resident NK	0	0	0	0
1159	3.65598	-6.88229	GSE136103	T cells	0	0	0	0
1165	0.136528	3.70555	GSE136103	Neutrophils	0	0	0	0
1209	-3.75188	-1.89458	GSE136103	T cells	0	0	0	0
1216	-1.9816	-6.17676	GSE136103	T cells	0	0	0	0
1225	7.01546	-2.64702	GSE136103	T cells	0	0	0	0
1229	8.7026	4.20451	GSE136103	Resident NK	0	0	0	0
1248	-0.269625	9.27026	GSE136103	Mesenchyme	0	0	0	3.88335
1269	7.55613	5.0719	GSE136103	Resident NK	0	0	0	0
1295	2.00483	-4.90078	GSE136103	T cells	2.17548	0	0	0
1313	10.4708	-4.47955	GSE136103	Circulating NK/NKT	0	0	0	0
1334	-8.54526	2.76538	GSE136103	MP	0	0	0	0
1344	-3.23678	-2.75721	GSE136103	T cells	0	0	0	0
1352	1.24839	4.821	GSE136103	Cholangiocytes	0	0	0	0
1384	5.19442	-3.84456	GSE136103	T cells	0	0	0	0
1416	10.7736	-6.49101	GSE136103	Circulating NK/NKT	0	0	0	0
1434	-0.0773577	-6.82925	GSE136103	T cells	0	0	0	0
1438	-1.57836	9.85073	GSE136103	Mesenchyme	0	0	0	0
1449	-1.05437	10.0664	GSE136103	Mesenchyme	0	0	0	1.71298
1450	0.154559	4.88727	GSE136103	Cholangiocytes	0	0	0	2.20724
1452	-1.81222	9.65531	GSE136103	Mesenchyme	0	0	0	0
1473	2.51513	-5.15546	GSE136103	T cells	0	0	0	0
1480	-8.87069	-9.98737	GSE136103	Plasma cells	0	0	0	1.60085
1510	0.0989141	-5.17075	GSE136103	Neutrophils	0	0	0	0
1518	7.51702	4.79425	GSE136103	Resident NK	0	0	0	0
1519	-0.000527649	-6.39649	GSE136103	T cells	0	0	0	0
1531	10.3527	-6.46389	GSE136103	Circulating NK/NKT	0	0	0	2.22251
1565	-7.77136	11.7922	GSE136103	MP	0	0	0	0
1596	0.494451	5.73469	GSE136103	Cholangiocytes	0	0	0	0
1597	-1.69275	9.79621	GSE136103	Mesenchyme	0	0	0	1.3529
1615	1.60111	4.14343	GSE136103	Cholangiocytes	0	0	0	0
1624	-2.71034	-4.75135	GSE136103	T cells	0	0	0	0
1634	8.74183	5.08529	GSE136103	Resident NK	0	0	0	0
1642	-0.708938	5.52619	GSE136103	Cholangiocytes	0	0	0	0
1648	0.195764	5.24624	GSE136103	Cholangiocytes	0	0	0	0
1691	-6.44017	4.09035	GSE136103	MP	0	0	0	0
1707	-14.957	2.38423	GSE136103	Neutrophils	0	0	0	0
1723	-2.13069	-1.38015	GSE136103	T cells	0	0	0	0
1730	-5.05489	5.13781	GSE136103	MP	0	0	0	0
1734	7.57113	5.23131	GSE136103	Resident NK	0	0	0	0
1751	4.87783	4.94063	GSE136103	Resident NK	0	0	0	0
1768	5.95102	5.87518	GSE136103	Resident NK	0	0	0	0
1783	0.496989	4.66847	GSE136103	Cholangiocytes	0	0	0	0
1785	-2.84918	-2.82564	GSE136103	T cells	0	0	0	2.20222
1806	9.89277	-6.25439	GSE136103	Circulating NK/NKT	0	0	0	0
1846	6.94	5.75403	GSE136103	Resident NK	0	0	0	0
1850	8.51207	4.69206	GSE136103	Resident NK	0	0	0	0
1853	5.89326	5.25075	GSE136103	Resident NK	0	0	0	0
1863	0.735764	4.50405	GSE136103	Cholangiocytes	0	0	0	1.92445
1878	-3.194	-2.07184	GSE136103	T cells	0	0	0	0
1891	-4.6649	5.19191	GSE136103	MP	0	0	0	0
1894	1.60715	11.6805	GSE136103	Endothelial cells	0	0	0	0
1898	-0.474641	5.819	GSE136103	Cholangiocytes	0	0	0	0
1914	-1.19557	-2.6781	GSE136103	Neutrophils	0	0	0	0
1935	-2.74025	-2.14895	GSE136103	T cells	0	2.02652	0	2.02652
1937	8.03183	3.93397	GSE136103	Resident NK	0	0	0	0
1938	9.05137	3.65694	GSE136103	Resident NK	0	0	0	0
1972	2.74343	-5.84423	GSE136103	T cells	0	0	0	0
1973	-0.199247	-14.3719	GSE136103	B cells	0	0	0	0
1980	2.58282	-6.46746	GSE136103	T cells	0	0	0	0
1991	8.5853	4.34699	GSE136103	Resident NK	0	0	0	0
2005	8.44903	6.15456	GSE136103	Resident NK	0	0	0	0
2011	11.437	-6.20628	GSE136103	Circulating NK/NKT	0	0	0	0
2012	0.840209	5.08295	GSE136103	Cholangiocytes	0	0	0	0
2053	7.71015	5.12545	GSE136103	Resident NK	0	0	0	0
2075	-5.40685	-3.40693	GSE136103	T cells	0	0	0	0
2087	-0.318626	9.29458	GSE136103	Mesenchyme	0	0	0	3.21123
2105	-5.5614	-2.43004	GSE136103	T cells	0	0	0	0
2114	1.88901	11.2468	GSE136103	Endothelial cells	0	0	0	2.09464
2138	-4.13802	-2.72022	GSE136103	T cells	0	0	0	0
2153	11.4227	-6.06816	GSE136103	Circulating NK/NKT	0	0	0	0
2186	1.45741	3.55888	GSE136103	Cholangiocytes	0	0	0	0
2194	9.07442	4.72424	GSE136103	Resident NK	0	0	0	0
2209	-0.726417	-8.02411	GSE136103	T cells	0	0	0	0
2219	-0.575076	5.51998	GSE136103	Cholangiocytes	0	0	0	0
2241	0.369551	-14.5586	GSE136103	B cells	0	0	0	0
2269	-0.504256	9.83083	GSE136103	Mesenchyme	0	0	0	4.43478
2308	11.306	-6.85098	GSE136103	Circulating NK/NKT	0	0	0	0
2327	-1.75772	9.69459	GSE136103	Mesenchyme	0	0	0	2.17756
2332	0.376262	6.83277	GSE136103	Cholangiocytes	0	0	0	1.37566
2334	0.428729	5.70003	GSE136103	Cholangiocytes	0	0	0	2.85919
2352	-5.20867	5.48416	GSE136103	MP	0	0	0	0
2358	-12.4575	3.54454	GSE136103	MP	0.894508	0	0	0
2359	-0.912496	-3.02691	GSE136103	Neutrophils	0	0	0	3.54044
2381	0.12017	3.83162	GSE136103	Cholangiocytes	0	0	0	0
2385	11.6192	-5.93697	GSE136103	Circulating NK/NKT	0	0	0	0
2397	2.49291	-5.97575	GSE136103	T cells	0	0	0	0
2409	0.351458	-14.3333	GSE136103	B cells	0	0	0	0
2415	-0.0660308	5.45638	GSE136103	Cholangiocytes	0	0	0	0
2424	-2.89161	-1.70754	GSE136103	T cells	0	0	0	0
2426	-0.723555	-3.40182	GSE136103	T cells	0	0	0	0
2446	1.4284	8.48036	GSE136103	Mesenchyme	0	2.77072	0	0
2450	-0.136999	6.00232	GSE136103	Cholangiocytes	0	0	0	0
2458	8.90326	4.57836	GSE136103	Resident NK	0	0	0	0
2476	8.67545	4.29623	GSE136103	Resident NK	0	0	0	0
2550	7.96739	4.26831	GSE136103	Resident NK	0	0	0	0
2568	7.822	5.54682	GSE136103	Resident NK	0	0	0	0
2576	-1.16198	-4.96105	GSE136103	T cells	0	0	0	0
2592	9.44116	3.7279	GSE136103	Resident NK	0	0	0	0
2601	9.02048	4.99807	GSE136103	Resident NK	0	0	0	0
2604	-0.278678	5.465	GSE136103	Cholangiocytes	0	0	0	0
2618	-1.53765	9.94498	GSE136103	Mesenchyme	0	0	1.57849	0
2631	-10.7446	6.61883	GSE136103	MP	0	0	0	0
2636	-4.25475	5.61714	GSE136103	MP	0	0	0	0
2646	7.44372	5.84312	GSE136103	Resident NK	0	0	0	0
2650	7.34649	4.72094	GSE136103	Resident NK	0	0	0	0
2652	-0.256444	-14.4694	GSE136103	B cells	0	0	0	0
2654	1.41147	-4.29973	GSE136103	T cells	0	0	0	0
2661	-1.42165	9.92735	GSE136103	Mesenchyme	0	0	0	1.71186
2686	10.8594	-5.82078	GSE136103	Circulating NK/NKT	0	0	0	0
2689	0.500707	5.00043	GSE136103	Cholangiocytes	0	0	0	0
2703	0.071957	-6.47643	GSE136103	T cells	0	0	0	0
2704	-3.07029	-7.33958	GSE136103	T cells	0	0	0	2.03804
2726	-12.474	2.90153	GSE136103	MP	0	0	0	0
2732	-1.77179	9.73392	GSE136103	Mesenchyme	0	0	0	0
2760	-1.39159	-4.72486	GSE136103	T cells	0	0	0	0
2766	-1.39759	10.0143	GSE136103	Mesenchyme	0	0	0	2.66798
2779	3.62127	-6.7891	GSE136103	T cells	0	0	0	0
2780	-2.6755	-4.58386	GSE136103	T cells	0	0	0	0
2829	-0.404391	5.2678	GSE136103	Cholangiocytes	2.08904	0	0	0
2846	3.62681	-6.98524	GSE136103	T cells	0	0	0	0
2862	-3.33934	-3.20826	GSE136103	T cells	0	0	0	2.5402
2881	-2.93777	-4.96035	GSE136103	T cells	0	1.90327	0	0
2882	4.01545	-4.75766	GSE136103	T cells	0	0	0	0
2905	5.85098	5.11307	GSE136103	Resident NK	0	0	0	0
2911	0.645441	-4.53073	GSE136103	Neutrophils	0	0	0	0
2920	-6.3502	5.05466	GSE136103	MP	0	0	0	0
2958	-0.827898	10.054	GSE136103	Mesenchyme	0	0	0	2.63934
2982	-3.19553	0.535795	GSE136103	Neutrophils	0	0	0	0
3008	8.1012	4.81892	GSE136103	Resident NK	0	0	0	1.98804
3063	3.15496	-5.83094	GSE136103	T cells	0	0	0	2.30187
3075	-0.718119	-6.41256	GSE136103	T cells	0	0	0	0
3118	-0.0817424	5.4018	GSE136103	Cholangiocytes	0	0	0	0
3133	0.069311	5.79363	GSE136103	Cholangiocytes	0	0	0	0
3136	0.0154132	-8.43334	GSE136103	T cells	0	0	0	0
3148	7.73493	4.35822	GSE136103	Resident NK	0	0	0	0
3153	-0.788755	-5.36268	GSE136103	T cells	0	2.63572	0	0
3157	-12.6791	3.00336	GSE136103	MP	0	0	0	0
3162	-12.2337	3.94281	GSE136103	MP	0.893142	0	0	0
3174	-12.0812	4.80233	GSE136103	MP	0	0	0	0
3182	0.379363	-4.84724	GSE136103	Neutrophils	0	0	0	0
3191	-5.01543	-2.58519	GSE136103	T cells	0	0	0	0
3192	1.02892	5.38171	GSE136103	Cholangiocytes	0	0	0	1.11653
3212	-5.31774	4.07033	GSE136103	MP	0	0	0	0
3221	-1.57025	9.91443	GSE136103	Mesenchyme	0	0	0	1.92645
3253	3.80495	15.5312	GSE136103	Endothelial cells	0	0	0	0
3264	4.37745	-5.24051	GSE136103	T cells	0	0	0	0
3265	10.9226	-6.22269	GSE136103	Circulating NK/NKT	0	0	0	0
3303	0.947847	4.60439	GSE136103	Cholangiocytes	1.92896	0	0	0
3318	5.31608	5.51499	GSE136103	Resident NK	0	0	0	0
3334	-2.37824	-6.90536	GSE136103	T cells	0	0	0	0
3342	1.47731	3.87472	GSE136103	Cholangiocytes	0	0	0	0
3351	1.01959	4.61385	GSE136103	Cholangiocytes	0	0	0	0
3354	-5.63242	-2.77841	GSE136103	T cells	0	0	0	0
3366	-3.188	-4.47143	GSE136103	T cells	0	0	0	0
3368	-0.215217	4.29584	GSE136103	Cholangiocytes	0	0	0	0
3371	2.58669	10.8291	GSE136103	Endothelial cells	0	0	0	0
3383	6.64383	5.93327	GSE136103	Resident NK	0	0	0	0
3410	-1.17324	-14.1089	GSE136103	B cells	0	0	0	0
3411	-1.40825	9.94538	GSE136103	Mesenchyme	0	0	0	2.32484
3423	-4.24772	-2.27082	GSE136103	T cells	0	0	0	0
3426	-0.2679	9.26121	GSE136103	Mesenchyme	0	0	1.74813	4.45886
3433	-0.871895	-7.69426	GSE136103	T cells	0	0	0	0
3457	-0.6599	5.56868	GSE136103	Cholangiocytes	0	0	0	0
3462	10.1666	-6.03734	GSE136103	Circulating NK/NKT	0	0	0	0
3468	1.48117	11.5279	GSE136103	Endothelial cells	0	0	0	0
3497	2.45491	-3.24865	GSE136103	T cells	0	0	0	0
3535	6.13896	4.79127	GSE136103	Resident NK	0	0	0	0
3571	3.6309	-4.75211	GSE136103	T cells	0	0	0	0
3591	1.79375	-3.58761	GSE136103	T cells	0	0	0	0
3607	1.23639	5.03323	GSE136103	Cholangiocytes	0	0	0	0
3621	-4.05545	1.88921	GSE136103	Basophils	0	0	0	0
3635	1.05628	4.08303	GSE136103	Cholangiocytes	0	0	0	0
3642	-0.189355	9.54386	GSE136103	Mesenchyme	0	0	0	4.59746
3674	8.82887	4.52127	GSE136103	Resident NK	0	0	0	0
3676	-1.18219	-7.15442	GSE136103	T cells	0	0	0	0
3699	2.0195	8.08559	GSE136103	Mesenchyme	0	2.21375	2.21375	0
3705	-1.43619	10.0806	GSE136103	Mesenchyme	0	0	0	1.30592
3710	-6.10649	4.017	GSE136103	MP	0	0	0	0
3723	-1.1202	10.1032	GSE136103	Mesenchyme	0	0	1.23571	1.23571
3736	0.333516	4.26095	GSE136103	Cholangiocytes	0	0	0	0
3744	1.9181	12.2028	GSE136103	Endothelial cells	0	0	0	0
3745	3.6481	-6.82049	GSE136103	T cells	0	0	0	0
3773	3.03807	-4.91058	GSE136103	T cells	0	0	0	0
3790	8.18584	5.17369	GSE136103	Resident NK	0	0	0	0
3794	-0.317394	9.09616	GSE136103	Mesenchyme	0	0	0	0
3809	-1.49447	-4.92893	GSE136103	T cells	0	0	0	0
3839	0.15007	5.00956	GSE136103	Cholangiocytes	0	0	0	0
3853	-2.81492	-1.56158	GSE136103	T cells	0	0	0	0
3862	-9.8766	1.21835	GSE136103	MP	0	0	0	0
3879	-8.63674	-2.817	GSE136103	Mast cell	0	0	0	0
3890	4.32546	-5.22015	GSE136103	T cells	0	0	0	2.44559
3905	-2.17277	-6.79178	GSE136103	T cells	0	0	0	0
3908	-0.899488	13.414	GSE136103	Mesenchyme	0	0	0	0
3911	-1.1025	-5.62169	GSE136103	T cells	0	0	0	0
3918	-2.03212	-7.71299	GSE136103	T cells	0	0	0	0
3919	9.77628	-6.57087	GSE136103	Circulating NK/NKT	0	0	0	0
3925	9.08308	-5.58007	GSE136103	Circulating NK/NKT	0	0	0	0
3932	-5.50661	-1.65795	GSE136103	T cells	0	0	0	0
3940	-0.852357	-6.29952	GSE136103	T cells	0	0	0	0
3947	3.28207	-4.47931	GSE136103	T cells	0	0	0	0
3950	-1.31826	-4.71631	GSE136103	T cells	0	0	0	0
3971	-0.929521	-7.81137	GSE136103	T cells	0	0	0	0
3980	7.73826	4.63705	GSE136103	Resident NK	0	0	0	0
3982	11.6085	-5.65533	GSE136103	Circulating NK/NKT	0	0	0	0
3988	0.372931	4.65142	GSE136103	Cholangiocytes	0	0	0	0
4001	-0.314163	8.96683	GSE136103	Mesenchyme	0	0	0	4.52644
4002	-0.642604	-5.37868	GSE136103	T cells	0	0	0	0
4016	0.472413	4.3337	GSE136103	Cholangiocytes	0	0	0	0
4039	-3.14705	-3.87529	GSE136103	T cells	0	0	0	0
4041	-1.23874	10.0789	GSE136103	Mesenchyme	0	0	1.64763	3.08982
4055	-1.85417	9.42664	GSE136103	Mesenchyme	1.5501	0	1.5501	0
4066	0.975158	5.32102	GSE136103	Cholangiocytes	0	0	0	0
4080	-0.995715	10.1134	GSE136103	Mesenchyme	0	0	0	0
4126	-1.85813	9.39936	GSE136103	Mesenchyme	0	0	0	0
4143	5.80455	5.90097	GSE136103	Resident NK	0	0	0	2.62615
4149	8.81788	4.95209	GSE136103	Resident NK	0	0	0	0
4161	-0.447302	5.37019	GSE136103	Cholangiocytes	0	0	0	0
4171	-2.76846	-4.4784	GSE136103	T cells	0	0	0	0
4200	8.34802	3.26305	GSE136103	Resident NK	0	0	0	0
4203	-1.14148	-4.578	GSE136103	T cells	0	0	0	0
4213	-10.3178	7.96406	GSE136103	MP	1.62958	0	0	0
4217	-1.93936	9.45882	GSE136103	Mesenchyme	0	0	0	0
4218	-8.42769	3.80221	GSE136103	MP	0	0	0	0
4252	2.14258	-3.69247	GSE136103	T cells	0	0	0	0
4265	-2.41588	-5.20113	GSE136103	T cells	0	0	0	0
4280	0.6881	4.75716	GSE136103	Cholangiocytes	2.24257	0	0	0
4284	0.683711	4.74149	GSE136103	Cholangiocytes	0	0	0	0
4288	0.062775	5.34234	GSE136103	Cholangiocytes	0	0	0	0
4293	7.01927	5.65834	GSE136103	Resident NK	0	0	0	0
4296	3.48321	-4.89896	GSE136103	T cells	0	0	0	0
4298	-2.96616	-2.69286	GSE136103	T cells	0	0	0	0
4309	-2.01676	0.389625	GSE136103	Neutrophils	0	0	0	0
4310	6.59621	5.36658	GSE136103	Resident NK	0	0	0	0
4317	2.0034	-4.20026	GSE136103	T cells	0	2.25623	0	0
4322	3.97249	-5.27949	GSE136103	T cells	0	0	0	0
4323	8.79464	4.88875	GSE136103	Resident NK	0	0	0	0
4342	0.418534	5.95156	GSE136103	Cholangiocytes	0	0	0	0
4366	-0.135249	3.91404	GSE136103	Neutrophils	0	0	0	0
4383	0.319188	5.98119	GSE136103	Cholangiocytes	0	0	0	0
4406	-0.941383	-7.60203	GSE136103	T cells	0	0	0	0
4416	-1.23882	10.0031	GSE136103	Mesenchyme	0	0	0	0
4417	-1.58742	-4.81476	GSE136103	T cells	0	0	0	2.17825
4441	-2.47395	-4.62116	GSE136103	T cells	0	0	0	0
4453	10.1812	-5.81699	GSE136103	Circulating NK/NKT	0	0	0	0
4492	8.60114	5.04055	GSE136103	Resident NK	0	0	0	0
4512	0.0444164	5.11717	GSE136103	Cholangiocytes	0	0	0	0
4519	-3.06289	-7.2584	GSE136103	T cells	0	0	0	2.02824
4556	-0.243268	9.1706	GSE136103	Mesenchyme	0	0	2.3047	4.91499
4572	-5.39532	-2.21885	GSE136103	T cells	0	0	0	0
4577	-2.81664	-6.76447	GSE136103	T cells	0	0	0	0
4592	3.87756	-4.66654	GSE136103	T cells	0	0	0	0
4594	-1.11602	-2.53841	GSE136103	Neutrophils	0	0	0	0
4601	-1.09062	10.0383	GSE136103	Mesenchyme	0	0	0	3.75596
4611	-9.77497	1.19701	GSE136103	MP	0	0	0	0
4620	7.75608	5.35944	GSE136103	Resident NK	0	0	0	0
4643	2.15444	-6.56464	GSE136103	T cells	0	0	0	0
4645	-0.146439	5.34221	GSE136103	Cholangiocytes	0	0	0	0
4668	-3.78424	-2.15129	GSE136103	T cells	0	0	0	0
4676	0.189354	-6.59692	GSE136103	T cells	2.68013	0	0	0
4682	-0.368332	9.70544	GSE136103	Mesenchyme	0	0	0	4.61564
4684	6.21543	5.52118	GSE136103	Resident NK	0	0	0	0
4691	-3.20162	-4.58508	GSE136103	T cells	0	0	0	0
4705	-0.208334	9.32364	GSE136103	Mesenchyme	0	0	0	4.4293
4720	8.61992	5.11843	GSE136103	Resident NK	0	0	0	0
4735	-1.42525	-4.98796	GSE136103	T cells	0	0	0	0
4756	1.26765	4.8838	GSE136103	Cholangiocytes	0	0	0	0
4789	-8.92754	-3.38355	GSE136103	Mast cell	0	0	0	0
4797	10.3046	-4.33894	GSE136103	Circulating NK/NKT	0	0	0	2.15701
4804	1.49815	4.04126	GSE136103	Cholangiocytes	0	0	0	0
4816	-0.779787	9.9479	GSE136103	Mesenchyme	0	0	0	2.18383
4835	1.97928	11.7606	GSE136103	Endothelial cells	0	0	0	0
4855	7.72104	3.27255	GSE136103	Resident NK	0	0	0	0
4890	1.41964	4.55462	GSE136103	Cholangiocytes	0	0	0	0
4913	7.95405	5.30523	GSE136103	Resident NK	0	0	0	0
4929	-0.569739	6.08067	GSE136103	Cholangiocytes	0	0	0	0
4956	-3.49616	-1.99152	GSE136103	T cells	0	0	0	0
4958	-1.93255	-4.55774	GSE136103	T cells	0	0	0	0
4959	-4.88178	-2.19861	GSE136103	T cells	0	0	0	0
4976	-5.8105	4.64431	GSE136103	MP	0	0	0	0
5014	-3.49919	-2.40549	GSE136103	T cells	0	0	0	0
5015	-0.564749	8.90017	GSE136103	Mesenchyme	0	0	0	4.8091
5032	-0.0264936	6.46401	GSE136103	Cholangiocytes	0	0	0	0
5042	-0.164948	6.53205	GSE136103	Cholangiocytes	0	0	0	0
5047	-0.483325	9.82497	GSE136103	Mesenchyme	0	0	0	3.36431
5063	-2.50177	-5.21788	GSE136103	T cells	0	0	0	0
5072	11.0501	-6.10205	GSE136103	Circulating NK/NKT	0	0	0	0
5073	8.47991	4.97279	GSE136103	Resident NK	0	0	0	0
5083	-2.23961	-6.88214	GSE136103	T cells	0	0	0	0
5099	3.93201	-5.35103	GSE136103	T cells	0	0	0	0
5116	-4.21692	-1.84243	GSE136103	T cells	0	0	0	0
5130	5.76202	5.78856	GSE136103	Resident NK	0	0	0	0
5132	1.15262	4.40897	GSE136103	Cholangiocytes	0	0	0	0
5140	6.17699	5.60474	GSE136103	Resident NK	0	0	0	0
5174	-0.145609	5.25763	GSE136103	Cholangiocytes	0	0	0	0
5183	-1.72263	-8.30969	GSE136103	T cells	0	0	0	0
5208	2.40361	-4.93522	GSE136103	T cells	0	0	0	0
5218	1.08577	5.16611	GSE136103	Cholangiocytes	0	0	0	0
5235	-3.30987	-2.56641	GSE136103	T cells	0	0	0	0
5239	-2.56982	-7.13412	GSE136103	T cells	0	0	0	0
5243	7.67441	3.49871	GSE136103	Resident NK	0	0	0	0
5246	-10.079	1.43274	GSE136103	MP	0	0	0	0
5266	2.54508	-5.65607	GSE136103	T cells	0	0	0	2.20007
5278	0.311956	5.69123	GSE136103	Cholangiocytes	0	0	0	0
5284	5.50957	5.87854	GSE136103	Resident NK	0	0	0	0
5309	-5.53253	3.88894	GSE136103	MP	0	0	0	0
5314	-1.6249	9.81549	GSE136103	Mesenchyme	0	0	0	0
5320	10.8977	-6.83804	GSE136103	Circulating NK/NKT	0	0	0	0
5379	-1.58331	-7.00422	GSE136103	T cells	0	0	0	0
5401	0.111114	4.91489	GSE136103	Cholangiocytes	0	0	0	0
5410	-0.00493288	6.5492	GSE136103	Cholangiocytes	0	0	0	0
5430	8.55512	4.84987	GSE136103	Resident NK	0	0	0	0
5431	-7.68744	-1.18431	GSE136103	Mast cell	0	0	0	0
5438	10.9196	-4.77342	GSE136103	Circulating NK/NKT	0	0	0	0
5453	-3.61633	-2.63406	GSE136103	T cells	0	0	0	0
5464	0.693851	5.10383	GSE136103	Cholangiocytes	0	0	0	0
5465	-7.9193	3.97583	GSE136103	MP	0	0	0	0
5467	-0.883628	-7.18898	GSE136103	T cells	0	0	0	0
5471	-6.88268	0.0175175	GSE136103	Mast cell	0	0	0	0
5477	7.46791	5.40927	GSE136103	Resident NK	0	0	0	0
5479	1.54367	8.52087	GSE136103	Mesenchyme	2.42094	0	3.4585	0
5480	-0.477102	-8.62165	GSE136103	T cells	0	0	0	0
5494	10.8185	-6.4263	GSE136103	Circulating NK/NKT	0	0	0	0
5502	-1.98335	-6.6944	GSE136103	T cells	0	0	0	0
5512	-0.366357	-3.66248	GSE136103	T cells	0	0	0	0
5521	1.59931	4.39093	GSE136103	Cholangiocytes	0	0	0	0
5523	8.07681	4.41445	GSE136103	Resident NK	0	0	0	0
5526	-4.33371	5.65914	GSE136103	MP	0	0	0	0
5535	10.6345	-6.59015	GSE136103	Circulating NK/NKT	0	0	0	0
5554	-2.19463	-4.7086	GSE136103	T cells	0	0	0	0
5578	-5.76022	-2.21984	GSE136103	T cells	0	0	0	0
5600	8.15057	4.39266	GSE136103	Resident NK	0	0	0	0
5614	-1.58205	-4.12362	GSE136103	T cells	0	0	0	0
5617	9.81071	-6.57463	GSE136103	Circulating NK/NKT	0	0	0	0
5621	-2.57695	-5.76775	GSE136103	T cells	0	0	0	1.67952
5625	-12.4683	3.20178	GSE136103	MP	0	0	0	0
5629	-2.20453	-6.9696	GSE136103	T cells	0	0	0	0
5630	7.91391	5.19747	GSE136103	Resident NK	0	0	0	0
5647	-0.767284	-5.24268	GSE136103	T cells	0	0	0	0
5655	-0.807823	-7.37809	GSE136103	T cells	0	0	0	0
5665	0.102519	6.77956	GSE136103	Cholangiocytes	0	0	0	0
5667	-2.07627	-3.45869	GSE136103	T cells	0	0	0	0
5670	1.2029	4.18873	GSE136103	Cholangiocytes	0	0	0	0
5676	4.59159	14.8023	GSE136103	Endothelial cells	0	0	0	0
5681	3.54799	-6.70494	GSE136103	T cells	0	0	0	0
5686	-0.347638	9.4029	GSE136103	Mesenchyme	0	0	0	4.83172
5687	4.8664	5.19711	GSE136103	Resident NK	0	0	0	0
5694	3.6811	-6.8581	GSE136103	T cells	0	0	0	0
5703	7.6207	5.50833	GSE136103	Resident NK	0	0	0	0
5706	-9.6433	7.5147	GSE136103	MP	0	0	0	0
5709	-7.04201	4.45908	GSE136103	MP	0	0	0	0
5717	9.20875	4.37942	GSE136103	Resident NK	0	0	0	0
5727	-1.1987	9.56435	GSE136103	Mesenchyme	0	0	0	0
5728	-1.68919	9.76585	GSE136103	Mesenchyme	0	0	0	1.6627
5735	6.56588	5.08394	GSE136103	Resident NK	0	0	0	0
5741	1.30038	4.41222	GSE136103	Cholangiocytes	0	0	0	0
5745	-12.029	4.4572	GSE136103	MP	0	0	0	0
5770	-1.89446	9.44076	GSE136103	Mesenchyme	0	0	0	0
5777	10.1686	-6.16241	GSE136103	Circulating NK/NKT	0	0	0	0
5795	6.48177	5.88806	GSE136103	Resident NK	0	0	0	0
5797	-5.31315	-3.48859	GSE136103	T cells	0	0	0	0
5804	3.76256	-6.82369	GSE136103	T cells	0	0	0	0
5846	-0.586455	8.79915	GSE136103	Mesenchyme	0	0	0	4.04804
5859	-1.09542	5.71058	GSE136103	Cholangiocytes	0	0	0	0
5861	2.74962	-6.86235	GSE136103	T cells	0	0	0	0
5873	11.4933	-6.55275	GSE136103	Circulating NK/NKT	2.42	0	0	0
5881	6.85042	5.66604	GSE136103	Circulating NK/NKT	0	0	0	0
5886	-3.23199	0.704524	GSE136103	Neutrophils	0	0	0	0
5899	-12.6883	3.28102	GSE136103	MP	0	0	0	0
5900	2.3536	11.749	GSE136103	Endothelial cells	0	0	0	0
5911	-6.80193	4.02339	GSE136103	MP	0	0	0	0
5934	1.04771	5.21716	GSE136103	Cholangiocytes	0	0	0	0
5950	-0.020293	5.69518	GSE136103	Cholangiocytes	0	0	0	0
5952	2.58974	-6.51416	GSE136103	T cells	0	0	0	0
5961	-11.9498	4.58863	GSE136103	MP	0	0	0	1.26925
6016	-8.7334	-2.97673	GSE136103	Mast cell	0	0	0	1.03738
6021	0.356846	3.65998	GSE136103	Cholangiocytes	0	0	0	0
6035	0.166604	-4.34857	GSE136103	T cells	0	0	0	0
6036	-5.27492	5.68081	GSE136103	MP	0	0	0	0
6041	-12.0647	-5.37349	GSE136103	pDCs	0	0	0	0
6047	-1.42166	-4.88643	GSE136103	T cells	0	0	0	0
6062	-5.19395	5.53606	GSE136103	MP	0	0	0	1.8822
6086	-0.589526	-2.71297	GSE136103	Neutrophils	2.62854	0	0	0
6099	0.20586	6.15514	GSE136103	Cholangiocytes	0	0	0	0
6103	7.48489	5.30173	GSE136103	Resident NK	0	0	0	0
6125	-1.5885	9.64356	GSE136103	Mesenchyme	0	0	0	3.6458
6147	6.26147	-2.44137	GSE136103	T cells	0	0	0	0
6150	-2.00102	-5.15245	GSE136103	T cells	0	0	0	2.19509
6162	-3.02976	-2.32427	GSE136103	T cells	0	0	0	0
6167	9.06246	3.80252	GSE136103	Resident NK	0	0	0	0
6170	-4.38878	-2.28794	GSE136103	T cells	0	0	0	0
6213	-0.879126	-1.02325	GSE136103	Neutrophils	0	0	0	0
6225	-0.631001	9.94866	GSE136103	Mesenchyme	0	0	0	2.54831
6230	-11.6607	4.80369	GSE136103	MP	0	0	0	0
6232	-7.20172	4.79869	GSE136103	MP	0	0	0	0
6239	-1.54699	-6.72886	GSE136103	T cells	0	0	0	0
6241	0.135073	4.80994	GSE136103	Cholangiocytes	0	0	0	0
6253	-4.6837	-2.75976	GSE136103	T cells	0	0	0	0
6256	7.81597	3.00929	GSE136103	Resident NK	0	0	0	0
6271	11.0044	-7.16901	GSE136103	Circulating NK/NKT	0	0	0	0
6295	7.89856	3.57137	GSE136103	Resident NK	0	0	0	0
6301	3.94031	10.481	GSE136103	Endothelial cells	0	0	0	0
6309	-1.89412	9.51959	GSE136103	Mesenchyme	0	0	0	0
6319	-0.982072	10.0275	GSE136103	Mesenchyme	0	0	0	2.73049
6325	-1.87137	9.58227	GSE136103	Mesenchyme	0	0	0	0
6341	1.19639	-4.65387	GSE136103	T cells	0	0	0	0
6361	0.354756	-7.18777	GSE136103	T cells	0	0	0	0
6384	3.22238	-6.65633	GSE136103	T cells	0	0	0	0
6405	-12.7669	3.00632	GSE136103	MP	0	0	0	0
6407	2.92592	-6.82897	GSE136103	T cells	0	0	0	0
6413	-1.86695	9.6042	GSE136103	Mesenchyme	0	0	0	0
6417	-3.53177	-3.50059	GSE136103	T cells	0	0	0	0
6423	0.292871	5.27554	GSE136103	Cholangiocytes	0	0	0	0
6441	9.26085	4.10359	GSE136103	Resident NK	0	0	0	0
6462	1.58708	8.66624	GSE136103	Mesenchyme	1.89794	1.89794	1.89794	0
6479	-0.664229	9.95854	GSE136103	Mesenchyme	0	0	0	2.81275
6483	1.35104	4.79196	GSE136103	Cholangiocytes	1.55274	0	0	0
6514	-1.55521	9.86636	GSE136103	Mesenchyme	0	0	0	2.21448
6521	5.89294	4.9652	GSE136103	Resident NK	0	0	0	0
6525	8.72804	6.0249	GSE136103	Resident NK	0	0	0	0
6534	7.72394	3.42002	GSE136103	Resident NK	0	0	0	0
6539	0.352073	4.99748	GSE136103	Cholangiocytes	0	0	0	0
6542	-0.347936	5.50597	GSE136103	Cholangiocytes	0	0	0	0
6545	-0.39137	9.77401	GSE136103	Mesenchyme	0	0	0	4.46027
6550	-1.87882	-4.97436	GSE136103	T cells	0	0	0	0
6583	7.78164	4.29132	GSE136103	Resident NK	0	0	0	0
6600	-1.58577	-5.19506	GSE136103	T cells	0	0	0	0
6622	3.47841	-5.05382	GSE136103	T cells	0	0	0	0
6636	-0.812086	10.0578	GSE136103	Mesenchyme	0	0	0	2.57535
6642	0.607904	-2.854	GSE136103	T cells	0	0	0	0
6643	11.0169	-7.07158	GSE136103	Circulating NK/NKT	0	0	0	0
6662	-0.458055	8.97941	GSE136103	Mesenchyme	0	0	0	4.29679
6667	-1.38015	9.86325	GSE136103	Mesenchyme	0	0	0	1.66966
6672	0.275203	4.80408	GSE136103	Cholangiocytes	0	0	0	0
6679	0.500196	4.94425	GSE136103	Cholangiocytes	0	0	0	0
6689	-1.31651	-14.5221	GSE136103	B cells	0	0	0	0
6695	0.0752597	4.63285	GSE136103	Cholangiocytes	0	0	0	0
6712	0.69323	5.97076	GSE136103	Cholangiocytes	0	0	0	0
6726	3.67039	-6.83288	GSE136103	T cells	0	0	0	0
6749	3.02034	-4.84332	GSE136103	T cells	0	0	0	0
6776	8.94201	4.13012	GSE136103	Resident NK	0	0	0	0
6784	-1.56183	9.87282	GSE136103	Mesenchyme	0	0	0	0
6785	0.14035	5.27461	GSE136103	Cholangiocytes	0	0	0	0
6788	-6.42018	4.1467	GSE136103	MP	0	0	0	0
6790	11.3174	-6.38904	GSE136103	Circulating NK/NKT	0	0	0	0
6802	4.06217	-6.39808	GSE136103	T cells	0	0	0	0
6829	3.95304	-6.09032	GSE136103	T cells	0	0	0	0
6833	6.57902	-3.23174	GSE136103	T cells	0	0	0	0
6864	-0.346263	-14.1671	GSE136103	B cells	0	0	0	0
6873	8.32417	5.40029	GSE136103	Resident NK	2.15431	0	0	0
6879	-0.268857	-4.50469	GSE136103	Neutrophils	0	0	0	2.49719
6881	7.02842	5.68215	GSE136103	Resident NK	0	0	0	0
6891	-5.41201	-3.43218	GSE136103	T cells	0	1.90375	0	0
6930	-10.7133	5.47608	GSE136103	MP	0	0	0	0
6933	-2.30803	-4.47094	GSE136103	T cells	0	0	0	0
6941	-1.03062	9.94277	GSE136103	Mesenchyme	0	0	0	2.87325
6962	-0.526202	4.8323	GSE136103	Cholangiocytes	0	0	0	0
6972	-3.35731	-1.96824	GSE136103	T cells	0	0	0	0
6984	-1.21513	10.1351	GSE136103	Mesenchyme	0	0	0	0
6989	4.91073	4.87117	GSE136103	Resident NK	0	0	0	0
7010	-1.04564	-7.11976	GSE136103	T cells	0	0	0	0
7012	0.330665	4.78954	GSE136103	Cholangiocytes	0	0	0	0
7013	-4.33062	-4.10554	GSE136103	T cells	0	0	0	0
7018	-1.32859	10.0978	GSE136103	Mesenchyme	0	0	0	2.5179
7049	9.96082	-5.61486	GSE136103	Circulating NK/NKT	0	0	0	0
7052	-0.176519	9.32764	GSE136103	Mesenchyme	0	0	0	4.36239
7053	0.353288	-3.76062	GSE136103	Neutrophils	0	0	0	0
7056	-0.0311975	-8.66071	GSE136103	T cells	0	0	0	0
7111	-7.6574	11.526	GSE136103	MP	0	0	0	0
7114	0.301164	-5.31092	GSE136103	T cells	0	0	0	0
7121	-0.39384	5.19099	GSE136103	Cholangiocytes	0	0	0	0
7146	-3.32203	-4.22923	GSE136103	T cells	0	0	0	0
7149	0.390767	4.68291	GSE136103	Cholangiocytes	0	0	0	0
7150	0.678094	0.510741	GSE136103	Hepatocytes	0	0	0	0
7154	-3.17299	-2.64233	GSE136103	T cells	0	0	0	0
7160	-3.05344	-1.71094	GSE136103	T cells	0	0	0	0
7207	0.026932	6.72986	GSE136103	Cholangiocytes	1.81462	0	0	0
7214	8.60439	5.29853	GSE136103	Resident NK	0	0	0	0
7222	10.804	-4.55448	GSE136103	Circulating NK/NKT	0	0	0	0
7241	0.777847	4.70657	GSE136103	Cholangiocytes	0	0	0	0
7256	-1.94817	-5.74433	GSE136103	Neutrophils	0	0	0	0
7259	-1.85058	9.48506	GSE136103	Mesenchyme	0	0	0	0
7260	0.701122	5.09246	GSE136103	Cholangiocytes	0	0	0	0
7332	7.82672	-3.54296	GSE136103	T cells	0	0	0	0
7334	-0.295552	9.77797	GSE136103	Mesenchyme	0	0	0	3.70414
7340	8.30521	4.40637	GSE136103	Resident NK	0	0	0	0
7357	-3.19793	-1.46936	GSE136103	T cells	0	0	0	0
7360	-1.0005	-6.46907	GSE136103	T cells	0	0	0	2.00731
7373	-0.821476	-3.99138	GSE136103	Neutrophils	0	0	0	3.58368
7377	-1.95391	9.58499	GSE136103	Mesenchyme	0	0	0	0
7386	1.65138	-3.57927	GSE136103	T cells	0	0	0	0
7394	-2.51698	-7.71142	GSE136103	T cells	0	0	0	0
7402	11.2575	-6.16229	GSE136103	Circulating NK/NKT	0	0	0	0
7407	-0.0836152	4.91256	GSE136103	Cholangiocytes	0	0	0	0
7412	4.1166	10.7317	GSE136103	Endothelial cells	0	0	0	0
7465	-11.8127	3.17948	GSE136103	MP	0	0	0	0
7473	-2.81046	-2.36592	GSE136103	T cells	0	0	0	0
7478	0.146999	5.31992	GSE136103	Cholangiocytes	0	0	0	1.98858
7481	0.0775638	4.87136	GSE136103	Cholangiocytes	0	0	0	0
7482	3.94565	-5.90845	GSE136103	T cells	0	0	0	0
7499	-8.25527	4.04245	GSE136103	MP	0	0	0	0
7514	-7.7748	3.95043	GSE136103	MP	0	0	0	0
7534	-2.75518	-3.01488	GSE136103	T cells	0	0	0	0
7556	0.616054	5.06174	GSE136103	Cholangiocytes	0	0	0	0
7570	1.19755	8.67144	GSE136103	Mesenchyme	0	1.64021	0	0
7574	8.05284	4.55306	GSE136103	Resident NK	0	0	0	0
7579	-0.285211	9.3549	GSE136103	Mesenchyme	0	0	0	4.15566
7581	5.70801	5.61119	GSE136103	Resident NK	0	0	0	0
7618	-4.74742	-2.5741	GSE136103	T cells	0	0	0	0
7633	11.0729	-6.38693	GSE136103	Circulating NK/NKT	0	0	0	0
7665	-12.4397	4.0602	GSE136103	MP	0	0	0	0
7706	-4.2546	-2.15355	GSE136103	T cells	0	0	0	0
7721	-3.93013	-3.57142	GSE136103	T cells	0	0	0	0
7732	-0.739864	10.009	GSE136103	Mesenchyme	0	0	0	4.39445
7735	7.81168	5.51749	GSE136103	Resident NK	0	0	0	2.25089
7763	-2.82014	-4.01657	GSE136103	T cells	0	0	0	0
7769	5.39207	5.15001	GSE136103	Resident NK	0	0	0	0
7805	7.6496	4.11384	GSE136103	Resident NK	0	0	0	0
7819	-0.105463	4.15096	GSE136103	Cholangiocytes	0	0	0	0
7823	6.71691	5.94839	GSE136103	Resident NK	0	0	0	0
7827	0.0677551	6.50595	GSE136103	Cholangiocytes	0	0	0	0
7853	-2.7211	-6.38715	GSE136103	T cells	0	0	0	0
7857	-10.234	7.40308	GSE136103	MP	0	0	0	0
7889	-0.165038	-4.39449	GSE136103	Neutrophils	0	0	0	0
7898	-5.204	-3.62251	GSE136103	T cells	0	0	0	0
7902	7.40866	5.23904	GSE136103	Resident NK	0	0	0	2.41721
7911	-2.03827	-6.04229	GSE136103	T cells	0	0	0	0
7913	3.68192	-5.53908	GSE136103	T cells	0	0	0	0
7920	-10.4406	6.9113	GSE136103	MP	0	0	0	0
7922	0.0125664	4.99096	GSE136103	Cholangiocytes	0	0	0	0
7926	7.43497	3.29843	GSE136103	Resident NK	0	0	0	0
7933	-1.23207	-4.97657	GSE136103	T cells	0	0	0	0
7948	-0.340732	5.24563	GSE136103	Cholangiocytes	0	0	0	0
7967	-8.88048	2.43301	GSE136103	MP	0	0	0	0
7974	-1.03901	10.1338	GSE136103	Mesenchyme	0	0	0	2.86593
7980	-1.04465	10.0336	GSE136103	Mesenchyme	0	0	0	3.20724
7990	5.18539	5.63449	GSE136103	Resident NK	0	0	0	0
7995	4.40491	-5.96054	GSE136103	T cells	0	0	0	0
8012	8.31559	3.35576	GSE136103	Resident NK	0	0	0	0
8013	1.53631	4.183	GSE136103	Cholangiocytes	0	0	0	0
8020	1.54177	4.53221	GSE136103	Cholangiocytes	0	0	0	0
8024	2.96056	-5.38195	GSE136103	T cells	0	0	0	0
8025	3.70092	-5.32932	GSE136103	T cells	0	0	0	0
8029	1.41168	4.46602	GSE136103	Cholangiocytes	0	0	0	0
8052	-2.58301	-1.76102	GSE136103	T cells	0	0	0	0
8053	0.322698	4.38608	GSE136103	Cholangiocytes	0	0	0	0
8058	8.08964	4.75017	GSE136103	Resident NK	2.49514	0	0	0
8068	-3.73163	-3.2471	GSE136103	T cells	0	0	0	0
8107	6.2871	4.86854	GSE136103	Resident NK	0	0	0	0
8112	-1.92667	-6.47349	GSE136103	T cells	0	0	0	0
8187	-7.87768	3.13471	GSE136103	MP	0	0	0	0
8214	0.890432	4.55749	GSE136103	Cholangiocytes	0	0	0	0
8218	4.0488	-4.72924	GSE136103	T cells	0	0	0	0
8250	0.280085	6.77286	GSE136103	Cholangiocytes	0	0	0	0
8259	-8.71337	4.7828	GSE136103	MP	0	0	0	0
8266	-3.67317	-1.80572	GSE136103	T cells	0	0	0	0
8280	-4.39456	-3.12128	GSE136103	T cells	0	0	0	0
8286	3.64862	-6.31443	GSE136103	T cells	0	0	0	0
8297	-8.86901	-10.7477	GSE136103	Plasma cells	0	0	0	0
8382	0.124149	4.46856	GSE136103	Hepatocytes	0	0	0	0
8390	-5.51677	-2.95136	GSE136103	T cells	0	0	0	0
8392	-1.17061	10.0872	GSE136103	Mesenchyme	0	0	0	4.25397
8394	-0.0873725	6.39691	GSE136103	Cholangiocytes	0	0	1.85897	0
8426	0.296048	-8.64617	GSE136103	T cells	0	0	0	0
8449	7.21627	3.2689	GSE136103	Resident NK	0	0	0	0
8484	-1.05981	5.73722	GSE136103	Cholangiocytes	0	0	0	0
8486	-1.01726	10.0634	GSE136103	Mesenchyme	0	0	0	3.2605
8520	-1.00692	-5.93717	GSE136103	T cells	0	0	0	0
8533	-0.0296789	-14.3055	GSE136103	B cells	0	0	0	0
8534	-3.20212	-3.23657	GSE136103	T cells	0	0	0	0
8543	2.96688	-4.93188	GSE136103	T cells	0	0	0	0
8547	3.19927	-5.98939	GSE136103	T cells	0	0	0	0
8560	9.68285	-4.49983	GSE136103	Circulating NK/NKT	0	0	0	0
8584	10.8798	-6.87601	GSE136103	Circulating NK/NKT	0	0	0	0
8593	-10.5177	5.38089	GSE136103	MP	0	0	0	0
8596	-1.57819	9.90848	GSE136103	Mesenchyme	0	0	0	4.0472
8612	1.35042	4.94859	GSE136103	Cholangiocytes	0	0	0	0
8619	1.31679	5.0235	GSE136103	Cholangiocytes	1.52066	0	0	0
8623	8.31459	3.92932	GSE136103	Resident NK	0	0	0	0
8637	-7.69719	4.67348	GSE136103	MP	0	0	0	0
8638	-1.40102	9.99117	GSE136103	Mesenchyme	0	0	0	1.38637
8666	-1.79886	9.68908	GSE136103	Mesenchyme	0	0	0	4.50386
8669	-0.966694	-4.92081	GSE136103	T cells	0	0	0	0
8697	0.730716	4.62354	GSE136103	Cholangiocytes	0	0	0	0
8723	3.30598	-6.27677	GSE136103	T cells	0	0	0	0
8733	1.33067	4.26929	GSE136103	Cholangiocytes	0	0	0	0
8776	0.422315	4.91452	GSE136103	Cholangiocytes	0	0	0	0
8778	1.01687	5.45676	GSE136103	Cholangiocytes	0	0	0	0
8802	-0.39833	-14.5161	GSE136103	B cells	0	0	0	0
8833	7.34897	5.76703	GSE136103	Resident NK	0	0	0	1.98695
8842	6.81429	4.21537	GSE136103	Resident NK	0	0	0	0
8896	-5.04523	4.34181	GSE136103	MP	0	0	0	0
8900	4.06667	-5.94604	GSE136103	T cells	0	0	0	0
8908	0.504734	4.7691	GSE136103	Cholangiocytes	0	0	0	0
8914	-0.354705	-5.86168	GSE136103	T cells	0	0	0	0
8935	6.69655	-3.38744	GSE136103	T cells	0	0	0	0
8937	11.6034	-6.77637	GSE136103	Circulating NK/NKT	0	0	0	0
8959	-2.20764	-5.07768	GSE136103	T cells	0	0	0	0
8971	4.87356	14.0597	GSE136103	Endothelial cells	0	0	0	0
8978	-2.50848	-3.50398	GSE136103	T cells	0	0	0	0
8991	-2.35641	-3.94947	GSE136103	T cells	0	0	0	0
9009	-0.123638	6.30182	GSE136103	Cholangiocytes	0	0	0	0
9049	8.25522	5.19114	GSE136103	Resident NK	0	0	0	0
9055	-4.9663	-3.45208	GSE136103	T cells	0	0	0	0
9068	-0.302062	-5.14013	GSE136103	T cells	0	0	0	0
9072	8.60141	4.09839	GSE136103	Resident NK	0	0	0	0
9079	0.786405	-4.55501	GSE136103	T cells	0	0	0	0
9086	-3.0546	-3.90347	GSE136103	T cells	0	0	0	0
9093	-12.85	3.68583	GSE136103	MP	0	0	0	0
9113	-3.54322	-2.92299	GSE136103	T cells	0	0	0	0
9125	-11.7893	4.90543	GSE136103	MP	0	0	0	0
9148	1.16081	4.91822	GSE136103	Cholangiocytes	1.71709	0	0	1.71709
9158	3.15128	-5.04025	GSE136103	T cells	0	0	0	0
9177	3.08982	-6.39917	GSE136103	T cells	2.42	0	0	0
9204	8.24412	3.86957	GSE136103	Resident NK	0	0	0	0
9205	2.08941	11.3124	GSE136103	Endothelial cells	0	0	0	0
9209	2.81045	-4.81215	GSE136103	T cells	0	0	0	0
9221	-5.17952	-1.49592	GSE136103	T cells	0	0	0	0
9229	-5.96441	3.78106	GSE136103	MP	0	0	0	0
9243	3.89549	-6.40632	GSE136103	T cells	0	0	0	0
9286	0.77859	-4.9026	GSE136103	T cells	0	0	0	0
9299	0.634051	4.80341	GSE136103	Cholangiocytes	0	0	0	0
9304	1.79093	-6.57741	GSE136103	T cells	0	0	0	0
9331	-1.78022	-6.99954	GSE136103	T cells	0	0	0	0
9336	4.5298	-4.85201	GSE136103	T cells	0	0	0	0
9347	-3.94264	-2.46132	GSE136103	T cells	0	0	0	0
9355	-1.13574	10.0279	GSE136103	Mesenchyme	0	0	0	2.80798
9357	0.0444444	5.12134	GSE136103	Cholangiocytes	0	0	0	0
9360	-6.68489	4.34238	GSE136103	MP	0	0	0	0
9362	7.42322	5.56044	GSE136103	Resident NK	0	0	0	0
9409	10.3981	-5.62815	GSE136103	Circulating NK/NKT	0	0	0	0
9432	-8.32613	3.08557	GSE136103	MP	0	0	0	0
9463	6.71913	5.58443	GSE136103	Resident NK	0	0	0	0
9467	8.52624	5.06232	GSE136103	Resident NK	0	0	0	0
9471	-9.01377	5.0808	GSE136103	MP	0	0	0	0
9472	10.9114	-6.07068	GSE136103	Circulating NK/NKT	0	0	0	0
9487	0.0418207	6.30538	GSE136103	Cholangiocytes	0	0	0	0
9496	8.74427	4.96916	GSE136103	Resident NK	0	0	0	0
9507	0.55034	-5.61411	GSE136103	T cells	0	0	0	0
9539	0.706695	4.85836	GSE136103	Cholangiocytes	0	0	0	0
9546	-1.61342	-7.58757	GSE136103	T cells	0	0	0	0
9554	9.72425	-4.79136	GSE136103	Circulating NK/NKT	0	0	0	0
9568	11.6001	-5.87893	GSE136103	Circulating NK/NKT	0	0	0	0
9590	-0.26686	-7.47222	GSE136103	T cells	0	0	0	0
9594	-3.79928	-4.25985	GSE136103	T cells	0	0	0	0
9607	-3.24234	-4.79624	GSE136103	T cells	0	0	0	0
9613	3.97191	-6.1465	GSE136103	T cells	0	0	0	0
9662	0.996562	5.43903	GSE136103	Cholangiocytes	0	0	0	0
9675	1.44418	2.39307	GSE136103	Cholangiocytes	1.33036	0	0	0
9685	-2.40098	-3.79337	GSE136103	T cells	0	0	0	0
9698	-2.1222	-6.98512	GSE136103	T cells	0	0	0	0
9700	-0.521644	9.92272	GSE136103	Mesenchyme	0	0	0	3.68361
9717	2.59209	-4.97068	GSE136103	T cells	0	0	0	0
9720	-0.145989	5.40158	GSE136103	Cholangiocytes	0.780706	0	0	0
9727	-12.5936	3.32839	GSE136103	MP	0	0	0	0
9793	-3.16467	-1.98431	GSE136103	T cells	0	0	0	0
9812	2.73497	-6.36457	GSE136103	T cells	0	0	0	0
9818	-3.82323	-3.92781	GSE136103	T cells	0	0	0	0
9821	-6.68211	4.80502	GSE136103	MP	1.94266	0	0	0
9824	-1.87251	9.57088	GSE136103	Mesenchyme	0	0	0	0
9830	-2.69777	-5.23921	GSE136103	T cells	0	0	0	0
9849	-6.0053	5.57815	GSE136103	MP	0	0	0	0
9852	10.3079	-7.38887	GSE136103	Circulating NK/NKT	0	0	0	0
9856	6.59002	5.10848	GSE136103	Resident NK	0	0	0	0
9878	10.5851	-5.53198	GSE136103	Circulating NK/NKT	0	0	0	0
9913	2.48212	-4.86621	GSE136103	T cells	0	0	0	0
9914	-11.2175	5.65052	GSE136103	MP	0	0	0	0
9926	-0.652426	5.64761	GSE136103	Cholangiocytes	0	0	0	0
9931	7.94022	2.82072	GSE136103	Resident NK	0	0	0	0
9953	-13.1377	3.14036	GSE136103	MP	0	0	1.11474	1.11474
9977	4.60165	5.30556	GSE136103	Resident NK	0	0	0	0
9983	6.2872	5.97077	GSE136103	Resident NK	0	0	0	0
9984	10.5472	-6.60631	GSE136103	Circulating NK/NKT	0	0	0	0
10000	8.66971	3.75604	GSE136103	Resident NK	0	0	0	0
10001	-2.95217	-5.41654	GSE136103	T cells	0	0	0	0
10033	-4.58768	5.4865	GSE136103	MP	0	0	0	0
10048	0.012269	4.99221	GSE136103	Cholangiocytes	0	0	0	0
10050	1.38429	4.77555	GSE136103	Cholangiocytes	0	0	0	0
10053	1.04374	-5.81017	GSE136103	T cells	0	0	0	0
10083	-1.4993	9.94421	GSE136103	Mesenchyme	0	0	0	3.4534
10125	3.73759	11.5403	GSE136103	Endothelial cells	0	0	0	0
10131	-2.31379	-6.42482	GSE136103	T cells	0	0	0	0
10145	2.39252	-5.53014	GSE136103	T cells	0	0	0	0
10146	-1.77816	9.44601	GSE136103	Mesenchyme	0	0	1.48349	0
10164	9.03729	5.14683	GSE136103	Resident NK	0	0	0	0
10169	7.55271	5.51163	GSE136103	Resident NK	0	0	0	0
10175	0.735868	5.03649	GSE136103	Cholangiocytes	0	0	0	0
10181	0.0101961	-8.40284	GSE136103	T cells	0	0	0	0
10201	10.7487	-6.9135	GSE136103	Circulating NK/NKT	0	0	0	0
10221	1.33327	5.01803	GSE136103	Cholangiocytes	0	0	0	0
10241	3.62272	-5.57062	GSE136103	T cells	0	0	0	0
10251	-0.763846	-14.2517	GSE136103	B cells	0	0	0	0
10273	-2.02979	9.39002	GSE136103	Mesenchyme	0	0	0	0
10274	3.09889	-5.88764	GSE136103	T cells	0	0	0	0
10281	-1.57551	9.9008	GSE136103	Mesenchyme	0	0	0	0
10286	-5.276	-3.67506	GSE136103	T cells	0	0	0	0
10288	-1.37749	10.0046	GSE136103	Mesenchyme	0	0	0	0
10320	3.77418	-6.30519	GSE136103	T cells	0	0	0	0
10356	0.393551	-14.2549	GSE136103	B cells	0	0	0	0
10368	-3.0454	-1.64329	GSE136103	T cells	0	0	0	0
10386	1.92835	-6.25963	GSE136103	T cells	0	0	0	0
10424	2.64672	-6.77709	GSE136103	T cells	0	0	0	0
10430	4.1195	15.385	GSE136103	Endothelial cells	0	0	0	0
10439	-9.85605	5.58314	GSE136103	MP	0	0	0	0
10454	11.0533	-6.57733	GSE136103	Circulating NK/NKT	0	0	0	0
10464	9.11372	4.89156	GSE136103	Resident NK	0	0	0	0
10493	7.11793	6.0716	GSE136103	Resident NK	0	0	0	0
10510	-0.623891	-14.4663	GSE136103	B cells	0	0	0	0
10512	-3.9201	-1.81926	GSE136103	T cells	0	0	0	0
10522	-0.488976	5.61087	GSE136103	Cholangiocytes	0	0	0	0
10540	2.03464	-4.67443	GSE136103	T cells	0	0	0	0
10545	9.18025	-7.11261	GSE136103	Circulating NK/NKT	0	0	0	0
10548	-0.476173	8.77883	GSE136103	Mesenchyme	0	0	0	4.38882
10560	4.06126	-5.43567	GSE136103	T cells	0	0	0	0
10572	3.32235	-5.70805	GSE136103	T cells	0	0	0	0
10591	-5.23216	5.90398	GSE136103	MP	0	0	0	0
10617	-12.2298	4.13121	GSE136103	MP	0	0	0	0
10644	1.90538	11.9599	GSE136103	Endothelial cells	0	0	0	0
10659	-0.0353799	-3.27266	GSE136103	Neutrophils	0	0	0	0
10662	-1.11877	5.84514	GSE136103	Cholangiocytes	0	0	0	1.48402
10670	7.57532	4.80111	GSE136103	Resident NK	0	0	0	0
10671	-2.68332	-4.31403	GSE136103	T cells	0	0	0	0
10686	5.6044	5.07083	GSE136103	Resident NK	0	0	0	0
10699	-9.62313	5.41842	GSE136103	MP	0	0	0	0
10713	-0.0901317	5.80215	GSE136103	Cholangiocytes	0	0	0	0
10717	10.4725	-5.85015	GSE136103	Circulating NK/NKT	0	0	0	0
10725	3.31587	-5.82227	GSE136103	T cells	0	0	0	0
10736	-8.75451	-3.01497	GSE136103	Mast cell	0	0	0	0
10737	0.702781	5.36228	GSE136103	Cholangiocytes	0.982394	0	0	0
10739	-2.43604	-4.62666	GSE136103	T cells	0	0	0	0
10807	11.4894	-6.21592	GSE136103	Circulating NK/NKT	0	0	0	0
10811	-0.718742	-6.5311	GSE136103	T cells	0	0	0	0
10826	6.92986	5.65764	GSE136103	Resident NK	0	0	0	2.09526
10838	-2.57735	-7.74113	GSE136103	T cells	0	0	0	0
10847	-1.18305	9.89664	GSE136103	Mesenchyme	0	0	0	2.73228
10872	-1.74633	-7.39535	GSE136103	T cells	0	0	0	0
10873	-3.58991	-2.24223	GSE136103	T cells	0	0	0	0
10884	0.295681	5.10127	GSE136103	Cholangiocytes	0	0	0	0
10892	7.14988	5.9693	GSE136103	Resident NK	0	0	0	0
10893	-1.02154	-7.36007	GSE136103	T cells	0	0	0	0
10921	4.67379	4.81731	GSE136103	Resident NK	0	0	0	0
10926	0.174512	-6.72474	GSE136103	T cells	0	0	0	0
10931	-1.68941	9.66974	GSE136103	Mesenchyme	0	0	0	0
10946	-1.71594	9.7774	GSE136103	Mesenchyme	1.5788	0	0	0
10989	1.07328	4.6271	GSE136103	Cholangiocytes	0	0	0	0
11013	2.48206	-4.37604	GSE136103	T cells	0	0	0	0
11015	9.13468	5.448	GSE136103	Mast cell	0	0	0	0
11029	-5.41596	5.93711	GSE136103	MP	0	0	0	0
11030	3.53505	-4.80587	GSE136103	T cells	0	0	0	0
11037	7.29491	5.30189	GSE136103	Resident NK	0	0	0	0
11040	0.0824658	6.27058	GSE136103	Cholangiocytes	0	0	0	0
11042	-0.636182	10.0021	GSE136103	Mesenchyme	0	0	0	2.58891
11049	1.65381	-4.81325	GSE136103	T cells	0	0	0	0
11059	-4.68565	6.08728	GSE136103	MP	0	0	0	0
11060	0.586567	5.78945	GSE136103	Cholangiocytes	0	0	0	0
11082	5.3258	5.49963	GSE136103	Resident NK	0	0	0	0
11093	-1.98739	9.46814	GSE136103	Mesenchyme	0	0	0	0
11097	-0.542337	-4.66337	GSE136103	T cells	0	0	0	0
11099	-1.82902	-7.8916	GSE136103	T cells	0	0	0	0
11143	0.261245	-5.44944	GSE136103	T cells	0	0	0	2.29622
11152	10.3794	-4.60009	GSE136103	Circulating NK/NKT	0	0	0	0
11154	-6.9631	5.39732	GSE136103	MP	0	0	0	0
11168	0.845584	-4.16779	GSE136103	T cells	0	0	0	0
11174	0.925617	5.0241	GSE136103	Cholangiocytes	0	0	0	0
11210	-3.23494	-4.43733	GSE136103	T cells	0	0	0	0
11227	8.02657	5.32084	GSE136103	Resident NK	0	0	0	0
11240	1.02099	5.32998	GSE136103	Cholangiocytes	0	0	0	0
11249	0.879742	-3.17287	GSE136103	T cells	0	0	0	0
11256	5.41887	4.66401	GSE136103	Resident NK	0	0	0	0
11268	8.81273	4.71181	GSE136103	Resident NK	0	0	0	0
11278	10.9144	-6.88141	GSE136103	Circulating NK/NKT	0	0	0	0
11307	-3.84921	-3.23199	GSE136103	T cells	0	0	0	0
11318	3.15063	-7.09632	GSE136103	T cells	0	0	0	0
11329	0.636232	4.64877	GSE136103	Cholangiocytes	0	0	0	0
11335	9.40546	3.63358	GSE136103	Resident NK	0	0	0	0
11362	-1.93987	9.55846	GSE136103	Mesenchyme	0	0	0	0
11376	-1.69543	9.78859	GSE136103	Mesenchyme	0	0	0	2.65068
11390	-0.569899	9.97867	GSE136103	Mesenchyme	0	0	0	4.13246
11391	7.99857	4.688	GSE136103	Resident NK	0	0	0	0
11420	8.1446	3.5035	GSE136103	Resident NK	0	0	0	0
11423	0.400158	5.72523	GSE136103	Cholangiocytes	0	0	0	0
11445	1.29923	4.8271	GSE136103	Cholangiocytes	0	0	0	0
11461	5.09391	5.55778	GSE136103	Resident NK	0	0	0	0
11484	-0.820973	-6.17836	GSE136103	T cells	0	0	0	0
11508	1.58648	-5.45193	GSE136103	T cells	0	0	0	0
11509	1.48855	3.27892	GSE136103	Cholangiocytes	0	0	0	0
11527	0.197535	-3.78931	GSE136103	Neutrophils	0	0	0	0
11528	10.5228	-5.74711	GSE136103	Circulating NK/NKT	0	0	0	0
11536	0.396182	-5.31935	GSE136103	T cells	0	0	0	0
11568	10.0136	-4.76804	GSE136103	Circulating NK/NKT	0	0	0	0
11572	-3.11966	-4.84744	GSE136103	T cells	0	0	0	0
11627	0.997763	-13.8567	GSE136103	B cells	0	0	0	0
11634	0.0125325	4.65081	GSE136103	Cholangiocytes	0	0	0	0
11648	-0.268937	9.0871	GSE136103	Mesenchyme	0	0	0	4.42748
11697	-1.018	5.50192	GSE136103	Cholangiocytes	0	0	0	0
11705	11.2198	-6.66903	GSE136103	Circulating NK/NKT	0	0	0	2.32818
11738	-0.234563	9.02119	GSE136103	Mesenchyme	0	0	0	3.86611
11754	-1.19348	9.97238	GSE136103	Mesenchyme	0	0	0	0
11757	-3.29891	-4.64919	GSE136103	T cells	0	2.2803	0	0
11768	2.928	-6.3941	GSE136103	T cells	0	0	0	0
11786	-1.39841	-5.80967	GSE136103	T cells	0	0	0	0
11806	0.64717	5.78159	GSE136103	Cholangiocytes	0	0	0	0
11822	-9.53934	5.36989	GSE136103	MP	0	0	0	0
11828	-0.881029	-6.86611	GSE136103	T cells	0	0	0	0
11861	-2.88062	-3.24951	GSE136103	T cells	0	0	0	0
11863	2.34406	-6.62074	GSE136103	T cells	0	0	0	0
11868	-1.57461	9.74765	GSE136103	Mesenchyme	0	0	0	0
11912	7.64666	5.56422	GSE136103	Resident NK	0	0	0	0
11932	-9.16239	-10.5225	GSE136103	Plasma cells	0	0	0	0
11940	0.901694	5.16314	GSE136103	Cholangiocytes	0	0	0	0
11945	-1.49109	9.97726	GSE136103	Mesenchyme	0	0	0	0
11947	0.428573	5.44545	GSE136103	Cholangiocytes	0	0	0	0
11959	7.7797	5.62641	GSE136103	Resident NK	0	0	0	0
11991	1.77975	0.339351	GSE136103	Hepatocytes	0	0	0	0
12010	9.39185	-4.92751	GSE136103	Circulating NK/NKT	0	0	0	0
12034	1.48888	3.77465	GSE136103	Cholangiocytes	0	0	0	0
12037	-0.232607	-4.19526	GSE136103	Neutrophils	0	0	0	0
12045	2.19773	-3.74747	GSE136103	T cells	0	0	0	0
12077	-1.95042	9.55325	GSE136103	Mesenchyme	0	0	0	0
12083	6.30059	5.58943	GSE136103	Resident NK	0	0	0	0
12093	-1.59159	-3.59936	GSE136103	T cells	0	0	0	0
12101	8.11477	4.29319	GSE136103	Resident NK	0	0	0	0
12133	-5.67703	4.98326	GSE136103	MP	0	0	0	0
12138	0.767212	-14.2709	GSE136103	B cells	0	0	0	0
12140	-1.86892	9.52366	GSE136103	Mesenchyme	0	0	0	0
12142	4.89888	5.44936	GSE136103	Resident NK	0	0	0	0
12150	0.433314	5.62163	GSE136103	Cholangiocytes	0	0	0	0
12163	-6.44183	5.71467	GSE136103	MP	0	0	0	0
12187	-1.38635	-5.66842	GSE136103	T cells	0	0	0	0
12188	-3.34955	-3.19024	GSE136103	T cells	0	0	0	0
12189	-0.291505	5.20679	GSE136103	Cholangiocytes	0	0	0	0
12196	-4.28248	-1.87808	GSE136103	T cells	0	0	0	0
12197	11.3745	-6.48741	GSE136103	Circulating NK/NKT	0	0	0	0
12206	-5.151	-2.91889	GSE136103	T cells	0	0	0	0
12223	0.23561	6.7277	GSE136103	Cholangiocytes	0	0	0	0
12232	3.4332	-6.0088	GSE136103	T cells	0	0	0	0
12234	0.445931	-7.74078	GSE136103	T cells	0	0	0	0
12240	0.255572	-14.0459	GSE136103	B cells	0	0	0	0
12245	7.08528	5.32176	GSE136103	Resident NK	0	0	0	0
12269	3.56464	-5.45883	GSE136103	T cells	0	0	0	0
12322	10.4662	-6.5718	GSE136103	Circulating NK/NKT	0	0	0	0
12333	-4.91067	5.93556	GSE136103	MP	0	0	0	0
12395	3.75051	-4.87411	GSE136103	T cells	0	0	0	0
12410	1.62436	8.6891	GSE136103	Endothelial cells	0	2.01912	2.01912	0
12414	1.73945	11.7548	GSE136103	Endothelial cells	0	0	0	0
12440	-4.97625	5.81404	GSE136103	MP	0	0	0	0
12457	3.05072	-5.36979	GSE136103	T cells	0	0	0	0
12474	-1.05172	9.86802	GSE136103	Mesenchyme	0	0	0	3.04167
12515	2.06087	-5.42381	GSE136103	T cells	0	0	0	0
12520	-0.433487	9.53736	GSE136103	Mesenchyme	0	0	0	3.27753
12524	-0.432886	9.8471	GSE136103	Mesenchyme	0	0	0	3.27202
12555	1.56107	4.16842	GSE136103	Cholangiocytes	0	0	0	0
12568	-10.5555	7.59651	GSE136103	MP	0	0	0	0
12582	3.88987	-6.39726	GSE136103	T cells	0	0	0	0
12607	3.56408	-5.28655	GSE136103	T cells	0	0	0	0
12608	-11.9751	-5.25141	GSE136103	pDCs	0	0	0	0
12613	-0.0908511	4.78679	GSE136103	Cholangiocytes	0	0	0	0
12649	0.975204	-13.913	GSE136103	B cells	0	0	0	0
12673	-3.41833	-4.41168	GSE136103	T cells	0	0	0	1.80564
12684	-5.37566	5.08595	GSE136103	MP	0	0	0	0
12700	7.09813	5.1077	GSE136103	Resident NK	0	0	0	0
12733	2.9678	-6.89809	GSE136103	T cells	0	0	0	0
12741	6.63234	5.55164	GSE136103	Resident NK	0	0	0	0
12767	0.184336	3.64058	GSE136103	Cholangiocytes	0	0	0	0
12769	-12.7869	3.04212	GSE136103	MP	0	0	0	1.36711
12793	-7.58893	11.2651	GSE136103	MP	0	0	0	0
12844	3.59459	-6.13746	GSE136103	T cells	0	0	0	0
12864	1.3007	4.51023	GSE136103	Cholangiocytes	0	0	0	0
12866	10.9126	-6.25705	GSE136103	Circulating NK/NKT	0	0	0	0
12888	2.86474	-5.48999	GSE136103	T cells	0	0	0	0
12901	-0.688232	9.98741	GSE136103	Mesenchyme	0	0	0	3.53652
12906	-0.269731	9.49871	GSE136103	Mesenchyme	0	0	0	4.10825
12954	-0.434142	-7.72994	GSE136103	T cells	0	0	0	0
12956	6.46867	6.06632	GSE136103	Resident NK	0	0	0	0
12996	3.68747	-6.0941	GSE136103	T cells	0	0	0	0
13008	-12.5385	2.96883	GSE136103	MP	0	0	0	0
13011	10.7347	-4.28547	GSE136103	Circulating NK/NKT	0	0	0	0
13013	-0.135309	9.14588	GSE136103	Mesenchyme	0	0	0	4.94012
13042	8.47521	4.85467	GSE136103	Resident NK	0	0	0	0
13058	-0.844992	10.1191	GSE136103	Mesenchyme	0	0	0	2.88077
13079	-2.79787	-3.81554	GSE136103	T cells	0	0	0	0
13083	-3.12052	-7.13134	GSE136103	T cells	0	0	0	0
13108	-2.07097	-4.59448	GSE136103	T cells	0	0	0	0
13110	9.6893	-4.82719	GSE136103	Circulating NK/NKT	0	0	0	0
13111	3.32323	-5.78765	GSE136103	T cells	0	0	0	0
13119	11.1781	-6.30457	GSE136103	Circulating NK/NKT	0	0	0	0
13121	1.8846	-3.65799	GSE136103	T cells	0	0	0	0
13123	3.37763	-6.77523	GSE136103	T cells	0	0	0	2.38706
13144	2.92905	-6.58067	GSE136103	T cells	0	0	0	0
13152	-0.208325	9.31321	GSE136103	Mesenchyme	0	1.66931	0	5.27239
13163	2.25638	-3.60352	GSE136103	T cells	0	0	0	0
13170	-5.48291	5.19899	GSE136103	MP	0	0	0	0
13183	5.38566	5.21215	GSE136103	Resident NK	0	0	0	0
13197	7.77667	5.55269	GSE136103	Resident NK	0	0	0	0
13208	-1.26261	10.05	GSE136103	Mesenchyme	0	0	0	2.61905
13209	5.44332	-3.5795	GSE136103	T cells	0	0	0	0
13250	-2.74332	-3.97237	GSE136103	T cells	0	0	0	0
13278	0.136664	6.73219	GSE136103	Cholangiocytes	0	0	0	0
13284	3.0705	-7.25328	GSE136103	T cells	0	0	0	2.20796
13296	-5.56074	-3.33794	GSE136103	T cells	0	0	0	0
13298	1.29669	4.72743	GSE136103	Cholangiocytes	0	0	0	0
13312	-1.36035	-5.7129	GSE136103	T cells	0	0	0	0
13326	-0.672357	-14.44	GSE136103	B cells	0	0	0	0
13362	-6.26701	5.55328	GSE136103	MP	0	0	0	0
13368	-0.0700021	5.22914	GSE136103	Cholangiocytes	0	0	0	0
13374	-0.208867	9.42112	GSE136103	Mesenchyme	0	0	0	4.56683
13401	-0.527216	-5.62055	GSE136103	T cells	0	0	0	0
13408	-1.5007	-3.70738	GSE136103	T cells	0	0	0	0
13420	9.54626	-3.91854	GSE136103	T cells	0	0	0	0
13426	-0.432879	5.86352	GSE136103	Cholangiocytes	0	0	0	0
13428	1.29801	4.22655	GSE136103	Cholangiocytes	0	0	0	0
13431	0.0669978	4.8977	GSE136103	Cholangiocytes	0	0	0	0
13441	-9.90164	1.34105	GSE136103	MP	0	0	0	0
13444	0.798982	5.20017	GSE136103	Cholangiocytes	0	0	0	0
13451	2.763	-4.83371	GSE136103	T cells	0	0	0	0
13454	3.12385	-6.60528	GSE136103	T cells	0	0	0	0
13457	7.68933	5.42364	GSE136103	Resident NK	0	0	0	0
13460	7.03758	5.14152	GSE136103	Resident NK	0	0	0	0
13466	9.01379	4.81767	GSE136103	Resident NK	0	0	0	0
13493	7.88908	5.47805	GSE136103	Resident NK	0	0	0	0
13496	-0.628058	10.0025	GSE136103	Mesenchyme	0	0	0	4.60184
13500	-1.01467	-3.37679	GSE136103	T cells	0	0	0	2.68903
13517	-0.708292	-5.4757	GSE136103	T cells	0	0	0	2.72959
13536	8.22981	4.82747	GSE136103	Resident NK	0	0	0	0
13538	-4.31029	-3.59291	GSE136103	T cells	0	0	0	0
13553	0.00231931	-8.22193	GSE136103	B cells	0	0	0	0
13557	-5.13889	-3.79973	GSE136103	T cells	0	0	0	0
13566	-1.0822	9.95633	GSE136103	Mesenchyme	0	0	1.46865	2.0395
13602	1.15445	8.6877	GSE136103	Mesenchyme	0	0	0	0
13625	-1.02064	-14.1765	GSE136103	B cells	0	0	0	0
13629	-2.53429	-2.79093	GSE136103	T cells	0	0	0	0
13632	0.454089	-4.66678	GSE136103	Neutrophils	0	0	0	0
13690	1.60232	-5.0184	GSE136103	T cells	0	0	0	0
13692	-11.5374	5.24274	GSE136103	MP	0	0	0	0
13696	1.40382	3.23151	GSE136103	Hepatocytes	0	0	0	0
13719	-4.47502	-2.25835	GSE136103	T cells	0	0	0	0
13722	3.69898	-6.93559	GSE136103	T cells	0	0	0	0
13736	2.64852	-6.5525	GSE136103	T cells	0	0	0	0
13755	8.48758	6.19079	GSE136103	Resident NK	0	0	0	0
13778	0.231402	4.80582	GSE136103	Cholangiocytes	0	0	0	0
13782	0.0735648	-2.29142	GSE136103	Hepatocytes	0	0	0	0
13796	0.0249456	6.17632	GSE136103	Cholangiocytes	0	0	0	0
13804	0.313892	6.78797	GSE136103	Cholangiocytes	0	0	0	0
13836	2.79444	-6.74578	GSE136103	T cells	0	0	0	0
13846	-1.90839	9.50769	GSE136103	Mesenchyme	0	0	0	0
13868	-4.8582	-3.44922	GSE136103	T cells	0	0	0	1.95245
13873	-1.61353	-5.38846	GSE136103	T cells	0	0	0	0
13877	-7.63099	4.28536	GSE136103	MP	0	0	0	0
13885	7.41489	3.05166	GSE136103	Resident NK	0	0	0	0
13895	10.74	-5.58398	GSE136103	Circulating NK/NKT	0	0	0	0
13913	-0.046538	4.68065	GSE136103	Cholangiocytes	0	0	0	0
13924	-0.888253	10.017	GSE136103	Mesenchyme	0	0	0	2.33321
13928	-1.95388	-8.16969	GSE136103	T cells	0	0	0	0
13985	6.32575	6.11055	GSE136103	Resident NK	0	0	0	0
13995	3.53092	-5.28681	GSE136103	T cells	0	0	0	0
14003	10.7557	-4.11697	GSE136103	Circulating NK/NKT	0	0	0	0
14009	-1.66118	9.55675	GSE136103	Mesenchyme	0	0	1.84988	0
14018	0.226358	-5.25077	GSE136103	T cells	0	0	0	0
14049	0.732181	4.82917	GSE136103	Cholangiocytes	0	0	0	0
14053	0.538515	4.99203	GSE136103	Cholangiocytes	0	0	0	0
14064	0.215974	-4.42763	GSE136103	Neutrophils	0	0	0	3.83183
14075	1.25716	5.14601	GSE136103	Cholangiocytes	0	0	0	0
14078	-10.2218	6.01349	GSE136103	MP	0	0	0	0
14096	4.41172	12.6532	GSE136103	Endothelial cells	0	2.13369	0	0
14104	-3.25464	-2.76673	GSE136103	T cells	0	0	0	0
14120	-0.544871	-8.3963	GSE136103	T cells	0	0	0	0
14139	-9.0561	-10.6022	GSE136103	Plasma cells	0	0	0	0
14141	-1.81057	-7.62054	GSE136103	T cells	0	0	0	0
14145	-0.225695	9.31983	GSE136103	Mesenchyme	0	0	0	3.61214
14155	0.980156	4.8553	GSE136103	Cholangiocytes	0	0	0	0
14156	-2.33094	-5.19295	GSE136103	T cells	0	0	0	0
14157	-12.6447	3.18221	GSE136103	MP	0	0	0	0
14158	-4.40949	-1.09486	GSE136103	T cells	0	0	0	0
14198	5.92893	5.91198	GSE136103	Resident NK	0	0	0	0
14201	-5.25772	-2.68823	GSE136103	T cells	0	0	0	0
14213	-6.11734	5.05499	GSE136103	MP	0	0	0	0
14219	-5.4983	-2.38439	GSE136103	T cells	1.99131	0	0	0
14229	-0.703917	-7.00364	GSE136103	T cells	0	0	0	0
14311	-1.19018	-4.62925	GSE136103	T cells	0	0	0	0
14312	9.03053	4.05333	GSE136103	Resident NK	0	0	0	0
14350	1.83988	12.0789	GSE136103	Endothelial cells	0	0	0	0
14356	-0.157405	-4.20662	GSE136103	Neutrophils	0	0	0	3.77648
14387	-0.634309	9.97324	GSE136103	Mesenchyme	0	0	0	0
14409	0.725661	4.399	GSE136103	Cholangiocytes	0	0	0	0
14414	-4.38691	-2.53178	GSE136103	T cells	0	0	0	0
14417	5.30529	5.9457	GSE136103	Resident NK	0	0	0	0
14438	3.95278	-5.45844	GSE136103	T cells	0	0	0	0
14448	-4.21012	-2.31985	GSE136103	T cells	0	0	0	0
14462	6.5345	4.94323	GSE136103	Resident NK	0	0	0	0
14464	-7.28349	3.42172	GSE136103	MP	0	0	0	0
14488	2.33071	-6.94658	GSE136103	T cells	0	0	0	0
14491	0.563113	8.87697	GSE136103	Mesenchyme	0	0	2.20222	3.22427
14501	-0.635279	5.71247	GSE136103	Cholangiocytes	0	0	0	0
14528	-1.001	-7.02135	GSE136103	T cells	0	0	0	0
14532	2.91862	-6.71327	GSE136103	T cells	0	0	0	0
14537	0.154741	-6.73049	GSE136103	T cells	0	0	0	0
14539	-0.8261	-2.77485	GSE136103	Neutrophils	0	0	0	3.90404
14544	6.38947	-2.63844	GSE136103	T cells	0	0	0	0
14583	1.46226	0.958952	GSE136103	Hepatocytes	0	0	0	1.5365
14595	7.19959	5.90482	GSE136103	Resident NK	0	0	0	0
14596	-0.178285	9.19716	GSE136103	Mesenchyme	0	0	1.59394	4.67212
14624	-1.01881	10.1035	GSE136103	Mesenchyme	0	0	0	1.85259
14625	3.55295	-3.97711	GSE136103	T cells	0	0	0	0
14641	8.04645	-3.83405	GSE136103	T cells	0	0	0	0
14652	1.35979	8.53666	GSE136103	Mesenchyme	0	1.72919	3.18554	0
14668	0.0962605	-3.9876	GSE136103	Mesenchyme	0	0	0	3.8136
14671	-0.475901	9.94668	GSE136103	Mesenchyme	0	0	0	4.46504
14715	-1.76014	9.34788	GSE136103	Mesenchyme	0	0	0	0
14717	4.70579	5.59989	GSE136103	Resident NK	0	0	0	0
14729	0.213524	5.71656	GSE136103	Cholangiocytes	0	0	0	0.911162
14740	0.503213	5.05888	GSE136103	Cholangiocytes	0	0	0	0
14748	8.95321	4.04554	GSE136103	Resident NK	0	0	0	0
14749	7.27472	5.47295	GSE136103	Resident NK	0	0	0	0
14752	11.437	-5.66887	GSE136103	Circulating NK/NKT	0	0	0	0
14762	-4.09604	-2.52799	GSE136103	T cells	0	0	0	0
14770	-1.32513	-4.25433	GSE136103	T cells	0	0	0	0
14783	-9.82434	6.25674	GSE136103	MP	0	0	0	0
14789	-0.157257	5.90641	GSE136103	Cholangiocytes	0	0	0	0
14816	1.57572	4.03215	GSE136103	Cholangiocytes	0	0	0	0
14841	6.608	-3.0072	GSE136103	T cells	0	0	0	0
14870	3.23098	-6.6936	GSE136103	T cells	0	0	0	0
14875	-2.72756	-1.96011	GSE136103	T cells	0	0	0	0
14885	-4.96931	-3.0991	GSE136103	T cells	0	0	0	0
14919	-10.1724	5.65594	GSE136103	MP	0	0	0	0
14941	6.59417	5.36843	GSE136103	Resident NK	0	0	0	0
14954	-0.811566	10.0276	GSE136103	Mesenchyme	0	0	0	3.47222
14965	-0.150451	-14.58	GSE136103	B cells	0	0	0	0
14968	-0.199833	9.24798	GSE136103	Mesenchyme	0	0	0	4.20219
14987	-1.02144	-7.55999	GSE136103	T cells	0	0	0	0
14992	11.3992	-6.08401	GSE136103	Circulating NK/NKT	0	0	0	0
14998	-1.90105	9.30545	GSE136103	Mesenchyme	0	0	0	0
15012	-3.88269	-3.63033	GSE136103	T cells	0	0	0	0
15024	-0.247316	9.54053	GSE136103	Mesenchyme	0	0	0	4.7295
15033	0.469025	5.67649	GSE136103	Cholangiocytes	0	0	0.663934	0.663934
15044	6.15998	5.74123	GSE136103	Resident NK	0	0	0	0
15071	3.22909	-5.153	GSE136103	T cells	0	0	0	0
15076	-5.23971	-2.97456	GSE136103	T cells	0	0	0	0
15080	-1.79696	9.55517	GSE136103	Mesenchyme	0	0	0	0
15097	2.53664	-3.90172	GSE136103	T cells	2.98821	0	0	0
15099	-1.6184	9.28506	GSE136103	Mesenchyme	0	0	0	0
15106	0.368457	-6.79277	GSE136103	T cells	0	0	0	0
15124	0.933274	-2.64097	GSE136103	T cells	0	0	0	0
15126	-1.31845	10.0055	GSE136103	Mesenchyme	0	0	1.89314	3.55079
15128	8.44134	4.848	GSE136103	Resident NK	0	0	0	0
15129	1.77601	12.0839	GSE136103	Endothelial cells	0	0	0	0
15144	9.09204	4.73319	GSE136103	Resident NK	0	0	0	0
15146	0.409262	5.43014	GSE136103	Cholangiocytes	1.71149	0	0	0
15149	-0.299708	9.19402	GSE136103	Mesenchyme	0	0	0	4.23618
15151	10.9881	-7.34177	GSE136103	Circulating NK/NKT	0	0	0	0
15205	-1.84122	9.60974	GSE136103	Mesenchyme	0	0	0	2.31451
15207	10.6417	-4.84074	GSE136103	Circulating NK/NKT	0	0	0	0
15216	4.06502	-5.12051	GSE136103	T cells	0	0	0	0
15225	5.99943	6.00198	GSE136103	Resident NK	0	0	0	0
15249	5.55941	10.0887	GSE136103	Endothelial cells	0	0	0	0
15270	-5.06165	5.44934	GSE136103	MP	0	0	0	0
15299	-1.46635	9.96587	GSE136103	Mesenchyme	0	0	0	1.28115
15310	-2.99432	-4.27262	GSE136103	T cells	0	0	0	0
15318	0.346713	4.90403	GSE136103	Cholangiocytes	0	0	0	0
15328	-0.233152	-14.1098	GSE136103	B cells	0	0	0	0
15350	0.841476	5.14718	GSE136103	Cholangiocytes	0	0	0	0.988498
15357	-1.35779	-6.64344	GSE136103	T cells	0	0	0	2.00509
15358	-4.02597	1.87028	GSE136103	Basophils	0	0	0	0
15393	-1.8894	-3.58527	GSE136103	T cells	0	0	0	0
15429	-12.7919	3.57669	GSE136103	MP	1.06386	0	0	0
15441	7.8527	5.50808	GSE136103	Resident NK	0	0	0	0
15442	9.3221	4.39001	GSE136103	Resident NK	0	0	0	0
15456	6.17119	5.70245	GSE136103	Resident NK	0	0	0	0
15457	-2.09202	-5.27275	GSE136103	T cells	0	0	0	0
15461	-9.95964	5.5381	GSE136103	MP	0	0	0	1.3384
15480	10.6129	-7.11768	GSE136103	Circulating NK/NKT	0	0	1.77042	0
15505	-0.733603	9.98185	GSE136103	Mesenchyme	0	0	1.75324	3.78327
15530	-1.85378	-7.40203	GSE136103	T cells	0	0	0	0
15548	-2.63089	-4.2597	GSE136103	T cells	0	0	0	0
15549	-4.58336	-3.90181	GSE136103	T cells	0	0	0	0
15577	-0.37088	9.78451	GSE136103	Mesenchyme	0	0	0	4.24755
15599	-1.42736	-6.93089	GSE136103	T cells	0	0	0	0
15603	-0.164589	-14.1923	GSE136103	B cells	0	0	0	0
15606	-1.95689	9.50973	GSE136103	Mesenchyme	0	0	0	0
15610	-1.10173	5.79876	GSE136103	Cholangiocytes	0	0	0	0
15617	0.0625792	5.73344	GSE136103	Cholangiocytes	0	0	0	0
15644	1.41744	2.49834	GSE136103	Cholangiocytes	1.61555	0	0	0
15706	-0.930631	10.1267	GSE136103	Mesenchyme	0	0	1.2492	1.2492
15708	10.3299	-4.98099	GSE136103	Circulating NK/NKT	0	0	0	0
15717	8.28451	5.19351	GSE136103	Resident NK	0	0	0	0
15719	-4.10898	-1.89232	GSE136103	T cells	0	0	0	0
15725	2.24432	10.9224	GSE136103	Endothelial cells	0	0	0	0
15752	-3.94214	-2.57573	GSE136103	T cells	0	0	0	0
15755	-11.6721	-5.02957	GSE136103	pDCs	1.71634	0	0	0
15771	11.6704	-6.36676	GSE136103	Circulating NK/NKT	0	0	0	0
15772	-5.06706	-1.58566	GSE136103	T cells	0	0	0	0
15775	-1.93947	-5.60468	GSE136103	T cells	0	0	0	0
15781	9.31196	4.24656	GSE136103	Resident NK	0	0	0	0
15793	-1.02747	-2.70035	GSE136103	Neutrophils	0	0	0	0
15800	-0.632471	10.0551	GSE136103	Mesenchyme	0	0	0	4.14695
15802	0.504137	4.32071	GSE136103	Cholangiocytes	0	0	0	0
15803	0.180986	-7.06302	GSE136103	T cells	0	0	0	0
15810	8.29598	4.98449	GSE136103	Resident NK	0	0	0	2.47897
15814	2.78984	-6.177	GSE136103	T cells	2.28584	0	0	0
15815	2.85499	-5.33481	GSE136103	T cells	0	0	0	0
15821	-1.96423	-3.88523	GSE136103	T cells	0	0	0	0
15823	-7.38161	4.42171	GSE136103	MP	0	0	0	0
15831	0.0247756	5.08622	GSE136103	Cholangiocytes	0	0	0	0
15842	-12.8745	3.62531	GSE136103	MP	0	0	0	0
15847	0.00364484	-6.74907	GSE136103	Neutrophils	0	0	0	0
15849	2.7301	-6.93147	GSE136103	T cells	0	0	0	0
15860	11.0759	-6.9317	GSE136103	Circulating NK/NKT	0	0	0	0
15878	0.374299	5.4632	GSE136103	Cholangiocytes	1.71859	0	0	0
15883	2.75635	-6.43925	GSE136103	T cells	0	0	0	0
15911	-1.40425	9.79621	GSE136103	Mesenchyme	0	0	0	2.27324
15916	-1.83937	-5.80693	GSE136103	T cells	0	0	0	0
15918	1.32453	4.7582	GSE136103	Cholangiocytes	0	0	0	0
15929	-12.8145	3.08057	GSE136103	MP	0	0	0	0
15957	1.13429	-4.07076	GSE136103	T cells	0	0	0	0
15976	0.109053	6.42735	GSE136103	Cholangiocytes	0	0	0	0
15995	0.784657	5.5229	GSE136103	Cholangiocytes	0	0	0	0
15997	-0.250208	9.12634	GSE136103	Mesenchyme	0	0	0	4.97814
16011	-0.0852105	3.99521	GSE136103	Cholangiocytes	0	0	0	0
16015	1.94365	8.11811	GSE136103	Mesenchyme	0	0	0	0
16021	1.60918	4.48872	GSE136103	Cholangiocytes	0	0	0	0
16033	6.7989	5.18087	GSE136103	Resident NK	0	0	0	0
16040	8.45945	3.5808	GSE136103	Resident NK	0	0	0	0
16074	-0.841856	13.3723	GSE136103	Mesenchyme	0	0	0	0
16123	-4.37067	-1.84608	GSE136103	T cells	0	0	0	0
16139	8.898	3.60955	GSE136103	Resident NK	0	0	0	0
16173	-7.21202	-0.417131	GSE136103	Mast cell	0	0	0	0
16185	6.17134	5.01528	GSE136103	Resident NK	0	0	0	0
16191	-10.5028	6.22826	GSE136103	MP	0	0	0	0
16219	-11.1819	3.65476	GSE136103	MP	0	0	0	0
16220	-7.22173	-0.461582	GSE136103	Mast cell	0	0	0	0
16221	-3.95554	-2.57689	GSE136103	T cells	0	0	0	0
16224	3.08076	-6.11494	GSE136103	T cells	0	0	0	0
16225	-1.6917	-6.75143	GSE136103	T cells	0	0	0	0
16226	0.592495	4.89421	GSE136103	Cholangiocytes	0	0	0	0
16236	0.395266	6.8157	GSE136103	Cholangiocytes	0	0	0	0
16248	-5.51546	-2.51124	GSE136103	T cells	0	0	0	0
16255	-4.33193	5.69799	GSE136103	MP	0	0	0	0
16280	1.02971	4.61429	GSE136103	Cholangiocytes	0	0	0	0
16285	-0.686858	4.97016	GSE136103	Cholangiocytes	0	0	0	0
16299	0.917574	5.27924	GSE136103	Cholangiocytes	0	0	0	0
16310	-0.333228	6.06214	GSE136103	Cholangiocytes	0	0	0	0
16315	-2.08681	-7.13542	GSE136103	T cells	0	0	0	0
16337	-2.66255	-7.44769	GSE136103	T cells	0	0	0	0
16380	-4.69823	-3.84481	GSE136103	T cells	0	0	0	0
16381	0.00183512	5.63772	GSE136103	Cholangiocytes	0	0	0	0
16385	-0.430124	9.79876	GSE136103	Mesenchyme	0	0	0	3.26776
16426	0.106338	-3.54039	GSE136103	Neutrophils	0	0	0	0
16436	-3.20581	-2.14682	GSE136103	T cells	0	0	0	0
16458	0.198062	5.41862	GSE136103	Cholangiocytes	0	0	0	0
16482	6.76792	5.80786	GSE136103	Resident NK	0	0	0	0
16496	-0.178168	9.19773	GSE136103	Mesenchyme	0	0	0	3.85984
16498	-0.108636	-5.51634	GSE136103	T cells	0	0	0	0
16511	7.70652	5.7002	GSE136103	Resident NK	0	0	0	0
16519	-2.0823	-2.83	GSE136103	T cells	0	0	0	0
16532	-10.3551	5.94294	GSE136103	MP	0	0	0	0
16548	-1.83425	9.62744	GSE136103	Mesenchyme	1.79009	0	0	1.79009
16557	8.74858	4.28164	GSE136103	Resident NK	0	0	0	0
16569	2.04621	12.0031	GSE136103	Endothelial cells	0	0	0	0
16575	-7.32765	11.1321	GSE136103	MP	0	0	0	0
16585	-7.66517	12.1464	GSE136103	MP	0	0	0	0
16589	7.29322	4.9625	GSE136103	Resident NK	0	0	0	0
16592	3.75032	-4.36304	GSE136103	T cells	0	0	0	0
16623	6.97143	5.34873	GSE136103	Resident NK	0	0	0	0
16640	8.1164	5.50975	GSE136103	Resident NK	0	0	0	0
16661	0.303469	5.01397	GSE136103	Cholangiocytes	0	0	0	0
16666	-0.635218	9.2787	GSE136103	Mesenchyme	0	0	0	4.29501
16688	6.47819	4.87907	GSE136103	Resident NK	0	0	0	0
16690	-0.502752	9.89612	GSE136103	Mesenchyme	0	0	0	4.40904
16707	8.88537	5.09078	GSE136103	Resident NK	0	0	0	0
16708	7.65012	3.52405	GSE136103	Resident NK	0	0	0	0
16711	-1.41673	-6.9258	GSE136103	T cells	0	0	0	0
16716	-1.97191	-6.56626	GSE136103	T cells	0	0	0	0
16720	-3.43001	-4.24513	GSE136103	T cells	0	0	0	0
16725	1.80107	-5.36599	GSE136103	T cells	0	0	0	0
16727	-0.983802	9.88054	GSE136103	Mesenchyme	0	0	0	0
16736	-7.17565	4.39959	GSE136103	MP	0	0	0	0
16740	-5.80033	5.52613	GSE136103	MP	0	0	0	0
16745	-2.00027	-2.76041	GSE136103	T cells	0	0	0	0
16756	-2.15856	-7.97551	GSE136103	T cells	0	0	0	0
16758	-1.95788	9.41404	GSE136103	Mesenchyme	0	0	0	0
16760	-7.88165	3.98872	GSE136103	MP	0	0	0	0
16790	-3.20151	-1.29778	GSE136103	T cells	0	0	0	0
16805	-1.12281	10.1825	GSE136103	Mesenchyme	0	0	0	0
16816	0.193681	4.98253	GSE136103	Cholangiocytes	0	0	0	0
16817	0.0731242	-6.79284	GSE136103	T cells	0	0	0	0
16824	-0.246587	-7.74193	GSE136103	T cells	0	0	0	0
16828	8.39599	4.23091	GSE136103	Resident NK	0	0	0	0
16833	-0.209855	9.14783	GSE136103	Mesenchyme	0	0	0	3.43399
16846	2.20848	-6.43038	GSE136103	T cells	0	0	0	0
16882	1.12936	4.74926	GSE136103	Cholangiocytes	0	0	0	0
16883	-3.17883	-2.81809	GSE136103	T cells	0	0	0	0
16892	-5.43887	3.96451	GSE136103	MP	0	0	0	0
16897	-2.7394	-4.462	GSE136103	T cells	0	0	0	0
16904	-2.54756	-5.40758	GSE136103	T cells	0	0	0	0
16936	2.57373	-4.42395	GSE136103	T cells	0	0	0	0
16947	7.1289	5.75785	GSE136103	Resident NK	0	0	0	0
16962	4.93795	14.0878	GSE136103	Endothelial cells	0	0	0	0
16974	1.91022	11.6514	GSE136103	Endothelial cells	0	0	0	0
16975	8.86166	4.74356	GSE136103	Resident NK	0	0	0	2.49209
16999	-8.62073	2.66588	GSE136103	MP	0	0	0	0
17003	-2.65875	-4.21934	GSE136103	T cells	0	2.20868	0	0
17034	5.17671	5.53214	GSE136103	Resident NK	0	0	0	0
17040	11.4148	-5.62497	GSE136103	Circulating NK/NKT	0	0	0	0
17044	-1.70516	-4.79226	GSE136103	T cells	0	0	0	0
17064	2.34066	-7.09419	GSE136103	T cells	0	0	0	0
17096	-9.25099	-10.614	GSE136103	Plasma cells	0	0	0	0
17110	-1.87136	-3.22939	GSE136103	T cells	0	0	0	0
17119	-1.27483	10.034	GSE136103	Mesenchyme	0	0	0	2.65764
17127	0.161816	5.40051	GSE136103	Cholangiocytes	0	0	0	0
17156	3.04564	11.6467	GSE136103	Endothelial cells	0	0	0	0
17176	0.3923	-4.30552	GSE136103	Neutrophils	0	0	0	2.4582
17198	0.293287	-5.25047	GSE136103	Neutrophils	0	0	0	0
17204	-3.21349	-1.4261	GSE136103	T cells	0	0	0	0
17225	3.15479	-6.97092	GSE136103	T cells	0	0	0	0
17229	0.713148	5.14173	GSE136103	Cholangiocytes	0	0	0	0
17248	-3.97997	-2.73378	GSE136103	T cells	0	0	0	0
17256	1.12408	4.56637	GSE136103	Cholangiocytes	0	0	0	0
17258	7.53604	5.54681	GSE136103	Resident NK	0	0	0	0
17262	-1.60342	-14.0326	GSE136103	B cells	0	0	0	0
17266	6.39435	3.54008	GSE136103	Resident NK	0	0	0	0
17278	-1.83979	9.60902	GSE136103	Mesenchyme	0	0	0	0
17290	4.1946	-5.79079	GSE136103	T cells	0	0	0	2.34507
17299	-1.44509	-4.989	GSE136103	T cells	0	0	0	0
17302	-0.619292	6.0219	GSE136103	Cholangiocytes	0	0	0	0
17327	-1.7446	9.63765	GSE136103	Mesenchyme	1.72766	0	0	0
17337	2.37215	-5.58988	GSE136103	T cells	0	0	0	0
17384	1.19565	-3.17915	GSE136103	T cells	0	0	0	0
17386	3.93719	-5.12688	GSE136103	T cells	0	0	0	0
17387	-5.64287	-3.55024	GSE136103	T cells	0	0	0	0
17393	-0.651639	-3.23644	GSE136103	Neutrophils	0	0	0	2.52105
17410	4.30771	-6.12929	GSE136103	T cells	0	0	0	0
17443	0.183456	6.23108	GSE136103	Cholangiocytes	0	0	0	0
17445	-0.857392	-3.37438	GSE136103	Neutrophils	0	0	0	3.10863
17460	-4.14633	-2.94857	GSE136103	T cells	0	0	0	0
17472	-12.1407	3.0259	GSE136103	MP	0	0	0	1.17407
17488	-1.8609	9.36835	GSE136103	Mesenchyme	0	0	0	1.92595
17489	-1.25578	9.96382	GSE136103	Mesenchyme	0	0	0	2.01123
17494	7.52141	5.12427	GSE136103	Resident NK	0	0	0	0
17504	2.69045	-5.16759	GSE136103	T cells	0	0	0	0
17512	-1.17737	-3.49907	GSE136103	T cells	0	0	0	0
17513	2.48603	-6.78033	GSE136103	T cells	2.33405	0	0	0
17537	-1.16591	-7.33947	GSE136103	T cells	0	0	0	0
17553	1.45265	3.52646	GSE136103	Cholangiocytes	0	0	0	0
17565	6.58722	-3.46501	GSE136103	T cells	0	0	0	0
17570	-0.239076	-6.30718	GSE136103	T cells	0	0	0	0
17580	-1.29183	9.98648	GSE136103	Mesenchyme	0	0	0	1.88693
17587	7.90471	4.08584	GSE136103	Resident NK	0	0	0	0
17591	1.37776	4.60777	GSE136103	Cholangiocytes	0	0	0	0
17595	-0.136765	6.22634	GSE136103	Cholangiocytes	0	0	0	0
17631	0.0925113	8.95572	GSE136103	Mesenchyme	0	0	0	4.01497
17661	-0.457351	-7.08494	GSE136103	T cells	0	0	0	0
17668	8.52402	4.99202	GSE136103	Resident NK	0	0	0	0
17670	-0.0570246	5.03219	GSE136103	Cholangiocytes	1.96395	0	0	0
17672	0.0626383	-3.60523	GSE136103	Neutrophils	0	0	0	0
17675	-0.0155765	4.88158	GSE136103	Cholangiocytes	0	0	0	0
17692	3.07596	-6.64151	GSE136103	T cells	0	0	0	0
17697	4.14081	-5.10051	GSE136103	T cells	0	0	0	0
17707	0.363361	6.18169	GSE136103	Cholangiocytes	0	0	0	0
17718	-3.05175	-2.47413	GSE136103	T cells	0	0	2.19368	0
17720	-1.94921	-7.19981	GSE136103	T cells	0	0	0	0
17726	-12.3997	4.367	GSE136103	MP	0	0	0	0
17730	10.8375	-6.98284	GSE136103	Circulating NK/NKT	0	0	0	0
17731	-3.17372	-4.13176	GSE136103	T cells	0	0	0	0
17732	-0.566764	-14.2956	GSE136103	B cells	0	0	0	0
17736	-1.03426	10.1092	GSE136103	Mesenchyme	0	0	0	2.85262
17745	-9.04931	2.01506	GSE136103	MP	0	0	0	0
17749	0.0983645	5.70985	GSE136103	Cholangiocytes	0	0	0	0
17759	-2.58433	-5.95756	GSE136103	T cells	0	0	0	0
17772	0.404703	-8.17136	GSE136103	T cells	0	0	0	0
17776	-1.95056	9.51107	GSE136103	Mesenchyme	0	0	0	0
17780	-0.871472	10.0844	GSE136103	Mesenchyme	0	0	0	2.91188
17786	-2.09744	-5.26313	GSE136103	T cells	0	0	0	0
17826	-0.467579	5.76232	GSE136103	Cholangiocytes	0	0	0	0
17857	-2.55954	-4.53269	GSE136103	T cells	0	0	0	0
17875	-2.10544	-6.39208	GSE136103	T cells	0	0	0	0
17887	-0.0562828	4.8667	GSE136103	Cholangiocytes	0	0	0	0
17904	-0.364405	-3.45664	GSE136103	Neutrophils	0	0	0	2.59922
17906	3.82316	-4.42576	GSE136103	T cells	0	0	0	0
17967	-0.409383	6.11819	GSE136103	Cholangiocytes	0	0	0	0
17970	-5.51714	-3.10368	GSE136103	T cells	0	0	0	0
17971	5.63429	-3.01061	GSE136103	T cells	0	0	0	0
17974	-4.59048	-1.88581	GSE136103	T cells	1.97939	0	0	1.97939
17976	-1.02372	10.1833	GSE136103	Mesenchyme	0	0	0	3.24237
17981	-1.79967	-3.52851	GSE136103	T cells	0	0	0	0
17986	5.80536	4.71225	GSE136103	Resident NK	0	0	0	0
18044	3.91396	-6.15009	GSE136103	T cells	0	0	0	0
18047	6.04602	5.26087	GSE136103	Resident NK	0	0	0	0
18052	-1.56981	9.91441	GSE136103	Mesenchyme	0	0	0	2.71674
18054	9.10173	4.42879	GSE136103	Resident NK	0	0	0	0
18062	-1.97387	9.40781	GSE136103	Mesenchyme	0	0	0	0
18066	5.66575	-3.61774	GSE136103	T cells	0	0	0	0
18077	-2.69798	-2.09975	GSE136103	T cells	0	0	0	0
18105	-0.240493	9.44373	GSE136103	Mesenchyme	0	0	0	4.61843
18109	-5.79571	-3.23187	GSE136103	T cells	0	0	0	0
18120	-2.35325	-5.63045	GSE136103	T cells	0	0	0	1.8272
18124	7.22954	5.46879	GSE136103	Resident NK	0	0	0	0
18148	7.86008	5.64036	GSE136103	Resident NK	0	0	0	0
18166	11.3386	-5.87418	GSE136103	Circulating NK/NKT	0	0	0	0
18174	3.31622	-5.2472	GSE136103	T cells	0	0	0	0
18175	-4.04676	-2.80931	GSE136103	T cells	0	0	0	0
18177	9.75414	-4.01532	GSE136103	Circulating NK/NKT	0	0	0	0
18204	-2.35169	-1.96085	GSE136103	T cells	0	0	0	0
18205	-11.0097	5.40882	GSE136103	MP	0	0	0	0
18214	7.60391	5.34336	GSE136103	Resident NK	0	0	0	0
18238	-0.836052	9.84988	GSE136103	Mesenchyme	0	0	0	2.14894
18244	0.760461	5.11275	GSE136103	Cholangiocytes	0	0	0	0
18274	-0.724636	5.17581	GSE136103	Cholangiocytes	0	0	0	0
18275	0.156677	4.46102	GSE136103	Neutrophils	0	0	0	0
18280	-0.804086	10.1185	GSE136103	Mesenchyme	0	0	0	3.53895
18283	3.76168	-4.86305	GSE136103	T cells	0	0	0	0
18287	-12.7327	3.00608	GSE136103	MP	0	0	0	0
18300	0.732382	-1.01693	GSE136103	Hepatocytes	0	0	0	0
18324	-0.292342	8.99557	GSE136103	Mesenchyme	0	0	0	3.14087
18325	-0.423824	-6.23033	GSE136103	T cells	0	0	0	0
18349	-2.15925	-5.71913	GSE136103	T cells	0	0	0	0
18365	0.10826	6.55771	GSE136103	Cholangiocytes	0	0	0	0
18384	8.42918	4.62738	GSE136103	Resident NK	0	0	0	0
18390	0.746477	5.72604	GSE136103	Cholangiocytes	0	0	0	1.72957
18413	-0.159349	5.3866	GSE136103	Cholangiocytes	0	0	0	0
18415	-0.623381	9.48415	GSE136103	Mesenchyme	2.3502	0	0	3.88029
18428	-0.639403	9.90579	GSE136103	Mesenchyme	0	0	0	2.96756
18431	1.46987	4.67333	GSE136103	Cholangiocytes	1.37899	0	0	0
18436	6.20059	-3.2446	GSE136103	T cells	0	0	0	0
18443	-2.23696	-14.1407	GSE136103	B cells	0	0	0	0
18453	-0.101287	5.50064	GSE136103	Cholangiocytes	0	0	0	0
18459	6.82939	5.89474	GSE136103	Resident NK	0	0	0	0
18485	-10.0265	0.787629	GSE136103	MP	0	0	0	0
18529	-0.189249	3.847	GSE136103	Cholangiocytes	0	0	0	0
18539	1.62729	4.08306	GSE136103	Cholangiocytes	0	0	0	0
18547	3.16514	-6.28278	GSE136103	T cells	0	0	0	0
18551	8.48613	5.23676	GSE136103	Resident NK	0	0	0	0
18559	0.153002	4.99112	GSE136103	Cholangiocytes	0	0	0	0
18568	0.060389	4.66209	GSE136103	Cholangiocytes	0	0	0	0
18577	-1.84826	9.61471	GSE136103	Mesenchyme	0	0	0	0
18587	-1.41744	-7.83255	GSE136103	T cells	0	0	0	0
18616	-1.88	-4.8987	GSE136103	T cells	0	0	0	0
18626	-0.402596	5.69376	GSE136103	Cholangiocytes	0	0	0	0
18639	-0.901689	10.0967	GSE136103	Mesenchyme	0	0	0	3.43612
18640	-0.712783	-7.80257	GSE136103	T cells	0	0	0	0
18655	2.7676	-6.65298	GSE136103	T cells	0	0	0	0
18666	1.03358	4.81884	GSE136103	Cholangiocytes	0	0	0	0
18672	1.2064	4.72232	GSE136103	Cholangiocytes	0	0	0	0
18673	6.33105	5.72486	GSE136103	Resident NK	0	0	0	0
18677	7.61297	4.71566	GSE136103	Resident NK	0	0	0	0
18679	11.1869	-6.58665	GSE136103	Circulating NK/NKT	0	0	0	0
18728	0.272561	6.43066	GSE136103	Cholangiocytes	0	0	0	1.12461
18741	0.556841	5.51457	GSE136103	Cholangiocytes	0	0	0	0
18757	-2.07421	-1.47954	GSE136103	T cells	0	0	0	0
18763	-0.355657	6.36287	GSE136103	Cholangiocytes	0	0	0	0
18785	-0.124972	5.41558	GSE136103	Cholangiocytes	0	0	0	0
18798	1.23732	1.23428	GSE136103	Hepatocytes	0	0	0	0
18805	-0.932642	-7.93451	GSE136103	T cells	0	0	0	0
18809	-4.34751	-3.2356	GSE136103	T cells	0	0	0	0
18825	-10.1388	5.76651	GSE136103	MP	0	0	0	0
18831	0.627181	5.16133	GSE136103	Cholangiocytes	0	0	0	0
18843	0.198898	3.79373	GSE136103	Cholangiocytes	0	0	0	0
18850	-0.194727	-5.13671	GSE136103	T cells	0	0	0	0
18886	1.88997	12.1111	GSE136103	Endothelial cells	0	0	0	0
18923	11.2763	-5.62178	GSE136103	Circulating NK/NKT	0	0	0	0
18941	2.41521	-5.6275	GSE136103	T cells	0	0	0	0
18948	4.2601	-5.32352	GSE136103	T cells	0	0	0	0
18953	3.23856	-6.19995	GSE136103	T cells	0	0	0	0
18973	-12.8903	3.01943	GSE136103	MP	0	0	0	1.80841
18974	6.15828	5.03074	GSE136103	Resident NK	0	0	0	0
18983	9.19032	4.21065	GSE136103	Resident NK	0	0	0	0
18990	8.63256	3.16553	GSE136103	Resident NK	0	0	0	0
18998	-1.81715	9.65047	GSE136103	Mesenchyme	0	0	0	1.5411
19010	-1.73591	-5.20365	GSE136103	T cells	0	0	0	0
19055	1.02694	5.33791	GSE136103	Cholangiocytes	0	0	0	0
19067	-0.104702	8.94368	GSE136103	Mesenchyme	0	0	0	4.10597
19071	2.48714	-4.78384	GSE136103	T cells	0	0	0	0
19078	-9.82525	8.49055	GSE136103	MP	0	0	0	0
19080	1.97925	-6.64334	GSE136103	T cells	0	0	0	0
19097	-1.715	9.73293	GSE136103	Mesenchyme	0	0	0	0
19116	7.22994	5.98573	GSE136103	Resident NK	0	0	0	0
19120	-0.240779	9.21701	GSE136103	Mesenchyme	0	0	0	4.93483
19138	-0.16207	6.00308	GSE136103	Cholangiocytes	0	0	0	0
19174	0.910344	-4.7271	GSE136103	T cells	0	0	0	2.41442
19227	6.86013	-2.45714	GSE136103	T cells	0	0	0	0
19242	-1.34671	9.73275	GSE136103	Mesenchyme	0	0	0	2.31
19253	7.39442	5.86108	GSE136103	Resident NK	0	0	0	0
19254	8.40992	5.12622	GSE136103	Resident NK	0	0	0	0
19255	-0.510989	-2.5896	GSE136103	Hepatocytes	0	0	0	0
19258	1.05332	4.57454	GSE136103	Cholangiocytes	0	0	0	0
19301	7.56005	5.14685	GSE136103	Resident NK	0	0	0	0
19324	2.33963	-5.70879	GSE136103	T cells	0	0	0	0
19334	1.1246	5.02228	GSE136103	Cholangiocytes	0	0	0	0
19350	3.86341	11.6022	GSE136103	Endothelial cells	0	0	0	0
19353	-2.70602	-3.95841	GSE136103	T cells	0	0	0	0
19354	0.55977	-4.22181	GSE136103	Neutrophils	0	0	0	0
19359	-10.5514	7.73677	GSE136103	MP	0	0	0	0
19360	-0.942488	10.0041	GSE136103	Mesenchyme	0	0	0	0
19364	-8.69916	-2.91129	GSE136103	Mast cell	0	0	0	1.41873
19378	0.397518	5.4264	GSE136103	Cholangiocytes	0	0	0	0
19379	11.4377	-6.64409	GSE136103	Circulating NK/NKT	0	0	0	0
19394	3.44891	-6.36761	GSE136103	T cells	0	0	0	0
19401	6.58407	5.53268	GSE136103	Resident NK	0	0	0	0
19415	4.84248	5.32963	GSE136103	Resident NK	0	0	0	0
19427	6.68163	-2.98444	GSE136103	T cells	0	0	0	0
19437	-12.634	4.01018	GSE136103	MP	0	0	0	0
19448	6.81161	5.94237	GSE136103	Resident NK	0	0	0	0
19472	9.38615	4.02102	GSE136103	Resident NK	0	0	0	0
19479	1.80189	11.9679	GSE136103	Endothelial cells	0	0	0	0
19499	-2.86379	-1.13694	GSE136103	T cells	0	0	0	0
19502	-1.01691	5.82892	GSE136103	Cholangiocytes	0	0	0	0
19529	-3.48929	-1.46535	GSE136103	T cells	0	0	0	0
19561	-5.85947	5.37593	GSE136103	MP	0	0	0	0
19568	-12.7782	3.14635	GSE136103	MP	0	0	0	0
19576	-2.78899	-2.94658	GSE136103	T cells	0	0	0	0
19624	-0.571171	9.84839	GSE136103	Mesenchyme	0	0	0	4.52914
19630	10.7241	-5.86965	GSE136103	Circulating NK/NKT	0	0	0	0
19648	1.18457	-13.7211	GSE136103	B cells	0	0	0	0
19656	-2.47347	-5.53739	GSE136103	T cells	0	0	0	0
19676	-0.746639	-7.16126	GSE136103	T cells	0	0	0	0
19683	-0.157704	4.92909	GSE136103	Cholangiocytes	0	0	0	0
19688	-2.90127	-6.76965	GSE136103	T cells	0	0	0	0
19708	3.00636	-6.67543	GSE136103	T cells	0	0	0	0
19711	1.69447	12.0575	GSE136103	Endothelial cells	0	0	0	0
19723	-12.4126	3.85163	GSE136103	MP	0	0	0	0
19745	-0.384758	9.7619	GSE136103	Mesenchyme	0	0	0	4.19392
19759	9.20468	4.28652	GSE136103	Resident NK	0	0	0	0
19760	-0.0926481	5.90851	GSE136103	Cholangiocytes	0	0	0	0
19771	1.14146	-3.33824	GSE136103	T cells	0	0	0	0
19802	-0.934257	10.0977	GSE136103	Mesenchyme	0	0	0	4.20005
19804	0.199383	6.77043	GSE136103	Cholangiocytes	0	0	0	0
19816	-0.227514	9.44586	GSE136103	Mesenchyme	0	0	0	4.12076
19833	2.94477	-4.66542	GSE136103	T cells	0	0	0	0
19843	8.59356	4.81777	GSE136103	Resident NK	0	0	0	0
19886	1.04716	4.35827	GSE136103	Cholangiocytes	0	0	0	0
19897	-1.84333	9.59194	GSE136103	Mesenchyme	0	0	0	0
19909	-0.304143	9.57567	GSE136103	Mesenchyme	0	0	0	4.34374
19932	-10.4297	7.90649	GSE136103	MP	0	0	0	0
19950	-7.21093	-0.418682	GSE136103	Mast cell	0	0	1.63821	0
19955	-2.55841	-1.37584	GSE136103	T cells	0	0	0	0
19960	9.88602	-5.37279	GSE136103	Circulating NK/NKT	0	0	0	0
19962	-12.2146	3.09387	GSE136103	MP	0	0	0	1.12714
19975	-0.850163	9.83946	GSE136103	Mesenchyme	0	0	0	2.37282
19997	-4.64429	-2.00914	GSE136103	T cells	0	0	0	0
20016	9.17947	3.31938	GSE136103	Resident NK	0	0	0	0
20018	10.4353	-6.53992	GSE136103	Circulating NK/NKT	0	0	0	2.3623
20030	0.955581	5.07182	GSE136103	Cholangiocytes	0	0	0	0
20041	5.57219	-3.42497	GSE136103	T cells	0	0	0	0
20053	3.83284	-5.61314	GSE136103	T cells	0	0	0	0
20058	1.16186	4.96612	GSE136103	Cholangiocytes	0	0	0	0
20062	0.396482	4.57445	GSE136103	Cholangiocytes	0	0	0	0
20063	4.9554	13.9878	GSE136103	Endothelial cells	0	0	0	2.00731
20083	-0.260293	-7.90186	GSE136103	T cells	0	0	0	0
20093	-12.5638	3.63946	GSE136103	MP	0	0	0	0
20097	3.51981	-5.54968	GSE136103	T cells	0	0	0	0
20099	-4.69217	-2.76057	GSE136103	T cells	0	0	0	0
20107	2.47777	-7.03463	GSE136103	T cells	0	0	0	0
20111	6.10865	5.75917	GSE136103	Resident NK	0	0	0	0
20113	0.352524	5.3914	GSE136103	Cholangiocytes	0	0	0	0
20157	-4.1688	-2.7257	GSE136103	T cells	0	0	0	0
20160	-12.1599	4.19607	GSE136103	MP	0	0	0	0
20164	-10.0909	1.19433	GSE136103	MP	0	0	0	0
20169	-0.117898	4.06387	GSE136103	Cholangiocytes	0	0	0	0
20176	6.67812	-2.59715	GSE136103	T cells	0	0	0	0
20179	-8.57212	4.06965	GSE136103	MP	0	0	0	0
20187	4.12054	-6.35309	GSE136103	T cells	0	0	0	0
20195	1.58628	4.07538	GSE136103	Cholangiocytes	0	0	0	0
20203	11.4342	-6.36658	GSE136103	Circulating NK/NKT	0	0	0	0
20230	-0.0842941	-14.0603	GSE136103	B cells	0	0	0	0
20250	-1.68689	9.73813	GSE136103	Mesenchyme	0	0	0	2.07247
20251	-1.92349	-6.94419	GSE136103	T cells	0	0	0	0
20278	0.326735	5.1529	GSE136103	Cholangiocytes	0	0	0	0
20298	0.798392	5.37951	GSE136103	Cholangiocytes	0	0	0	0
20305	11.0304	-5.25152	GSE136103	Circulating NK/NKT	0	0	0	0
20306	9.62799	-4.82164	GSE136103	Circulating NK/NKT	0	0	0	0
20335	6.38747	5.98325	GSE136103	Resident NK	0	0	0	0
20354	6.18033	4.20769	GSE136103	Resident NK	0	0	0	0
20366	-9.99743	1.07791	GSE136103	MP	0	0	0	0
20390	10.8119	-4.49477	GSE136103	Circulating NK/NKT	0	0	0	0
20412	6.79492	5.46316	GSE136103	Resident NK	0	0	0	0
20423	-1.61808	9.64214	GSE136103	Mesenchyme	0	0	0	0
20430	-2.16412	-6.27894	GSE136103	T cells	0	0	0	0
20431	3.23549	-5.05256	GSE136103	T cells	0	0	0	0
20435	-4.38977	-3.36227	GSE136103	T cells	0	0	0	0
20446	3.00905	-6.35584	GSE136103	T cells	0	0	0	0
20459	5.37461	-2.94459	GSE136103	T cells	0	0	0	0
20460	-3.25444	-4.4418	GSE136103	T cells	0	0	0	0
20471	3.74313	-6.11596	GSE136103	T cells	0	0	0	0
20477	3.79651	-5.74721	GSE136103	T cells	0	0	0	0
20505	-8.44465	6.20482	GSE136103	Neutrophils	0	0	0	0
20506	-3.84243	-1.6318	GSE136103	T cells	0	0	0	0
20531	7.49298	3.28142	GSE136103	Resident NK	0	0	0	0
20533	-5.42816	4.66885	GSE136103	MP	0	0	0	0
20538	11.525	-5.82414	GSE136103	Circulating NK/NKT	0	0	0	0
20542	2.4248	-6.73944	GSE136103	T cells	0	0	0	0
20546	-1.1657	10.0541	GSE136103	Mesenchyme	0	0	0	2.85803
20547	-4.0128	-1.95513	GSE136103	T cells	0	0	0	0
20568	5.38186	5.04819	GSE136103	Resident NK	0	0	0	0
20574	-2.951	-2.97729	GSE136103	T cells	0	0	0	0
20577	-1.47753	-5.34782	GSE136103	T cells	0	0	0	0
20583	-0.279903	9.40696	GSE136103	Mesenchyme	0	0	0	5.18035
20606	-12.6382	3.78275	GSE136103	MP	0	0	0	1.50357
20619	3.7296	-6.18064	GSE136103	T cells	0	0	0	0
20620	-0.563278	-8.08855	GSE136103	T cells	0	0	0	2.54452
20621	-0.800661	10.0824	GSE136103	Mesenchyme	0	0	2.26701	2.26701
20627	-0.117978	5.12512	GSE136103	Cholangiocytes	0	0	0	0
20639	0.27969	4.93821	GSE136103	Cholangiocytes	0	0	0	0
20676	-1.95589	-4.69704	GSE136103	T cells	0	0	0	0
20688	0.424183	5.78608	GSE136103	Cholangiocytes	0	0	0	1.62727
20716	-0.942407	-3.65104	GSE136103	T cells	0	0	0	2.71498
20726	0.513224	5.03679	GSE136103	Cholangiocytes	0	0	0	0
20737	11.5179	-6.16744	GSE136103	Circulating NK/NKT	0	0	0	0
20754	-0.0256904	-5.62674	GSE136103	T cells	0	0	0	0
20767	-5.39967	5.97719	GSE136103	MP	0	0	0	0
20769	0.273242	-8.42162	GSE136103	T cells	0	0	0	0
20791	-1.56434	9.91911	GSE136103	Mesenchyme	0	0	0	0
20827	-1.969	9.41182	GSE136103	Mesenchyme	0	0	0	0
20835	-0.272435	9.32956	GSE136103	Mesenchyme	0	0	0	4.02283
20840	-8.04996	-1.7385	GSE136103	Mast cell	0	0	0	0
20876	-11.8096	-5.17207	GSE136103	pDCs	0	0	0	2.0521
20911	0.649677	5.03189	GSE136103	Cholangiocytes	2.0012	0	0	0
20923	-2.69029	-2.02993	GSE136103	T cells	0	0	0	0
20969	-10.4628	5.95711	GSE136103	MP	0	0	0	0
20974	3.17741	-5.44169	GSE136103	T cells	0	0	0	0
20984	-3.32854	-2.81767	GSE136103	T cells	0	0	0	0
20993	-3.91384	-4.24703	GSE136103	T cells	0	0	0	0
21009	-0.705802	10.0571	GSE136103	Mesenchyme	0	0	0	2.77001
21025	0.703485	4.6631	GSE136103	Cholangiocytes	0	0	0	0
21027	11.6704	-6.47093	GSE136103	Circulating NK/NKT	0	0	0	0
21034	-2.31385	-6.86992	GSE136103	T cells	0	0	0	0
21048	-0.557561	8.84481	GSE136103	Mesenchyme	0	0	0	3.79926
21049	4.55371	5.08789	GSE136103	Resident NK	0	0	0	0
21060	6.9432	5.08922	GSE136103	Resident NK	0	0	0	2.36318
21063	2.56863	-5.82494	GSE136103	T cells	0	0	0	0
21070	6.23226	-3.39214	GSE136103	T cells	0	0	0	0
21110	4.77804	-4.09813	GSE136103	T cells	0	0	0	0
21118	5.83423	4.50623	GSE136103	Resident NK	0	0	0	0
21150	5.48847	-3.81815	GSE136103	T cells	0	0	0	0
21153	-3.2963	-4.18799	GSE136103	T cells	0	0	0	0
21156	1.20748	4.43667	GSE136103	Cholangiocytes	0	0	0	0
21161	-6.46118	5.40004	GSE136103	MP	0	0	0	0
21169	-5.89246	-3.10163	GSE136103	T cells	0	0	0	0
21184	3.1535	-6.38235	GSE136103	T cells	0	0	0	0
21185	10.9843	-6.6903	GSE136103	Circulating NK/NKT	0	0	0	0
21205	8.6866	4.62375	GSE136103	Resident NK	0	0	0	0
21212	-1.68449	-5.46928	GSE136103	T cells	0	0	0	1.98913
21225	7.56621	-2.65226	GSE136103	T cells	0	0	0	0
21235	3.67717	-5.44094	GSE136103	T cells	0	0	0	0
21240	4.08041	-5.88101	GSE136103	T cells	0	0	0	0
21245	7.33979	4.9518	GSE136103	Resident NK	0	0	0	0
21249	5.01097	5.28211	GSE136103	Resident NK	0	0	0	0
21259	-1.46268	9.77961	GSE136103	Mesenchyme	0	0	0	0
21272	0.276082	-4.03914	GSE136103	Neutrophils	0	0	0	2.64054
21293	-0.988058	-4.73694	GSE136103	T cells	0	0	0	0
21295	-5.28772	-3.74931	GSE136103	T cells	0	0	0	0
21314	3.04247	-4.61021	GSE136103	T cells	0	0	0	0
21316	2.80419	-5.76243	GSE136103	T cells	0	0	0	0
21317	6.99387	5.76966	GSE136103	Resident NK	0	0	0	0
21354	8.257	3.55423	GSE136103	Resident NK	0	0	0	0
21375	-7.70489	12.1712	GSE136103	MP	0	0	0	0
21392	-1.20325	-4.63871	GSE136103	T cells	0	0	0	0
21411	-13.1851	2.64317	GSE136103	MP	0	0	0	0
21425	7.62837	3.1631	GSE136103	Resident NK	0	0	0	0
21447	0.309494	-3.93095	GSE136103	Neutrophils	0	0	0	0
21456	-4.4498	-1.77568	GSE136103	T cells	2.0743	0	0	0
21457	-2.39879	-5.19541	GSE136103	T cells	0	0	0	0
21477	0.365169	5.10158	GSE136103	Cholangiocytes	0	0	0	0
21503	-3.97112	-3.44493	GSE136103	T cells	0	0	0	0
21521	0.364851	6.90328	GSE136103	Cholangiocytes	0	0	0	0
21522	3.20261	-5.72686	GSE136103	T cells	0	0	0	0
21538	3.05277	-6.05713	GSE136103	T cells	0	0	0	0
21546	-0.551517	5.90102	GSE136103	Cholangiocytes	0	0	0	0
21550	0.426578	6.72475	GSE136103	Cholangiocytes	1.4093	0	0	0
21553	-0.980189	-8.19578	GSE136103	T cells	0	0	0	0
21595	0.0838688	4.77664	GSE136103	Cholangiocytes	0	0	0	0
21610	-0.610835	10.0008	GSE136103	Mesenchyme	0	0	0	4.13578
21629	-0.158872	5.36928	GSE136103	Cholangiocytes	0	0	0	0
21676	-3.47033	-7.2895	GSE136103	T cells	0	0	0	0
21694	-1.85257	-6.00112	GSE136103	T cells	0	0	0	0
21696	10.8944	-4.89924	GSE136103	Circulating NK/NKT	0	0	0	0
21759	1.98033	-6.30218	GSE136103	T cells	0	0	0	0
21809	8.30326	5.29492	GSE136103	Resident NK	0	0	0	0
21810	-0.674881	10.0026	GSE136103	Mesenchyme	0	0	0	3.69235
21811	-0.509405	9.91229	GSE136103	Mesenchyme	0	0	0	3.93576
21813	3.524	-6.5012	GSE136103	T cells	0	0	0	0
21815	7.95317	4.27183	GSE136103	Resident NK	0	0	0	0
21837	-1.10769	9.8569	GSE136103	Mesenchyme	0	0	1.44789	4.14041
21844	1.14437	4.98025	GSE136103	Cholangiocytes	0	0	0	0
21846	-0.918059	13.4303	GSE136103	Mesenchyme	0	0	0	0
21862	-1.99013	-5.59769	GSE136103	T cells	0	0	0	0
21863	-3.99154	-1.72146	GSE136103	T cells	0	0	0	0
21871	-3.21809	-2.1931	GSE136103	T cells	0	0	0	0
21890	0.821791	4.85714	GSE136103	Cholangiocytes	0	0	0	0
21895	-2.01652	-2.61643	GSE136103	T cells	0	0	0	0
21912	-1.06823	-4.23673	GSE136103	T cells	0	0	0	0
21925	1.57537	-5.25814	GSE136103	T cells	0	0	0	0
21940	-1.99929	9.50862	GSE136103	Mesenchyme	0	0	0	1.63156
21948	-2.98159	-4.13502	GSE136103	T cells	0	0	0	0
21958	0.736431	4.47772	GSE136103	Cholangiocytes	0	0	0	0
21966	8.10553	5.16889	GSE136103	Resident NK	0	0	0	0
21970	5.00207	14.0103	GSE136103	Endothelial cells	0	0	0	0
21984	11.1874	-5.75658	GSE136103	Circulating NK/NKT	0	0	0	0
22004	1.41963	4.66876	GSE136103	Cholangiocytes	0	0	0	0
22063	-0.416193	5.90161	GSE136103	Cholangiocytes	0	0	0	0
22064	9.09941	3.80128	GSE136103	Resident NK	0	0	0	0
22088	6.13289	5.82429	GSE136103	Resident NK	0	0	0	0
22119	-2.98974	-4.75059	GSE136103	T cells	0	0	0	0
22125	0.00985783	-4.057	GSE136103	Neutrophils	0	0	2.48399	0
22127	-1.76861	9.75618	GSE136103	Mesenchyme	0	0	0	0
22163	-9.18794	7.26504	GSE136103	MP	0	0	0	0
22164	-11.8344	3.24706	GSE136103	MP	0	0	0	0
22168	3.75437	-4.62076	GSE136103	T cells	0	0	0	0
22176	6.60742	-3.48618	GSE136103	T cells	0	0	0	0
22177	-2.56492	-5.71283	GSE136103	T cells	0	0	0	0
22178	0.582276	5.07043	GSE136103	Cholangiocytes	0	0	0	0
22209	8.53598	4.88293	GSE136103	Resident NK	0	0	0	0
22227	-1.28317	9.96474	GSE136103	Mesenchyme	0	0	0	2.67571
22231	3.25387	-6.99139	GSE136103	T cells	0	0	0	0
22234	-1.02931	10.0958	GSE136103	Mesenchyme	0	0	0	3.73785
22247	0.605393	-4.9197	GSE136103	T cells	0	0	0	0
22248	-1.22933	-6.53938	GSE136103	T cells	0	0	0	0
22261	-1.08989	-3.75053	GSE136103	Hepatocytes	0	0	0	0
22262	-15.8512	2.1571	GSE136103	MP	0	0	0	0.988816
22263	-1.00939	9.89205	GSE136103	Mesenchyme	0	0	0	3.60665
22298	-5.10109	-1.48096	GSE136103	T cells	0	0	0	0
22306	2.41704	-6.51789	GSE136103	T cells	0	0	0	0
22317	-0.416801	8.88743	GSE136103	Mesenchyme	0	0	0	3.65799
22318	3.2047	-7.15498	GSE136103	T cells	2.61787	0	0	0
22335	-2.45996	-5.23809	GSE136103	T cells	0	0	0	0
22336	0.687821	5.82018	GSE136103	Cholangiocytes	0	0	0	0
22378	-6.94258	-0.106736	GSE136103	Mast cell	0	0	0	0
22386	3.54746	-4.97243	GSE136103	T cells	0	0	0	0
22393	0.212903	5.21492	GSE136103	Cholangiocytes	0	0	0	0
22395	2.38991	7.81915	GSE136103	Mesenchyme	0	0	3.19633	0
22407	-3.86578	-2.85271	GSE136103	T cells	0	0	0	0
22418	-3.02873	-2.24575	GSE136103	T cells	0	0	0	0
22423	-1.36383	-2.87766	GSE136103	T cells	0	0	0	3.30367
22426	-1.3263	-5.0327	GSE136103	T cells	0	0	0	0
22428	-3.91348	-2.51492	GSE136103	T cells	0	0	0	0
22429	5.58746	5.28175	GSE136103	Resident NK	0	0	0	0
22433	4.18641	13.1104	GSE136103	Hepatocytes	0	0	0	0
22451	-1.3022	-5.2617	GSE136103	T cells	0	0	0	0
22453	-1.54351	-6.7635	GSE136103	T cells	0	0	0	0
22460	4.99628	5.27536	GSE136103	Resident NK	0	0	0	0
22478	-0.17451	9.37024	GSE136103	Mesenchyme	0	0	0	4.3001
22489	-8.22272	-2.05392	GSE136103	Mast cell	0	0	0	0
22498	6.80401	4.04405	GSE136103	Resident NK	0	0	0	0
22518	-12.8433	3.68175	GSE136103	MP	0	0	0	1.29311
22523	-3.60488	-1.94211	GSE136103	T cells	0	0	0	0
22530	-0.240437	9.19563	GSE136103	Mesenchyme	0	0	1.90716	4.52983
22536	-0.377082	-14.4074	GSE136103	B cells	0	0	0	0
22595	10.2241	-5.81297	GSE136103	Circulating NK/NKT	0	0	0	0
22603	1.74634	-4.49895	GSE136103	T cells	0	0	0	0
22623	-2.64015	-6.17299	GSE136103	T cells	0	0	0	0
22628	-1.36596	9.61615	GSE136103	Mesenchyme	0	0	0	2.51059
22651	0.795452	-13.899	GSE136103	B cells	0	0	0	0
22663	10.2037	-3.92127	GSE136103	Circulating NK/NKT	0	0	0	0
22675	2.55132	-3.75158	GSE136103	T cells	0	0	0	0
22700	-1.83589	9.59472	GSE136103	Mesenchyme	0	0	0	0
22720	4.46239	-6.43408	GSE136103	T cells	0	0	0	0
22723	-1.63448	9.86089	GSE136103	Mesenchyme	0	0	1.84224	1.84224
22724	2.94917	-5.62422	GSE136103	T cells	0	0	0	0
22733	4.59961	-4.15471	GSE136103	T cells	0	0	0	0
22735	4.78661	5.39607	GSE136103	Resident NK	0	0	0	0
22741	3.31071	-4.51422	GSE136103	T cells	0	0	0	0
22751	-1.70018	9.59672	GSE136103	Mesenchyme	0	0	0	0
22755	2.32531	-6.45267	GSE136103	T cells	0	0	0	0
22764	0.882836	-3.30703	GSE136103	T cells	0	0	0	0
22788	0.385729	-14.2751	GSE136103	B cells	0	0	0	0
22825	0.515768	4.73957	GSE136103	Cholangiocytes	0	0	0	0
22861	-4.1924	-2.05697	GSE136103	T cells	0	0	0	0
22863	-0.276525	-7.75038	GSE136103	T cells	0	0	0	0
22869	-1.27781	-6.55853	GSE136103	T cells	0	0	0	0
22891	-9.04795	-10.2706	GSE136103	Plasma cells	0	0	0	0
22893	-6.31605	5.68457	GSE136103	MP	0	0	0	0
22896	-5.77308	5.98094	GSE136103	MP	0	0	0	0
22901	2.67328	-4.97214	GSE136103	T cells	0	0	0	0
22936	2.7204	-6.14473	GSE136103	T cells	0	0	0	0
22941	0.861699	5.10306	GSE136103	Cholangiocytes	0	0	0	0
22989	1.33404	4.57475	GSE136103	Cholangiocytes	0	0	0	1.80564
22999	1.76348	-3.32145	GSE136103	T cells	0	0	0	0
23021	-3.74736	-2.26357	GSE136103	T cells	0	0	0	0
23022	-2.69952	-5.26284	GSE136103	T cells	0	0	0	0
23054	-8.40206	4.63245	GSE136103	MP	0	0	0	0
23089	2.98321	-6.91595	GSE136103	T cells	0	0	0	0
23090	3.24101	-4.6077	GSE136103	T cells	0	0	0	0
23097	10.1488	-5.80688	GSE136103	Circulating NK/NKT	0	0	0	0
23099	-0.52839	9.92082	GSE136103	Mesenchyme	0	0	0	4.13035
23118	0.686271	4.75854	GSE136103	Cholangiocytes	0	0	0	0
23126	-1.86751	9.60304	GSE136103	Mesenchyme	0	0	0	2.37961
23128	7.63816	4.69546	GSE136103	Resident NK	0	0	0	0
23130	0.747419	5.13431	GSE136103	Cholangiocytes	0	0	0	0
23136	7.5386	5.25247	GSE136103	Resident NK	0	0	0	0
23138	1.24998	4.69783	GSE136103	Cholangiocytes	0	0	0	0
23140	-3.14512	-1.95199	GSE136103	T cells	0	0	0	0
23175	-0.900652	10.0077	GSE136103	Mesenchyme	0	0	2.30106	2.94283
23193	-11.8844	4.45431	GSE136103	MP	0	0	0	0
23225	-1.93381	-7.20443	GSE136103	T cells	0	0	0	0
23228	0.401839	5.11532	GSE136103	Cholangiocytes	0	0	0	0
23230	5.62992	5.78746	GSE136103	Resident NK	0	0	0	0
23241	-0.600837	8.74804	GSE136103	Mesenchyme	0	0	0	3.79606
23244	2.37888	-6.92548	GSE136103	T cells	0	0	0	0
23249	-3.39264	-2.19825	GSE136103	T cells	0	0	0	2.02252
23266	1.28363	4.20971	GSE136103	Cholangiocytes	0	0	0	0
23273	8.35782	4.98074	GSE136103	Resident NK	0	0	0	0
23285	2.76972	-6.58533	GSE136103	T cells	0	0	0	0
23287	1.59635	3.92507	GSE136103	Cholangiocytes	0	0	0	0
23297	9.13821	4.16376	GSE136103	Resident NK	0	0	0	0
23307	-0.180823	9.25415	GSE136103	Mesenchyme	0	0	0	4.69771
23350	8.81088	3.78154	GSE136103	Resident NK	0	0	0	0
23369	-0.479174	-7.66664	GSE136103	T cells	0	0	0	0
23371	-1.56384	-4.08701	GSE136103	T cells	0	0	0	0
23386	-0.121647	5.31084	GSE136103	Cholangiocytes	0	0	0	0
23395	10.5354	-4.22118	GSE136103	Circulating NK/NKT	0	0	0	0
23396	-0.279254	8.9962	GSE136103	Mesenchyme	0	0	0	3.72404
23399	-1.65153	-4.91294	GSE136103	T cells	0	0	0	0
23427	-1.73469	9.69541	GSE136103	Mesenchyme	0	0	2.0743	0
23430	-0.526324	6.19662	GSE136103	Cholangiocytes	0	0	0	0
23433	-8.80213	-10.1128	GSE136103	Plasma cells	0	0	0	1.68308
23437	2.33441	-6.68666	GSE136103	T cells	0	0	0	0
23444	-11.6318	-4.94165	GSE136103	pDCs	0	0	0	1.2748
23454	6.79181	4.85008	GSE136103	Resident NK	0	0	0	0
23459	-8.631	-2.77816	GSE136103	Mast cell	0	0	0	0
23498	1.17924	4.29571	GSE136103	Cholangiocytes	0	0	0	0
23505	-1.88904	9.5916	GSE136103	Mesenchyme	0	0	0	0
23516	-1.35861	9.99814	GSE136103	Mesenchyme	0	0	0	0
23547	0.4809	4.92706	GSE136103	Cholangiocytes	0	0	0	0
23574	6.53142	5.59236	GSE136103	Resident NK	0	0	0	0
23581	3.47338	-5.81235	GSE136103	T cells	0	0	0	0
23587	-0.288908	5.50608	GSE136103	Cholangiocytes	0	0	0	0
23610	0.102746	6.29224	GSE136103	Cholangiocytes	0	0	0	0
23641	4.56308	10.2276	GSE136103	Endothelial cells	0	0	0	0
23645	1.70941	11.6556	GSE136103	Endothelial cells	0	0	0	0
23696	-9.53504	6.9886	GSE136103	MP	0	0	0	0
23701	1.37965	1.98504	GSE136103	Hepatocytes	0	0	0	0
23743	6.86867	5.1153	GSE136103	Resident NK	0	0	0	0
23752	2.25829	-6.8027	GSE136103	T cells	0	0	0	0
23806	-0.00755345	4.55924	GSE136103	Cholangiocytes	0	0	0	0
23818	1.22905	4.61557	GSE136103	Cholangiocytes	0	0	0	0
23831	-10.4381	0.895471	GSE136103	MP	0	0	0	0
23848	7.36161	3.20658	GSE136103	Resident NK	0	0	0	2.64661
23863	4.7557	4.77576	GSE136103	Resident NK	0	0	0	0
23864	0.20121	4.61406	GSE136103	Cholangiocytes	0	0	0	0
23872	0.724105	-5.22986	GSE136103	T cells	0	0	0	0
23875	-7.77226	-1.3802	GSE136103	Mast cell	0.565672	0	0	0
23890	-10.0944	1.26328	GSE136103	MP	0	0	0	0
23926	9.16259	4.64345	GSE136103	Resident NK	0	0	0	0
23960	-2.56518	-6.7449	GSE136103	T cells	1.61716	0	0	0
23962	-0.887783	-4.12664	GSE136103	T cells	0	0	0	0
23979	-9.07082	-3.56543	GSE136103	Mast cell	0	0	0	0
24034	8.35886	5.08465	GSE136103	Resident NK	0	0	0	0
24044	-0.684682	9.9916	GSE136103	Mesenchyme	0	0	0	4.29145
24052	3.90474	-5.83923	GSE136103	T cells	0	0	0	0
24070	10.412	-7.26829	GSE136103	Circulating NK/NKT	0	0	0	0
24073	-0.367705	-4.14628	GSE136103	T cells	0	0	0	0
24091	-0.227952	-7.33592	GSE136103	T cells	0	0	0	0
24096	1.34252	5.07917	GSE136103	Cholangiocytes	0	0	0	0
24104	0.264958	5.44578	GSE136103	Cholangiocytes	0	0	0	0
24115	1.85071	11.919	GSE136103	Endothelial cells	0	0	0	0
24116	6.82299	6.03479	GSE136103	Resident NK	0	0	0	0
24121	3.11869	-4.39211	GSE136103	T cells	0	0	0	0
24135	0.067364	4.9881	GSE136103	Cholangiocytes	0	0	0	0
24139	3.08215	-6.50365	GSE136103	T cells	0	0	0	0
24145	-0.868075	9.93045	GSE136103	Mesenchyme	0	0	0	4.03114
24146	-1.93778	9.529	GSE136103	Mesenchyme	0	0	0	0
24152	8.67304	5.02729	GSE136103	Resident NK	0	0	0	0
24155	6.93799	5.43665	GSE136103	Resident NK	0	0	0	0
24161	-9.93906	1.58295	GSE136103	MP	0	0	0	0
24180	-0.646737	9.98592	GSE136103	Mesenchyme	0	0	0	3.58766
24191	2.84607	-7.09503	GSE136103	T cells	0	0	0	0
24217	-1.55498	9.89031	GSE136103	Mesenchyme	0	0	0	2.47797
24221	-1.34969	10.007	GSE136103	Mesenchyme	0	0	0	3.99476
24224	0.211979	8.90841	GSE136103	Mesenchyme	0	0	0	4.62307
24230	7.75317	4.95046	GSE136103	Resident NK	0	0	0	0
24240	-1.49526	9.8539	GSE136103	Mesenchyme	0	0	0	2.20007
24242	-9.23711	-10.3855	GSE136103	Plasma cells	0	0	0	0
24243	1.79917	11.3635	GSE136103	Endothelial cells	0	0	0	0
24251	-3.09575	-1.8011	GSE136103	T cells	0	0	0	0
24276	5.80614	-3.76934	GSE136103	T cells	0	0	0	0
24281	-0.174014	5.10943	GSE136103	Cholangiocytes	0	0	0	0
24290	-0.0717219	4.99036	GSE136103	Cholangiocytes	0	0	0	0
24305	-0.446991	5.76283	GSE136103	Cholangiocytes	0	0	0	0
24312	7.04901	-3.20912	GSE136103	T cells	0	0	0	2.09902
24335	0.398352	4.66661	GSE136103	Cholangiocytes	0	0	0	0
24344	-2.8557	-5.00651	GSE136103	T cells	0	2.89075	0	0
24349	5.02705	14.2674	GSE136103	Endothelial cells	0	0	0	0
24354	11.177	-4.79667	GSE136103	Circulating NK/NKT	0	0	0	0
24406	-1.06742	-7.71828	GSE136103	T cells	0	0	0	0
24413	6.82892	-3.1943	GSE136103	T cells	0	0	0	0
24437	-10.1486	7.91594	GSE136103	MP	0	0	0	0
24438	-0.79602	9.86673	GSE136103	Mesenchyme	0	0	0	4.93443
24447	6.62896	5.58183	GSE136103	Resident NK	0	0	0	0
24453	5.5811	5.15211	GSE136103	Resident NK	0	0	0	0
24457	0.237227	5.52103	GSE136103	Cholangiocytes	0	0	0	0
24474	1.26621	4.64656	GSE136103	Cholangiocytes	0	0	0	0
24480	1.82694	-6.59115	GSE136103	T cells	0	0	0	0
24505	1.22612	-4.85688	GSE136103	T cells	0	0	0	0
24521	0.0780553	4.5921	GSE136103	Cholangiocytes	0	0	0	0
24569	-1.09802	10.166	GSE136103	Mesenchyme	1.79093	0	0	0
24596	10.1397	-6.91507	GSE136103	Circulating NK/NKT	0	0	0	0
24622	8.67756	4.04996	GSE136103	Resident NK	0	0	0	0
24645	3.13724	-4.5933	GSE136103	T cells	0	0	0	0
24649	-3.87226	-4.27829	GSE136103	T cells	0	0	0	0
24664	-15.5722	2.19228	GSE136103	MP	0	0	0	0
24684	-0.548106	-8.48714	GSE136103	T cells	0	0	0	0
24710	1.81328	11.155	GSE136103	Endothelial cells	0	0	0	0
24716	5.18057	5.49616	GSE136103	Resident NK	0	0	0	0
24725	10.5575	-7.00135	GSE136103	Circulating NK/NKT	0	0	0	0
24752	5.25525	5.65849	GSE136103	Resident NK	0	0	0	0
24758	-2.72068	-4.34107	GSE136103	T cells	0	0	0	0
24766	6.28065	5.72221	GSE136103	Resident NK	0	0	0	0
24775	6.01396	5.77715	GSE136103	Resident NK	0	0	0	0
24789	-0.401136	-4.85066	GSE136103	T cells	0	0	0	0
24801	-9.47104	3.61003	GSE136103	MP	0	0	0	0
24812	2.25125	-2.88939	GSE136103	T cells	0	0	0	0
24819	-1.93647	-5.6747	GSE136103	T cells	0	0	0	0
24823	6.80068	5.6811	GSE136103	Resident NK	0	0	0	0
24825	-1.80459	9.60243	GSE136103	Mesenchyme	0	0	0	0
24841	9.19252	3.94619	GSE136103	Resident NK	0	0	0	0
24851	-2.08603	-3.98571	GSE136103	T cells	0	0	0	0
24852	-8.9531	-3.39893	GSE136103	Mast cell	0	0	0	0
24866	0.0932876	-2.07839	GSE136103	Hepatocytes	0	0	0	2.71433
24892	-5.02487	-3.06	GSE136103	T cells	0	0	0	0
24902	-1.1635	10.0917	GSE136103	Mesenchyme	0	0	0	0
24904	-3.31672	-3.40633	GSE136103	T cells	0	1.95661	0	0
24906	8.973	5.00675	GSE136103	Resident NK	0	0	0	0
24916	-2.22224	-3.00943	GSE136103	T cells	0	0	0	0
24923	1.20236	4.33565	GSE136103	Cholangiocytes	0	0	0	0
24931	10.9048	-4.94835	GSE136103	Circulating NK/NKT	0	0	0	0
24936	-1.8352	9.42863	GSE136103	Mesenchyme	0	0	0	0
24937	-6.90711	5.30534	GSE136103	MP	0	0	0	0
24945	-1.1874	10.0655	GSE136103	Mesenchyme	0	0	0	3.26776
24951	2.54109	-7.14057	GSE136103	T cells	0	0	0	0
24971	-1.02752	-3.73432	GSE136103	T cells	0	0	0	0
24995	0.66036	5.1442	GSE136103	Cholangiocytes	0	0	0	0
25033	7.25721	5.15362	GSE136103	Resident NK	0	0	0	0
25052	-0.842841	10.1316	GSE136103	Mesenchyme	0	0	0	2.54668
25066	-1.68752	9.7854	GSE136103	Mesenchyme	0	0	0	0
25078	-2.63843	-1.68183	GSE136103	T cells	0	0	0	0
25086	10.6441	-6.05507	GSE136103	Circulating NK/NKT	0	0	0	0
25105	-0.167464	-3.96306	GSE136103	Neutrophils	0	0	0	0
25118	-3.09011	-1.56045	GSE136103	T cells	0	0	0	0
25120	-0.0134558	6.77101	GSE136103	Cholangiocytes	0	0	0	0
25130	-1.59337	9.86364	GSE136103	Mesenchyme	0	0	0	2.5554
25146	11.1364	-6.47729	GSE136103	Circulating NK/NKT	0	0	0	0
25172	-2.85443	-2.48709	GSE136103	T cells	0	0	0	0
25178	-1.83458	9.56495	GSE136103	Mesenchyme	0	0	0	0
25181	0.616679	5.81276	GSE136103	Cholangiocytes	0	0	0	1.51123
25183	-1.85354	9.61979	GSE136103	Mesenchyme	0	0	0	0
25208	-1.20407	-4.44948	GSE136103	T cells	0	0	0	0
25218	8.72577	4.74267	GSE136103	Resident NK	0	0	0	0
25224	-2.29913	-5.90743	GSE136103	T cells	0	0	0	0
25230	-3.84032	-3.03231	GSE136103	T cells	0	0	0	0
25231	8.28809	5.27389	GSE136103	Resident NK	0	0	0	0
25234	-0.346408	6.02732	GSE136103	Cholangiocytes	0	0	0	1.90229
25241	-2.34537	-5.17118	GSE136103	T cells	0	0	0	0
25274	-12.4334	3.0103	GSE136103	MP	0	0	0	0
25294	8.19055	5.27454	GSE136103	Resident NK	0	0	0	0
25313	8.51109	6.29071	GSE136103	Mast cell	0	0	0	0
25318	-0.49057	9.8754	GSE136103	Mesenchyme	0	0	0	2.48097
25326	1.10881	5.29184	GSE136103	Cholangiocytes	0	0	0	0
25327	-2.19528	-4.63706	GSE136103	T cells	0	0	0	0
25348	0.0705646	6.57659	GSE136103	Cholangiocytes	0	0	0	0
25350	-2.36893	-3.08566	GSE136103	T cells	0	0	0	0
25355	-3.20561	-2.3557	GSE136103	T cells	0	0	0	0
25382	1.4672	4.20653	GSE136103	Cholangiocytes	2.00453	0	0	0
25452	-8.49547	3.03068	GSE136103	MP	0	0	0	0
25453	-2.11391	-6.10573	GSE136103	T cells	0	0	0	0
25454	-0.120948	-4.3297	GSE136103	Neutrophils	0	0	0	0
25465	-0.124991	4.82213	GSE136103	Cholangiocytes	0	0	0	0
25466	-2.38997	-2.3443	GSE136103	T cells	0	0	0	0
25469	-0.33335	9.68828	GSE136103	Mesenchyme	0	0	0	4.81595
25475	-7.29707	3.55279	GSE136103	MP	0	0	0	0
25477	-2.05447	-2.97775	GSE136103	T cells	0	0	0	0
25497	9.38634	3.66966	GSE136103	Resident NK	0	0	0	2.54236
25507	-0.216137	4.45835	GSE136103	Cholangiocytes	0	0	0	0
25508	-6.57795	5.00728	GSE136103	MP	0	0	0	0
25514	0.569473	4.85964	GSE136103	Cholangiocytes	0	0	0	0
25523	11.3831	-6.52054	GSE136103	Circulating NK/NKT	0	0	0	0
25557	-0.0927911	-3.7213	GSE136103	Neutrophils	0	0	0	3.65677
25581	1.37723	4.17085	GSE136103	Cholangiocytes	0	0	0	1.67493
25594	-0.414409	-5.57274	GSE136103	T cells	0	0	0	0
25601	2.46262	-6.87727	GSE136103	T cells	0	0	0	0
25602	2.78211	-6.0053	GSE136103	T cells	0	0	0	0
25614	10.5523	-5.11402	GSE136103	Circulating NK/NKT	0	0	0	0
25622	-1.37636	-7.98847	GSE136103	T cells	0	0	0	0
25641	-1.37877	9.59704	GSE136103	Mesenchyme	0	0	0	2.73497
25664	-0.381042	9.7592	GSE136103	Mesenchyme	0	0	0	4.13708
25670	7.61724	5.82495	GSE136103	Resident NK	0	0	0	0
25671	-1.89888	9.37145	GSE136103	Mesenchyme	1.53365	0	1.53365	0
25696	0.565662	5.01496	GSE136103	Cholangiocytes	0	0	0	0
25703	0.0374765	-7.72937	GSE136103	T cells	0	0	0	1.99789
25715	2.21485	-6.77212	GSE136103	T cells	0	0	0	0
25726	10.3136	-7.10871	GSE136103	Circulating NK/NKT	0	0	0	0
25731	8.1895	4.46463	GSE136103	Resident NK	0	0	0	0
25737	-9.85639	1.38841	GSE136103	MP	0	0	0	0
25750	11.0288	-5.46256	GSE136103	Circulating NK/NKT	0	0	0	0
25753	-2.9726	-7.17089	GSE136103	T cells	0	0	0	0
25772	3.04146	-5.62499	GSE136103	T cells	0	0	0	0
25778	3.05706	-6.24259	GSE136103	T cells	0	0	0	0
25781	0.203348	9.09112	GSE136103	Mesenchyme	0	0	2.31082	2.31082
25799	-1.85591	-5.77971	GSE136103	T cells	0	0	0	0
25800	0.239484	6.80618	GSE136103	Cholangiocytes	0	1.26068	0	0
25803	-2.06945	-6.92557	GSE136103	T cells	0	0	0	0
25805	-2.3731	-2.69768	GSE136103	T cells	0	0	0	0
25808	-0.232317	9.0037	GSE136103	Mesenchyme	0	0	0	4.38796
25812	-0.476194	-2.05729	GSE136103	Hepatocytes	0	0	0	0
25844	2.29653	-6.12234	GSE136103	T cells	0	0	0	0
25845	5.80209	5.56747	GSE136103	Resident NK	0	0	0	0
25852	-5.1595	-3.6229	GSE136103	T cells	0	0	0	0
25858	-2.54548	-5.30347	GSE136103	T cells	0	0	0	0
25860	-1.22365	10.0265	GSE136103	Mesenchyme	1.57271	0	0	3.56607
25880	-1.27321	-2.10017	GSE136103	Neutrophils	0	0	0	0
25886	-0.675199	-4.78653	GSE136103	T cells	0	0	0	0
25891	-9.35234	5.27675	GSE136103	MP	0	0	0	1.30827
25913	5.8544	4.5686	GSE136103	Resident NK	0	0	0	0
25921	11.0175	-6.2597	GSE136103	Circulating NK/NKT	0	0	0	0
25926	0.172996	5.34741	GSE136103	Cholangiocytes	0	0	0	0
25935	-2.86987	-3.03797	GSE136103	T cells	0	0	0	0
[truncated: 134,669 more rows]
