# Supplementary material for: Evaluation of Gremlin-1 as a therapeutic target in metabolic dysfunction-associated steatohepatitis
Source: eLife. 2024 Oct 3;13:RP95185. doi: 10.7554/eLife.95185 (PMC11449483; doi:10.7554/eLife.95185)
Supplement: Figure 1—source data 1. [file elife-95185-fig1-data1.xlsx]

## Sheet: Panel B (dot area in %)
Normal range	MASH F1	MASH F2/F3	MASH F4
0.017794	0.034217	0.081056	0.014263
0.018904	0.02193	0.045326	0.069197
0.047448	0.082191	0.072465	0.076407
0.034695	0.073375	0.036379	0.059498
0.047669	0.047333	0.094541	0.091901
	0.071976	0.03579	0.033663
	0.029298		0.030436

## Sheet: Panel C (GREM1 mRNA)
sampleID	disease	GREM1 (-DeltaDeltaCt)
1	donor	-2.10144
2	donor	-0.238722
3	donor	-1.54901
4	donor	2.18977
6	NASH	2.53522
7	NASH	2.94386
8	NASH	2.02738
9	NASH	5.0866
10	ALD	2.12959
11	ALD	0.303687
12	ALD	2.74196
13	ALD	2.1974
14	ALD	1.82116
15	PBC	5.29279
16	PBC	3.44823
17	PBC	2.24844
18	PBC	-0.138624
19	PBC	6.15729
20	PSC	2.93009
21	PSC	2.05593
22	PSC	1.68051
23	PSC	-0.458251
24	PSC	1.67004
25	donor	-3.06195
26	donor	-2.41947
27	donor	4.63787
28	donor	-0.340042
29	donor	2.3814
30	NASH	7.06162
31	NASH	2.87023
32	NASH	2.12573
33	NASH	4.05965
34	NASH	-1.30623
35	ALD	1.41978
36	ALD	1.82308
37	ALD	2.89765
38	ALD	1.653
39	ALD	1.17037
40	PBC	2.81129
41	PBC	4.87776
42	PBC	3.46818
43	PBC	2.71568
44	PBC	2.33997
45	PSC	3.17212
46	PSC	3.13462
47	PSC	4.22289
48	PSC	2.59089
49	donor	4.11688
50	donor	-1.32534
51	donor	0.625913
52	donor	-2.91586
53	NASH	1.10976
54	NASH	2.36823
55	NASH	3.72366
56	NASH	1.78463
57	NASH	1.35408
58	NASH	5.09721
59	ALD	4.91214
60	ALD	2.43233
61	ALD	3.02825
62	ALD	3.93761
63	ALD	1.63009
64	PBC	4.90026
65	PBC	3.16733
66	PBC	1.57392
67	PSC	4.2107
68	PSC	1.1031
69	PSC	3.22937
70	PSC	2.45473

## Sheet: Panel E (GREM1 mRNA)
sample	cell_type	GREM1 (relative expression)
BEC 1	BEC	369.219
BEC 2	BEC	68477.1
BEC 3	BEC	6.26943
HHSC 1-1	HHSC	217904
HHSC 2-1	HHSC	336054
HHSC 3-1	HHSC	108199
HSEC 1	HSEC	7.32756
HSEC 2	HSEC	246.994
HSEC 3	HSEC	52.4668
HepG2 1	HepG2	0.85165
HepG2 2	HepG2	1.40282
HepG2 3	HepG2	0.83702
LX-2 1-1	LX-2	6052.57
LX-2 2-1	LX-2	8619.17
LX-2 3-1	LX-2	8589.35
MF 1-1	MF	95177.5
MF 2-1	MF	53726
MF 3-1	MF	301821
