# Supplementary material for: Evaluation of Gremlin-1 as a therapeutic target in metabolic dysfunction-associated steatohepatitis
Source: eLife. 2024 Oct 3;13:RP95185. doi: 10.7554/eLife.95185 (PMC11449483; doi:10.7554/eLife.95185)
Supplement: Figure 2—source data 1. [file elife-95185-fig2-data1.xlsx]

## Sheet: Panel C (chromatography)
volume_mL	mol_weight	condition	UV
16.6784	72.0093	24	NA
16.7205	65.6712	24	NA
16.7626	60.1671	24	NA
16.8047	57.4374	24	NA
16.8468	54.8683	24	NA
16.8889	53.5127	24	NA
16.931	52.3561	24	NA
16.973	51.1974	24	NA
17.0151	50.6128	24	NA
17.0572	49.9793	24	NA
17.0993	49.0441	24	NA
16.6784	51.7639	0024+Heparin	NA
16.7205	42.7599	0024+Heparin	NA
16.7626	43.8864	0024+Heparin	NA
16.8047	41.5198	0024+Heparin	NA
16.8468	42.3455	0024+Heparin	NA
16.8889	39.7883	0024+Heparin	NA
16.931	42.74	0024+Heparin	NA
16.9731	34.6185	0024+Heparin	NA
17.0151	33.5759	0024+Heparin	NA
17.0572	33.3576	0024+Heparin	NA
17.0993	31.2517	0024+Heparin	NA
15.2138	181.435	24	NA
15.2559	140.491	24	NA
15.298	162.745	24	NA
15.3401	110.443	24	NA
15.3822	144.291	24	NA
15.4243	146.441	24	NA
15.4664	103.432	24	NA
15.5084	214.445	24	NA
15.5505	142.145	24	NA
15.5926	111.987	24	NA
15.6347	151.347	24	NA
15.6768	196.449	24	NA
15.7189	107.864	24	NA
15.761	136.326	24	NA
15.803	165.076	24	NA
15.8451	166.995	24	NA
15.8872	138.598	24	NA
15.9293	128.189	24	NA
15.9714	134.108	24	NA
16.0135	134.634	24	NA
16.0556	125.643	24	NA
16.0977	134.036	24	NA
16.1397	148.014	24	NA
16.1818	128.522	24	NA
15.2391	113.205	0024+Heparin	NA
15.2812	109.167	0024+Heparin	NA
15.3233	108.426	0024+Heparin	NA
15.3654	103.09	0024+Heparin	NA
15.4074	104.063	0024+Heparin	NA
15.4495	101.568	0024+Heparin	NA
15.4916	101.259	0024+Heparin	NA
15.5337	98.7939	0024+Heparin	NA
15.5758	98.264	0024+Heparin	NA
15.6179	97.1411	0024+Heparin	NA
15.66	95.1186	0024+Heparin	NA
15.702	93.2182	0024+Heparin	NA
15.7441	92.3113	0024+Heparin	NA
15.7862	90.4222	0024+Heparin	NA
15.8283	90.2579	0024+Heparin	NA
15.8704	86.6081	0024+Heparin	NA
15.9125	87.0796	0024+Heparin	NA
15.9546	82.0452	0024+Heparin	NA
15.9966	80.251	0024+Heparin	NA
16.0387	76.383	0024+Heparin	NA
16.0808	74.3006	0024+Heparin	NA
16.1229	71.4992	0024+Heparin	NA
16.165	68.3537	0024+Heparin	NA
14.5152	1225.23	24	NA
14.5573	203.888	24	NA
14.5994	531.271	24	NA
14.6415	111.182	24	NA
14.6835	164.613	24	NA
14.7256	175.865	24	NA
14.7677	713.182	24	NA
14.8098	200.655	24	NA
14.8603	897.626	24	NA
14.9024	238.696	24	NA
14.9445	681.167	24	NA
14.9866	190.417	24	NA
14.5405	182.23	0024+Heparin	NA
14.5825	166.076	0024+Heparin	NA
14.6246	143.803	0024+Heparin	NA
14.6667	166.513	0024+Heparin	NA
14.7088	143.283	0024+Heparin	NA
14.7509	149.721	0024+Heparin	NA
14.793	134.314	0024+Heparin	NA
14.8351	139.613	0024+Heparin	NA
14.8771	124.663	0024+Heparin	NA
14.9192	130.225	0024+Heparin	NA
14.9613	130.844	0024+Heparin	NA
0	NA	24	0.00181064
0	NA	0024+Heparin	0.00116772
0.00841728	NA	24	0.00199881
0.00841728	NA	0024+Heparin	0.00130047
0.0168346	NA	24	0.00216303
0.0168346	NA	0024+Heparin	0.00141926
0.0252518	NA	24	0.00230554
0.0252518	NA	0024+Heparin	0.00152382
0.0336691	NA	24	0.00242704
0.0336691	NA	0024+Heparin	0.0016133
0.0420864	NA	24	0.00252776
0.0420864	NA	0024+Heparin	0.00168778
0.0505037	NA	24	0.00260973
0.0505037	NA	0024+Heparin	0.00174935
0.0589209	NA	24	0.00267805
0.0589209	NA	0024+Heparin	0.00180164
0.0673382	NA	24	0.00273796
0.0673382	NA	0024+Heparin	0.00184769
0.0757555	NA	24	0.00279136
0.0757555	NA	0024+Heparin	0.00188901
0.0841728	NA	24	0.00283757
0.0841728	NA	0024+Heparin	0.00192694
0.09259	NA	24	0.00287587
0.09259	NA	0024+Heparin	0.00196315
0.101007	NA	24	0.0029063
0.101007	NA	0024+Heparin	0.00199831
0.109425	NA	24	0.00292921
0.109425	NA	0024+Heparin	0.00203109
0.117842	NA	24	0.00294552
0.117842	NA	0024+Heparin	0.00206005
0.126259	NA	24	0.00295724
0.126259	NA	0024+Heparin	0.00208566
0.134676	NA	24	0.00296649
0.134676	NA	0024+Heparin	0.00210933
0.143094	NA	24	0.00297409
0.143094	NA	0024+Heparin	0.00213124
0.151511	NA	24	0.00297986
0.151511	NA	0024+Heparin	0.00214988
0.159928	NA	24	0.00298382
0.159928	NA	0024+Heparin	0.00216308
0.168346	NA	24	0.00298708
0.168346	NA	0024+Heparin	0.00216983
0.176763	NA	24	0.00299141
0.176763	NA	0024+Heparin	0.00217166
0.18518	NA	24	0.00299817
0.18518	NA	0024+Heparin	0.00217154
0.193597	NA	24	0.0030077
0.193597	NA	0024+Heparin	0.00217159
0.202015	NA	24	0.00302002
0.202015	NA	0024+Heparin	0.00217291
0.210432	NA	24	0.00303507
0.210432	NA	0024+Heparin	0.00217635
0.218849	NA	24	0.00305232
0.218849	NA	0024+Heparin	0.00218183
0.227266	NA	24	0.00307058
0.227266	NA	0024+Heparin	0.00218786
0.235684	NA	24	0.00308847
0.235684	NA	0024+Heparin	0.00219244
0.244101	NA	24	0.00310514
0.244101	NA	0024+Heparin	0.00219442
0.252518	NA	24	0.0031204
0.252518	NA	0024+Heparin	0.00219389
0.260936	NA	24	0.00313395
0.260936	NA	0024+Heparin	0.00219159
0.269353	NA	24	0.00314456
0.269353	NA	0024+Heparin	0.00218794
0.27777	NA	24	0.00315055
0.27777	NA	0024+Heparin	0.00218317
0.286187	NA	24	0.00315101
0.286187	NA	0024+Heparin	0.00217798
0.294605	NA	24	0.00314718
0.294605	NA	0024+Heparin	0.00217349
0.303022	NA	24	0.00314202
0.303022	NA	0024+Heparin	0.00217035
0.311439	NA	24	0.00313791
0.311439	NA	0024+Heparin	0.00216845
0.319857	NA	24	0.00313563
0.319857	NA	0024+Heparin	0.00216777
0.328274	NA	24	0.00313532
0.328274	NA	0024+Heparin	0.00216904
0.336691	NA	24	0.00313678
0.336691	NA	0024+Heparin	0.00217272
0.345108	NA	24	0.00313925
0.345108	NA	0024+Heparin	0.0021777
0.353526	NA	24	0.0031422
0.353526	NA	0024+Heparin	0.0021819
0.361943	NA	24	0.0031462
0.361943	NA	0024+Heparin	0.00218372
0.37036	NA	24	0.00315183
0.37036	NA	0024+Heparin	0.00218305
0.378777	NA	24	0.00315789
0.378777	NA	0024+Heparin	0.00218112
0.387195	NA	24	0.00316146
0.387195	NA	0024+Heparin	0.00217908
0.395612	NA	24	0.00315999
0.395612	NA	0024+Heparin	0.00217733
0.404029	NA	24	0.00315338
0.404029	NA	0024+Heparin	0.00217582
0.412447	NA	24	0.00314371
0.412447	NA	0024+Heparin	0.00217397
0.420864	NA	24	0.00313343
0.420864	NA	0024+Heparin	0.00217087
0.429281	NA	24	0.00312506
0.429281	NA	0024+Heparin	0.00216613
0.437698	NA	24	0.00312133
0.437698	NA	0024+Heparin	0.00216068
0.446116	NA	24	0.00312351
0.446116	NA	0024+Heparin	0.00215645
0.454533	NA	24	0.00313025
0.454533	NA	0024+Heparin	0.00215484
0.46295	NA	24	0.0031387
0.46295	NA	0024+Heparin	0.00215555
0.471368	NA	24	0.00314679
0.471368	NA	0024+Heparin	0.00215718
0.479785	NA	24	0.00315285
0.479785	NA	0024+Heparin	0.00215796
0.488202	NA	24	0.00315569
0.488202	NA	0024+Heparin	0.00215676
0.496619	NA	24	0.00315498
0.496619	NA	0024+Heparin	0.00215387
0.505037	NA	24	0.0031514
0.505037	NA	0024+Heparin	0.0021509
0.513454	NA	24	0.00314621
0.513454	NA	0024+Heparin	0.00214893
0.521871	NA	24	0.00314087
0.521871	NA	0024+Heparin	0.00214745
0.530288	NA	24	0.0031365
0.530288	NA	0024+Heparin	0.00214507
0.538706	NA	24	0.0031332
0.538706	NA	0024+Heparin	0.00214044
0.547123	NA	24	0.00313042
0.547123	NA	0024+Heparin	0.00213301
0.55554	NA	24	0.00312779
0.55554	NA	0024+Heparin	0.00212366
0.563958	NA	24	0.00312527
0.563958	NA	0024+Heparin	0.00211411
0.572375	NA	24	0.003123
0.572375	NA	0024+Heparin	0.0021056
0.580792	NA	24	0.00312122
0.580792	NA	0024+Heparin	0.00209857
0.589209	NA	24	0.00312021
0.589209	NA	0024+Heparin	0.00209278
0.597627	NA	24	0.00312021
0.597627	NA	0024+Heparin	0.00208705
0.606044	NA	24	0.00312161
0.606044	NA	0024+Heparin	0.00207982
0.614461	NA	24	0.00312478
0.614461	NA	0024+Heparin	0.00207029
0.622879	NA	24	0.00312939
0.622879	NA	0024+Heparin	0.00205867
0.631296	NA	24	0.00313462
0.631296	NA	0024+Heparin	0.00204572
0.639713	NA	24	0.00313985
0.639713	NA	0024+Heparin	0.0020332
0.64813	NA	24	0.00314503
0.64813	NA	0024+Heparin	0.00202391
0.656548	NA	24	0.00315026
0.656548	NA	0024+Heparin	0.00201911
0.664965	NA	24	0.00315501
0.664965	NA	0024+Heparin	0.00201684
0.673382	NA	24	0.00315788
0.673382	NA	0024+Heparin	0.00201463
0.681799	NA	24	0.00315674
0.681799	NA	0024+Heparin	0.00201207
0.690217	NA	24	0.00314917
0.690217	NA	0024+Heparin	0.00200961
0.698634	NA	24	0.0031338
0.698634	NA	0024+Heparin	0.00200635
0.707051	NA	24	0.00311181
0.707051	NA	0024+Heparin	0.00200078
0.715469	NA	24	0.00308631
0.715469	NA	0024+Heparin	0.0019928
0.723886	NA	24	0.0030608
0.723886	NA	0024+Heparin	0.00198391
0.732303	NA	24	0.00303918
0.732303	NA	0024+Heparin	0.00197578
0.74072	NA	24	0.00302521
0.74072	NA	0024+Heparin	0.00196962
0.749138	NA	24	0.00301989
0.749138	NA	0024+Heparin	0.00196687
0.757555	NA	24	0.0030203
0.757555	NA	0024+Heparin	0.00196889
0.765972	NA	24	0.00302253
0.765972	NA	0024+Heparin	0.00197519
0.774389	NA	24	0.00302412
0.774389	NA	0024+Heparin	0.00198274
0.782807	NA	24	0.00302367
0.782807	NA	0024+Heparin	0.00198725
0.791224	NA	24	0.00301998
0.791224	NA	0024+Heparin	0.00198528
0.799641	NA	24	0.00301241
0.799641	NA	0024+Heparin	0.00197644
0.808059	NA	24	0.00300199
0.808059	NA	0024+Heparin	0.00196423
0.816476	NA	24	0.00299116
0.816476	NA	0024+Heparin	0.00195303
0.824893	NA	24	0.0029814
0.824893	NA	0024+Heparin	0.0019442
0.83331	NA	24	0.00297162
0.83331	NA	0024+Heparin	0.00193677
0.841728	NA	24	0.00295972
0.841728	NA	0024+Heparin	0.00193072
0.850145	NA	24	0.00294535
0.850145	NA	0024+Heparin	0.00192745
0.858562	NA	24	0.00293056
0.858562	NA	0024+Heparin	0.00192757
0.86698	NA	24	0.00291788
0.86698	NA	0024+Heparin	0.00192955
0.875397	NA	24	0.0029085
0.875397	NA	0024+Heparin	0.00193051
0.883814	NA	24	0.00290204
0.883814	NA	0024+Heparin	0.00192786
0.892231	NA	24	0.00289744
0.892231	NA	0024+Heparin	0.0019214
0.900649	NA	24	0.00289401
0.900649	NA	0024+Heparin	0.0019141
0.909066	NA	24	0.00289262
0.909066	NA	0024+Heparin	0.0019093
0.917483	NA	24	0.00289634
0.917483	NA	0024+Heparin	0.00190768
0.9259	NA	24	0.0029083
0.9259	NA	0024+Heparin	0.00190805
0.934318	NA	24	0.00292762
0.934318	NA	0024+Heparin	0.00190931
0.942735	NA	24	0.00294929
0.942735	NA	0024+Heparin	0.00191086
0.951152	NA	24	0.00296795
0.951152	NA	0024+Heparin	0.00191218
0.95957	NA	24	0.00298023
0.95957	NA	0024+Heparin	0.0019128
0.967987	NA	24	0.00298464
0.967987	NA	0024+Heparin	0.0019126
0.976404	NA	24	0.00298132
0.976404	NA	0024+Heparin	0.001912
0.984821	NA	24	0.0029719
0.984821	NA	0024+Heparin	0.0019119
0.993239	NA	24	0.00295921
0.993239	NA	0024+Heparin	0.00191359
1.00166	NA	24	0.00294618
1.00166	NA	0024+Heparin	0.00191845
1.01007	NA	24	0.00293503
1.01007	NA	0024+Heparin	0.00192701
1.01849	NA	24	0.00292799
1.01849	NA	0024+Heparin	0.00193779
1.02691	NA	24	0.00292659
1.02691	NA	0024+Heparin	0.00194756
1.03533	NA	24	0.00292961
1.03533	NA	0024+Heparin	0.00195313
1.04374	NA	24	0.00293355
1.04374	NA	0024+Heparin	0.00195303
1.05216	NA	24	0.00293595
1.05216	NA	0024+Heparin	0.00194863
1.06058	NA	24	0.00293738
1.06058	NA	0024+Heparin	0.00194348
1.06899	NA	24	0.00294011
1.06899	NA	0024+Heparin	0.00194021
1.07741	NA	24	0.00294518
1.07741	NA	0024+Heparin	0.00193866
1.08583	NA	24	0.00295157
1.08583	NA	0024+Heparin	0.00193718
1.09425	NA	24	0.00295777
1.09425	NA	0024+Heparin	0.00193445
1.10266	NA	24	0.00296306
1.10266	NA	0024+Heparin	0.00193015
1.11108	NA	24	0.00296744
1.11108	NA	0024+Heparin	0.00192513
1.1195	NA	24	0.00297142
1.1195	NA	0024+Heparin	0.00192097
1.12792	NA	24	0.00297563
1.12792	NA	0024+Heparin	0.00191884
1.13633	NA	24	0.00298011
1.13633	NA	0024+Heparin	0.001919
1.14475	NA	24	0.00298415
1.14475	NA	0024+Heparin	0.00192131
1.15317	NA	24	0.00298674
1.15317	NA	0024+Heparin	0.00192559
1.16158	NA	24	0.00298692
1.16158	NA	0024+Heparin	0.00193108
1.17	NA	24	0.00298371
1.17	NA	0024+Heparin	0.00193632
1.17842	NA	24	0.00297625
1.17842	NA	0024+Heparin	0.00193985
1.18684	NA	24	0.00296448
1.18684	NA	0024+Heparin	0.00194135
1.19525	NA	24	0.00294926
1.19525	NA	0024+Heparin	0.00194197
1.20367	NA	24	0.00293135
1.20367	NA	0024+Heparin	0.00194345
1.21209	NA	24	0.00291124
1.21209	NA	0024+Heparin	0.00194653
1.22051	NA	24	0.0028907
1.22051	NA	0024+Heparin	0.00195048
1.22892	NA	24	0.00287309
1.22892	NA	0024+Heparin	0.00195397
1.23734	NA	24	0.00286067
1.23734	NA	0024+Heparin	0.0019561
1.24576	NA	24	0.00285274
1.24576	NA	0024+Heparin	0.00195644
1.25417	NA	24	0.00284722
1.25417	NA	0024+Heparin	0.00195481
1.26259	NA	24	0.00284277
1.26259	NA	0024+Heparin	0.00195146
1.27101	NA	24	0.00283929
1.27101	NA	0024+Heparin	0.0019473
1.27943	NA	24	0.0028375
1.27943	NA	0024+Heparin	0.00194347
1.28784	NA	24	0.0028376
1.28784	NA	0024+Heparin	0.00194053
1.29626	NA	24	0.00283827
1.29626	NA	0024+Heparin	0.0019383
1.30468	NA	24	0.00283816
1.30468	NA	0024+Heparin	0.00193621
1.3131	NA	24	0.00283794
1.3131	NA	0024+Heparin	0.00193395
1.32151	NA	24	0.00283995
1.32151	NA	0024+Heparin	0.001932
1.32993	NA	24	0.00284571
1.32993	NA	0024+Heparin	0.0019317
1.33835	NA	24	0.00285419
1.33835	NA	0024+Heparin	0.00193393
1.34676	NA	24	0.00286323
1.34676	NA	0024+Heparin	0.00193793
1.35518	NA	24	0.00287114
1.35518	NA	0024+Heparin	0.00194214
1.3636	NA	24	0.00287708
1.3636	NA	0024+Heparin	0.00194556
1.37202	NA	24	0.00288069
1.37202	NA	0024+Heparin	0.00194763
1.38043	NA	24	0.00288179
1.38043	NA	0024+Heparin	0.0019476
1.38885	NA	24	0.00287998
1.38885	NA	0024+Heparin	0.00194464
1.39727	NA	24	0.00287478
1.39727	NA	0024+Heparin	0.00193832
1.40569	NA	24	0.00286639
1.40569	NA	0024+Heparin	0.00192929
1.4141	NA	24	0.00285601
1.4141	NA	0024+Heparin	0.00191948
1.42252	NA	24	0.00284479
1.42252	NA	0024+Heparin	0.00191109
1.43094	NA	24	0.00283269
1.43094	NA	0024+Heparin	0.00190506
1.43935	NA	24	0.00281919
1.43935	NA	0024+Heparin	0.00190076
1.44777	NA	24	0.00280556
1.44777	NA	0024+Heparin	0.00189725
1.45619	NA	24	0.00279534
1.45619	NA	0024+Heparin	0.00189427
1.46461	NA	24	0.00279082
1.46461	NA	0024+Heparin	0.00189187
1.47302	NA	24	0.00279074
1.47302	NA	0024+Heparin	0.00188993
1.48144	NA	24	0.00279216
1.48144	NA	0024+Heparin	0.00188809
1.48986	NA	24	0.00279264
1.48986	NA	0024+Heparin	0.00188589
1.49828	NA	24	0.00279011
1.49828	NA	0024+Heparin	0.0018828
1.50669	NA	24	0.00278303
1.50669	NA	0024+Heparin	0.00187891
1.51511	NA	24	0.00277205
1.51511	NA	0024+Heparin	0.00187572
1.52353	NA	24	0.00276042
1.52353	NA	0024+Heparin	0.00187543
1.53194	NA	24	0.00275145
1.53194	NA	0024+Heparin	0.00187894
1.54036	NA	24	0.00274541
1.54036	NA	0024+Heparin	0.0018852
1.54878	NA	24	0.00273978
1.54878	NA	0024+Heparin	0.00189237
1.5572	NA	24	0.00273241
1.5572	NA	0024+Heparin	0.00189886
1.56561	NA	24	0.00272422
1.56561	NA	0024+Heparin	0.00190383
1.57403	NA	24	0.00271837
1.57403	NA	0024+Heparin	0.00190717
1.58245	NA	24	0.00271685
1.58245	NA	0024+Heparin	0.00190889
1.59087	NA	24	0.00271879
1.59087	NA	0024+Heparin	0.0019084
1.59928	NA	24	0.00272181
1.59928	NA	0024+Heparin	0.00190475
1.6077	NA	24	0.00272353
1.6077	NA	0024+Heparin	0.00189758
1.61612	NA	24	0.00272179
1.61612	NA	0024+Heparin	0.00188777
1.62453	NA	24	0.00271512
1.62453	NA	0024+Heparin	0.00187718
1.63295	NA	24	0.0027053
1.63295	NA	0024+Heparin	0.00186803
1.64137	NA	24	0.00269782
1.64137	NA	0024+Heparin	0.00186195
1.64979	NA	24	0.00269651
1.64979	NA	0024+Heparin	0.00185915
1.6582	NA	24	0.00270011
1.6582	NA	0024+Heparin	0.00185814
1.66662	NA	24	0.00270526
1.66662	NA	0024+Heparin	0.00185665
1.67504	NA	24	0.0027098
1.67504	NA	0024+Heparin	0.00185298
1.68346	NA	24	0.0027127
1.68346	NA	0024+Heparin	0.00184688
1.69187	NA	24	0.00271311
1.69187	NA	0024+Heparin	0.00183951
1.70029	NA	24	0.00271024
1.70029	NA	0024+Heparin	0.00183264
1.70871	NA	24	0.00270381
1.70871	NA	0024+Heparin	0.00182823
1.71712	NA	24	0.00269495
1.71712	NA	0024+Heparin	0.00182768
1.72554	NA	24	0.0026867
1.72554	NA	0024+Heparin	0.00183048
1.73396	NA	24	0.00268167
1.73396	NA	0024+Heparin	0.0018345
1.74238	NA	24	0.0026794
1.74238	NA	0024+Heparin	0.0018374
1.75079	NA	24	0.00267707
1.75079	NA	0024+Heparin	0.00183747
1.75921	NA	24	0.00267167
1.75921	NA	0024+Heparin	0.00183424
1.76763	NA	24	0.00266244
1.76763	NA	0024+Heparin	0.0018291
1.77605	NA	24	0.00265262
1.77605	NA	0024+Heparin	0.00182399
1.78446	NA	24	0.00264741
1.78446	NA	0024+Heparin	0.00182005
1.79288	NA	24	0.00264948
1.79288	NA	0024+Heparin	0.0018177
1.8013	NA	24	0.00265766
1.8013	NA	0024+Heparin	0.00181708
1.80971	NA	24	0.00266901
1.80971	NA	0024+Heparin	0.00181786
1.81813	NA	24	0.00268094
1.81813	NA	0024+Heparin	0.00181909
1.82655	NA	24	0.00269171
1.82655	NA	0024+Heparin	0.00181973
1.83497	NA	24	0.00270018
1.83497	NA	0024+Heparin	0.00181912
1.84338	NA	24	0.00270536
1.84338	NA	0024+Heparin	0.00181693
1.8518	NA	24	0.00270709
1.8518	NA	0024+Heparin	0.00181318
1.86022	NA	24	0.00270667
1.86022	NA	0024+Heparin	0.00180842
1.86864	NA	24	0.002706
1.86864	NA	0024+Heparin	0.00180347
1.87705	NA	24	0.00270592
1.87705	NA	0024+Heparin	0.00179882
1.88547	NA	24	0.00270584
1.88547	NA	0024+Heparin	0.00179491
1.89389	NA	24	0.00270425
1.89389	NA	0024+Heparin	0.00179268
1.9023	NA	24	0.00269957
1.9023	NA	0024+Heparin	0.0017923
1.91072	NA	24	0.00269158
1.91072	NA	0024+Heparin	0.00179205
1.91914	NA	24	0.00268193
1.91914	NA	0024+Heparin	0.00179043
1.92756	NA	24	0.00267246
1.92756	NA	0024+Heparin	0.00178859
1.93597	NA	24	0.00266369
1.93597	NA	0024+Heparin	0.00178916
1.94439	NA	24	0.00265568
1.94439	NA	0024+Heparin	0.00179272
1.95281	NA	24	0.00264911
1.95281	NA	0024+Heparin	0.00179697
1.96123	NA	24	0.00264471
1.96123	NA	0024+Heparin	0.00179875
1.96964	NA	24	0.00264203
1.96964	NA	0024+Heparin	0.00179608
1.97806	NA	24	0.00263988
1.97806	NA	0024+Heparin	0.00178964
1.98648	NA	24	0.00263741
1.98648	NA	0024+Heparin	0.00178207
1.99489	NA	24	0.0026343
1.99489	NA	0024+Heparin	0.00177542
2.00331	NA	24	0.00263054
2.00331	NA	0024+Heparin	0.0017701
2.01173	NA	24	0.00262595
2.01173	NA	0024+Heparin	0.00176592
2.02015	NA	24	0.00261979
2.02015	NA	0024+Heparin	0.00176314
2.02856	NA	24	0.00261124
2.02856	NA	0024+Heparin	0.00176244
2.03698	NA	24	0.00260146
2.03698	NA	0024+Heparin	0.00176396
2.0454	NA	24	0.00259372
2.0454	NA	0024+Heparin	0.00176652
2.05382	NA	24	0.00259024
2.05382	NA	0024+Heparin	0.00176841
2.06223	NA	24	0.00259028
2.06223	NA	0024+Heparin	0.00176884
2.07065	NA	24	0.00259184
2.07065	NA	0024+Heparin	0.00176831
2.07907	NA	24	0.00259335
2.07907	NA	0024+Heparin	0.00176752
2.08748	NA	24	0.00259378
2.08748	NA	0024+Heparin	0.00176624
2.0959	NA	24	0.00259215
2.0959	NA	0024+Heparin	0.00176366
2.10432	NA	24	0.00258769
2.10432	NA	0024+Heparin	0.00175968
2.11274	NA	24	0.00258081
2.11274	NA	0024+Heparin	0.00175545
2.12115	NA	24	0.00257336
2.12115	NA	0024+Heparin	0.00175229
2.12957	NA	24	0.0025674
2.12957	NA	0024+Heparin	0.00175069
2.13799	NA	24	0.00256441
2.13799	NA	0024+Heparin	0.00175008
2.14641	NA	24	0.00256552
2.14641	NA	0024+Heparin	0.00174912
2.15482	NA	24	0.00257098
2.15482	NA	0024+Heparin	0.00174674
2.16324	NA	24	0.00257915
2.16324	NA	0024+Heparin	0.00174322
2.17166	NA	24	0.00258682
2.17166	NA	0024+Heparin	0.00173956
2.18007	NA	24	0.00259066
2.18007	NA	0024+Heparin	0.00173608
2.18849	NA	24	0.00258963
2.18849	NA	0024+Heparin	0.00173249
2.19691	NA	24	0.00258596
2.19691	NA	0024+Heparin	0.00172916
2.20533	NA	24	0.00258236
2.20533	NA	0024+Heparin	0.00172709
2.21374	NA	24	0.00257909
2.21374	NA	0024+Heparin	0.00172678
2.22216	NA	24	0.00257456
2.22216	NA	0024+Heparin	0.0017279
2.23058	NA	24	0.00256761
2.23058	NA	0024+Heparin	0.00172967
2.239	NA	24	0.00255956
2.239	NA	0024+Heparin	0.00173119
2.24741	NA	24	0.00255403
2.24741	NA	0024+Heparin	0.00173135
2.25583	NA	24	0.00255332
2.25583	NA	0024+Heparin	0.00172887
2.26425	NA	24	0.00255604
2.26425	NA	0024+Heparin	0.00172289
2.27266	NA	24	0.00255936
2.27266	NA	0024+Heparin	0.00171405
2.28108	NA	24	0.00256166
2.28108	NA	0024+Heparin	0.00170467
2.2895	NA	24	0.00256274
2.2895	NA	0024+Heparin	0.00169692
2.29792	NA	24	0.00256292
2.29792	NA	0024+Heparin	0.00169136
2.30633	NA	24	0.00256284
2.30633	NA	0024+Heparin	0.00168769
2.31475	NA	24	0.00256324
2.31475	NA	0024+Heparin	0.00168589
2.32317	NA	24	0.00256436
2.32317	NA	0024+Heparin	0.00168626
2.33159	NA	24	0.00256578
2.33159	NA	0024+Heparin	0.00168838
2.34	NA	24	0.00256685
2.34	NA	0024+Heparin	0.00169092
2.34842	NA	24	0.00256711
2.34842	NA	0024+Heparin	0.00169255
2.35684	NA	24	0.00256665
2.35684	NA	0024+Heparin	0.00169253
2.36525	NA	24	0.00256605
2.36525	NA	0024+Heparin	0.00169074
2.37367	NA	24	0.00256568
2.37367	NA	0024+Heparin	0.00168781
2.38209	NA	24	0.00256513
2.38209	NA	0024+Heparin	0.00168565
2.39051	NA	24	0.00256318
2.39051	NA	0024+Heparin	0.00168636
2.39892	NA	24	0.00255857
2.39892	NA	0024+Heparin	0.00168974
2.40734	NA	24	0.00255185
2.40734	NA	0024+Heparin	0.00169347
2.41576	NA	24	0.00254595
2.41576	NA	0024+Heparin	0.00169559
2.42418	NA	24	0.00254307
2.42418	NA	0024+Heparin	0.00169602
2.43259	NA	24	0.00254215
2.43259	NA	0024+Heparin	0.00169659
2.44101	NA	24	0.00254034
2.44101	NA	0024+Heparin	0.00169965
2.44943	NA	24	0.00253531
2.44943	NA	0024+Heparin	0.00170598
2.45784	NA	24	0.00252635
2.45784	NA	0024+Heparin	0.00171438
2.46626	NA	24	0.00251504
2.46626	NA	0024+Heparin	0.00172299
2.47468	NA	24	0.00250476
2.47468	NA	0024+Heparin	0.00173051
2.4831	NA	24	0.00249866
2.4831	NA	0024+Heparin	0.00173637
2.49151	NA	24	0.00249782
2.49151	NA	0024+Heparin	0.00174049
2.49993	NA	24	0.00250075
2.49993	NA	0024+Heparin	0.00174283
2.50835	NA	24	0.00250457
2.50835	NA	0024+Heparin	0.00174259
2.51677	NA	24	0.00250686
2.51677	NA	0024+Heparin	0.0017382
2.52518	NA	24	0.00250685
2.52518	NA	0024+Heparin	0.00172981
2.5336	NA	24	0.00250539
2.5336	NA	0024+Heparin	0.00172125
2.54202	NA	24	0.00250382
2.54202	NA	0024+Heparin	0.00171679
2.55043	NA	24	0.0025029
2.55043	NA	0024+Heparin	0.00171681
2.55885	NA	24	0.00250272
2.55885	NA	0024+Heparin	0.00171894
2.56727	NA	24	0.00250325
2.56727	NA	0024+Heparin	0.00172121
2.57569	NA	24	0.002504
2.57569	NA	0024+Heparin	0.00172255
2.5841	NA	24	0.00250363
2.5841	NA	0024+Heparin	0.00172217
2.59252	NA	24	0.00250131
2.59252	NA	0024+Heparin	0.00171948
2.60094	NA	24	0.00249909
2.60094	NA	0024+Heparin	0.00171447
2.60936	NA	24	0.00250089
2.60936	NA	0024+Heparin	0.00170771
2.61777	NA	24	0.0025083
2.61777	NA	0024+Heparin	0.00169958
2.62619	NA	24	0.00251883
2.62619	NA	0024+Heparin	0.00168976
2.63461	NA	24	0.0025283
2.63461	NA	0024+Heparin	0.00167804
2.64303	NA	24	0.00253305
2.64303	NA	0024+Heparin	0.00166596
2.65144	NA	24	0.00253139
2.65144	NA	0024+Heparin	0.00165615
2.65986	NA	24	0.00252487
2.65986	NA	0024+Heparin	0.00164949
2.66828	NA	24	0.00251706
2.66828	NA	0024+Heparin	0.00164472
2.67669	NA	24	0.00251055
2.67669	NA	0024+Heparin	0.00164079
2.68511	NA	24	0.002506
2.68511	NA	0024+Heparin	0.00163796
2.69353	NA	24	0.00250307
2.69353	NA	0024+Heparin	0.00163667
2.70195	NA	24	0.00250123
2.70195	NA	0024+Heparin	0.00163625
2.71036	NA	24	0.00250016
2.71036	NA	0024+Heparin	0.00163556
2.71878	NA	24	0.00249986
2.71878	NA	0024+Heparin	0.00163428
2.7272	NA	24	0.00250045
2.7272	NA	0024+Heparin	0.0016331
2.73562	NA	24	0.00250167
2.73562	NA	0024+Heparin	0.00163286
2.74403	NA	24	0.00250256
2.74403	NA	0024+Heparin	0.001634
2.75245	NA	24	0.00250168
2.75245	NA	0024+Heparin	0.00163669
2.76087	NA	24	0.0024983
2.76087	NA	0024+Heparin	0.00164119
2.76928	NA	24	0.00249351
2.76928	NA	0024+Heparin	0.00164731
2.7777	NA	24	0.00248984
2.7777	NA	0024+Heparin	0.00165375
2.78612	NA	24	0.00248929
2.78612	NA	0024+Heparin	0.00165934
2.79454	NA	24	0.00249174
2.79454	NA	0024+Heparin	0.00166433
2.80295	NA	24	0.00249547
2.80295	NA	0024+Heparin	0.0016694
2.81137	NA	24	0.00249867
2.81137	NA	0024+Heparin	0.00167376
2.81979	NA	24	0.00250002
2.81979	NA	0024+Heparin	0.00167538
2.82821	NA	24	0.00249839
2.82821	NA	0024+Heparin	0.00167252
2.83662	NA	24	0.0024928
2.83662	NA	0024+Heparin	0.00166556
2.84504	NA	24	0.00248323
2.84504	NA	0024+Heparin	0.00165752
2.85346	NA	24	0.00247102
2.85346	NA	0024+Heparin	0.00165219
2.86187	NA	24	0.00245794
2.86187	NA	0024+Heparin	0.00165111
2.87029	NA	24	0.00244527
2.87029	NA	0024+Heparin	0.00165261
2.87871	NA	24	0.00243377
2.87871	NA	0024+Heparin	0.00165401
2.88713	NA	24	0.00242418
2.88713	NA	0024+Heparin	0.00165363
2.89554	NA	24	0.00241749
2.89554	NA	0024+Heparin	0.00165066
2.90396	NA	24	0.00241446
2.90396	NA	0024+Heparin	0.00164441
2.91238	NA	24	0.00241455
2.91238	NA	0024+Heparin	0.00163466
2.9208	NA	24	0.00241604
2.9208	NA	0024+Heparin	0.00162316
2.92921	NA	24	0.00241719
2.92921	NA	0024+Heparin	0.00161372
2.93763	NA	24	0.00241686
2.93763	NA	0024+Heparin	0.0016093
2.94605	NA	24	0.00241453
2.94605	NA	0024+Heparin	0.0016095
2.95446	NA	24	0.00241072
2.95446	NA	0024+Heparin	0.00161143
2.96288	NA	24	0.0024069
2.96288	NA	0024+Heparin	0.00161169
2.9713	NA	24	0.00240421
2.9713	NA	0024+Heparin	0.00160754
2.97972	NA	24	0.00240284
2.97972	NA	0024+Heparin	0.00159773
2.98813	NA	24	0.00240207
2.98813	NA	0024+Heparin	0.0015835
2.99655	NA	24	0.00240048
2.99655	NA	0024+Heparin	0.00156832
3.00497	NA	24	0.00239687
3.00497	NA	0024+Heparin	0.0015556
3.01339	NA	24	0.00239125
3.01339	NA	0024+Heparin	0.00154666
3.0218	NA	24	0.00238472
3.0218	NA	0024+Heparin	0.00154116
3.03022	NA	24	0.00237834
3.03022	NA	0024+Heparin	0.00153802
3.03864	NA	24	0.00237275
3.03864	NA	0024+Heparin	0.00153549
3.04705	NA	24	0.00236867
3.04705	NA	0024+Heparin	0.00153217
3.05547	NA	24	0.00236675
3.05547	NA	0024+Heparin	0.00152844
3.06389	NA	24	0.00236696
3.06389	NA	0024+Heparin	0.00152645
3.07231	NA	24	0.00236883
3.07231	NA	0024+Heparin	0.00152787
3.08072	NA	24	0.00237217
3.08072	NA	0024+Heparin	0.00153209
3.08914	NA	24	0.00237678
3.08914	NA	0024+Heparin	0.00153693
3.09756	NA	24	0.00238198
3.09756	NA	0024+Heparin	0.0015405
3.10598	NA	24	0.00238677
3.10598	NA	0024+Heparin	0.00154201
3.11439	NA	24	0.00239013
3.11439	NA	0024+Heparin	0.00154091
3.12281	NA	24	0.00239085
3.12281	NA	0024+Heparin	0.00153614
3.13123	NA	24	0.0023885
3.13123	NA	0024+Heparin	0.00152743
3.13964	NA	24	0.0023847
3.13964	NA	0024+Heparin	0.00151723
3.14806	NA	24	0.00238217
3.14806	NA	0024+Heparin	0.00150898
3.15648	NA	24	0.00238214
3.15648	NA	0024+Heparin	0.00150381
3.1649	NA	24	0.00238383
3.1649	NA	0024+Heparin	0.00150114
3.17331	NA	24	0.00238589
3.17331	NA	0024+Heparin	0.00150078
3.18173	NA	24	0.00238742
3.18173	NA	0024+Heparin	0.00150249
3.19015	NA	24	0.00238802
3.19015	NA	0024+Heparin	0.00150482
3.19857	NA	24	0.00238727
3.19857	NA	0024+Heparin	0.00150577
3.20698	NA	24	0.00238436
3.20698	NA	0024+Heparin	0.001504
3.2154	NA	24	0.00237862
3.2154	NA	0024+Heparin	0.00149883
3.22382	NA	24	0.00237051
3.22382	NA	0024+Heparin	0.00149024
3.23223	NA	24	0.00236122
3.23223	NA	0024+Heparin	0.00147938
3.24065	NA	24	0.00235142
3.24065	NA	0024+Heparin	0.0014682
3.24907	NA	24	0.00234211
3.24907	NA	0024+Heparin	0.001458
3.25749	NA	24	0.00233604
3.25749	NA	0024+Heparin	0.00144902
3.2659	NA	24	0.00233608
3.2659	NA	0024+Heparin	0.00144134
3.27432	NA	24	0.00234184
3.27432	NA	0024+Heparin	0.00143546
3.28274	NA	24	0.00234961
3.28274	NA	0024+Heparin	0.00143168
3.29116	NA	24	0.0023553
3.29116	NA	0024+Heparin	0.00142939
3.29957	NA	24	0.0023566
3.29957	NA	0024+Heparin	0.00142749
3.30799	NA	24	0.00235341
3.30799	NA	0024+Heparin	0.00142515
3.31641	NA	24	0.00234735
3.31641	NA	0024+Heparin	0.00142168
3.32482	NA	24	0.00234055
3.32482	NA	0024+Heparin	0.00141624
3.33324	NA	24	0.00233469
3.33324	NA	0024+Heparin	0.0014085
3.34166	NA	24	0.00233029
3.34166	NA	0024+Heparin	0.00139945
3.35008	NA	24	0.00232677
3.35008	NA	0024+Heparin	0.0013908
3.35849	NA	24	0.00232319
3.35849	NA	0024+Heparin	0.0013843
3.36691	NA	24	0.00231912
3.36691	NA	0024+Heparin	0.00138103
3.37533	NA	24	0.00231521
3.37533	NA	0024+Heparin	0.00138036
3.38375	NA	24	0.00231259
3.38375	NA	0024+Heparin	0.00137989
3.39216	NA	24	0.00231119
3.39216	NA	0024+Heparin	0.00137695
3.40058	NA	24	0.00230921
3.40058	NA	0024+Heparin	0.00137088
3.409	NA	24	0.0023049
3.409	NA	0024+Heparin	0.00136435
3.41741	NA	24	0.00229834
3.41741	NA	0024+Heparin	0.00136109
3.42583	NA	24	0.00229039
3.42583	NA	0024+Heparin	0.00136202
3.43425	NA	24	0.00228054
3.43425	NA	0024+Heparin	0.00136556
3.44267	NA	24	0.00226723
3.44267	NA	0024+Heparin	0.00137013
3.45108	NA	24	0.00225052
3.45108	NA	0024+Heparin	0.00137455
3.4595	NA	24	0.00223269
3.4595	NA	0024+Heparin	0.00137796
3.46792	NA	24	0.00221617
3.46792	NA	0024+Heparin	0.00138011
3.47634	NA	24	0.0022023
3.47634	NA	0024+Heparin	0.00138134
3.48475	NA	24	0.00219189
3.48475	NA	0024+Heparin	0.00138205
3.49317	NA	24	0.00218587
3.49317	NA	0024+Heparin	0.00138216
3.50159	NA	24	0.00218491
3.50159	NA	0024+Heparin	0.00138072
3.51	NA	24	0.00218883
3.51	NA	0024+Heparin	0.00137602
3.51842	NA	24	0.00219587
3.51842	NA	0024+Heparin	0.00136678
3.52684	NA	24	0.00220272
3.52684	NA	0024+Heparin	0.00135412
3.53526	NA	24	0.0022063
3.53526	NA	0024+Heparin	0.00134148
3.54367	NA	24	0.00220573
3.54367	NA	0024+Heparin	0.00133174
3.55209	NA	24	0.0022022
3.55209	NA	0024+Heparin	0.00132527
3.56051	NA	24	0.00219734
3.56051	NA	0024+Heparin	0.00132132
3.56893	NA	24	0.00219209
3.56893	NA	0024+Heparin	0.0013202
3.57734	NA	24	0.00218669
3.57734	NA	0024+Heparin	0.00132306
3.58576	NA	24	0.00218181
3.58576	NA	0024+Heparin	0.00132957
3.59418	NA	24	0.0021794
3.59418	NA	0024+Heparin	0.00133702
3.60259	NA	24	0.00218155
3.60259	NA	0024+Heparin	0.00134199
3.61101	NA	24	0.00218842
3.61101	NA	0024+Heparin	0.00134249
3.61943	NA	24	0.00219886
3.61943	NA	0024+Heparin	0.00133886
3.62785	NA	24	0.00221214
3.62785	NA	0024+Heparin	0.00133277
3.63626	NA	24	0.00222756
3.63626	NA	0024+Heparin	0.0013255
3.64468	NA	24	0.00224327
3.64468	NA	0024+Heparin	0.00131754
3.6531	NA	24	0.00225688
3.6531	NA	0024+Heparin	0.00130931
3.66152	NA	24	0.00226666
3.66152	NA	0024+Heparin	0.00130152
3.66993	NA	24	0.00227242
3.66993	NA	0024+Heparin	0.00129492
3.67835	NA	24	0.00227536
3.67835	NA	0024+Heparin	0.0012901
3.68677	NA	24	0.00227692
3.68677	NA	0024+Heparin	0.00128724
3.69518	NA	24	0.00227773
3.69518	NA	0024+Heparin	0.00128585
3.7036	NA	24	0.00227767
3.7036	NA	0024+Heparin	0.00128512
3.71202	NA	24	0.00227608
3.71202	NA	0024+Heparin	0.00128438
3.72044	NA	24	0.00227202
3.72044	NA	0024+Heparin	0.0012833
3.72885	NA	24	0.00226536
3.72885	NA	0024+Heparin	0.00128185
3.73727	NA	24	0.00225743
3.73727	NA	0024+Heparin	0.00128018
3.74569	NA	24	0.00224996
3.74569	NA	0024+Heparin	0.00127825
3.75411	NA	24	0.00224371
3.75411	NA	0024+Heparin	0.00127597
3.76252	NA	24	0.00223857
3.76252	NA	0024+Heparin	0.0012738
3.77094	NA	24	0.00223441
3.77094	NA	0024+Heparin	0.00127302
3.77936	NA	24	0.00223161
3.77936	NA	0024+Heparin	0.00127431
3.78777	NA	24	0.00223063
3.78777	NA	0024+Heparin	0.00127666
3.79619	NA	24	0.00223128
3.79619	NA	0024+Heparin	0.00127818
3.80461	NA	24	0.00223252
3.80461	NA	0024+Heparin	0.00127732
3.81303	NA	24	0.00223291
3.81303	NA	0024+Heparin	0.00127354
3.82144	NA	24	0.0022309
3.82144	NA	0024+Heparin	0.00126791
3.82986	NA	24	0.00222518
3.82986	NA	0024+Heparin	0.00126253
3.83828	NA	24	0.00221516
3.83828	NA	0024+Heparin	0.00125912
3.8467	NA	24	0.0022014
3.8467	NA	0024+Heparin	0.00125859
3.85511	NA	24	0.00218586
3.85511	NA	0024+Heparin	0.00126121
3.86353	NA	24	0.00217175
3.86353	NA	0024+Heparin	0.0012662
3.87195	NA	24	0.0021621
3.87195	NA	0024+Heparin	0.00127186
3.88036	NA	24	0.00215785
3.88036	NA	0024+Heparin	0.00127613
3.88878	NA	24	0.00215749
3.88878	NA	0024+Heparin	0.00127708
3.8972	NA	24	0.00215838
3.8972	NA	0024+Heparin	0.0012737
3.90562	NA	24	0.00215823
3.90562	NA	0024+Heparin	0.00126696
3.91403	NA	24	0.00215604
3.91403	NA	0024+Heparin	0.00125933
3.92245	NA	24	0.00215194
3.92245	NA	0024+Heparin	0.00125275
3.93087	NA	24	0.00214667
3.93087	NA	0024+Heparin	0.00124778
3.93929	NA	24	0.00214174
3.93929	NA	0024+Heparin	0.00124404
3.9477	NA	24	0.00213896
3.9477	NA	0024+Heparin	0.00124047
3.95612	NA	24	0.00213861
3.95612	NA	0024+Heparin	0.00123571
3.96454	NA	24	0.00213925
3.96454	NA	0024+Heparin	0.00122862
3.97295	NA	24	0.00213947
3.97295	NA	0024+Heparin	0.00121898
3.98137	NA	24	0.00213896
3.98137	NA	0024+Heparin	0.00120793
3.98979	NA	24	0.00213801
3.98979	NA	0024+Heparin	0.00119725
3.99821	NA	24	0.00213658
3.99821	NA	0024+Heparin	0.00118764
4.00662	NA	24	0.00213431
4.00662	NA	0024+Heparin	0.0011787
4.01504	NA	24	0.00213158
4.01504	NA	0024+Heparin	0.00117025
4.02346	NA	24	0.00213033
4.02346	NA	0024+Heparin	0.00116288
4.03188	NA	24	0.0021324
4.03188	NA	0024+Heparin	0.00115749
4.04029	NA	24	0.00213749
4.04029	NA	0024+Heparin	0.00115473
4.04871	NA	24	0.00214415
4.04871	NA	0024+Heparin	0.00115445
4.05713	NA	24	0.00215192
4.05713	NA	0024+Heparin	0.0011554
4.06554	NA	24	0.00216092
4.06554	NA	0024+Heparin	0.00115605
4.07396	NA	24	0.00217039
4.07396	NA	0024+Heparin	0.00115557
4.08238	NA	24	0.00217861
4.08238	NA	0024+Heparin	0.00115398
4.0908	NA	24	0.00218338
4.0908	NA	0024+Heparin	0.00115178
4.09921	NA	24	0.00218264
4.09921	NA	0024+Heparin	0.00114978
4.10763	NA	24	0.00217682
4.10763	NA	0024+Heparin	0.00114934
4.11605	NA	24	0.00217037
4.11605	NA	0024+Heparin	0.0011523
4.12447	NA	24	0.0021681
4.12447	NA	0024+Heparin	0.00115959
4.13288	NA	24	0.00217053
4.13288	NA	0024+Heparin	0.00116998
4.1413	NA	24	0.00217478
4.1413	NA	0024+Heparin	0.00118053
4.14972	NA	24	0.00217787
4.14972	NA	0024+Heparin	0.00118842
4.15813	NA	24	0.00217806
4.15813	NA	0024+Heparin	0.00119279
4.16655	NA	24	0.00217495
4.16655	NA	0024+Heparin	0.00119506
4.17497	NA	24	0.00216915
4.17497	NA	0024+Heparin	0.00119781
4.18339	NA	24	0.00216095
4.18339	NA	0024+Heparin	0.00120275
4.1918	NA	24	0.00214942
4.1918	NA	0024+Heparin	0.0012091
4.20022	NA	24	0.00213361
4.20022	NA	0024+Heparin	0.00121456
4.20864	NA	24	0.00211447
4.20864	NA	0024+Heparin	0.00121784
4.21706	NA	24	0.00209526
4.21706	NA	0024+Heparin	0.00121963
4.22547	NA	24	0.00207952
4.22547	NA	0024+Heparin	0.00122192
4.23389	NA	24	0.00206803
4.23389	NA	0024+Heparin	0.00122698
4.24231	NA	24	0.00205818
4.24231	NA	0024+Heparin	0.00123542
4.25072	NA	24	0.00204688
4.25072	NA	0024+Heparin	0.00124524
4.25914	NA	24	0.00203403
4.25914	NA	0024+Heparin	0.00125354
4.26756	NA	24	0.00202239
4.26756	NA	0024+Heparin	0.00125822
4.27598	NA	24	0.00201407
4.27598	NA	0024+Heparin	0.00125826
4.28439	NA	24	0.00200871
4.28439	NA	0024+Heparin	0.00125446
4.29281	NA	24	0.00200482
4.29281	NA	0024+Heparin	0.00124988
4.30123	NA	24	0.00200186
4.30123	NA	0024+Heparin	0.00124728
4.30965	NA	24	0.00200089
4.30965	NA	0024+Heparin	0.00124635
4.31806	NA	24	0.00200337
4.31806	NA	0024+Heparin	0.00124493
4.32648	NA	24	0.00200935
4.32648	NA	0024+Heparin	0.00124159
4.3349	NA	24	0.00201724
4.3349	NA	0024+Heparin	0.00123632
4.34331	NA	24	0.00202517
4.34331	NA	0024+Heparin	0.0012299
4.35173	NA	24	0.00203166
4.35173	NA	0024+Heparin	0.00122322
4.36015	NA	24	0.00203574
4.36015	NA	0024+Heparin	0.00121754
4.36857	NA	24	0.00203717
4.36857	NA	0024+Heparin	0.00121464
4.37698	NA	24	0.00203687
4.37698	NA	0024+Heparin	0.00121559
4.3854	NA	24	0.00203707
4.3854	NA	0024+Heparin	0.0012197
4.39382	NA	24	0.00204058
4.39382	NA	0024+Heparin	0.00122559
4.40224	NA	24	0.00204853
4.40224	NA	0024+Heparin	0.00123244
4.41065	NA	24	0.00205889
4.41065	NA	0024+Heparin	0.0012399
4.41907	NA	24	0.00206801
4.41907	NA	0024+Heparin	0.00124744
4.42749	NA	24	0.00207279
4.42749	NA	0024+Heparin	0.00125421
4.43591	NA	24	0.00207198
4.43591	NA	0024+Heparin	0.00125907
4.44432	NA	24	0.00206714
4.44432	NA	0024+Heparin	0.00126084
4.45274	NA	24	0.00206128
4.45274	NA	0024+Heparin	0.0012589
4.46116	NA	24	0.00205623
4.46116	NA	0024+Heparin	0.00125375
4.46957	NA	24	0.00205251
4.46957	NA	0024+Heparin	0.00124667
4.47799	NA	24	0.00205077
4.47799	NA	0024+Heparin	0.00123873
4.48641	NA	24	0.00205152
4.48641	NA	0024+Heparin	0.00123071
4.49483	NA	24	0.00205398
4.49483	NA	0024+Heparin	0.00122344
4.50324	NA	24	0.00205674
4.50324	NA	0024+Heparin	0.00121757
4.51166	NA	24	0.00205874
4.51166	NA	0024+Heparin	0.0012133
4.52008	NA	24	0.00205937
4.52008	NA	0024+Heparin	0.00121044
4.5285	NA	24	0.00205817
4.5285	NA	0024+Heparin	0.0012087
4.53691	NA	24	0.00205503
4.53691	NA	0024+Heparin	0.00120786
4.54533	NA	24	0.00205072
4.54533	NA	0024+Heparin	0.00120766
4.55375	NA	24	0.00204635
4.55375	NA	0024+Heparin	0.00120761
4.56216	NA	24	0.00204223
4.56216	NA	0024+Heparin	0.0012072
4.57058	NA	24	0.00203768
4.57058	NA	0024+Heparin	0.00120609
4.579	NA	24	0.00203181
4.579	NA	0024+Heparin	0.00120408
4.58742	NA	24	0.00202438
4.58742	NA	0024+Heparin	0.00120121
4.59583	NA	24	0.00201664
4.59583	NA	0024+Heparin	0.0011979
4.60425	NA	24	0.00201045
4.60425	NA	0024+Heparin	0.00119497
4.61267	NA	24	0.00200642
4.61267	NA	0024+Heparin	0.00119293
4.62109	NA	24	0.00200384
4.62109	NA	0024+Heparin	0.00119147
4.6295	NA	24	0.00200202
4.6295	NA	0024+Heparin	0.00118965
4.63792	NA	24	0.00200052
4.63792	NA	0024+Heparin	0.00118626
4.64634	NA	24	0.00199871
4.64634	NA	0024+Heparin	0.0011807
4.65475	NA	24	0.00199586
4.65475	NA	0024+Heparin	0.00117378
4.66317	NA	24	0.00199205
4.66317	NA	0024+Heparin	0.00116704
4.67159	NA	24	0.00198883
4.67159	NA	0024+Heparin	0.00116131
4.68001	NA	24	0.00198786
4.68001	NA	0024+Heparin	0.00115659
4.68842	NA	24	0.0019893
4.68842	NA	0024+Heparin	0.00115274
4.69684	NA	24	0.00199201
4.69684	NA	0024+Heparin	0.00114977
4.70526	NA	24	0.00199477
4.70526	NA	0024+Heparin	0.00114744
4.71368	NA	24	0.0019968
4.71368	NA	0024+Heparin	0.00114529
4.72209	NA	24	0.00199759
4.72209	NA	0024+Heparin	0.00114279
4.73051	NA	24	0.00199656
4.73051	NA	0024+Heparin	0.00113966
4.73893	NA	24	0.00199318
4.73893	NA	0024+Heparin	0.00113617
4.74734	NA	24	0.00198838
4.74734	NA	0024+Heparin	0.00113286
4.75576	NA	24	0.00198496
4.75576	NA	0024+Heparin	0.00112992
4.76418	NA	24	0.00198474
4.76418	NA	0024+Heparin	0.00112777
4.7726	NA	24	0.00198664
4.7726	NA	0024+Heparin	0.00112793
4.78101	NA	24	0.0019884
4.78101	NA	0024+Heparin	0.00113164
4.78943	NA	24	0.00198845
4.78943	NA	0024+Heparin	0.00113786
4.79785	NA	24	0.00198579
4.79785	NA	0024+Heparin	0.00114369
4.80627	NA	24	0.00197967
4.80627	NA	0024+Heparin	0.0011461
4.81468	NA	24	0.00197001
4.81468	NA	0024+Heparin	0.00114349
4.8231	NA	24	0.00195755
4.8231	NA	0024+Heparin	0.00113684
4.83152	NA	24	0.0019436
4.83152	NA	0024+Heparin	0.00112895
4.83993	NA	24	0.00192927
4.83993	NA	0024+Heparin	0.00112195
4.84835	NA	24	0.00191465
4.84835	NA	0024+Heparin	0.00111631
4.85677	NA	24	0.00189945
4.85677	NA	0024+Heparin	0.00111152
4.86519	NA	24	0.00188525
4.86519	NA	0024+Heparin	0.00110673
4.8736	NA	24	0.00187565
4.8736	NA	0024+Heparin	0.00110106
4.88202	NA	24	0.0018724
4.88202	NA	0024+Heparin	0.00109409
4.89044	NA	24	0.0018734
4.89044	NA	0024+Heparin	0.00108623
4.89886	NA	24	0.00187508
4.89886	NA	0024+Heparin	0.00107793
4.90727	NA	24	0.00187535
4.90727	NA	0024+Heparin	0.00106887
4.91569	NA	24	0.00187417
4.91569	NA	0024+Heparin	0.00105859
4.92411	NA	24	0.00187236
4.92411	NA	0024+Heparin	0.00104752
4.93252	NA	24	0.0018702
4.93252	NA	0024+Heparin	0.00103682
4.94094	NA	24	0.00186722
4.94094	NA	0024+Heparin	0.00102722
4.94936	NA	24	0.00186295
4.94936	NA	0024+Heparin	0.00101928
4.95778	NA	24	0.00185771
4.95778	NA	0024+Heparin	0.00101491
4.96619	NA	24	0.00185286
4.96619	NA	0024+Heparin	0.00101653
4.97461	NA	24	0.00185015
4.97461	NA	0024+Heparin	0.00102454
4.98303	NA	24	0.00185061
4.98303	NA	0024+Heparin	0.00103699
4.99145	NA	24	0.00185358
4.99145	NA	0024+Heparin	0.00105093
4.99986	NA	24	0.00185696
4.99986	NA	0024+Heparin	0.00106318
5.00828	NA	24	0.00185831
5.00828	NA	0024+Heparin	0.00107163
5.0167	NA	24	0.00185597
5.0167	NA	0024+Heparin	0.00107667
5.02511	NA	24	0.00184941
5.02511	NA	0024+Heparin	0.00108026
5.03353	NA	24	0.0018397
5.03353	NA	0024+Heparin	0.00108348
5.04195	NA	24	0.00182993
5.04195	NA	0024+Heparin	0.00108577
5.05037	NA	24	0.00182398
5.05037	NA	0024+Heparin	0.00108601
5.05878	NA	24	0.00182435
5.05878	NA	0024+Heparin	0.00108351
5.0672	NA	24	0.00183094
5.0672	NA	0024+Heparin	0.00107862
5.07562	NA	24	0.00184095
5.07562	NA	0024+Heparin	0.00107271
5.08404	NA	24	0.00185065
5.08404	NA	0024+Heparin	0.00106738
5.09245	NA	24	0.00185757
5.09245	NA	0024+Heparin	0.0010638
5.10087	NA	24	0.00186105
5.10087	NA	0024+Heparin	0.00106268
5.10929	NA	24	0.00186173
5.10929	NA	0024+Heparin	0.00106392
5.1177	NA	24	0.00186076
5.1177	NA	0024+Heparin	0.00106592
5.12612	NA	24	0.00185944
5.12612	NA	0024+Heparin	0.00106666
5.13454	NA	24	0.00185868
5.13454	NA	0024+Heparin	0.00106571
5.14296	NA	24	0.00185865
5.14296	NA	0024+Heparin	0.00106427
5.15137	NA	24	0.00185915
5.15137	NA	0024+Heparin	0.00106338
5.15979	NA	24	0.00186005
5.15979	NA	0024+Heparin	0.00106277
5.16821	NA	24	0.00186127
5.16821	NA	0024+Heparin	0.00106144
5.17663	NA	24	0.00186261
5.17663	NA	0024+Heparin	0.00105871
5.18504	NA	24	0.00186396
5.18504	NA	0024+Heparin	0.00105522
5.19346	NA	24	0.00186551
5.19346	NA	0024+Heparin	0.00105346
5.20188	NA	24	0.00186794
5.20188	NA	0024+Heparin	0.00105652
5.21029	NA	24	0.00187209
5.21029	NA	0024+Heparin	0.00106502
5.21871	NA	24	0.00187781
5.21871	NA	0024+Heparin	0.001076
5.22713	NA	24	0.00188322
5.22713	NA	0024+Heparin	0.00108542
5.23555	NA	24	0.0018855
5.23555	NA	0024+Heparin	0.00109079
5.24396	NA	24	0.00188262
5.24396	NA	0024+Heparin	0.00109183
5.25238	NA	24	0.00187539
5.25238	NA	0024+Heparin	0.00108975
5.2608	NA	24	0.00186731
5.2608	NA	0024+Heparin	0.00108584
5.26922	NA	24	0.00186153
5.26922	NA	0024+Heparin	0.00108041
5.27763	NA	24	0.00185871
5.27763	NA	0024+Heparin	0.00107333
5.28605	NA	24	0.0018578
5.28605	NA	0024+Heparin	0.00106508
5.29447	NA	24	0.00185766
5.29447	NA	0024+Heparin	0.00105676
5.30288	NA	24	0.00185764
5.30288	NA	0024+Heparin	0.00104956
5.3113	NA	24	0.00185752
5.3113	NA	0024+Heparin	0.00104486
5.31972	NA	24	0.00185706
5.31972	NA	0024+Heparin	0.00104359
5.32814	NA	24	0.00185556
5.32814	NA	0024+Heparin	0.00104501
5.33655	NA	24	0.00185213
5.33655	NA	0024+Heparin	0.00104717
5.34497	NA	24	0.00184701
5.34497	NA	0024+Heparin	0.00104891
5.35339	NA	24	0.00184199
5.35339	NA	0024+Heparin	0.00105125
5.36181	NA	24	0.00183864
5.36181	NA	0024+Heparin	0.00105609
5.37022	NA	24	0.00183708
5.37022	NA	0024+Heparin	0.00106351
5.37864	NA	24	0.00183656
5.37864	NA	0024+Heparin	0.00107151
5.38706	NA	24	0.00183637
5.38706	NA	0024+Heparin	0.00107784
5.39547	NA	24	0.00183642
5.39547	NA	0024+Heparin	0.00108081
5.40389	NA	24	0.00183712
5.40389	NA	0024+Heparin	0.0010795
5.41231	NA	24	0.00183837
5.41231	NA	0024+Heparin	0.00107428
5.42073	NA	24	0.00183878
5.42073	NA	0024+Heparin	0.00106677
5.42914	NA	24	0.00183597
5.42914	NA	0024+Heparin	0.00105857
5.43756	NA	24	0.00182804
5.43756	NA	0024+Heparin	0.00105077
5.44598	NA	24	0.00181603
5.44598	NA	0024+Heparin	0.00104432
5.4544	NA	24	0.00180461
5.4544	NA	0024+Heparin	0.00103986
5.46281	NA	24	0.00179779
5.46281	NA	0024+Heparin	0.00103725
5.47123	NA	24	0.00179486
5.47123	NA	0024+Heparin	0.00103571
5.47965	NA	24	0.00179193
5.47965	NA	0024+Heparin	0.00103414
5.48806	NA	24	0.00178526
5.48806	NA	0024+Heparin	0.00103173
5.49648	NA	24	0.00177398
5.49648	NA	0024+Heparin	0.001029
5.5049	NA	24	0.00176138
5.5049	NA	0024+Heparin	0.00102776
5.51332	NA	24	0.00175189
5.51332	NA	0024+Heparin	0.00102924
5.52173	NA	24	0.00174618
5.52173	NA	0024+Heparin	0.00103234
5.53015	NA	24	0.00174082
5.53015	NA	0024+Heparin	0.00103437
5.53857	NA	24	0.00173276
5.53857	NA	0024+Heparin	0.00103341
5.54699	NA	24	0.00172246
5.54699	NA	0024+Heparin	0.00103025
5.5554	NA	24	0.00171275
5.5554	NA	0024+Heparin	0.00102759
5.56382	NA	24	0.00170544
5.56382	NA	0024+Heparin	0.00102707
5.57224	NA	24	0.00170061
5.57224	NA	0024+Heparin	0.00102822
5.58065	NA	24	0.00169814
5.58065	NA	0024+Heparin	0.00102974
5.58907	NA	24	0.0016981
5.58907	NA	0024+Heparin	0.00103026
5.59749	NA	24	0.00170016
5.59749	NA	0024+Heparin	0.0010286
5.60591	NA	24	0.00170349
5.60591	NA	0024+Heparin	0.00102494
5.61432	NA	24	0.00170725
5.61432	NA	0024+Heparin	0.00102117
5.62274	NA	24	0.00171097
5.62274	NA	0024+Heparin	0.00101872
5.63116	NA	24	0.00171446
5.63116	NA	0024+Heparin	0.0010172
5.63958	NA	24	0.00171745
5.63958	NA	0024+Heparin	0.00101535
5.64799	NA	24	0.00171942
5.64799	NA	0024+Heparin	0.00101192
5.65641	NA	24	0.00171949
5.65641	NA	0024+Heparin	0.00100599
5.66483	NA	24	0.00171635
5.66483	NA	0024+Heparin	0.000997776
5.67324	NA	24	0.00170903
5.67324	NA	0024+Heparin	0.000989364
5.68166	NA	24	0.00169828
5.68166	NA	0024+Heparin	0.000983401
5.69008	NA	24	0.00168672
5.69008	NA	0024+Heparin	0.00098097
5.6985	NA	24	0.00167729
5.6985	NA	0024+Heparin	0.000981995
5.70691	NA	24	0.00167215
5.70691	NA	0024+Heparin	0.000985892
5.71533	NA	24	0.00167166
5.71533	NA	0024+Heparin	0.000990971
5.72375	NA	24	0.0016735
5.72375	NA	0024+Heparin	0.000995011
5.73217	NA	24	0.00167417
5.73217	NA	0024+Heparin	0.000996355
5.74058	NA	24	0.00167143
5.74058	NA	0024+Heparin	0.000994417
5.749	NA	24	0.00166623
5.749	NA	0024+Heparin	0.000990303
5.75742	NA	24	0.0016623
5.75742	NA	0024+Heparin	0.000986422
5.76583	NA	24	0.00166236
5.76583	NA	0024+Heparin	0.000984483
5.77425	NA	24	0.00166527
5.77425	NA	0024+Heparin	0.000984712
5.78267	NA	24	0.00166704
5.78267	NA	0024+Heparin	0.000986961
5.79109	NA	24	0.00166314
5.79109	NA	0024+Heparin	0.000991169
5.7995	NA	24	0.00165171
5.7995	NA	0024+Heparin	0.000996535
5.80792	NA	24	0.00163632
5.80792	NA	0024+Heparin	0.00100126
5.81634	NA	24	0.00162353
5.81634	NA	0024+Heparin	0.00100373
5.82476	NA	24	0.00161732
5.82476	NA	0024+Heparin	0.00100358
5.83317	NA	24	0.0016172
5.83317	NA	0024+Heparin	0.00100172
5.84159	NA	24	0.00162051
5.84159	NA	0024+Heparin	0.000999325
5.85001	NA	24	0.00162483
5.85001	NA	0024+Heparin	0.000996885
5.85842	NA	24	0.0016288
5.85842	NA	0024+Heparin	0.000993773
5.86684	NA	24	0.0016322
5.86684	NA	0024+Heparin	0.000988471
5.87526	NA	24	0.00163538
5.87526	NA	0024+Heparin	0.000979808
5.88368	NA	24	0.00163872
5.88368	NA	0024+Heparin	0.000968748
5.89209	NA	24	0.00164251
5.89209	NA	0024+Heparin	0.000958251
5.90051	NA	24	0.00164672
5.90051	NA	0024+Heparin	0.000950784
5.90893	NA	24	0.00165052
5.90893	NA	0024+Heparin	0.00094713
5.91735	NA	24	0.00165239
5.91735	NA	0024+Heparin	0.000946961
5.92576	NA	24	0.00165075
5.92576	NA	0024+Heparin	0.0009491
5.93418	NA	24	0.00164442
5.93418	NA	0024+Heparin	0.000951847
5.9426	NA	24	0.00163274
5.9426	NA	0024+Heparin	0.000953467
5.95101	NA	24	0.00161631
5.95101	NA	0024+Heparin	0.00095256
5.95943	NA	24	0.00159839
5.95943	NA	0024+Heparin	0.000948961
5.96785	NA	24	0.00158359
5.96785	NA	0024+Heparin	0.000944074
5.97627	NA	24	0.00157373
5.97627	NA	0024+Heparin	0.000939617
5.98468	NA	24	0.00156702
5.98468	NA	0024+Heparin	0.000936939
5.9931	NA	24	0.00156061
5.9931	NA	0024+Heparin	0.00093701
6.00152	NA	24	0.00155272
6.00152	NA	0024+Heparin	0.000939792
6.00994	NA	24	0.00154394
6.00994	NA	0024+Heparin	0.000944228
6.01835	NA	24	0.00153691
6.01835	NA	0024+Heparin	0.000949157
6.02677	NA	24	0.00153373
6.02677	NA	0024+Heparin	0.000953698
6.03519	NA	24	0.00153422
6.03519	NA	0024+Heparin	0.000956904
6.0436	NA	24	0.0015368
6.0436	NA	0024+Heparin	0.000957685
6.05202	NA	24	0.00153988
6.05202	NA	0024+Heparin	0.000955364
6.06044	NA	24	0.00154263
6.06044	NA	0024+Heparin	0.000950511
6.06886	NA	24	0.00154537
6.06886	NA	0024+Heparin	0.000945135
6.07727	NA	24	0.00154874
6.07727	NA	0024+Heparin	0.00094141
6.08569	NA	24	0.00155244
6.08569	NA	0024+Heparin	0.000940504
6.09411	NA	24	0.00155528
6.09411	NA	0024+Heparin	0.000942783
6.10253	NA	24	0.00155574
6.10253	NA	0024+Heparin	0.000947912
6.11094	NA	24	0.00155272
6.11094	NA	0024+Heparin	0.000954409
6.11936	NA	24	0.00154665
6.11936	NA	0024+Heparin	0.000960072
6.12778	NA	24	0.00154025
6.12778	NA	0024+Heparin	0.000963165
6.1362	NA	24	0.00153731
6.1362	NA	0024+Heparin	0.000963063
6.14461	NA	24	0.0015399
6.14461	NA	0024+Heparin	0.000959957
6.15303	NA	24	0.00154666
6.15303	NA	0024+Heparin	0.000954114
6.16145	NA	24	0.00155462
6.16145	NA	0024+Heparin	0.000946248
6.16986	NA	24	0.00156198
6.16986	NA	0024+Heparin	0.000937954
6.17828	NA	24	0.00156865
6.17828	NA	0024+Heparin	0.000930407
6.1867	NA	24	0.00157455
6.1867	NA	0024+Heparin	0.000923438
6.19512	NA	24	0.00157824
6.19512	NA	0024+Heparin	0.000916621
6.20353	NA	24	0.00157807
6.20353	NA	0024+Heparin	0.000910506
6.21195	NA	24	0.00157418
6.21195	NA	0024+Heparin	0.000906305
6.22037	NA	24	0.00156869
6.22037	NA	0024+Heparin	0.000904531
6.22879	NA	24	0.00156362
6.22879	NA	0024+Heparin	0.000904389
6.2372	NA	24	0.00155915
6.2372	NA	0024+Heparin	0.000904319
6.24562	NA	24	0.00155454
6.24562	NA	0024+Heparin	0.000902687
6.25404	NA	24	0.00154978
6.25404	NA	0024+Heparin	0.000898416
6.26245	NA	24	0.00154567
6.26245	NA	0024+Heparin	0.000891767
6.27087	NA	24	0.00154266
6.27087	NA	0024+Heparin	0.000884203
6.27929	NA	24	0.00154028
6.27929	NA	0024+Heparin	0.000876757
6.28771	NA	24	0.00153801
6.28771	NA	0024+Heparin	0.000869178
6.29612	NA	24	0.00153618
6.29612	NA	0024+Heparin	0.000860689
6.30454	NA	24	0.00153569
6.30454	NA	0024+Heparin	0.000851213
6.31296	NA	24	0.00153645
6.31296	NA	0024+Heparin	0.000842175
6.32138	NA	24	0.00153678
6.32138	NA	0024+Heparin	0.000835535
6.32979	NA	24	0.00153501
6.32979	NA	0024+Heparin	0.000831819
6.33821	NA	24	0.00153115
6.33821	NA	0024+Heparin	0.000830088
6.34663	NA	24	0.00152689
6.34663	NA	0024+Heparin	0.000829425
6.35504	NA	24	0.00152366
6.35504	NA	0024+Heparin	0.000829618
6.36346	NA	24	0.00152133
6.36346	NA	0024+Heparin	0.000830723
6.37188	NA	24	0.00151902
6.37188	NA	0024+Heparin	0.000832295
6.3803	NA	24	0.00151659
6.3803	NA	0024+Heparin	0.000833205
6.38871	NA	24	0.0015144
6.38871	NA	0024+Heparin	0.000832279
6.39713	NA	24	0.00151185
6.39713	NA	0024+Heparin	0.000829035
6.40555	NA	24	0.0015075
6.40555	NA	0024+Heparin	0.000824173
6.41397	NA	24	0.00150072
6.41397	NA	0024+Heparin	0.000819191
6.42238	NA	24	0.00149316
6.42238	NA	0024+Heparin	0.000815135
6.4308	NA	24	0.00148742
6.4308	NA	0024+Heparin	0.000812188
6.43922	NA	24	0.00148426
6.43922	NA	0024+Heparin	0.000810449
6.44763	NA	24	0.00148223
6.44763	NA	0024+Heparin	0.000810052
6.45605	NA	24	0.00147937
6.45605	NA	0024+Heparin	0.000810495
6.46447	NA	24	0.00147425
6.46447	NA	0024+Heparin	0.000810816
6.47289	NA	24	0.00146684
6.47289	NA	0024+Heparin	0.000810399
6.4813	NA	24	0.00145837
6.4813	NA	0024+Heparin	0.000809314
6.48972	NA	24	0.00144982
6.48972	NA	0024+Heparin	0.00080784
6.49814	NA	24	0.00144122
6.49814	NA	0024+Heparin	0.000805688
6.50656	NA	24	0.00143271
6.50656	NA	0024+Heparin	0.000802005
6.51497	NA	24	0.00142516
6.51497	NA	0024+Heparin	0.000796467
6.52339	NA	24	0.0014196
6.52339	NA	0024+Heparin	0.0007904
6.53181	NA	24	0.00141672
6.53181	NA	0024+Heparin	0.000785972
6.54022	NA	24	0.00141675
6.54022	NA	0024+Heparin	0.000783937
6.54864	NA	24	0.00141924
6.54864	NA	0024+Heparin	0.000783378
6.55706	NA	24	0.00142323
6.55706	NA	0024+Heparin	0.000783256
6.56548	NA	24	0.00142763
6.56548	NA	0024+Heparin	0.000783157
6.57389	NA	24	0.00143174
6.57389	NA	0024+Heparin	0.00078298
6.58231	NA	24	0.00143531
6.58231	NA	0024+Heparin	0.000782573
6.59073	NA	24	0.00143834
6.59073	NA	0024+Heparin	0.000781661
6.59915	NA	24	0.0014411
6.59915	NA	0024+Heparin	0.000779952
6.60756	NA	24	0.00144435
6.60756	NA	0024+Heparin	0.00077727
6.61598	NA	24	0.00144864
6.61598	NA	0024+Heparin	0.000773718
6.6244	NA	24	0.0014534
6.6244	NA	0024+Heparin	0.000769613
6.63281	NA	24	0.00145722
6.63281	NA	0024+Heparin	0.00076518
6.64123	NA	24	0.00145916
6.64123	NA	0024+Heparin	0.0007604
6.64965	NA	24	0.0014596
6.64965	NA	0024+Heparin	0.000755167
6.65807	NA	24	0.00145975
6.65807	NA	0024+Heparin	0.000749449
6.66648	NA	24	0.00145989
6.66648	NA	0024+Heparin	0.000743196
6.6749	NA	24	0.00145835
6.6749	NA	0024+Heparin	0.000735798
6.68332	NA	24	0.00145218
6.68332	NA	0024+Heparin	0.000725792
6.69174	NA	24	0.00144041
6.69174	NA	0024+Heparin	0.000711976
6.70015	NA	24	0.00142777
6.70015	NA	0024+Heparin	0.000694879
6.70857	NA	24	0.00142169
6.70857	NA	0024+Heparin	0.000676694
6.71699	NA	24	0.00142445
6.71699	NA	0024+Heparin	0.000660541
6.7254	NA	24	0.00143163
6.7254	NA	0024+Heparin	0.000649192
6.73382	NA	24	0.00143729
6.73382	NA	0024+Heparin	0.000643364
6.74224	NA	24	0.00143748
6.74224	NA	0024+Heparin	0.000641859
6.75066	NA	24	0.00143072
6.75066	NA	0024+Heparin	0.000643594
6.75907	NA	24	0.00141822
6.75907	NA	0024+Heparin	0.000648677
6.76749	NA	24	0.00140312
6.76749	NA	0024+Heparin	0.000656943
6.77591	NA	24	0.00138846
6.77591	NA	0024+Heparin	0.000666371
6.78433	NA	24	0.00137586
6.78433	NA	0024+Heparin	0.000673995
6.79274	NA	24	0.00136599
6.79274	NA	0024+Heparin	0.000677498
6.80116	NA	24	0.00135955
6.80116	NA	0024+Heparin	0.000676152
6.80958	NA	24	0.00135702
6.80958	NA	0024+Heparin	0.000671064
6.81799	NA	24	0.0013578
6.81799	NA	0024+Heparin	0.000664079
6.82641	NA	24	0.00136118
6.82641	NA	0024+Heparin	0.000656497
6.83483	NA	24	0.0013672
6.83483	NA	0024+Heparin	0.000648925
6.84325	NA	24	0.00137567
6.84325	NA	0024+Heparin	0.000641596
6.85166	NA	24	0.00138528
6.85166	NA	0024+Heparin	0.000634692
6.86008	NA	24	0.00139404
6.86008	NA	0024+Heparin	0.000628528
6.8685	NA	24	0.00140026
6.8685	NA	0024+Heparin	0.000623359
6.87692	NA	24	0.00140324
6.87692	NA	0024+Heparin	0.000619148
6.88533	NA	24	0.00140374
6.88533	NA	0024+Heparin	0.000615776
6.89375	NA	24	0.00140342
6.89375	NA	0024+Heparin	0.000613368
6.90217	NA	24	0.00140374
6.90217	NA	0024+Heparin	0.000612013
6.91058	NA	24	0.00140554
6.91058	NA	0024+Heparin	0.00061132
6.919	NA	24	0.001409
6.919	NA	0024+Heparin	0.000610786
6.92742	NA	24	0.00141368
6.92742	NA	0024+Heparin	0.000610632
6.93584	NA	24	0.0014185
6.93584	NA	0024+Heparin	0.000611968
6.94425	NA	24	0.00142209
6.94425	NA	0024+Heparin	0.000615901
6.95267	NA	24	0.00142299
6.95267	NA	0024+Heparin	0.000622304
6.96109	NA	24	0.00141975
6.96109	NA	0024+Heparin	0.000629665
6.96951	NA	24	0.00141212
6.96951	NA	0024+Heparin	0.000636169
6.97792	NA	24	0.00140184
6.97792	NA	0024+Heparin	0.000640377
6.98634	NA	24	0.00139166
6.98634	NA	0024+Heparin	0.000641123
6.99476	NA	24	0.00138406
6.99476	NA	0024+Heparin	0.000638034
7.00317	NA	24	0.00138047
7.00317	NA	0024+Heparin	0.000632694
7.01159	NA	24	0.00138086
7.01159	NA	0024+Heparin	0.000627901
7.02001	NA	24	0.00138449
7.02001	NA	0024+Heparin	0.000625089
7.02843	NA	24	0.00139038
7.02843	NA	0024+Heparin	0.000624317
7.03684	NA	24	0.00139684
7.03684	NA	0024+Heparin	0.000626057
7.04526	NA	24	0.00140204
7.04526	NA	0024+Heparin	0.000630574
7.05368	NA	24	0.00140488
7.05368	NA	0024+Heparin	0.000636301
7.0621	NA	24	0.00140528
7.0621	NA	0024+Heparin	0.000640656
7.07051	NA	24	0.00140368
7.07051	NA	0024+Heparin	0.000641713
7.07893	NA	24	0.0013998
7.07893	NA	0024+Heparin	0.000638925
7.08735	NA	24	0.00139213
7.08735	NA	0024+Heparin	0.000633257
7.09576	NA	24	0.00137982
7.09576	NA	0024+Heparin	0.000626473
7.10418	NA	24	0.00136512
7.10418	NA	0024+Heparin	0.000619795
7.1126	NA	24	0.0013522
7.1126	NA	0024+Heparin	0.000613511
7.12102	NA	24	0.00134344
7.12102	NA	0024+Heparin	0.000607637
7.12943	NA	24	0.00133825
7.12943	NA	0024+Heparin	0.000602673
7.13785	NA	24	0.00133417
7.13785	NA	0024+Heparin	0.000599904
7.14627	NA	24	0.00132808
7.14627	NA	0024+Heparin	0.000600806
7.15469	NA	24	0.00131714
7.15469	NA	0024+Heparin	0.000605863
7.1631	NA	24	0.00130017
7.1631	NA	0024+Heparin	0.000613904
7.17152	NA	24	0.00127959
7.17152	NA	0024+Heparin	0.000622707
7.17994	NA	24	0.00126105
7.17994	NA	0024+Heparin	0.000630466
7.18835	NA	24	0.00124943
7.18835	NA	0024+Heparin	0.000636869
7.19677	NA	24	0.00124563
7.19677	NA	0024+Heparin	0.000643014
7.20519	NA	24	0.00124749
7.20519	NA	0024+Heparin	0.000649976
7.21361	NA	24	0.00125258
7.21361	NA	0024+Heparin	0.000657324
7.22202	NA	24	0.00126013
7.22202	NA	0024+Heparin	0.000663425
7.23044	NA	24	0.00127103
7.23044	NA	0024+Heparin	0.000666459
7.23886	NA	24	0.00128595
7.23886	NA	0024+Heparin	0.000664854
7.24728	NA	24	0.00130305
7.24728	NA	0024+Heparin	0.000658526
7.25569	NA	24	0.001318
7.25569	NA	0024+Heparin	0.000649857
7.26411	NA	24	0.00132522
7.26411	NA	0024+Heparin	0.000641776
7.27253	NA	24	0.00131981
7.27253	NA	0024+Heparin	0.000635467
7.28094	NA	24	0.00130173
7.28094	NA	0024+Heparin	0.000630333
7.28936	NA	24	0.00127789
7.28936	NA	0024+Heparin	0.000625114
7.29778	NA	24	0.00125752
7.29778	NA	0024+Heparin	0.000619431
7.3062	NA	24	0.00124522
7.3062	NA	0024+Heparin	0.000615136
7.31461	NA	24	0.00124007
7.31461	NA	0024+Heparin	0.000615092
7.32303	NA	24	0.00123891
7.32303	NA	0024+Heparin	0.000619684
7.33145	NA	24	0.00123822
7.33145	NA	0024+Heparin	0.000625829
7.33987	NA	24	0.0012351
7.33987	NA	0024+Heparin	0.000629725
7.34828	NA	24	0.00122827
7.34828	NA	0024+Heparin	0.000629245
7.3567	NA	24	0.00121832
7.3567	NA	0024+Heparin	0.000624314
7.36512	NA	24	0.00120684
7.36512	NA	0024+Heparin	0.000616529
7.37353	NA	24	0.00119559
7.37353	NA	0024+Heparin	0.00060835
7.38195	NA	24	0.0011864
7.38195	NA	0024+Heparin	0.00060168
7.39037	NA	24	0.00118085
7.39037	NA	0024+Heparin	0.000596779
7.39879	NA	24	0.00117966
7.39879	NA	0024+Heparin	0.000592372
7.4072	NA	24	0.0011829
7.4072	NA	0024+Heparin	0.000586557
7.41562	NA	24	0.00119005
7.41562	NA	0024+Heparin	0.000578107
7.42404	NA	24	0.00119927
7.42404	NA	0024+Heparin	0.000567935
7.43246	NA	24	0.00120793
7.43246	NA	0024+Heparin	0.000559317
7.44087	NA	24	0.00121439
7.44087	NA	0024+Heparin	0.000555173
7.44929	NA	24	0.00121894
7.44929	NA	0024+Heparin	0.000555625
7.45771	NA	24	0.0012222
7.45771	NA	0024+Heparin	0.000559405
7.46612	NA	24	0.00122289
7.46612	NA	0024+Heparin	0.000565354
7.47454	NA	24	0.00121844
7.47454	NA	0024+Heparin	0.000571737
7.48296	NA	24	0.00120738
7.48296	NA	0024+Heparin	0.000576059
7.49138	NA	24	0.00119122
7.49138	NA	0024+Heparin	0.00057614
7.49979	NA	24	0.00117371
7.49979	NA	0024+Heparin	0.000571952
7.50821	NA	24	0.00115797
7.50821	NA	0024+Heparin	0.000566429
7.51663	NA	24	0.00114501
7.51663	NA	0024+Heparin	0.000562725
7.52505	NA	24	0.00113463
7.52505	NA	0024+Heparin	0.00056116
7.53346	NA	24	0.00112675
7.53346	NA	0024+Heparin	0.000560059
7.54188	NA	24	0.00112175
7.54188	NA	0024+Heparin	0.000558244
7.5503	NA	24	0.00111941
7.5503	NA	0024+Heparin	0.000555897
7.55871	NA	24	0.00111809
7.55871	NA	0024+Heparin	0.000553921
7.56713	NA	24	0.00111551
7.56713	NA	0024+Heparin	0.000552899
7.57555	NA	24	0.00110974
7.57555	NA	0024+Heparin	0.000552644
7.58397	NA	24	0.00110012
7.58397	NA	0024+Heparin	0.000552439
7.59238	NA	24	0.00108879
7.59238	NA	0024+Heparin	0.000551457
7.6008	NA	24	0.00108035
7.6008	NA	0024+Heparin	0.000548875
7.60922	NA	24	0.00107799
7.60922	NA	0024+Heparin	0.000543862
7.61764	NA	24	0.0010809
7.61764	NA	0024+Heparin	0.000536241
7.62605	NA	24	0.00108654
7.62605	NA	0024+Heparin	0.00052793
7.63447	NA	24	0.00109319
7.63447	NA	0024+Heparin	0.000522564
7.64289	NA	24	0.00110016
7.64289	NA	0024+Heparin	0.000522035
7.6513	NA	24	0.0011067
7.6513	NA	0024+Heparin	0.000524756
7.65972	NA	24	0.00111137
7.65972	NA	0024+Heparin	0.000527809
7.66814	NA	24	0.00111252
7.66814	NA	0024+Heparin	0.000528988
7.67656	NA	24	0.00110913
7.67656	NA	0024+Heparin	0.000527365
7.68497	NA	24	0.00110117
7.68497	NA	0024+Heparin	0.000523472
7.69339	NA	24	0.00108959
7.69339	NA	0024+Heparin	0.000518812
7.70181	NA	24	0.00107599
7.70181	NA	0024+Heparin	0.000515284
7.71023	NA	24	0.00106184
7.71023	NA	0024+Heparin	0.000514846
7.71864	NA	24	0.00104805
7.71864	NA	0024+Heparin	0.000518382
7.72706	NA	24	0.00103504
7.72706	NA	0024+Heparin	0.000524543
7.73548	NA	24	0.00102292
7.73548	NA	0024+Heparin	0.000530434
7.74389	NA	24	0.0010117
7.74389	NA	0024+Heparin	0.000533367
7.75231	NA	24	0.00100167
7.75231	NA	0024+Heparin	0.000531921
7.76073	NA	24	0.000993977
7.76073	NA	0024+Heparin	0.000526445
7.76915	NA	24	0.000990948
7.76915	NA	0024+Heparin	0.00051948
7.77756	NA	24	0.000994216
7.77756	NA	0024+Heparin	0.000514492
7.78598	NA	24	0.00100235
7.78598	NA	0024+Heparin	0.000513142
7.7944	NA	24	0.00101211
7.7944	NA	0024+Heparin	0.000514626
7.80282	NA	24	0.00102106
7.80282	NA	0024+Heparin	0.000517462
7.81123	NA	24	0.00102807
7.81123	NA	0024+Heparin	0.000520713
7.81965	NA	24	0.00103252
7.81965	NA	0024+Heparin	0.00052385
7.82807	NA	24	0.00103415
7.82807	NA	0024+Heparin	0.000526239
7.83648	NA	24	0.00103384
7.83648	NA	0024+Heparin	0.000526905
7.8449	NA	24	0.00103398
7.8449	NA	0024+Heparin	0.000524678
7.85332	NA	24	0.0010366
7.85332	NA	0024+Heparin	0.000518785
7.86174	NA	24	0.00104109
7.86174	NA	0024+Heparin	0.000509553
7.87015	NA	24	0.00104555
7.87015	NA	0024+Heparin	0.000498742
7.87857	NA	24	0.00104978
7.87857	NA	0024+Heparin	0.00048955
7.88699	NA	24	0.00105562
7.88699	NA	0024+Heparin	0.000485437
7.89541	NA	24	0.00106448
7.89541	NA	0024+Heparin	0.000487592
7.90382	NA	24	0.00107576
7.90382	NA	0024+Heparin	0.000494043
7.91224	NA	24	0.00108773
7.91224	NA	0024+Heparin	0.000501657
7.92066	NA	24	0.001099
7.92066	NA	0024+Heparin	0.000508335
7.92908	NA	24	0.00110901
7.92908	NA	0024+Heparin	0.000513778
7.93749	NA	24	0.00111747
7.93749	NA	0024+Heparin	0.000519147
7.94591	NA	24	0.00112386
7.94591	NA	0024+Heparin	0.000525546
7.95433	NA	24	0.00112715
7.95433	NA	0024+Heparin	0.000532371
7.96274	NA	24	0.00112643
7.96274	NA	0024+Heparin	0.00053744
7.97116	NA	24	0.00112254
7.97116	NA	0024+Heparin	0.000538269
7.97958	NA	24	0.00111806
7.97958	NA	0024+Heparin	0.000533755
7.988	NA	24	0.00111494
7.988	NA	0024+Heparin	0.000525639
7.99641	NA	24	0.00111324
7.99641	NA	0024+Heparin	0.000517636
8.00483	NA	24	0.00111229
8.00483	NA	0024+Heparin	0.000512632
8.01325	NA	24	0.00111223
8.01325	NA	0024+Heparin	0.000510933
8.02167	NA	24	0.0011141
[truncated: 5,221 more rows]

## Sheet: Panel C - legend
24	Gremlin-1
0024+Heparin	Gremlin-1+Heparin
