# Supplementary material for: Evaluation of Gremlin-1 as a therapeutic target in metabolic dysfunction-associated steatohepatitis
Source: eLife. 2024 Oct 3;13:RP95185. doi: 10.7554/eLife.95185 (PMC11449483; doi:10.7554/eLife.95185)
Supplement: Figure 3—figure supplement 1—source data 1. [file elife-95185-fig3-figsupp1-data1.xlsx]

## Sheet: data
volume_mL	mol_weight	condition	UV
14.8856	184.551	0030+0024	NA
14.9276	184.975	0030+0024	NA
14.9697	184.645	0030+0024	NA
15.0118	185.042	0030+0024	NA
15.0539	185.205	0030+0024	NA
15.096	185.512	0030+0024	NA
15.1381	185.537	0030+0024	NA
15.1802	185.304	0030+0024	NA
15.2223	185.227	0030+0024	NA
15.2643	184.745	0030+0024	NA
15.3064	184.534	0030+0024	NA
15.3485	183.884	0030+0024	NA
15.3906	183.503	0030+0024	NA
14.9276	190.35	0030+0024+Heparin	NA
14.9697	189.099	0030+0024+Heparin	NA
15.0118	188.242	0030+0024+Heparin	NA
15.0539	187.269	0030+0024+Heparin	NA
15.096	186.493	0030+0024+Heparin	NA
15.1381	186.041	0030+0024+Heparin	NA
15.1802	184.672	0030+0024+Heparin	NA
15.2223	183.386	0030+0024+Heparin	NA
15.2643	182.369	0030+0024+Heparin	NA
15.3064	181.171	0030+0024+Heparin	NA
15.3485	179.882	0030+0024+Heparin	NA
15.3906	178.565	0030+0024+Heparin	NA
15.7441	139.993	0030+Heparin	NA
15.7862	140.121	0030+Heparin	NA
15.8283	140.551	0030+Heparin	NA
15.8704	140.857	0030+Heparin	NA
15.9125	141.062	0030+Heparin	NA
15.9546	141.135	0030+Heparin	NA
15.9966	141.04	0030+Heparin	NA
16.0387	141.095	0030+Heparin	NA
16.0808	140.903	0030+Heparin	NA
16.1229	140.148	0030+Heparin	NA
16.165	139.538	0030+Heparin	NA
13.4294	390.046	0032+0024	NA
13.4715	388.138	0032+0024	NA
13.5136	384.447	0032+0024	NA
13.5556	383.167	0032+0024	NA
13.5977	381.197	0032+0024	NA
13.6398	379.351	0032+0024	NA
13.6819	377.858	0032+0024	NA
13.724	376.252	0032+0024	NA
13.7661	374.786	0032+0024	NA
13.8082	373.1	0032+0024	NA
13.8502	370.701	0032+0024	NA
13.8923	369.307	0032+0024	NA
13.9344	366.385	0032+0024	NA
13.9765	366.296	0032+0024	NA
14.0186	363.194	0032+0024	NA
15.7694	154.689	0032+0024+Heparin	NA
15.8115	153.344	0032+0024+Heparin	NA
15.8536	150.488	0032+0024+Heparin	NA
15.8956	151.33	0032+0024+Heparin	NA
15.9377	149.787	0032+0024+Heparin	NA
15.9798	149.75	0032+0024+Heparin	NA
16.0219	148.691	0032+0024+Heparin	NA
16.064	148.593	0032+0024+Heparin	NA
16.1061	148.495	0032+0024+Heparin	NA
16.1482	148.995	0032+0024+Heparin	NA
16.1902	147.959	0032+0024+Heparin	NA
16.2323	147.976	0032+0024+Heparin	NA
16.2744	146.566	0032+0024+Heparin	NA
15.8367	141.944	0032+Heparin	NA
15.8788	142.653	0032+Heparin	NA
15.9209	142.829	0032+Heparin	NA
15.963	143.377	0032+Heparin	NA
16.0051	143.2	0032+Heparin	NA
16.0472	143.402	0032+Heparin	NA
16.0892	143.125	0032+Heparin	NA
16.1313	143.215	0032+Heparin	NA
16.1734	142.545	0032+Heparin	NA
16.2155	142.65	0032+Heparin	NA
16.2576	141.761	0032+Heparin	NA
0	NA	0030+0024	0.000840897
0	NA	0030+0024+Heparin	0.00126944
0	NA	0030+Heparin	0.00151004
0	NA	0032+0024	0.00307067
0	NA	0032+0024+Heparin	0.00287877
0	NA	0032+Heparin	0.00160191
0.00841728	NA	0030+0024	0.000925247
0.00841728	NA	0030+0024+Heparin	0.00140516
0.00841728	NA	0030+Heparin	0.00166624
0.00841728	NA	0032+0024	0.00339401
0.00841728	NA	0032+0024+Heparin	0.00318232
0.00841728	NA	0032+Heparin	0.00177726
0.0168346	NA	0030+0024	0.00100038
0.0168346	NA	0030+0024+Heparin	0.00152331
0.0168346	NA	0030+Heparin	0.00180421
0.0168346	NA	0032+0024	0.00367779
0.0168346	NA	0032+0024+Heparin	0.00345375
0.0168346	NA	0032+Heparin	0.00192962
0.0252518	NA	0030+0024	0.00106879
0.0252518	NA	0030+0024+Heparin	0.00162581
0.0252518	NA	0030+Heparin	0.00192577
0.0252518	NA	0032+0024	0.00392886
0.0252518	NA	0032+0024+Heparin	0.0037011
0.0252518	NA	0032+Heparin	0.00206088
0.0336691	NA	0030+0024	0.00113155
0.0336691	NA	0030+0024+Heparin	0.00171428
0.0336691	NA	0030+Heparin	0.00203221
0.0336691	NA	0032+0024	0.00415323
0.0336691	NA	0032+0024+Heparin	0.0039274
0.0336691	NA	0032+Heparin	0.00217311
0.0420864	NA	0030+0024	0.00118869
0.0420864	NA	0030+0024+Heparin	0.00179023
0.0420864	NA	0030+Heparin	0.00212427
0.0420864	NA	0032+0024	0.00435394
0.0420864	NA	0032+0024+Heparin	0.00413332
0.0420864	NA	0032+Heparin	0.0022674
0.0505037	NA	0030+0024	0.00124017
0.0505037	NA	0030+0024+Heparin	0.00185533
0.0505037	NA	0030+Heparin	0.00220239
0.0505037	NA	0032+0024	0.00453176
0.0505037	NA	0032+0024+Heparin	0.00431962
0.0505037	NA	0032+Heparin	0.00234486
0.0589209	NA	0030+0024	0.00128594
0.0589209	NA	0030+0024+Heparin	0.00191128
0.0589209	NA	0030+Heparin	0.00226756
0.0589209	NA	0032+0024	0.00468734
0.0589209	NA	0032+0024+Heparin	0.00448749
0.0589209	NA	0032+Heparin	0.00240871
0.0673382	NA	0030+0024	0.00132531
0.0673382	NA	0030+0024+Heparin	0.00195989
0.0673382	NA	0030+Heparin	0.00232274
0.0673382	NA	0032+0024	0.00482201
0.0673382	NA	0032+0024+Heparin	0.0046387
0.0673382	NA	0032+Heparin	0.00246365
0.0757555	NA	0030+0024	0.00135667
0.0757555	NA	0030+0024+Heparin	0.00200301
0.0757555	NA	0030+Heparin	0.00237234
0.0757555	NA	0032+0024	0.004938
0.0757555	NA	0032+0024+Heparin	0.00477506
0.0757555	NA	0032+Heparin	0.00251355
0.0841728	NA	0030+0024	0.00137829
0.0841728	NA	0030+0024+Heparin	0.0020418
0.0841728	NA	0030+Heparin	0.00241946
0.0841728	NA	0032+0024	0.00503836
0.0841728	NA	0032+0024+Heparin	0.00489788
0.0841728	NA	0032+Heparin	0.00256018
0.09259	NA	0030+0024	0.00139032
0.09259	NA	0030+0024+Heparin	0.00207636
0.09259	NA	0030+Heparin	0.00246418
0.09259	NA	0032+0024	0.00512628
0.09259	NA	0032+0024+Heparin	0.00500852
0.09259	NA	0032+Heparin	0.00260332
0.101007	NA	0030+0024	0.0013962
0.101007	NA	0030+0024+Heparin	0.00210646
0.101007	NA	0030+Heparin	0.00250478
0.101007	NA	0032+0024	0.00520397
0.101007	NA	0032+0024+Heparin	0.00510898
0.101007	NA	0032+Heparin	0.00264196
0.109425	NA	0030+0024	0.00140089
0.109425	NA	0030+0024+Heparin	0.00213196
0.109425	NA	0030+Heparin	0.0025395
0.109425	NA	0032+0024	0.00527211
0.109425	NA	0032+0024+Heparin	0.00520089
0.109425	NA	0032+Heparin	0.00267498
0.117842	NA	0030+0024	0.0014074
0.117842	NA	0030+0024+Heparin	0.00215268
0.117842	NA	0030+Heparin	0.00256739
0.117842	NA	0032+0024	0.00533015
0.117842	NA	0032+0024+Heparin	0.00528478
0.117842	NA	0032+Heparin	0.00270087
0.126259	NA	0030+0024	0.00141582
0.126259	NA	0030+0024+Heparin	0.00216858
0.126259	NA	0030+Heparin	0.0025888
0.126259	NA	0032+0024	0.00537699
0.126259	NA	0032+0024+Heparin	0.00536146
0.126259	NA	0032+Heparin	0.00271848
0.134676	NA	0030+0024	0.00142478
0.134676	NA	0030+0024+Heparin	0.00218027
0.134676	NA	0030+Heparin	0.00260503
0.134676	NA	0032+0024	0.00541181
0.134676	NA	0032+0024+Heparin	0.0054334
0.134676	NA	0032+Heparin	0.00272917
0.143094	NA	0030+0024	0.00143296
0.143094	NA	0030+0024+Heparin	0.00218884
0.143094	NA	0030+Heparin	0.00261697
0.143094	NA	0032+0024	0.00543523
0.143094	NA	0032+0024+Heparin	0.00550327
0.143094	NA	0032+Heparin	0.00273711
0.151511	NA	0030+0024	0.00143979
0.151511	NA	0030+0024+Heparin	0.00219532
0.151511	NA	0030+Heparin	0.00262432
0.151511	NA	0032+0024	0.00545065
0.151511	NA	0032+0024+Heparin	0.00557177
0.151511	NA	0032+Heparin	0.00274599
0.159928	NA	0030+0024	0.00144569
0.159928	NA	0030+0024+Heparin	0.00220031
0.159928	NA	0030+Heparin	0.00262684
0.159928	NA	0032+0024	0.00546325
0.159928	NA	0032+0024+Heparin	0.00563834
0.159928	NA	0032+Heparin	0.00275646
0.168346	NA	0030+0024	0.00145149
0.168346	NA	0030+0024+Heparin	0.00220441
0.168346	NA	0030+Heparin	0.00262557
0.168346	NA	0032+0024	0.00547662
0.168346	NA	0032+0024+Heparin	0.00570327
0.168346	NA	0032+Heparin	0.00276763
0.176763	NA	0030+0024	0.00145746
0.176763	NA	0030+0024+Heparin	0.00220905
0.176763	NA	0030+Heparin	0.00262247
0.176763	NA	0032+0024	0.00549121
0.176763	NA	0032+0024+Heparin	0.00576729
0.176763	NA	0032+Heparin	0.00277893
0.18518	NA	0030+0024	0.00146333
0.18518	NA	0030+0024+Heparin	0.00221598
0.18518	NA	0030+Heparin	0.00262012
0.18518	NA	0032+0024	0.00550595
0.18518	NA	0032+0024+Heparin	0.00582992
0.18518	NA	0032+Heparin	0.00279004
0.193597	NA	0030+0024	0.00146882
0.193597	NA	0030+0024+Heparin	0.0022254
0.193597	NA	0030+Heparin	0.00262064
0.193597	NA	0032+0024	0.00551975
0.193597	NA	0032+0024+Heparin	0.00588996
0.193597	NA	0032+Heparin	0.00280054
0.202015	NA	0030+0024	0.00147385
0.202015	NA	0030+0024+Heparin	0.00223542
0.202015	NA	0030+Heparin	0.00262416
0.202015	NA	0032+0024	0.00553203
0.202015	NA	0032+0024+Heparin	0.00594716
0.202015	NA	0032+Heparin	0.00280988
0.210432	NA	0030+0024	0.00147833
0.210432	NA	0030+0024+Heparin	0.00224311
0.210432	NA	0030+Heparin	0.00262971
0.210432	NA	0032+0024	0.00554277
0.210432	NA	0032+0024+Heparin	0.00600257
0.210432	NA	0032+Heparin	0.00281753
0.218849	NA	0030+0024	0.0014822
0.218849	NA	0030+0024+Heparin	0.00224593
0.218849	NA	0030+Heparin	0.00263721
0.218849	NA	0032+0024	0.00555246
0.218849	NA	0032+0024+Heparin	0.00605712
0.218849	NA	0032+Heparin	0.00282291
0.227266	NA	0030+0024	0.00148548
0.227266	NA	0030+0024+Heparin	0.00224302
0.227266	NA	0030+Heparin	0.0026466
0.227266	NA	0032+0024	0.00556184
0.227266	NA	0032+0024+Heparin	0.00611024
0.227266	NA	0032+Heparin	0.00282531
0.235684	NA	0030+0024	0.00148836
0.235684	NA	0030+0024+Heparin	0.00223617
0.235684	NA	0030+Heparin	0.00265647
0.235684	NA	0032+0024	0.00557147
0.235684	NA	0032+0024+Heparin	0.00616032
0.235684	NA	0032+Heparin	0.00282392
0.244101	NA	0030+0024	0.00149135
0.244101	NA	0030+0024+Heparin	0.00222862
0.244101	NA	0030+Heparin	0.00266483
0.244101	NA	0032+0024	0.00558139
0.244101	NA	0032+0024+Heparin	0.00620622
0.244101	NA	0032+Heparin	0.00281821
0.252518	NA	0030+0024	0.00149499
0.252518	NA	0030+0024+Heparin	0.00222267
0.252518	NA	0030+Heparin	0.00267094
0.252518	NA	0032+0024	0.00559103
0.252518	NA	0032+0024+Heparin	0.00624791
0.252518	NA	0032+Heparin	0.00280842
0.260936	NA	0030+0024	0.00149946
0.260936	NA	0030+0024+Heparin	0.00221903
0.260936	NA	0030+Heparin	0.00267593
0.260936	NA	0032+0024	0.00559954
0.260936	NA	0032+0024+Heparin	0.00628653
0.260936	NA	0032+Heparin	0.00279582
0.269353	NA	0030+0024	0.00150496
0.269353	NA	0030+0024+Heparin	0.00221782
0.269353	NA	0030+Heparin	0.00268137
0.269353	NA	0032+0024	0.005606
0.269353	NA	0032+0024+Heparin	0.00632431
0.269353	NA	0032+Heparin	0.00278264
0.27777	NA	0030+0024	0.00151164
0.27777	NA	0030+0024+Heparin	0.00221919
0.27777	NA	0030+Heparin	0.00268752
0.27777	NA	0032+0024	0.00560949
0.27777	NA	0032+0024+Heparin	0.00636308
0.27777	NA	0032+Heparin	0.00277125
0.286187	NA	0030+0024	0.00151882
0.286187	NA	0030+0024+Heparin	0.00222278
0.286187	NA	0030+Heparin	0.00269404
0.286187	NA	0032+0024	0.00560929
0.286187	NA	0032+0024+Heparin	0.00640286
0.286187	NA	0032+Heparin	0.00276332
0.294605	NA	0030+0024	0.00152483
0.294605	NA	0030+0024+Heparin	0.0022273
0.294605	NA	0030+Heparin	0.00270168
0.294605	NA	0032+0024	0.00560544
0.294605	NA	0032+0024+Heparin	0.00644254
0.294605	NA	0032+Heparin	0.00275942
0.303022	NA	0030+0024	0.00152761
0.303022	NA	0030+0024+Heparin	0.00223145
0.303022	NA	0030+Heparin	0.00271161
0.303022	NA	0032+0024	0.00559866
0.303022	NA	0032+0024+Heparin	0.00648083
0.303022	NA	0032+Heparin	0.00275896
0.311439	NA	0030+0024	0.00152543
0.311439	NA	0030+0024+Heparin	0.00223518
0.311439	NA	0030+Heparin	0.00272356
0.311439	NA	0032+0024	0.00558946
0.311439	NA	0032+0024+Heparin	0.00651614
0.311439	NA	0032+Heparin	0.00276076
0.319857	NA	0030+0024	0.00151776
0.319857	NA	0030+0024+Heparin	0.00223995
0.319857	NA	0030+Heparin	0.00273558
0.319857	NA	0032+0024	0.00557817
0.319857	NA	0032+0024+Heparin	0.00654698
0.319857	NA	0032+Heparin	0.00276394
0.328274	NA	0030+0024	0.00150644
0.328274	NA	0030+0024+Heparin	0.00224734
0.328274	NA	0030+Heparin	0.00274574
0.328274	NA	0032+0024	0.00556557
0.328274	NA	0032+0024+Heparin	0.00657269
0.328274	NA	0032+Heparin	0.00276788
0.336691	NA	0030+0024	0.00149539
0.336691	NA	0030+0024+Heparin	0.00225739
0.336691	NA	0030+Heparin	0.0027536
0.336691	NA	0032+0024	0.00555253
0.336691	NA	0032+0024+Heparin	0.0065941
0.336691	NA	0032+Heparin	0.00277168
0.345108	NA	0030+0024	0.00148825
0.345108	NA	0030+0024+Heparin	0.00226891
0.345108	NA	0030+Heparin	0.0027599
0.345108	NA	0032+0024	0.0055389
0.345108	NA	0032+0024+Heparin	0.00661338
0.345108	NA	0032+Heparin	0.00277421
0.353526	NA	0030+0024	0.00148567
0.353526	NA	0030+0024+Heparin	0.00228027
0.353526	NA	0030+Heparin	0.00276553
0.353526	NA	0032+0024	0.00552387
0.353526	NA	0032+0024+Heparin	0.00663221
0.353526	NA	0032+Heparin	0.00277482
0.361943	NA	0030+0024	0.00148538
0.361943	NA	0030+0024+Heparin	0.00228944
0.361943	NA	0030+Heparin	0.00277128
0.361943	NA	0032+0024	0.0055076
0.361943	NA	0032+0024+Heparin	0.00665005
0.361943	NA	0032+Heparin	0.00277364
0.37036	NA	0030+0024	0.00148491
0.37036	NA	0030+0024+Heparin	0.00229425
0.37036	NA	0030+Heparin	0.00277763
0.37036	NA	0032+0024	0.00549221
0.37036	NA	0032+0024+Heparin	0.00666429
0.37036	NA	0032+Heparin	0.0027714
0.378777	NA	0030+0024	0.00148341
0.378777	NA	0030+0024+Heparin	0.00229341
0.378777	NA	0030+Heparin	0.00278409
0.378777	NA	0032+0024	0.00548074
0.378777	NA	0032+0024+Heparin	0.00667183
0.378777	NA	0032+Heparin	0.0027686
0.387195	NA	0030+0024	0.00148147
0.387195	NA	0030+0024+Heparin	0.00228783
0.387195	NA	0030+Heparin	0.00278935
0.387195	NA	0032+0024	0.0054746
0.387195	NA	0032+0024+Heparin	0.00667141
0.387195	NA	0032+Heparin	0.0027651
0.395612	NA	0030+0024	0.00148016
0.395612	NA	0030+0024+Heparin	0.00228036
0.395612	NA	0030+Heparin	0.00279198
0.395612	NA	0032+0024	0.00547226
0.395612	NA	0032+0024+Heparin	0.0066654
0.395612	NA	0032+Heparin	0.00276062
0.404029	NA	0030+0024	0.00148002
0.404029	NA	0030+0024+Heparin	0.00227357
0.404029	NA	0030+Heparin	0.00279152
0.404029	NA	0032+0024	0.00547104
0.404029	NA	0032+0024+Heparin	0.00665829
0.404029	NA	0032+Heparin	0.00275539
0.412447	NA	0030+0024	0.00148078
0.412447	NA	0030+0024+Heparin	0.00226863
0.412447	NA	0030+Heparin	0.00278984
0.412447	NA	0032+0024	0.0054695
0.412447	NA	0032+0024+Heparin	0.00665271
0.412447	NA	0032+Heparin	0.00275014
0.420864	NA	0030+0024	0.00148135
0.420864	NA	0030+0024+Heparin	0.00226551
0.420864	NA	0030+Heparin	0.00279003
0.420864	NA	0032+0024	0.00546759
0.420864	NA	0032+0024+Heparin	0.00664841
0.420864	NA	0032+Heparin	0.00274538
0.429281	NA	0030+0024	0.00148027
0.429281	NA	0030+0024+Heparin	0.00226316
0.429281	NA	0030+Heparin	0.0027931
0.429281	NA	0032+0024	0.00546583
0.429281	NA	0032+0024+Heparin	0.00664392
0.429281	NA	0032+Heparin	0.00274178
0.437698	NA	0030+0024	0.00147663
0.437698	NA	0030+0024+Heparin	0.0022602
0.437698	NA	0030+Heparin	0.00279717
0.437698	NA	0032+0024	0.00546456
0.437698	NA	0032+0024+Heparin	0.00663775
0.437698	NA	0032+Heparin	0.00274099
0.446116	NA	0030+0024	0.00147125
0.446116	NA	0030+0024+Heparin	0.00225598
0.446116	NA	0030+Heparin	0.00279997
0.446116	NA	0032+0024	0.00546369
0.446116	NA	0032+0024+Heparin	0.00662877
0.446116	NA	0032+Heparin	0.00274445
0.454533	NA	0030+0024	0.00146612
0.454533	NA	0030+0024+Heparin	0.00225115
0.454533	NA	0030+Heparin	0.00280059
0.454533	NA	0032+0024	0.00546252
0.454533	NA	0032+0024+Heparin	0.0066164
0.454533	NA	0032+Heparin	0.00275132
0.46295	NA	0030+0024	0.00146233
0.46295	NA	0030+0024+Heparin	0.00224706
0.46295	NA	0030+Heparin	0.00279897
0.46295	NA	0032+0024	0.0054597
0.46295	NA	0032+0024+Heparin	0.00660013
0.46295	NA	0032+Heparin	0.00275912
0.471368	NA	0030+0024	0.00145984
0.471368	NA	0030+0024+Heparin	0.00224478
0.471368	NA	0030+Heparin	0.00279553
0.471368	NA	0032+0024	0.00545481
0.471368	NA	0032+0024+Heparin	0.00658036
0.471368	NA	0032+Heparin	0.00276616
0.479785	NA	0030+0024	0.00145797
0.479785	NA	0030+0024+Heparin	0.00224403
0.479785	NA	0030+Heparin	0.00279087
0.479785	NA	0032+0024	0.00544809
0.479785	NA	0032+0024+Heparin	0.00655808
0.479785	NA	0032+Heparin	0.00277172
0.488202	NA	0030+0024	0.00145613
0.488202	NA	0030+0024+Heparin	0.00224393
0.488202	NA	0030+Heparin	0.00278622
0.488202	NA	0032+0024	0.00544075
0.488202	NA	0032+0024+Heparin	0.00653507
0.488202	NA	0032+Heparin	0.00277641
0.496619	NA	0030+0024	0.00145416
0.496619	NA	0030+0024+Heparin	0.00224346
0.496619	NA	0030+Heparin	0.00278253
0.496619	NA	0032+0024	0.00543356
0.496619	NA	0032+0024+Heparin	0.00651231
0.496619	NA	0032+Heparin	0.00278165
0.505037	NA	0030+0024	0.00145259
0.505037	NA	0030+0024+Heparin	0.00224124
0.505037	NA	0030+Heparin	0.00277941
0.505037	NA	0032+0024	0.00542591
0.505037	NA	0032+0024+Heparin	0.00648955
0.505037	NA	0032+Heparin	0.002788
0.513454	NA	0030+0024	0.00145237
0.513454	NA	0030+0024+Heparin	0.00223576
0.513454	NA	0030+Heparin	0.00277545
0.513454	NA	0032+0024	0.00541667
0.513454	NA	0032+0024+Heparin	0.00646634
0.513454	NA	0032+Heparin	0.00279461
0.521871	NA	0030+0024	0.00145404
0.521871	NA	0030+0024+Heparin	0.00222714
0.521871	NA	0030+Heparin	0.00276989
0.521871	NA	0032+0024	0.00540571
0.521871	NA	0032+0024+Heparin	0.00644233
0.521871	NA	0032+Heparin	0.00280059
0.530288	NA	0030+0024	0.00145721
0.530288	NA	0030+0024+Heparin	0.00221818
0.530288	NA	0030+Heparin	0.00276405
0.530288	NA	0032+0024	0.00539456
0.530288	NA	0032+0024+Heparin	0.00641659
0.530288	NA	0032+Heparin	0.00280629
0.538706	NA	0030+0024	0.00146099
0.538706	NA	0030+0024+Heparin	0.00221243
0.538706	NA	0030+Heparin	0.00275995
0.538706	NA	0032+0024	0.00538533
0.538706	NA	0032+0024+Heparin	0.00638779
0.538706	NA	0032+Heparin	0.00281261
0.547123	NA	0030+0024	0.00146432
0.547123	NA	0030+0024+Heparin	0.00221195
0.547123	NA	0030+Heparin	0.0027576
0.547123	NA	0032+0024	0.00537955
0.547123	NA	0032+0024+Heparin	0.00635572
0.547123	NA	0032+Heparin	0.00281949
0.55554	NA	0030+0024	0.00146611
0.55554	NA	0030+0024+Heparin	0.00221656
0.55554	NA	0030+Heparin	0.00275566
0.55554	NA	0032+0024	0.00537805
0.55554	NA	0032+0024+Heparin	0.00632172
0.55554	NA	0032+Heparin	0.00282557
0.563958	NA	0030+0024	0.00146559
0.563958	NA	0030+0024+Heparin	0.00222407
0.563958	NA	0030+Heparin	0.00275382
0.563958	NA	0032+0024	0.0053806
0.563958	NA	0032+0024+Heparin	0.00628737
0.563958	NA	0032+Heparin	0.00282916
0.572375	NA	0030+0024	0.00146327
0.572375	NA	0030+0024+Heparin	0.00223171
0.572375	NA	0030+Heparin	0.00275311
0.572375	NA	0032+0024	0.00538527
0.572375	NA	0032+0024+Heparin	0.00625369
0.572375	NA	0032+Heparin	0.00282905
0.580792	NA	0030+0024	0.00146066
0.580792	NA	0030+0024+Heparin	0.00223739
0.580792	NA	0030+Heparin	0.00275424
0.580792	NA	0032+0024	0.00538945
0.580792	NA	0032+0024+Heparin	0.00622092
0.580792	NA	0032+Heparin	0.00282462
0.589209	NA	0030+0024	0.00145842
0.589209	NA	0030+0024+Heparin	0.0022399
0.589209	NA	0030+Heparin	0.00275664
0.589209	NA	0032+0024	0.00539105
0.589209	NA	0032+0024+Heparin	0.00618785
0.589209	NA	0032+Heparin	0.00281579
0.597627	NA	0030+0024	0.00145578
0.597627	NA	0030+0024+Heparin	0.00223884
0.597627	NA	0030+Heparin	0.00275902
0.597627	NA	0032+0024	0.00538869
0.597627	NA	0032+0024+Heparin	0.00615219
0.597627	NA	0032+Heparin	0.0028044
0.606044	NA	0030+0024	0.00145209
0.606044	NA	0030+0024+Heparin	0.00223437
0.606044	NA	0030+Heparin	0.00276009
0.606044	NA	0032+0024	0.00538184
0.606044	NA	0032+0024+Heparin	0.00611278
0.606044	NA	0032+Heparin	0.0027947
0.614461	NA	0030+0024	0.00144754
0.614461	NA	0030+0024+Heparin	0.00222703
0.614461	NA	0030+Heparin	0.00275885
0.614461	NA	0032+0024	0.00537187
0.614461	NA	0032+0024+Heparin	0.00607105
0.614461	NA	0032+Heparin	0.00279068
0.622879	NA	0030+0024	0.00144276
0.622879	NA	0030+0024+Heparin	0.00221786
0.622879	NA	0030+Heparin	0.00275563
0.622879	NA	0032+0024	0.0053617
0.622879	NA	0032+0024+Heparin	0.00602901
0.622879	NA	0032+Heparin	0.00279325
0.631296	NA	0030+0024	0.00143876
0.631296	NA	0030+0024+Heparin	0.00220815
0.631296	NA	0030+Heparin	0.0027523
0.631296	NA	0032+0024	0.00535367
0.631296	NA	0032+0024+Heparin	0.00598707
0.631296	NA	0032+Heparin	0.00280049
0.639713	NA	0030+0024	0.00143707
0.639713	NA	0030+0024+Heparin	0.00219878
0.639713	NA	0030+Heparin	0.0027505
0.639713	NA	0032+0024	0.00534859
0.639713	NA	0032+0024+Heparin	0.00594401
0.639713	NA	0032+Heparin	0.00280963
0.64813	NA	0030+0024	0.00143888
0.64813	NA	0030+0024+Heparin	0.00218965
0.64813	NA	0030+Heparin	0.00274998
0.64813	NA	0032+0024	0.00534628
0.64813	NA	0032+0024+Heparin	0.00589776
0.64813	NA	0032+Heparin	0.00281852
0.656548	NA	0030+0024	0.00144441
0.656548	NA	0030+0024+Heparin	0.00217993
0.656548	NA	0030+Heparin	0.00274949
0.656548	NA	0032+0024	0.00534599
0.656548	NA	0032+0024+Heparin	0.00584796
0.656548	NA	0032+Heparin	0.0028258
0.664965	NA	0030+0024	0.00145295
0.664965	NA	0030+0024+Heparin	0.00216851
0.664965	NA	0030+Heparin	0.00274804
0.664965	NA	0032+0024	0.00534662
0.664965	NA	0032+0024+Heparin	0.00579812
0.664965	NA	0032+Heparin	0.0028307
0.673382	NA	0030+0024	0.00146263
0.673382	NA	0030+0024+Heparin	0.0021552
0.673382	NA	0030+Heparin	0.00274519
0.673382	NA	0032+0024	0.00534692
0.673382	NA	0032+0024+Heparin	0.00575297
0.673382	NA	0032+Heparin	0.00283282
0.681799	NA	0030+0024	0.00147057
0.681799	NA	0030+0024+Heparin	0.00214186
0.681799	NA	0030+Heparin	0.00274091
0.681799	NA	0032+0024	0.00534577
0.681799	NA	0032+0024+Heparin	0.00571417
0.681799	NA	0032+Heparin	0.00283208
0.690217	NA	0030+0024	0.00147429
0.690217	NA	0030+0024+Heparin	0.00213171
0.690217	NA	0030+Heparin	0.00273554
0.690217	NA	0032+0024	0.00534248
0.690217	NA	0032+0024+Heparin	0.00568027
0.690217	NA	0032+Heparin	0.00282828
0.698634	NA	0030+0024	0.00147332
0.698634	NA	0030+0024+Heparin	0.00212673
0.698634	NA	0030+Heparin	0.00272981
0.698634	NA	0032+0024	0.00533681
0.698634	NA	0032+0024+Heparin	0.0056485
0.698634	NA	0032+Heparin	0.00282083
0.707051	NA	0030+0024	0.00146948
0.707051	NA	0030+0024+Heparin	0.00212567
0.707051	NA	0030+Heparin	0.00272495
0.707051	NA	0032+0024	0.00532884
0.707051	NA	0032+0024+Heparin	0.00561506
0.707051	NA	0032+Heparin	0.00280983
0.715469	NA	0030+0024	0.00146563
0.715469	NA	0030+0024+Heparin	0.00212483
0.715469	NA	0030+Heparin	0.00272183
0.715469	NA	0032+0024	0.00531878
0.715469	NA	0032+0024+Heparin	0.0055759
0.715469	NA	0032+Heparin	0.00279753
0.723886	NA	0030+0024	0.00146389
0.723886	NA	0030+0024+Heparin	0.00212136
0.723886	NA	0030+Heparin	0.00271993
0.723886	NA	0032+0024	0.00530716
0.723886	NA	0032+0024+Heparin	0.0055292
0.723886	NA	0032+Heparin	0.00278704
0.732303	NA	0030+0024	0.00146527
0.732303	NA	0030+0024+Heparin	0.00211585
0.732303	NA	0030+Heparin	0.00271786
0.732303	NA	0032+0024	0.00529487
0.732303	NA	0032+0024+Heparin	0.00547733
0.732303	NA	0032+Heparin	0.00277988
0.74072	NA	0030+0024	0.00146942
0.74072	NA	0030+0024+Heparin	0.00211163
0.74072	NA	0030+Heparin	0.00271448
0.74072	NA	0032+0024	0.00528332
0.74072	NA	0032+0024+Heparin	0.0054258
0.74072	NA	0032+Heparin	0.00277555
0.749138	NA	0030+0024	0.0014744
0.749138	NA	0030+0024+Heparin	0.00211122
0.749138	NA	0030+Heparin	0.00270895
0.749138	NA	0032+0024	0.00527501
0.749138	NA	0032+0024+Heparin	0.00537992
0.749138	NA	0032+Heparin	0.00277234
0.757555	NA	0030+0024	0.00147796
0.757555	NA	0030+0024+Heparin	0.00211466
0.757555	NA	0030+Heparin	0.00270097
0.757555	NA	0032+0024	0.00527297
0.757555	NA	0032+0024+Heparin	0.00534154
0.757555	NA	0032+Heparin	0.00276802
0.765972	NA	0030+0024	0.00147899
0.765972	NA	0030+0024+Heparin	0.00212064
0.765972	NA	0030+Heparin	0.00269155
0.765972	NA	0032+0024	0.00527817
0.765972	NA	0032+0024+Heparin	0.005309
0.765972	NA	0032+Heparin	0.00276056
0.774389	NA	0030+0024	0.00147757
0.774389	NA	0030+0024+Heparin	0.00212766
0.774389	NA	0030+Heparin	0.00268277
0.774389	NA	0032+0024	0.00528785
0.774389	NA	0032+0024+Heparin	0.00527948
0.774389	NA	0032+Heparin	0.00274889
0.782807	NA	0030+0024	0.00147456
0.782807	NA	0030+0024+Heparin	0.00213437
0.782807	NA	0030+Heparin	0.00267669
0.782807	NA	0032+0024	0.00529763
0.782807	NA	0032+0024+Heparin	0.00525101
0.782807	NA	0032+Heparin	0.00273344
0.791224	NA	0030+0024	0.00147139
0.791224	NA	0030+0024+Heparin	0.00213981
0.791224	NA	0030+Heparin	0.00267473
0.791224	NA	0032+0024	0.00530442
0.791224	NA	0032+0024+Heparin	0.00522305
0.791224	NA	0032+Heparin	0.00271582
0.799641	NA	0030+0024	0.00146895
0.799641	NA	0030+0024+Heparin	0.00214368
0.799641	NA	0030+Heparin	0.0026773
0.799641	NA	0032+0024	0.00530723
0.799641	NA	0032+0024+Heparin	0.0051961
0.799641	NA	0032+Heparin	0.00269772
0.808059	NA	0030+0024	0.00146663
0.808059	NA	0030+0024+Heparin	0.002146
0.808059	NA	0030+Heparin	0.00268355
0.808059	NA	0032+0024	0.0053068
0.808059	NA	0032+0024+Heparin	0.00517034
0.808059	NA	0032+Heparin	0.00268081
0.816476	NA	0030+0024	0.00146314
0.816476	NA	0030+0024+Heparin	0.00214691
0.816476	NA	0030+Heparin	0.00269204
0.816476	NA	0032+0024	0.00530464
0.816476	NA	0032+0024+Heparin	0.0051445
0.816476	NA	0032+Heparin	0.00266693
0.824893	NA	0030+0024	0.00145796
0.824893	NA	0030+0024+Heparin	0.00214681
0.824893	NA	0030+Heparin	0.00270135
0.824893	NA	0032+0024	0.00530172
0.824893	NA	0032+0024+Heparin	0.00511606
0.824893	NA	0032+Heparin	0.0026572
0.83331	NA	0030+0024	0.00145167
0.83331	NA	0030+0024+Heparin	0.00214645
0.83331	NA	0030+Heparin	0.00271008
0.83331	NA	0032+0024	0.00529786
0.83331	NA	0032+0024+Heparin	0.00508345
0.83331	NA	0032+Heparin	0.00265166
0.841728	NA	0030+0024	0.00144567
0.841728	NA	0030+0024+Heparin	0.00214642
0.841728	NA	0030+Heparin	0.00271724
0.841728	NA	0032+0024	0.00529199
0.841728	NA	0032+0024+Heparin	0.00504844
0.841728	NA	0032+Heparin	0.00264958
0.850145	NA	0030+0024	0.00144151
0.850145	NA	0030+0024+Heparin	0.00214675
0.850145	NA	0030+Heparin	0.00272268
0.850145	NA	0032+0024	0.00528322
0.850145	NA	0032+0024+Heparin	0.00501481
0.850145	NA	0032+Heparin	0.00264943
0.858562	NA	0030+0024	0.00143969
0.858562	NA	0030+0024+Heparin	0.00214718
0.858562	NA	0030+Heparin	0.00272688
0.858562	NA	0032+0024	0.00527167
0.858562	NA	0032+0024+Heparin	0.00498507
0.858562	NA	0032+Heparin	0.00264893
0.86698	NA	0030+0024	0.00143896
0.86698	NA	0030+0024+Heparin	0.00214711
0.86698	NA	0030+Heparin	0.00272977
0.86698	NA	0032+0024	0.00525847
0.86698	NA	0032+0024+Heparin	0.00495939
0.86698	NA	0032+Heparin	0.00264617
0.875397	NA	0030+0024	0.00143747
0.875397	NA	0030+0024+Heparin	0.00214507
0.875397	NA	0030+Heparin	0.00273062
0.875397	NA	0032+0024	0.00524541
0.875397	NA	0032+0024+Heparin	0.00493643
0.875397	NA	0032+Heparin	0.00264114
0.883814	NA	0030+0024	0.00143419
0.883814	NA	0030+0024+Heparin	0.0021389
0.883814	NA	0030+Heparin	0.00272896
0.883814	NA	0032+0024	0.00523437
0.883814	NA	0032+0024+Heparin	0.00491388
0.883814	NA	0032+Heparin	0.00263608
0.892231	NA	0030+0024	0.00142931
0.892231	NA	0030+0024+Heparin	0.00212849
0.892231	NA	0030+Heparin	0.00272491
0.892231	NA	0032+0024	0.00522647
0.892231	NA	0032+0024+Heparin	0.00488878
0.892231	NA	0032+Heparin	0.00263357
0.900649	NA	0030+0024	0.00142362
0.900649	NA	0030+0024+Heparin	0.0021176
0.900649	NA	0030+Heparin	0.00271916
0.900649	NA	0032+0024	0.0052222
0.900649	NA	0032+0024+Heparin	0.00485931
0.900649	NA	0032+Heparin	0.00263456
0.909066	NA	0030+0024	0.00141803
0.909066	NA	0030+0024+Heparin	0.0021104
0.909066	NA	0030+Heparin	0.0027132
0.909066	NA	0032+0024	0.00522145
0.909066	NA	0032+0024+Heparin	0.00482693
0.909066	NA	0032+Heparin	0.00263878
0.917483	NA	0030+0024	0.00141328
0.917483	NA	0030+0024+Heparin	0.00210779
0.917483	NA	0030+Heparin	0.00270891
0.917483	NA	0032+0024	0.00522221
0.917483	NA	0032+0024+Heparin	0.00479534
0.917483	NA	0032+Heparin	0.00264552
0.9259	NA	0030+0024	0.00140975
0.9259	NA	0030+0024+Heparin	0.00210801
0.9259	NA	0030+Heparin	0.00270715
0.9259	NA	0032+0024	0.00522043
0.9259	NA	0032+0024+Heparin	0.00476699
0.9259	NA	0032+Heparin	0.00265346
0.934318	NA	0030+0024	0.00140727
0.934318	NA	0030+0024+Heparin	0.00210878
0.934318	NA	0030+Heparin	0.00270739
0.934318	NA	0032+0024	0.00521248
0.934318	NA	0032+0024+Heparin	0.00474158
0.934318	NA	0032+Heparin	0.00266113
0.942735	NA	0030+0024	0.00140518
0.942735	NA	0030+0024+Heparin	0.0021081
0.942735	NA	0030+Heparin	0.00270822
0.942735	NA	0032+0024	0.00519791
0.942735	NA	0032+0024+Heparin	0.00471702
0.942735	NA	0032+Heparin	0.00266747
0.951152	NA	0030+0024	0.00140266
0.951152	NA	0030+0024+Heparin	0.00210426
0.951152	NA	0030+Heparin	0.00270795
0.951152	NA	0032+0024	0.00517998
0.951152	NA	0032+0024+Heparin	0.00469139
0.951152	NA	0032+Heparin	0.0026717
0.95957	NA	0030+0024	0.00139898
0.95957	NA	0030+0024+Heparin	0.00209593
0.95957	NA	0030+Heparin	0.00270508
0.95957	NA	0032+0024	0.00516358
0.95957	NA	0032+0024+Heparin	0.00466475
0.95957	NA	0032+Heparin	0.00267306
0.967987	NA	0030+0024	0.001394
0.967987	NA	0030+0024+Heparin	0.00208299
0.967987	NA	0030+Heparin	0.00269915
0.967987	NA	0032+0024	0.00515239
0.967987	NA	0032+0024+Heparin	0.00463958
0.967987	NA	0032+Heparin	0.00267133
0.976404	NA	0030+0024	0.00138816
0.976404	NA	0030+0024+Heparin	0.00206664
0.976404	NA	0030+Heparin	0.00269197
0.976404	NA	0032+0024	0.00514749
0.976404	NA	0032+0024+Heparin	0.004618
0.976404	NA	0032+Heparin	0.0026676
0.984821	NA	0030+0024	0.00138189
0.984821	NA	0030+0024+Heparin	0.00204812
0.984821	NA	0030+Heparin	0.002687
0.984821	NA	0032+0024	0.00514756
0.984821	NA	0032+0024+Heparin	0.00459947
0.984821	NA	0032+Heparin	0.00266369
0.993239	NA	0030+0024	0.00137561
0.993239	NA	0030+0024+Heparin	0.00202828
0.993239	NA	0030+Heparin	0.0026864
0.993239	NA	0032+0024	0.00515008
0.993239	NA	0032+0024+Heparin	0.00458135
0.993239	NA	0032+Heparin	0.00266053
1.00166	NA	0030+0024	0.0013697
1.00166	NA	0030+0024+Heparin	0.00200884
1.00166	NA	0030+Heparin	0.00268972
1.00166	NA	0032+0024	0.00515286
1.00166	NA	0032+0024+Heparin	0.0045606
1.00166	NA	0032+Heparin	0.00265791
1.01007	NA	0030+0024	0.00136404
1.01007	NA	0030+0024+Heparin	0.0019931
1.01007	NA	0030+Heparin	0.00269536
1.01007	NA	0032+0024	0.00515448
1.01007	NA	0032+0024+Heparin	0.00453542
1.01007	NA	0032+Heparin	0.00265561
1.01849	NA	0030+0024	0.00135792
1.01849	NA	0030+0024+Heparin	0.00198337
1.01849	NA	0030+Heparin	0.00270213
1.01849	NA	0032+0024	0.0051539
1.01849	NA	0032+0024+Heparin	0.00450684
1.01849	NA	0032+Heparin	0.00265426
1.02691	NA	0030+0024	0.00135084
1.02691	NA	0030+0024+Heparin	0.00197861
1.02691	NA	0030+Heparin	0.00270936
1.02691	NA	0032+0024	0.00515044
1.02691	NA	0032+0024+Heparin	0.00447799
1.02691	NA	0032+Heparin	0.00265476
1.03533	NA	0030+0024	0.00134318
1.03533	NA	0030+0024+Heparin	0.00197577
1.03533	NA	0030+Heparin	0.00271641
1.03533	NA	0032+0024	0.00514414
1.03533	NA	0032+0024+Heparin	0.00445144
1.03533	NA	0032+Heparin	0.00265707
1.04374	NA	0030+0024	0.00133625
1.04374	NA	0030+0024+Heparin	0.00197263
1.04374	NA	0030+Heparin	0.00272226
1.04374	NA	0032+0024	0.0051351
1.04374	NA	0032+0024+Heparin	0.00442787
1.04374	NA	0032+Heparin	0.00266034
1.05216	NA	0030+0024	0.00133111
1.05216	NA	0030+0024+Heparin	0.00196865
1.05216	NA	0030+Heparin	0.00272555
1.05216	NA	0032+0024	0.00512313
1.05216	NA	0032+0024+Heparin	0.00440707
1.05216	NA	0032+Heparin	0.00266363
1.06058	NA	0030+0024	0.00132685
1.06058	NA	0030+0024+Heparin	0.00196417
1.06058	NA	0030+Heparin	0.00272518
1.06058	NA	0032+0024	0.00510931
1.06058	NA	0032+0024+Heparin	0.00438874
1.06058	NA	0032+Heparin	0.00266617
1.06899	NA	0030+0024	0.00132097
1.06899	NA	0030+0024+Heparin	0.00195922
1.06899	NA	0030+Heparin	0.00272158
1.06899	NA	0032+0024	0.00509634
1.06899	NA	0032+0024+Heparin	0.00437255
1.06899	NA	0032+Heparin	0.00266692
1.07741	NA	0030+0024	0.00131143
1.07741	NA	0030+0024+Heparin	0.00195354
1.07741	NA	0030+Heparin	0.00271676
1.07741	NA	0032+0024	0.0050856
1.07741	NA	0032+0024+Heparin	0.00435815
1.07741	NA	0032+Heparin	0.00266446
1.08583	NA	0030+0024	0.00129836
1.08583	NA	0030+0024+Heparin	0.00194744
1.08583	NA	0030+Heparin	0.00271236
1.08583	NA	0032+0024	0.00507588
1.08583	NA	0032+0024+Heparin	0.0043451
1.08583	NA	0032+Heparin	0.00265831
1.09425	NA	0030+0024	0.00128439
1.09425	NA	0030+0024+Heparin	0.00194169
1.09425	NA	0030+Heparin	0.00270877
1.09425	NA	0032+0024	0.00506514
1.09425	NA	0032+0024+Heparin	0.00433298
1.09425	NA	0032+Heparin	0.0026504
1.10266	NA	0030+0024	0.00127324
1.10266	NA	0030+0024+Heparin	0.00193636
1.10266	NA	0030+Heparin	0.0027058
1.10266	NA	0032+0024	0.00505183
1.10266	NA	0032+0024+Heparin	0.00432135
1.10266	NA	0032+Heparin	0.00264375
1.11108	NA	0030+0024	0.00126763
1.11108	NA	0030+0024+Heparin	0.00193081
1.11108	NA	0030+Heparin	0.00270306
1.11108	NA	0032+0024	0.00503582
1.11108	NA	0032+0024+Heparin	0.00430988
1.11108	NA	0032+Heparin	0.00263949
1.1195	NA	0030+0024	0.00126819
1.1195	NA	0030+0024+Heparin	0.00192458
1.1195	NA	0030+Heparin	0.00269987
1.1195	NA	0032+0024	0.00501897
1.1195	NA	0032+0024+Heparin	0.00429834
1.1195	NA	0032+Heparin	0.00263644
1.12792	NA	0030+0024	0.00127346
1.12792	NA	0030+0024+Heparin	0.0019176
1.12792	NA	0030+Heparin	0.00269583
1.12792	NA	0032+0024	0.00500392
1.12792	NA	0032+0024+Heparin	0.00428687
1.12792	NA	0032+Heparin	0.00263298
1.13633	NA	0030+0024	0.00128114
1.13633	NA	0030+0024+Heparin	0.00190983
1.13633	NA	0030+Heparin	0.00269157
1.13633	NA	0032+0024	0.00499163
1.13633	NA	0032+0024+Heparin	0.00427581
1.13633	NA	0032+Heparin	0.00262819
1.14475	NA	0030+0024	0.00128955
1.14475	NA	0030+0024+Heparin	0.00190102
1.14475	NA	0030+Heparin	0.00268834
1.14475	NA	0032+0024	0.00498131
1.14475	NA	0032+0024+Heparin	0.00426528
1.14475	NA	0032+Heparin	0.00262193
1.15317	NA	0030+0024	0.00129791
1.15317	NA	0030+0024+Heparin	0.00189106
1.15317	NA	0030+Heparin	0.00268642
1.15317	NA	0032+0024	0.00497246
1.15317	NA	0032+0024+Heparin	0.0042555
1.15317	NA	0032+Heparin	0.00261495
1.16158	NA	0030+0024	0.00130567
1.16158	NA	0030+0024+Heparin	0.00188017
1.16158	NA	0030+Heparin	0.00268439
1.16158	NA	0032+0024	0.00496539
1.16158	NA	0032+0024+Heparin	0.00424742
1.16158	NA	0032+Heparin	0.00260882
1.17	NA	0030+0024	0.00131194
1.17	NA	0030+0024+Heparin	0.00186835
1.17	NA	0030+Heparin	0.00268
1.17	NA	0032+0024	0.00496047
1.17	NA	0032+0024+Heparin	0.00424181
1.17	NA	0032+Heparin	0.00260453
1.17842	NA	0030+0024	0.001316
1.17842	NA	0030+0024+Heparin	0.00185551
1.17842	NA	0030+Heparin	0.0026721
1.17842	NA	0032+0024	0.0049576
1.17842	NA	0032+0024+Heparin	0.00423821
1.17842	NA	0032+Heparin	0.0026016
1.18684	NA	0030+0024	0.00131792
1.18684	NA	0030+0024+Heparin	0.00184254
1.18684	NA	0030+Heparin	0.00266196
1.18684	NA	0032+0024	0.00495617
1.18684	NA	0032+0024+Heparin	0.00423596
1.18684	NA	0032+Heparin	0.0025988
1.19525	NA	0030+0024	0.0013185
1.19525	NA	0030+0024+Heparin	0.00183098
1.19525	NA	0030+Heparin	0.00265208
1.19525	NA	0032+0024	0.0049552
1.19525	NA	0032+0024+Heparin	0.00423549
1.19525	NA	0032+Heparin	0.00259513
1.20367	NA	0030+0024	0.00131845
1.20367	NA	0030+0024+Heparin	0.00182145
1.20367	NA	0030+Heparin	0.00264353
1.20367	NA	0032+0024	0.00495361
1.20367	NA	0032+0024+Heparin	0.00423692
1.20367	NA	0032+Heparin	0.00259023
1.21209	NA	0030+0024	0.00131782
1.21209	NA	0030+0024+Heparin	0.00181341
1.21209	NA	0030+Heparin	0.00263525
1.21209	NA	0032+0024	0.00495052
1.21209	NA	0032+0024+Heparin	0.00423826
1.21209	NA	0032+Heparin	0.00258427
1.22051	NA	0030+0024	0.00131663
1.22051	NA	0030+0024+Heparin	0.00180624
1.22051	NA	0030+Heparin	0.0026257
1.22051	NA	0032+0024	0.00494532
1.22051	NA	0032+0024+Heparin	0.0042365
1.22051	NA	0032+Heparin	0.00257741
1.22892	NA	0030+0024	0.00131585
1.22892	NA	0030+0024+Heparin	0.00180011
1.22892	NA	0030+Heparin	0.00261434
1.22892	NA	0032+0024	0.00493799
1.22892	NA	0032+0024+Heparin	0.00422996
1.22892	NA	0032+Heparin	0.0025694
1.23734	NA	0030+0024	0.00131675
1.23734	NA	0030+0024+Heparin	0.00179648
1.23734	NA	0030+Heparin	0.00260165
1.23734	NA	0032+0024	0.0049295
1.23734	NA	0032+0024+Heparin	0.00421931
1.23734	NA	0032+Heparin	0.00255987
1.24576	NA	0030+0024	0.00131932
1.24576	NA	0030+0024+Heparin	0.00179723
1.24576	NA	0030+Heparin	0.002589
1.24576	NA	0032+0024	0.00492166
1.24576	NA	0032+0024+Heparin	0.00420637
1.24576	NA	0032+Heparin	0.00254872
1.25417	NA	0030+0024	0.0013227
1.25417	NA	0030+0024+Heparin	0.00180257
1.25417	NA	0030+Heparin	0.0025788
1.25417	NA	0032+0024	0.00491602
1.25417	NA	0032+0024+Heparin	0.00419191
1.25417	NA	0032+Heparin	0.00253688
1.26259	NA	0030+0024	0.00132646
1.26259	NA	0030+0024+Heparin	0.00181059
1.26259	NA	0030+Heparin	0.00257367
1.26259	NA	0032+0024	0.0049131
1.26259	NA	0032+0024+Heparin	0.00417606
1.26259	NA	0032+Heparin	0.00252666
1.27101	NA	0030+0024	0.00133054
1.27101	NA	0030+0024+Heparin	0.00181909
1.27101	NA	0030+Heparin	0.00257399
1.27101	NA	0032+0024	0.00491293
1.27101	NA	0032+0024+Heparin	0.00416052
1.27101	NA	0032+Heparin	0.0025209
1.27943	NA	0030+0024	0.00133439
1.27943	NA	0030+0024+Heparin	0.00182704
1.27943	NA	0030+Heparin	0.00257746
1.27943	NA	0032+0024	0.00491589
1.27943	NA	0032+0024+Heparin	0.00414801
1.27943	NA	0032+Heparin	0.00252131
1.28784	NA	0030+0024	0.00133681
1.28784	NA	0030+0024+Heparin	0.00183462
1.28784	NA	0030+Heparin	0.00258125
1.28784	NA	0032+0024	0.00492261
1.28784	NA	0032+0024+Heparin	0.0041392
1.28784	NA	0032+Heparin	0.00252723
1.29626	NA	0030+0024	0.00133624
1.29626	NA	0030+0024+Heparin	0.00184277
1.29626	NA	0030+Heparin	0.00258379
1.29626	NA	0032+0024	0.00493286
1.29626	NA	0032+0024+Heparin	0.00413219
1.29626	NA	0032+Heparin	0.00253595
1.30468	NA	0030+0024	0.00133163
1.30468	NA	0030+0024+Heparin	0.00185195
1.30468	NA	0030+Heparin	0.00258483
1.30468	NA	0032+0024	0.00494488
1.30468	NA	0032+0024+Heparin	0.00412444
1.30468	NA	0032+Heparin	0.00254474
1.3131	NA	0030+0024	0.00132335
1.3131	NA	0030+0024+Heparin	0.00186093
1.3131	NA	0030+Heparin	0.00258483
1.3131	NA	0032+0024	0.00495617
1.3131	NA	0032+0024+Heparin	0.00411456
1.3131	NA	0032+Heparin	0.00255214
1.32151	NA	0030+0024	0.00131339
1.32151	NA	0030+0024+Heparin	0.00186715
1.32151	NA	0030+Heparin	0.00258426
1.32151	NA	0032+0024	0.00496479
1.32151	NA	0032+0024+Heparin	0.00410331
1.32151	NA	0032+Heparin	0.0025578
1.32993	NA	0030+0024	0.00130487
1.32993	NA	0030+0024+Heparin	0.00186819
1.32993	NA	0030+Heparin	0.00258313
1.32993	NA	0032+0024	0.00496987
1.32993	NA	0032+0024+Heparin	0.00409333
1.32993	NA	0032+Heparin	0.00256174
1.33835	NA	0030+0024	0.00130033
1.33835	NA	0030+0024+Heparin	0.00186362
1.33835	NA	0030+Heparin	0.00258094
1.33835	NA	0032+0024	0.00497071
1.33835	NA	0032+0024+Heparin	0.00408689
1.33835	NA	0032+Heparin	0.00256353
1.34676	NA	0030+0024	0.00129966
1.34676	NA	0030+0024+Heparin	0.00185567
1.34676	NA	0030+Heparin	0.00257684
1.34676	NA	0032+0024	0.00496578
1.34676	NA	0032+0024+Heparin	0.00408378
1.34676	NA	0032+Heparin	0.00256173
1.35518	NA	0030+0024	0.00130059
1.35518	NA	0030+0024+Heparin	0.00184711
1.35518	NA	0030+Heparin	0.00256997
1.35518	NA	0032+0024	0.00495402
1.35518	NA	0032+0024+Heparin	0.00408193
1.35518	NA	0032+Heparin	0.00255491
1.3636	NA	0030+0024	0.00130074
1.3636	NA	0030+0024+Heparin	0.00183918
1.3636	NA	0030+Heparin	0.00256019
1.3636	NA	0032+0024	0.00493786
1.3636	NA	0032+0024+Heparin	0.00407896
1.3636	NA	0032+Heparin	0.00254306
1.37202	NA	0030+0024	0.00129812
1.37202	NA	0030+0024+Heparin	0.001832
1.37202	NA	0030+Heparin	0.00254895
1.37202	NA	0032+0024	0.0049226
1.37202	NA	0032+0024+Heparin	0.00407279
1.37202	NA	0032+Heparin	0.00252765
1.38043	NA	0030+0024	0.00129111
1.38043	NA	0030+0024+Heparin	0.00182553
1.38043	NA	0030+Heparin	0.00253884
1.38043	NA	0032+0024	0.0049116
1.38043	NA	0032+0024+Heparin	0.00406224
1.38043	NA	0032+Heparin	0.00251172
1.38885	NA	0030+0024	0.00128044
1.38885	NA	0030+0024+Heparin	0.00181981
1.38885	NA	0030+Heparin	0.00253161
1.38885	NA	0032+0024	0.00490371
1.38885	NA	0032+0024+Heparin	0.00404845
1.38885	NA	0032+Heparin	0.00249951
1.39727	NA	0030+0024	0.00127034
1.39727	NA	0030+0024+Heparin	0.00181512
1.39727	NA	0030+Heparin	0.00252706
1.39727	NA	0032+0024	0.00489578
1.39727	NA	0032+0024+Heparin	0.00403433
1.39727	NA	0032+Heparin	0.00249387
1.40569	NA	0030+0024	0.00126506
1.40569	NA	0030+0024+Heparin	0.00181183
1.40569	NA	0030+Heparin	0.00252376
1.40569	NA	0032+0024	0.00488577
1.40569	NA	0032+0024+Heparin	0.0040214
1.40569	NA	0032+Heparin	0.00249425
1.4141	NA	0030+0024	0.00126481
1.4141	NA	0030+0024+Heparin	0.00181005
1.4141	NA	0030+Heparin	0.00252026
1.4141	NA	0032+0024	0.0048737
1.4141	NA	0032+0024+Heparin	0.00400888
1.4141	NA	0032+Heparin	0.00249827
1.42252	NA	0030+0024	0.00126684
1.42252	NA	0030+0024+Heparin	0.00180955
1.42252	NA	0030+Heparin	0.00251569
1.42252	NA	0032+0024	0.00486149
1.42252	NA	0032+0024+Heparin	0.00399596
1.42252	NA	0032+Heparin	0.00250395
1.43094	NA	0030+0024	0.00126891
1.43094	NA	0030+0024+Heparin	0.00181019
1.43094	NA	0030+Heparin	0.00250968
1.43094	NA	0032+0024	0.00485127
1.43094	NA	0032+0024+Heparin	0.00398387
1.43094	NA	0032+Heparin	0.00251018
1.43935	NA	0030+0024	0.00127084
1.43935	NA	0030+0024+Heparin	0.00181206
1.43935	NA	0030+Heparin	0.00250202
1.43935	NA	0032+0024	0.00484343
1.43935	NA	0032+0024+Heparin	0.00397492
1.43935	NA	0032+Heparin	0.00251583
1.44777	NA	0030+0024	0.00127359
1.44777	NA	0030+0024+Heparin	0.0018154
1.44777	NA	0030+Heparin	0.00249295
1.44777	NA	0032+0024	0.00483674
1.44777	NA	0032+0024+Heparin	0.00396952
1.44777	NA	0032+Heparin	0.00251893
1.45619	NA	0030+0024	0.00127736
1.45619	NA	0030+0024+Heparin	0.0018206
1.45619	NA	0030+Heparin	0.00248366
1.45619	NA	0032+0024	0.00482982
1.45619	NA	0032+0024+Heparin	0.00396611
1.45619	NA	0032+Heparin	0.00251756
1.46461	NA	0030+0024	0.00128131
1.46461	NA	0030+0024+Heparin	0.00182794
1.46461	NA	0030+Heparin	0.00247588
1.46461	NA	0032+0024	0.00482188
1.46461	NA	0032+0024+Heparin	0.00396292
1.46461	NA	0032+Heparin	0.00251182
1.47302	NA	0030+0024	0.00128425
1.47302	NA	0030+0024+Heparin	0.00183697
1.47302	NA	0030+Heparin	0.00247049
1.47302	NA	0032+0024	0.00481252
1.47302	NA	0032+0024+Heparin	0.00395872
1.47302	NA	0032+Heparin	0.00250378
1.48144	NA	0030+0024	0.00128477
1.48144	NA	0030+0024+Heparin	0.00184642
1.48144	NA	0030+Heparin	0.00246738
1.48144	NA	0032+0024	0.00480128
1.48144	NA	0032+0024+Heparin	0.00395303
1.48144	NA	0032+Heparin	0.00249551
1.48986	NA	0030+0024	0.00128155
1.48986	NA	0030+0024+Heparin	0.00185455
1.48986	NA	0030+Heparin	0.00246609
1.48986	NA	0032+0024	0.00478788
1.48986	NA	0032+0024+Heparin	0.00394652
1.48986	NA	0032+Heparin	0.00248777
1.49828	NA	0030+0024	0.00127491
1.49828	NA	0030+0024+Heparin	0.0018594
1.49828	NA	0030+Heparin	0.00246605
1.49828	NA	0032+0024	0.00477292
1.49828	NA	0032+0024+Heparin	0.00394039
1.49828	NA	0032+Heparin	0.00248045
1.50669	NA	0030+0024	0.00126741
1.50669	NA	0030+0024+Heparin	0.00185933
1.50669	NA	0030+Heparin	0.00246645
1.50669	NA	0032+0024	0.00475767
1.50669	NA	0032+0024+Heparin	0.00393482
1.50669	NA	0032+Heparin	0.00247324
1.51511	NA	0030+0024	0.00126146
1.51511	NA	0030+0024+Heparin	0.00185417
1.51511	NA	0030+Heparin	0.00246694
1.51511	NA	0032+0024	0.00474277
1.51511	NA	0032+0024+Heparin	0.00392893
1.51511	NA	0032+Heparin	0.00246596
1.52353	NA	0030+0024	0.00125714
1.52353	NA	0030+0024+Heparin	0.00184629
1.52353	NA	0030+Heparin	0.00246858
1.52353	NA	0032+0024	0.00472859
1.52353	NA	0032+0024+Heparin	0.00392196
1.52353	NA	0032+Heparin	0.00245868
1.53194	NA	0030+0024	0.00125255
1.53194	NA	0030+0024+Heparin	0.00183973
1.53194	NA	0030+Heparin	0.00247284
1.53194	NA	0032+0024	0.0047164
1.53194	NA	0032+0024+Heparin	0.00391422
1.53194	NA	0032+Heparin	0.00245157
1.54036	NA	0030+0024	0.00124542
1.54036	NA	0030+0024+Heparin	0.00183736
1.54036	NA	0030+Heparin	0.00247931
1.54036	NA	0032+0024	0.00470793
1.54036	NA	0032+0024+Heparin	0.00390709
1.54036	NA	0032+Heparin	0.00244439
1.54878	NA	0030+0024	0.00123548
1.54878	NA	0030+0024+Heparin	0.00183899
1.54878	NA	0030+Heparin	0.00248529
1.54878	NA	0032+0024	0.00470359
1.54878	NA	0032+0024+Heparin	0.00390193
1.54878	NA	0032+Heparin	0.00243671
1.5572	NA	0030+0024	0.00122562
1.5572	NA	0030+0024+Heparin	0.0018424
1.5572	NA	0030+Heparin	0.00248811
1.5572	NA	0032+0024	0.00470203
1.5572	NA	0032+0024+Heparin	0.00389876
1.5572	NA	0032+Heparin	0.00242851
1.56561	NA	0030+0024	0.00121904
1.56561	NA	0030+0024+Heparin	0.00184538
1.56561	NA	0030+Heparin	0.00248773
1.56561	NA	0032+0024	0.00470149
1.56561	NA	0032+0024+Heparin	0.00389629
1.56561	NA	0032+Heparin	0.0024209
1.57403	NA	0030+0024	0.00121578
1.57403	NA	0030+0024+Heparin	0.00184685
1.57403	NA	0030+Heparin	0.00248679
1.57403	NA	0032+0024	0.00470096
1.57403	NA	0032+0024+Heparin	0.00389278
1.57403	NA	0032+Heparin	0.00241525
1.58245	NA	0030+0024	0.00121321
1.58245	NA	0030+0024+Heparin	0.00184716
1.58245	NA	0030+Heparin	0.00248788
1.58245	NA	0032+0024	0.00470084
1.58245	NA	0032+0024+Heparin	0.00388704
1.58245	NA	0032+Heparin	0.00241146
1.59087	NA	0030+0024	0.00120867
1.59087	NA	0030+0024+Heparin	0.00184752
1.59087	NA	0030+Heparin	0.00249106
1.59087	NA	0032+0024	0.00470254
1.59087	NA	0032+0024+Heparin	0.00387911
1.59087	NA	0032+Heparin	0.00240792
1.59928	NA	0030+0024	0.00120189
1.59928	NA	0030+0024+Heparin	0.00184827
1.59928	NA	0030+Heparin	0.00249469
1.59928	NA	0032+0024	0.0047072
1.59928	NA	0032+0024+Heparin	0.00386999
1.59928	NA	0032+Heparin	0.00240331
1.6077	NA	0030+0024	0.0011955
1.6077	NA	0030+0024+Heparin	0.00184848
1.6077	NA	0030+Heparin	0.00249734
1.6077	NA	0032+0024	0.00471441
1.6077	NA	0032+0024+Heparin	0.0038609
1.6077	NA	0032+Heparin	0.0023979
1.61612	NA	0030+0024	0.00119276
1.61612	NA	0030+0024+Heparin	0.00184704
1.61612	NA	0030+Heparin	0.00249829
1.61612	NA	0032+0024	0.00472249
1.61612	NA	0032+0024+Heparin	0.00385283
1.61612	NA	0032+Heparin	0.00239302
1.62453	NA	0030+0024	0.00119453
1.62453	NA	0030+0024+Heparin	0.00184378
1.62453	NA	0030+Heparin	0.00249736
1.62453	NA	0032+0024	0.00472907
1.62453	NA	0032+0024+Heparin	0.00384632
1.62453	NA	0032+Heparin	0.00238921
1.63295	NA	0030+0024	0.00119937
1.63295	NA	0030+0024+Heparin	0.00183934
1.63295	NA	0030+Heparin	0.00249513
1.63295	NA	0032+0024	0.00473139
1.63295	NA	0032+0024+Heparin	0.00384116
1.63295	NA	0032+Heparin	0.0023856
1.64137	NA	0030+0024	0.00120536
1.64137	NA	0030+0024+Heparin	0.00183402
1.64137	NA	0030+Heparin	0.00249264
1.64137	NA	0032+0024	0.00472733
1.64137	NA	0032+0024+Heparin	0.00383666
1.64137	NA	0032+Heparin	0.00238121
1.64979	NA	0030+0024	0.00121128
1.64979	NA	0030+0024+Heparin	0.00182677
1.64979	NA	0030+Heparin	0.00249074
1.64979	NA	0032+0024	0.00471763
1.64979	NA	0032+0024+Heparin	0.00383229
1.64979	NA	0032+Heparin	0.00237617
1.6582	NA	0030+0024	0.00121677
1.6582	NA	0030+0024+Heparin	0.00181652
1.6582	NA	0030+Heparin	0.00248966
1.6582	NA	0032+0024	0.00470601
1.6582	NA	0032+0024+Heparin	0.00382795
1.6582	NA	0032+Heparin	0.00237123
1.66662	NA	0030+0024	0.00122187
1.66662	NA	0030+0024+Heparin	0.0018047
1.66662	NA	0030+Heparin	0.00248919
1.66662	NA	0032+0024	0.00469582
1.66662	NA	0032+0024+Heparin	0.00382377
1.66662	NA	0032+Heparin	0.00236634
1.67504	NA	0030+0024	0.0012262
1.67504	NA	0030+0024+Heparin	0.00179524
1.67504	NA	0030+Heparin	0.00248859
1.67504	NA	0032+0024	0.00468806
1.67504	NA	0032+0024+Heparin	0.00381982
1.67504	NA	0032+Heparin	0.00236092
1.68346	NA	0030+0024	0.00122857
1.68346	NA	0030+0024+Heparin	0.00179053
1.68346	NA	0030+Heparin	0.00248673
1.68346	NA	0032+0024	0.0046828
1.68346	NA	0032+0024+Heparin	0.00381598
1.68346	NA	0032+Heparin	0.00235557
1.69187	NA	0030+0024	0.00122771
1.69187	NA	0030+0024+Heparin	0.00178884
1.69187	NA	0030+Heparin	0.00248236
1.69187	NA	0032+0024	0.00468064
1.69187	NA	0032+0024+Heparin	0.00381209
1.69187	NA	0032+Heparin	0.0023527
1.70029	NA	0030+0024	0.00122443
1.70029	NA	0030+0024+Heparin	0.00178664
1.70029	NA	0030+Heparin	0.00247518
1.70029	NA	0032+0024	0.0046822
1.70029	NA	0032+0024+Heparin	0.00380827
1.70029	NA	0032+Heparin	0.00235509
1.70871	NA	0030+0024	0.00122247
1.70871	NA	0030+0024+Heparin	0.00178226
1.70871	NA	0030+Heparin	0.00246687
1.70871	NA	0032+0024	0.00468663
1.70871	NA	0032+0024+Heparin	0.00380516
1.70871	NA	0032+Heparin	0.00236315
1.71712	NA	0030+0024	0.00122536
1.71712	NA	0030+0024+Heparin	0.00177672
1.71712	NA	0030+Heparin	0.00245992
1.71712	NA	0032+0024	0.00469176
1.71712	NA	0032+0024+Heparin	0.00380318
1.71712	NA	0032+Heparin	0.00237396
1.72554	NA	0030+0024	0.00123279
1.72554	NA	0030+0024+Heparin	0.00177201
1.72554	NA	0030+Heparin	0.00245538
1.72554	NA	0032+0024	0.00469506
1.72554	NA	0032+0024+Heparin	0.00380168
1.72554	NA	0032+Heparin	0.00238355
1.73396	NA	0030+0024	0.0012414
1.73396	NA	0030+0024+Heparin	0.00176887
1.73396	NA	0030+Heparin	0.00245286
1.73396	NA	0032+0024	0.00469418
1.73396	NA	0032+0024+Heparin	0.0037997
1.73396	NA	0032+Heparin	0.00238899
1.74238	NA	0030+0024	0.00124757
1.74238	NA	0030+0024+Heparin	0.00176683
1.74238	NA	0030+Heparin	0.0024517
1.74238	NA	0032+0024	0.00468797
1.74238	NA	0032+0024+Heparin	0.00379738
1.74238	NA	0032+Heparin	0.00238883
1.75079	NA	0030+0024	0.00124877
1.75079	NA	0030+0024+Heparin	0.00176562
1.75079	NA	0030+Heparin	0.0024512
1.75079	NA	0032+0024	0.0046777
1.75079	NA	0032+0024+Heparin	0.00379573
1.75079	NA	0032+Heparin	0.00238376
1.75921	NA	0030+0024	0.00124468
1.75921	NA	0030+0024+Heparin	0.00176544
1.75921	NA	0030+Heparin	0.00245038
1.75921	NA	0032+0024	0.00466608
1.75921	NA	0032+0024+Heparin	0.00379508
1.75921	NA	0032+Heparin	0.00237625
1.76763	NA	0030+0024	0.00123776
1.76763	NA	0030+0024+Heparin	0.0017662
1.76763	NA	0030+Heparin	0.00244827
1.76763	NA	0032+0024	0.00465551
1.76763	NA	0032+0024+Heparin	0.0037951
1.76763	NA	0032+Heparin	0.00236855
1.77605	NA	0030+0024	0.00123095
1.77605	NA	0030+0024+Heparin	0.00176714
1.77605	NA	0030+Heparin	0.00244485
1.77605	NA	0032+0024	0.00464762
1.77605	NA	0032+0024+Heparin	0.00379567
1.77605	NA	0032+Heparin	0.00236175
1.78446	NA	0030+0024	0.00122522
1.78446	NA	0030+0024+Heparin	0.0017673
1.78446	NA	0030+Heparin	0.0024414
1.78446	NA	0032+0024	0.00464325
1.78446	NA	0032+0024+Heparin	0.00379675
1.78446	NA	0032+Heparin	0.00235675
1.79288	NA	0030+0024	0.00121986
1.79288	NA	0030+0024+Heparin	0.00176631
1.79288	NA	0030+Heparin	0.00243942
1.79288	NA	0032+0024	0.00464192
1.79288	NA	0032+0024+Heparin	0.00379758
1.79288	NA	0032+Heparin	0.00235461
1.8013	NA	0030+0024	0.00121418
1.8013	NA	0030+0024+Heparin	0.00176444
1.8013	NA	0030+Heparin	0.00243969
1.8013	NA	0032+0024	0.00464149
1.8013	NA	0032+0024+Heparin	0.00379707
1.8013	NA	0032+Heparin	0.0023554
1.80971	NA	0030+0024	0.00120842
1.80971	NA	0030+0024+Heparin	0.00176223
1.80971	NA	0030+Heparin	0.00244228
1.80971	NA	0032+0024	0.0046391
1.80971	NA	0032+0024+Heparin	0.00379479
1.80971	NA	0032+Heparin	0.00235743
1.81813	NA	0030+0024	0.00120353
1.81813	NA	0030+0024+Heparin	0.00176042
1.81813	NA	0030+Heparin	0.00244656
1.81813	NA	0032+0024	0.00463283
1.81813	NA	0032+0024+Heparin	0.003791
1.81813	NA	0032+Heparin	0.00235862
1.82655	NA	0030+0024	0.00119985
1.82655	NA	0030+0024+Heparin	0.00175962
1.82655	NA	0030+Heparin	0.00245103
1.82655	NA	0032+0024	0.0046228
1.82655	NA	0032+0024+Heparin	0.00378578
1.82655	NA	0032+Heparin	0.00235828
1.83497	NA	0030+0024	0.00119671
1.83497	NA	0030+0024+Heparin	0.00175972
1.83497	NA	0030+Heparin	0.0024542
1.83497	NA	0032+0024	0.00461165
1.83497	NA	0032+0024+Heparin	0.00377904
1.83497	NA	0032+Heparin	0.002357
1.84338	NA	0030+0024	0.00119344
1.84338	NA	0030+0024+Heparin	0.00176029
1.84338	NA	0030+Heparin	0.00245554
1.84338	NA	0032+0024	0.00460354
1.84338	NA	0032+0024+Heparin	0.00377166
1.84338	NA	0032+Heparin	0.00235524
1.8518	NA	0030+0024	0.00119063
1.8518	NA	0030+0024+Heparin	0.00176136
1.8518	NA	0030+Heparin	0.00245532
1.8518	NA	0032+0024	0.00460163
1.8518	NA	0032+0024+Heparin	0.00376572
1.8518	NA	0032+Heparin	0.0023528
1.86022	NA	0030+0024	0.00119015
1.86022	NA	0030+0024+Heparin	0.00176347
1.86022	NA	0030+Heparin	0.00245373
1.86022	NA	0032+0024	0.0046056
1.86022	NA	0032+0024+Heparin	0.00376279
1.86022	NA	0032+Heparin	0.0023492
1.86864	NA	0030+0024	0.00119333
1.86864	NA	0030+0024+Heparin	0.00176695
1.86864	NA	0030+Heparin	0.00245073
1.86864	NA	0032+0024	0.00461199
1.86864	NA	0032+0024+Heparin	0.00376276
1.86864	NA	0032+Heparin	0.00234407
1.87705	NA	0030+0024	0.00119933
1.87705	NA	0030+0024+Heparin	0.00177184
1.87705	NA	0030+Heparin	0.00244666
1.87705	NA	0032+0024	0.0046166
1.87705	NA	0032+0024+Heparin	0.00376438
1.87705	NA	0032+Heparin	0.00233748
1.88547	NA	0030+0024	0.00120602
1.88547	NA	0030+0024+Heparin	0.00177785
1.88547	NA	0030+Heparin	0.00244263
1.88547	NA	0032+0024	0.00461666
1.88547	NA	0032+0024+Heparin	0.00376585
1.88547	NA	0032+Heparin	0.00233047
1.89389	NA	0030+0024	0.00121198
1.89389	NA	0030+0024+Heparin	0.00178414
1.89389	NA	0030+Heparin	0.00243941
1.89389	NA	0032+0024	0.00461274
1.89389	NA	0032+0024+Heparin	0.00376511
1.89389	NA	0032+Heparin	0.00232504
1.9023	NA	0030+0024	0.00121689
1.9023	NA	0030+0024+Heparin	0.00178969
1.9023	NA	0030+Heparin	0.00243604
1.9023	NA	0032+0024	0.00460849
1.9023	NA	0032+0024+Heparin	0.00376079
1.9023	NA	0032+Heparin	0.00232269
1.91072	NA	0030+0024	0.00122082
1.91072	NA	0030+0024+Heparin	0.00179369
1.91072	NA	0030+Heparin	0.00243067
1.91072	NA	0032+0024	0.0046065
1.91072	NA	0032+0024+Heparin	0.00375323
1.91072	NA	0032+Heparin	0.00232304
1.91914	NA	0030+0024	0.00122312
1.91914	NA	0030+0024+Heparin	0.00179554
1.91914	NA	0030+Heparin	0.00242235
1.91914	NA	0032+0024	0.00460598
1.91914	NA	0032+0024+Heparin	0.00374426
1.91914	NA	0032+Heparin	0.00232432
1.92756	NA	0030+0024	0.00122218
1.92756	NA	0030+0024+Heparin	0.00179458
1.92756	NA	0030+Heparin	0.00241201
1.92756	NA	0032+0024	0.00460501
1.92756	NA	0032+0024+Heparin	0.00373587
1.92756	NA	0032+Heparin	0.00232478
1.93597	NA	0030+0024	0.00121646
1.93597	NA	0030+0024+Heparin	0.00179002
1.93597	NA	0030+Heparin	0.00240147
1.93597	NA	0032+0024	0.00460255
1.93597	NA	0032+0024+Heparin	0.00372948
1.93597	NA	0032+Heparin	0.00232344
1.94439	NA	0030+0024	0.0012068
1.94439	NA	0030+0024+Heparin	0.00178172
1.94439	NA	0030+Heparin	0.00239157
1.94439	NA	0032+0024	0.00459855
1.94439	NA	0032+0024+Heparin	0.00372565
1.94439	NA	0032+Heparin	0.00231998
1.95281	NA	0030+0024	0.00119681
1.95281	NA	0030+0024+Heparin	0.00177111
1.95281	NA	0030+Heparin	0.00238142
1.95281	NA	0032+0024	0.0045931
1.95281	NA	0032+0024+Heparin	0.003724
1.95281	NA	0032+Heparin	0.00231428
1.96123	NA	0030+0024	0.00118993
1.96123	NA	0030+0024+Heparin	0.00176063
1.96123	NA	0030+Heparin	0.0023693
1.96123	NA	0032+0024	0.00458576
1.96123	NA	0032+0024+Heparin	0.00372353
1.96123	NA	0032+Heparin	0.00230608
1.96964	NA	0030+0024	0.00118697
1.96964	NA	0030+0024+Heparin	0.00175176
1.96964	NA	0030+Heparin	0.00235411
1.96964	NA	0032+0024	0.00457558
1.96964	NA	0032+0024+Heparin	0.00372314
1.96964	NA	0032+Heparin	0.0022958
1.97806	NA	0030+0024	0.00118668
1.97806	NA	0030+0024+Heparin	0.00174438
1.97806	NA	0030+Heparin	0.00233694
1.97806	NA	0032+0024	0.00456238
1.97806	NA	0032+0024+Heparin	0.00372184
1.97806	NA	0032+Heparin	0.00228493
1.98648	NA	0030+0024	0.00118724
1.98648	NA	0030+0024+Heparin	0.00173817
1.98648	NA	0030+Heparin	0.00232071
1.98648	NA	0032+0024	0.00454808
1.98648	NA	0032+0024+Heparin	0.00371914
1.98648	NA	0032+Heparin	0.00227496
1.99489	NA	0030+0024	0.00118717
1.99489	NA	0030+0024+Heparin	0.00173386
1.99489	NA	0030+Heparin	0.0023079
1.99489	NA	0032+0024	0.00453556
1.99489	NA	0032+0024+Heparin	0.00371519
1.99489	NA	0032+Heparin	0.00226713
2.00331	NA	0030+0024	0.00118542
2.00331	NA	0030+0024+Heparin	0.00173292
2.00331	NA	0030+Heparin	0.00230012
2.00331	NA	0032+0024	0.00452586
2.00331	NA	0032+0024+Heparin	0.00371014
2.00331	NA	0032+Heparin	0.00226299
2.01173	NA	0030+0024	0.00118144
2.01173	NA	0030+0024+Heparin	0.00173562
2.01173	NA	0030+Heparin	0.0022987
2.01173	NA	0032+0024	0.00451797
2.01173	NA	0032+0024+Heparin	0.00370429
2.01173	NA	0032+Heparin	0.00226361
2.02015	NA	0030+0024	0.0011758
2.02015	NA	0030+0024+Heparin	0.00173992
2.02015	NA	0030+Heparin	0.00230347
2.02015	NA	0032+0024	0.00451055
2.02015	NA	0032+0024+Heparin	0.00369892
2.02015	NA	0032+Heparin	0.00226791
2.02856	NA	0030+0024	0.00116995
2.02856	NA	0030+0024+Heparin	0.00174297
2.02856	NA	0030+Heparin	0.0023117
2.02856	NA	0032+0024	0.00450282
2.02856	NA	0032+0024+Heparin	0.00369613
2.02856	NA	0032+Heparin	0.00227314
2.03698	NA	0030+0024	0.00116464
2.03698	NA	0030+0024+Heparin	0.00174299
2.03698	NA	0030+Heparin	0.00231978
2.03698	NA	0032+0024	0.0044943
2.03698	NA	0032+0024+Heparin	0.00369689
2.03698	NA	0032+Heparin	0.00227645
2.0454	NA	0030+0024	0.00115939
2.0454	NA	0030+0024+Heparin	0.00173999
2.0454	NA	0030+Heparin	0.00232532
2.0454	NA	0032+0024	0.00448412
2.0454	NA	0032+0024+Heparin	0.00369981
2.0454	NA	0032+Heparin	0.00227593
2.05382	NA	0030+0024	0.00115297
2.05382	NA	0030+0024+Heparin	0.00173544
2.05382	NA	0030+Heparin	0.00232795
2.05382	NA	0032+0024	0.00447112
2.05382	NA	0032+0024+Heparin	0.00370221
2.05382	NA	0032+Heparin	0.00227168
2.06223	NA	0030+0024	0.00114419
2.06223	NA	0030+0024+Heparin	0.00173103
2.06223	NA	0030+Heparin	0.00232906
2.06223	NA	0032+0024	0.00445549
2.06223	NA	0032+0024+Heparin	0.00370181
2.06223	NA	0032+Heparin	0.00226573
2.07065	NA	0030+0024	0.00113337
2.07065	NA	0030+0024+Heparin	0.0017279
2.07065	NA	0030+Heparin	0.00233009
2.07065	NA	0032+0024	0.00443991
2.07065	NA	0032+0024+Heparin	0.0036975
2.07065	NA	0032+Heparin	0.0022597
2.07907	NA	0030+0024	0.00112275
2.07907	NA	0030+0024+Heparin	0.00172663
2.07907	NA	0030+Heparin	0.00233125
2.07907	NA	0032+0024	0.00442709
2.07907	NA	0032+0024+Heparin	0.00368961
2.07907	NA	0032+Heparin	0.00225362
2.08748	NA	0030+0024	0.0011143
2.08748	NA	0030+0024+Heparin	0.00172722
2.08748	NA	0030+Heparin	0.00233204
2.08748	NA	0032+0024	0.00441688
2.08748	NA	0032+0024+Heparin	0.00367914
2.08748	NA	0032+Heparin	0.00224678
2.0959	NA	0030+0024	0.00110818
2.0959	NA	0030+0024+Heparin	0.00172944
2.0959	NA	0030+Heparin	0.00233205
2.0959	NA	0032+0024	0.00440732
2.0959	NA	0032+0024+Heparin	0.00366692
2.0959	NA	0032+Heparin	0.00223891
2.10432	NA	0030+0024	0.00110352
2.10432	NA	0030+0024+Heparin	0.00173279
2.10432	NA	0030+Heparin	0.00233149
2.10432	NA	0032+0024	0.00439753
2.10432	NA	0032+0024+Heparin	0.00365315
2.10432	NA	0032+Heparin	0.00223073
2.11274	NA	0030+0024	0.00109927
2.11274	NA	0030+0024+Heparin	0.00173613
2.11274	NA	0030+Heparin	0.00233111
2.11274	NA	0032+0024	0.00438846
2.11274	NA	0032+0024+Heparin	0.00363843
2.11274	NA	0032+Heparin	0.00222374
2.12115	NA	0030+0024	0.00109435
2.12115	NA	0030+0024+Heparin	0.00173779
2.12115	NA	0030+Heparin	0.00233134
2.12115	NA	0032+0024	0.00438124
2.12115	NA	0032+0024+Heparin	0.00362544
2.12115	NA	0032+Heparin	0.00221942
2.12957	NA	0030+0024	0.00108786
2.12957	NA	0030+0024+Heparin	0.00173641
2.12957	NA	0030+Heparin	0.00233178
2.12957	NA	0032+0024	0.00437584
2.12957	NA	0032+0024+Heparin	0.00361776
2.12957	NA	0032+Heparin	0.00221823
2.13799	NA	0030+0024	0.00107991
2.13799	NA	0030+0024+Heparin	0.00173238
2.13799	NA	0030+Heparin	0.00233195
2.13799	NA	0032+0024	0.00437132
2.13799	NA	0032+0024+Heparin	0.00361642
2.13799	NA	0032+Heparin	0.00221911
2.14641	NA	0030+0024	0.00107246
2.14641	NA	0030+0024+Heparin	0.00172785
2.14641	NA	0030+Heparin	0.00233218
2.14641	NA	0032+0024	0.00436648
2.14641	NA	0032+0024+Heparin	0.00361936
2.14641	NA	0032+Heparin	0.00222018
2.15482	NA	0030+0024	0.00106865
2.15482	NA	0030+0024+Heparin	0.0017243
2.15482	NA	0030+Heparin	0.00233335
2.15482	NA	0032+0024	0.00436013
2.15482	NA	0032+0024+Heparin	0.00362356
2.15482	NA	0032+Heparin	0.00221991
2.16324	NA	0030+0024	0.0010703
2.16324	NA	0030+0024+Heparin	0.00172143
2.16324	NA	0030+Heparin	0.00233551
2.16324	NA	0032+0024	0.00435144
2.16324	NA	0032+0024+Heparin	0.00362634
2.16324	NA	0032+Heparin	0.00221728
2.17166	NA	0030+0024	0.00107633
2.17166	NA	0030+0024+Heparin	0.00171836
2.17166	NA	0030+Heparin	0.00233765
2.17166	NA	0032+0024	0.00434054
2.17166	NA	0032+0024+Heparin	0.00362537
2.17166	NA	0032+Heparin	0.00221188
2.18007	NA	0030+0024	0.00108396
2.18007	NA	0030+0024+Heparin	0.00171463
2.18007	NA	0030+Heparin	0.00233873
2.18007	NA	0032+0024	0.00432893
2.18007	NA	0032+0024+Heparin	0.00361891
2.18007	NA	0032+Heparin	0.00220502
2.18849	NA	0030+0024	0.00109063
2.18849	NA	0030+0024+Heparin	0.00170999
2.18849	NA	0030+Heparin	0.00233849
2.18849	NA	0032+0024	0.00431894
2.18849	NA	0032+0024+Heparin	0.00360684
2.18849	NA	0032+Heparin	0.00219979
2.19691	NA	0030+0024	0.00109428
2.19691	NA	0030+0024+Heparin	0.00170381
2.19691	NA	0030+Heparin	0.00233723
2.19691	NA	0032+0024	0.00431199
2.19691	NA	0032+0024+Heparin	0.0035914
2.19691	NA	0032+Heparin	0.00219836
2.20533	NA	0030+0024	0.00109321
2.20533	NA	0030+0024+Heparin	0.00169558
2.20533	NA	0030+Heparin	0.00233513
2.20533	NA	0032+0024	0.00430744
2.20533	NA	0032+0024+Heparin	0.00357635
2.20533	NA	0032+Heparin	0.00220015
2.21374	NA	0030+0024	0.00108751
2.21374	NA	0030+0024+Heparin	0.00168644
2.21374	NA	0030+Heparin	0.00233216
2.21374	NA	0032+0024	0.00430314
2.21374	NA	0032+0024+Heparin	0.00356443
2.21374	NA	0032+Heparin	0.00220276
2.22216	NA	0030+0024	0.0010798
2.22216	NA	0030+0024+Heparin	0.00167941
2.22216	NA	0030+Heparin	0.00232821
2.22216	NA	0032+0024	0.00429702
2.22216	NA	0032+0024+Heparin	0.0035558
2.22216	NA	0032+Heparin	0.00220378
2.23058	NA	0030+0024	0.00107265
2.23058	NA	0030+0024+Heparin	0.00167671
2.23058	NA	0030+Heparin	0.00232319
2.23058	NA	0032+0024	0.00428834
2.23058	NA	0032+0024+Heparin	0.00354919
2.23058	NA	0032+Heparin	0.00220224
2.239	NA	0030+0024	0.0010661
2.239	NA	0030+0024+Heparin	0.00167819
2.239	NA	0030+Heparin	0.00231769
2.239	NA	0032+0024	0.00427765
2.239	NA	0032+0024+Heparin	0.00354354
2.239	NA	0032+Heparin	0.00219979
2.24741	NA	0030+0024	0.00105893
2.24741	NA	0030+0024+Heparin	0.00168229
2.24741	NA	0030+Heparin	0.00231312
2.24741	NA	0032+0024	0.00426573
2.24741	NA	0032+0024+Heparin	0.00353848
2.24741	NA	0032+Heparin	0.00219983
2.25583	NA	0030+0024	0.00105114
2.25583	NA	0030+0024+Heparin	0.00168716
2.25583	NA	0030+Heparin	0.00231059
2.25583	NA	0032+0024	0.00425347
2.25583	NA	0032+0024+Heparin	0.00353456
2.25583	NA	0032+Heparin	0.00220394
2.26425	NA	0030+0024	0.00104383
2.26425	NA	0030+0024+Heparin	0.00169086
2.26425	NA	0030+Heparin	0.00230989
2.26425	NA	0032+0024	0.00424233
2.26425	NA	0032+0024+Heparin	0.00353285
2.26425	NA	0032+Heparin	0.00221006
2.27266	NA	0030+0024	0.00103773
2.27266	NA	0030+0024+Heparin	0.00169171
2.27266	NA	0030+Heparin	0.00231
2.27266	NA	0032+0024	0.00423406
2.27266	NA	0032+0024+Heparin	0.00353376
2.27266	NA	0032+Heparin	0.00221476
2.28108	NA	0030+0024	0.00103316
2.28108	NA	0030+0024+Heparin	0.00168882
2.28108	NA	0030+Heparin	0.00231033
2.28108	NA	0032+0024	0.00422985
2.28108	NA	0032+0024+Heparin	0.00353628
2.28108	NA	0032+Heparin	0.002216
2.2895	NA	0030+0024	0.0010311
2.2895	NA	0030+0024+Heparin	0.001682
2.2895	NA	0030+Heparin	0.00231172
2.2895	NA	0032+0024	0.00423035
2.2895	NA	0032+0024+Heparin	0.00353884
2.2895	NA	0032+Heparin	0.00221408
2.29792	NA	0030+0024	0.00103295
2.29792	NA	0030+0024+Heparin	0.00167178
2.29792	NA	0030+Heparin	0.00231564
2.29792	NA	0032+0024	0.00423502
2.29792	NA	0032+0024+Heparin	0.00354029
2.29792	NA	0032+Heparin	0.00221096
2.30633	NA	0030+0024	0.00103896
2.30633	NA	0030+0024+Heparin	0.00166019
2.30633	NA	0030+Heparin	0.00232222
2.30633	NA	0032+0024	0.00424151
2.30633	NA	0032+0024+Heparin	0.00354002
2.30633	NA	0032+Heparin	0.00220822
2.31475	NA	0030+0024	0.00104752
2.31475	NA	0030+0024+Heparin	0.00165018
2.31475	NA	0030+Heparin	0.00232973
2.31475	NA	0032+0024	0.00424703
2.31475	NA	0032+0024+Heparin	0.00353771
2.31475	NA	0032+Heparin	0.00220601
2.32317	NA	0030+0024	0.00105635
2.32317	NA	0030+0024+Heparin	0.00164314
2.32317	NA	0030+Heparin	0.00233593
2.32317	NA	0032+0024	0.00424998
2.32317	NA	0032+0024+Heparin	0.00353327
2.32317	NA	0032+Heparin	0.00220347
2.33159	NA	0030+0024	0.00106386
2.33159	NA	0030+0024+Heparin	0.00163805
2.33159	NA	0030+Heparin	0.00233984
2.33159	NA	0032+0024	0.0042501
2.33159	NA	0032+0024+Heparin	0.0035269
2.33159	NA	0032+Heparin	0.00219938
2.34	NA	0030+0024	0.00106973
2.34	NA	0030+0024+Heparin	0.00163308
2.34	NA	0030+Heparin	0.00234241
2.34	NA	0032+0024	0.00424759
2.34	NA	0032+0024+Heparin	0.00351883
2.34	NA	0032+Heparin	0.00219298
2.34842	NA	0030+0024	0.00107528
2.34842	NA	0030+0024+Heparin	0.00162708
2.34842	NA	0030+Heparin	0.0023453
2.34842	NA	0032+0024	0.00424241
2.34842	NA	0032+0024+Heparin	0.00350932
2.34842	NA	0032+Heparin	0.00218491
2.35684	NA	0030+0024	0.0010828
2.35684	NA	0030+0024+Heparin	0.0016197
2.35684	NA	0030+Heparin	0.00234874
2.35684	NA	0032+0024	0.00423528
2.35684	NA	0032+0024+Heparin	0.003499
2.35684	NA	0032+Heparin	0.00217683
2.36525	NA	0030+0024	0.00109304
2.36525	NA	0030+0024+Heparin	0.00161109
2.36525	NA	0030+Heparin	0.00235154
2.36525	NA	0032+0024	0.00422884
2.36525	NA	0032+0024+Heparin	0.00348888
2.36525	NA	0032+Heparin	0.00217014
2.37367	NA	0030+0024	0.00110379
2.37367	NA	0030+0024+Heparin	0.00160228
2.37367	NA	0030+Heparin	0.00235227
2.37367	NA	0032+0024	0.0042259
2.37367	NA	0032+0024+Heparin	0.00347949
2.37367	NA	0032+Heparin	0.00216545
2.38209	NA	0030+0024	0.00111137
2.38209	NA	0030+0024+Heparin	0.00159529
2.38209	NA	0030+Heparin	0.00234954
2.38209	NA	0032+0024	0.00422651
2.38209	NA	0032+0024+Heparin	0.00347053
2.38209	NA	0032+Heparin	0.00216268
2.39051	NA	0030+0024	0.00111262
2.39051	NA	0030+0024+Heparin	0.00159146
2.39051	NA	0030+Heparin	0.00234276
2.39051	NA	0032+0024	0.00422826
2.39051	NA	0032+0024+Heparin	0.00346138
2.39051	NA	0032+Heparin	0.00216095
2.39892	NA	0030+0024	0.00110656
2.39892	NA	0030+0024+Heparin	0.00159006
2.39892	NA	0030+Heparin	0.00233282
2.39892	NA	0032+0024	0.00422861
2.39892	NA	0032+0024+Heparin	0.00345196
2.39892	NA	0032+Heparin	0.00215896
2.40734	NA	0030+0024	0.00109499
2.40734	NA	0030+0024+Heparin	0.00158925
2.40734	NA	0030+Heparin	0.00232178
2.40734	NA	0032+0024	0.00422613
2.40734	NA	0032+0024+Heparin	0.00344308
2.40734	NA	0032+Heparin	0.00215549
2.41576	NA	0030+0024	0.00108064
2.41576	NA	0030+0024+Heparin	0.00158752
2.41576	NA	0030+Heparin	0.00231142
2.41576	NA	0032+0024	0.00422105
2.41576	NA	0032+0024+Heparin	0.00343567
2.41576	NA	0032+Heparin	0.00214981
2.42418	NA	0030+0024	0.00106542
2.42418	NA	0030+0024+Heparin	0.00158391
2.42418	NA	0030+Heparin	0.00230245
2.42418	NA	0032+0024	0.0042148
2.42418	NA	0032+0024+Heparin	0.00342942
2.42418	NA	0032+Heparin	0.00214212
2.43259	NA	0030+0024	0.00105118
2.43259	NA	0030+0024+Heparin	0.00157805
2.43259	NA	0030+Heparin	0.00229496
2.43259	NA	0032+0024	0.00420896
2.43259	NA	0032+0024+Heparin	0.00342323
2.43259	NA	0032+Heparin	0.00213383
2.44101	NA	0030+0024	0.00104034
2.44101	NA	0030+0024+Heparin	0.00157083
2.44101	NA	0030+Heparin	0.00228916
2.44101	NA	0032+0024	0.00420414
2.44101	NA	0032+0024+Heparin	0.00341694
2.44101	NA	0032+Heparin	0.00212718
2.44943	NA	0030+0024	0.00103473
2.44943	NA	0030+0024+Heparin	0.00156419
2.44943	NA	0030+Heparin	0.00228516
2.44943	NA	0032+0024	0.0041996
2.44943	NA	0032+0024+Heparin	0.00341181
2.44943	NA	0032+Heparin	0.00212426
2.45784	NA	0030+0024	0.00103489
2.45784	NA	0030+0024+Heparin	0.00155969
2.45784	NA	0030+Heparin	0.00228227
2.45784	NA	0032+0024	0.00419363
2.45784	NA	0032+0024+Heparin	0.00340893
2.45784	NA	0032+Heparin	0.0021255
2.46626	NA	0030+0024	0.00103995
2.46626	NA	0030+0024+Heparin	0.00155771
2.46626	NA	0030+Heparin	0.00227923
2.46626	NA	0032+0024	0.00418508
2.46626	NA	0032+0024+Heparin	0.00340763
2.46626	NA	0032+Heparin	0.00212897
2.47468	NA	0030+0024	0.00104745
2.47468	NA	0030+0024+Heparin	0.00155817
2.47468	NA	0030+Heparin	0.00227506
2.47468	NA	0032+0024	0.00417537
2.47468	NA	0032+0024+Heparin	0.00340649
2.47468	NA	0032+Heparin	0.00213179
2.4831	NA	0030+0024	0.0010544
2.4831	NA	0030+0024+Heparin	0.00156113
2.4831	NA	0030+Heparin	0.00226953
2.4831	NA	0032+0024	0.00416844
2.4831	NA	0032+0024+Heparin	0.00340553
2.4831	NA	0032+Heparin	0.00213201
2.49151	NA	0030+0024	0.00105857
2.49151	NA	0030+0024+Heparin	0.00156655
2.49151	NA	0030+Heparin	0.00226328
2.49151	NA	0032+0024	0.00416689
2.49151	NA	0032+0024+Heparin	0.00340668
2.49151	NA	0032+Heparin	0.00212953
2.49993	NA	0030+0024	0.00105976
2.49993	NA	0030+0024+Heparin	0.00157388
2.49993	NA	0030+Heparin	0.00225713
2.49993	NA	0032+0024	0.00416931
2.49993	NA	0032+0024+Heparin	0.00341134
2.49993	NA	0032+Heparin	0.00212577
2.50835	NA	0030+0024	0.00106012
2.50835	NA	0030+0024+Heparin	0.0015819
2.50835	NA	0030+Heparin	0.00225102
2.50835	NA	0032+0024	0.00417224
2.50835	NA	0032+0024+Heparin	0.00341843
2.50835	NA	0032+Heparin	0.00212206
2.51677	NA	0030+0024	0.00106195
2.51677	NA	0030+0024+Heparin	0.0015894
2.51677	NA	0030+Heparin	0.00224399
2.51677	NA	0032+0024	0.00417259
2.51677	NA	0032+0024+Heparin	0.00342579
2.51677	NA	0032+Heparin	0.00211869
2.52518	NA	0030+0024	0.00106552
2.52518	NA	0030+0024+Heparin	0.00159574
2.52518	NA	0030+Heparin	0.0022352
2.52518	NA	0032+0024	0.0041682
2.52518	NA	0032+0024+Heparin	0.0034321
2.52518	NA	0032+Heparin	0.00211537
2.5336	NA	0030+0024	0.00106992
2.5336	NA	0030+0024+Heparin	0.00160055
2.5336	NA	0030+Heparin	0.00222526
2.5336	NA	0032+0024	0.00415834
2.5336	NA	0032+0024+Heparin	0.00343698
2.5336	NA	0032+Heparin	0.00211215
2.54202	NA	0030+0024	0.00107489
2.54202	NA	0030+0024+Heparin	0.00160313
2.54202	NA	0030+Heparin	0.00221569
2.54202	NA	0032+0024	0.00414489
2.54202	NA	0032+0024+Heparin	0.00344046
2.54202	NA	0032+Heparin	0.00210998
2.55043	NA	0030+0024	0.00108083
2.55043	NA	0030+0024+Heparin	0.0016028
2.55043	NA	0030+Heparin	0.00220707
2.55043	NA	0032+0024	0.00413147
2.55043	NA	0032+0024+Heparin	0.00344285
2.55043	NA	0032+Heparin	0.00210989
2.55885	NA	0030+0024	0.00108771
2.55885	NA	0030+0024+Heparin	0.00159996
2.55885	NA	0030+Heparin	0.00219886
2.55885	NA	0032+0024	0.00412113
2.55885	NA	0032+0024+Heparin	0.00344444
2.55885	NA	0032+Heparin	0.00211165
2.56727	NA	0030+0024	0.00109451
2.56727	NA	0030+0024+Heparin	0.00159602
2.56727	NA	0030+Heparin	0.00219065
2.56727	NA	0032+0024	0.00411473
2.56727	NA	0032+0024+Heparin	0.00344473
2.56727	NA	0032+Heparin	0.00211445
2.57569	NA	0030+0024	0.00109993
2.57569	NA	0030+0024+Heparin	0.00159197
2.57569	NA	0030+Heparin	0.00218262
2.57569	NA	0032+0024	0.00411111
2.57569	NA	0032+0024+Heparin	0.00344243
2.57569	NA	0032+Heparin	0.00211814
2.5841	NA	0030+0024	0.0011029
2.5841	NA	0030+0024+Heparin	0.00158788
2.5841	NA	0030+Heparin	0.00217514
2.5841	NA	0032+0024	0.00410827
2.5841	NA	0032+0024+Heparin	0.00343628
2.5841	NA	0032+Heparin	0.0021229
2.59252	NA	0030+0024	0.00110261
2.59252	NA	0030+0024+Heparin	0.00158381
2.59252	NA	0030+Heparin	0.00216841
2.59252	NA	0032+0024	0.00410469
2.59252	NA	0032+0024+Heparin	0.00342579
2.59252	NA	0032+Heparin	0.00212835
2.60094	NA	0030+0024	0.00109862
2.60094	NA	0030+0024+Heparin	0.00158004
2.60094	NA	0030+Heparin	0.00216251
2.60094	NA	0032+0024	0.0041001
2.60094	NA	0032+0024+Heparin	0.00341162
2.60094	NA	0032+Heparin	0.00213366
2.60936	NA	0030+0024	0.00109129
2.60936	NA	0030+0024+Heparin	0.00157654
2.60936	NA	0030+Heparin	0.00215686
2.60936	NA	0032+0024	0.00409533
2.60936	NA	0032+0024+Heparin	0.00339571
2.60936	NA	0032+Heparin	0.00213776
2.61777	NA	0030+0024	0.0010814
2.61777	NA	0030+0024+Heparin	0.00157269
2.61777	NA	0030+Heparin	0.00215001
2.61777	NA	0032+0024	0.00409131
2.61777	NA	0032+0024+Heparin	0.00338086
2.61777	NA	0032+Heparin	0.00213923
2.62619	NA	0030+0024	0.00106957
2.62619	NA	0030+0024+Heparin	0.00156746
2.62619	NA	0030+Heparin	0.00214092
2.62619	NA	0032+0024	0.00408839
2.62619	NA	0032+0024+Heparin	0.00336928
2.62619	NA	0032+Heparin	0.0021364
2.63461	NA	0030+0024	0.00105657
2.63461	NA	0030+0024+Heparin	0.00156013
2.63461	NA	0030+Heparin	0.00213078
2.63461	NA	0032+0024	0.0040866
2.63461	NA	0032+0024+Heparin	0.00336165
2.63461	NA	0032+Heparin	0.00212857
2.64303	NA	0030+0024	0.00104344
2.64303	NA	0030+0024+Heparin	0.00155102
2.64303	NA	0030+Heparin	0.00212266
2.64303	NA	0032+0024	0.00408573
2.64303	NA	0032+0024+Heparin	0.00335767
2.64303	NA	0032+Heparin	0.00211773
2.65144	NA	0030+0024	0.00103035
2.65144	NA	0030+0024+Heparin	0.00154179
2.65144	NA	0030+Heparin	0.00211911
2.65144	NA	0032+0024	0.00408512
2.65144	NA	0032+0024+Heparin	0.00335672
2.65144	NA	0032+Heparin	0.00210741
2.65986	NA	0030+0024	0.00101619
2.65986	NA	0030+0024+Heparin	0.0015343
2.65986	NA	0030+Heparin	0.00212041
2.65986	NA	0032+0024	0.00408403
2.65986	NA	0032+0024+Heparin	0.00335853
2.65986	NA	0032+Heparin	0.00209954
2.66828	NA	0030+0024	0.00100048
2.66828	NA	0030+0024+Heparin	0.00152922
2.66828	NA	0030+Heparin	0.00212487
2.66828	NA	0032+0024	0.00408239
2.66828	NA	0032+0024+Heparin	0.00336296
2.66828	NA	0032+Heparin	0.00209392
2.67669	NA	0030+0024	0.000984823
2.67669	NA	0030+0024+Heparin	0.00152622
2.67669	NA	0030+Heparin	0.00213024
2.67669	NA	0032+0024	0.00408071
2.67669	NA	0032+0024+Heparin	0.00336926
2.67669	NA	0032+Heparin	0.00209049
2.68511	NA	0030+0024	0.000971993
2.68511	NA	0030+0024+Heparin	0.00152481
2.68511	NA	0030+Heparin	0.00213492
2.68511	NA	0032+0024	0.00407978
2.68511	NA	0032+0024+Heparin	0.00337589
2.68511	NA	0032+Heparin	0.00209078
2.69353	NA	0030+0024	0.000963963
2.69353	NA	0030+0024+Heparin	0.0015245
2.69353	NA	0030+Heparin	0.00213843
2.69353	NA	0032+0024	0.00408053
[truncated: 19,460 more rows]

## Sheet: legend
0030+0024	0030:HD mAb + Gremlin-1
0030+0024+Heparin	0030:HD mAb + Gremlin-1 + Heparin
0030+Heparin	0030:HD mAb + Heparin
0032+0024	0032:ND mAb + Gremlin-1
0032+0024+Heparin	0032:ND mAb + Gremlin-1 + Heparin
0032+Heparin	0032:ND mAb + Heparin
