# Supplementary material for: Evaluation of Gremlin-1 as a therapeutic target in metabolic dysfunction-associated steatohepatitis
Source: eLife. 2024 Oct 3;13:RP95185. doi: 10.7554/eLife.95185 (PMC11449483; doi:10.7554/eLife.95185)
Supplement: Figure 3—source data 1. [file elife-95185-fig3-data1.xlsx]

## Sheet: Panel A (BMP inhibition assay)
mAb_conc (nM)	Ab	absorbance (AU)
6e-08	aG1-Ab-0030	0.062
4e-08	aG1-Ab-0030	0.071
2e-08	aG1-Ab-0030	0.093
1e-08	aG1-Ab-0030	0.114
6.66667e-09	aG1-Ab-0030	0.116
4.44444e-09	aG1-Ab-0030	0.17
2.22222e-09	aG1-Ab-0030	0.255
1.48148e-09	aG1-Ab-0030	0.323
9.87654e-10	aG1-Ab-0030	0.368
4.93827e-10	aG1-Ab-0030	0.384
3.29218e-10	aG1-Ab-0030	0.461
0	aG1-Ab-0030	0.41
6e-08	aG1-Ab-0030	0.065
4e-08	aG1-Ab-0030	0.071
2e-08	aG1-Ab-0030	0.101
1e-08	aG1-Ab-0030	0.093
6.66667e-09	aG1-Ab-0030	0.133
4.44444e-09	aG1-Ab-0030	0.173
2.22222e-09	aG1-Ab-0030	0.239
1.48148e-09	aG1-Ab-0030	0.328
9.87654e-10	aG1-Ab-0030	0.409
4.93827e-10	aG1-Ab-0030	0.39
3.29218e-10	aG1-Ab-0030	0.423
0	aG1-Ab-0030	0.442
6e-08	aG1-Ab-0032	0.041
4e-08	aG1-Ab-0032	0.043
2e-08	aG1-Ab-0032	0.049
1e-08	aG1-Ab-0032	0.056
6.66667e-09	aG1-Ab-0032	0.096
4.44444e-09	aG1-Ab-0032	0.165
2.22222e-09	aG1-Ab-0032	0.266
1.48148e-09	aG1-Ab-0032	0.341
9.87654e-10	aG1-Ab-0032	0.386
4.93827e-10	aG1-Ab-0032	0.352
3.29218e-10	aG1-Ab-0032	0.39
0	aG1-Ab-0032	0.382
6e-08	aG1-Ab-0032	0.038
4e-08	aG1-Ab-0032	0.041
2e-08	aG1-Ab-0032	0.046
1e-08	aG1-Ab-0032	0.059
6.66667e-09	aG1-Ab-0032	0.091
4.44444e-09	aG1-Ab-0032	0.161
2.22222e-09	aG1-Ab-0032	0.271
1.48148e-09	aG1-Ab-0032	0.328
9.87654e-10	aG1-Ab-0032	0.356
4.93827e-10	aG1-Ab-0032	0.408
3.29218e-10	aG1-Ab-0032	0.369
0	aG1-Ab-0032	0.379

## Sheet: Panel B (C2C12 BRE-Luc RGA)
mAb_conc (nM)	Ab	luminescence (counts/s)
1.33E-10	aG1-Ab-0030	1746.67
2.66E-10	aG1-Ab-0030	1693.33
5.32E-10	aG1-Ab-0030	1640
1.06E-09	aG1-Ab-0030	1706.67
2.13E-09	aG1-Ab-0030	1933.33
4.26E-09	aG1-Ab-0030	1826.67
8.51E-09	aG1-Ab-0030	2426.67
1.70E-08	aG1-Ab-0030	10120
3.40E-08	aG1-Ab-0030	14040
6.81E-08	aG1-Ab-0030	13920
1.36E-07	aG1-Ab-0030	14520
1.33E-10	aG1-Ab-0030	1506.67
2.66E-10	aG1-Ab-0030	1480
5.32E-10	aG1-Ab-0030	1440
1.06E-09	aG1-Ab-0030	1626.67
2.13E-09	aG1-Ab-0030	1706.67
4.26E-09	aG1-Ab-0030	1706.67
8.51E-09	aG1-Ab-0030	1600
1.70E-08	aG1-Ab-0030	10266.7
3.40E-08	aG1-Ab-0030	13693.3
6.81E-08	aG1-Ab-0030	12720
1.36E-07	aG1-Ab-0030	14880
1.33E-10	aG1-Ab-0030	1826.67
2.66E-10	aG1-Ab-0030	1453.33
5.32E-10	aG1-Ab-0030	1680
1.06E-09	aG1-Ab-0030	1680
2.13E-09	aG1-Ab-0030	1786.67
4.26E-09	aG1-Ab-0030	1960
8.51E-09	aG1-Ab-0030	2986.67
1.70E-08	aG1-Ab-0030	12506.7
3.40E-08	aG1-Ab-0030	13613.3
6.81E-08	aG1-Ab-0030	12240
1.36E-07	aG1-Ab-0030	13546.7
1.33E-10	aG1-Ab-0030	1480
2.66E-10	aG1-Ab-0030	1306.67
5.32E-10	aG1-Ab-0030	1746.67
1.06E-09	aG1-Ab-0030	1333.33
2.13E-09	aG1-Ab-0030	1613.33
4.26E-09	aG1-Ab-0030	1626.67
8.51E-09	aG1-Ab-0030	2453.33
1.70E-08	aG1-Ab-0030	11226.7
3.40E-08	aG1-Ab-0030	12506.7
6.81E-08	aG1-Ab-0030	13800
1.36E-07	aG1-Ab-0030	14653.3
1.33E-10	aG1-Ab-0030	1426.67
2.66E-10	aG1-Ab-0030	1600
5.32E-10	aG1-Ab-0030	1586.67
1.06E-09	aG1-Ab-0030	1760
2.13E-09	aG1-Ab-0030	1760
4.26E-09	aG1-Ab-0030	2066.67
8.51E-09	aG1-Ab-0030	2733.33
1.70E-08	aG1-Ab-0030	11613.3
3.40E-08	aG1-Ab-0030	12640
6.81E-08	aG1-Ab-0030	12933.3
1.36E-07	aG1-Ab-0030	13213.3
1.33E-10	aG1-Ab-0030	1440
2.66E-10	aG1-Ab-0030	1400
5.32E-10	aG1-Ab-0030	1423.67
1.06E-09	aG1-Ab-0030	1466.67
2.13E-09	aG1-Ab-0030	1560
4.26E-09	aG1-Ab-0030	1533.33
8.51E-09	aG1-Ab-0030	2840
1.70E-08	aG1-Ab-0030	11680
3.40E-08	aG1-Ab-0030	11840
6.81E-08	aG1-Ab-0030	12266.7
1.36E-07	aG1-Ab-0030	12066.7
2.47E-10	aG1-Ab-0032	1826.67
4.94E-10	aG1-Ab-0032	1706.67
9.88E-10	aG1-Ab-0032	1866.67
1.98E-09	aG1-Ab-0032	1786.67
3.95E-09	aG1-Ab-0032	2386.67
7.90E-09	aG1-Ab-0032	2533.33
1.58E-08	aG1-Ab-0032	10906.7
3.16E-08	aG1-Ab-0032	13026.7
6.32E-08	aG1-Ab-0032	13213.3
1.26E-07	aG1-Ab-0032	12920
2.53E-07	aG1-Ab-0032	13906.7
2.47E-10	aG1-Ab-0032	1293.33
4.94E-10	aG1-Ab-0032	1546.67
9.88E-10	aG1-Ab-0032	1586.67
1.98E-09	aG1-Ab-0032	1680
3.95E-09	aG1-Ab-0032	2226.67
7.90E-09	aG1-Ab-0032	3293.33
1.58E-08	aG1-Ab-0032	9613.33
3.16E-08	aG1-Ab-0032	13066.7
6.32E-08	aG1-Ab-0032	12173.3
1.26E-07	aG1-Ab-0032	13000
2.53E-07	aG1-Ab-0032	13986.7
2.47E-10	aG1-Ab-0032	1573.33
4.94E-10	aG1-Ab-0032	1520
9.88E-10	aG1-Ab-0032	1746.67
1.98E-09	aG1-Ab-0032	1760
3.95E-09	aG1-Ab-0032	2413.33
7.90E-09	aG1-Ab-0032	3520
1.58E-08	aG1-Ab-0032	8360
3.16E-08	aG1-Ab-0032	12213.3
6.32E-08	aG1-Ab-0032	13586.7
1.26E-07	aG1-Ab-0032	14346.7
2.53E-07	aG1-Ab-0032	13280
2.47E-10	aG1-Ab-0032	1400
4.94E-10	aG1-Ab-0032	1266.67
9.88E-10	aG1-Ab-0032	1520
1.98E-09	aG1-Ab-0032	1866.67
3.95E-09	aG1-Ab-0032	2186.67
7.90E-09	aG1-Ab-0032	4080
1.58E-08	aG1-Ab-0032	9306.67
3.16E-08	aG1-Ab-0032	10813.3
6.32E-08	aG1-Ab-0032	12866.7
1.26E-07	aG1-Ab-0032	14013.3
2.53E-07	aG1-Ab-0032	13520
2.47E-10	aG1-Ab-0032	1733.33
4.94E-10	aG1-Ab-0032	1720
9.88E-10	aG1-Ab-0032	1560
1.98E-09	aG1-Ab-0032	1853.33
3.95E-09	aG1-Ab-0032	1986.67
7.90E-09	aG1-Ab-0032	2626.67
1.58E-08	aG1-Ab-0032	7600
3.16E-08	aG1-Ab-0032	12600
6.32E-08	aG1-Ab-0032	13706.7
1.26E-07	aG1-Ab-0032	13013.3
2.53E-07	aG1-Ab-0032	12386.7
2.47E-10	aG1-Ab-0032	1466.67
4.94E-10	aG1-Ab-0032	1413.33
9.88E-10	aG1-Ab-0032	1533.33
1.98E-09	aG1-Ab-0032	1666.67
3.95E-09	aG1-Ab-0032	2013.33
7.90E-09	aG1-Ab-0032	2933.33
1.58E-08	aG1-Ab-0032	9040
3.16E-08	aG1-Ab-0032	12133.3
6.32E-08	aG1-Ab-0032	12533.3
1.26E-07	aG1-Ab-0032	13413.3
2.53E-07	aG1-Ab-0032	12706.7

## Sheet: Panel C (LX2 pSMAD1)
mAb_conc (nM)	Ab	pSMAD1 (AU)
300	aG1-Ab-0030	164604
100	aG1-Ab-0030	174399
33.3333	aG1-Ab-0030	184861
11.1111	aG1-Ab-0030	162859
3.7037	aG1-Ab-0030	56251
1.23457	aG1-Ab-0030	26218
0.411523	aG1-Ab-0030	19390
0.137174	aG1-Ab-0030	15009
300	aG1-Ab-0030	116788
100	aG1-Ab-0030	144022
33.3333	aG1-Ab-0030	136790
11.1111	aG1-Ab-0030	147410
3.7037	aG1-Ab-0030	52942
1.23457	aG1-Ab-0030	24732
0.411523	aG1-Ab-0030	20091
0.137174	aG1-Ab-0030	NA
300	Iso-Ab	15771
100	Iso-Ab	17227
33.3333	Iso-Ab	16478
11.1111	Iso-Ab	16174
3.7037	Iso-Ab	18479
1.23457	Iso-Ab	17585
0.411523	Iso-Ab	17200
0.137174	Iso-Ab	10368
300	Iso-Ab	16363
100	Iso-Ab	16559
33.3333	Iso-Ab	16542
11.1111	Iso-Ab	16857
3.7037	Iso-Ab	16951
1.23457	Iso-Ab	14732
0.411523	Iso-Ab	13869
0.137174	Iso-Ab	NA
300	aG1-Ab-0032	134489
100	aG1-Ab-0032	151533
33.3333	aG1-Ab-0032	152772
11.1111	aG1-Ab-0032	147632
3.7037	aG1-Ab-0032	109086
1.23457	aG1-Ab-0032	38712
0.411523	aG1-Ab-0032	20404
0.137174	aG1-Ab-0032	12083
300	aG1-Ab-0032	147847
100	aG1-Ab-0032	155306
33.3333	aG1-Ab-0032	156332
11.1111	aG1-Ab-0032	158813
3.7037	aG1-Ab-0032	103387
1.23457	aG1-Ab-0032	32993
0.411523	aG1-Ab-0032	17803
0.137174	aG1-Ab-0032	10081

## Sheet: Panel D (chromatography)
volume (mL)	mol_weight (kDa)	condition	UV
14.6728	182.985	0502-0000-0030-0024	NA
14.7149	182.686	0502-0000-0030-0024	NA
14.7569	182.309	0502-0000-0030-0024	NA
14.799	182.536	0502-0000-0030-0024	NA
14.8411	182.348	0502-0000-0030-0024	NA
14.8832	182.578	0502-0000-0030-0024	NA
14.9253	182.606	0502-0000-0030-0024	NA
14.9674	182.358	0502-0000-0030-0024	NA
15.0095	182.256	0502-0000-0030-0024	NA
15.0515	182.264	0502-0000-0030-0024	NA
15.0936	181.885	0502-0000-0030-0024	NA
15.1357	182.113	0502-0000-0030-0024	NA
15.1778	181.65	0502-0000-0030-0024	NA
15.5987	145.79	0502-0000-0030-0024	NA
15.6408	142.98	0502-0000-0030-0024	NA
15.6828	141.934	0502-0000-0030-0024	NA
15.7249	141.522	0502-0000-0030-0024	NA
15.767	141.197	0502-0000-0030-0024	NA
15.8091	141.025	0502-0000-0030-0024	NA
15.8512	140.07	0502-0000-0030-0024	NA
15.8933	140.24	0502-0000-0030-0024	NA
15.9354	139.819	0502-0000-0030-0024	NA
15.9774	141.158	0502-0000-0030-0024	NA
16.0195	140.54	0502-0000-0030-0024	NA
15.7014	143.986	0502-0000-0032-0024	NA
15.7434	143.318	0502-0000-0032-0024	NA
15.7855	141.562	0502-0000-0032-0024	NA
15.8276	142.102	0502-0000-0032-0024	NA
15.8697	141.462	0502-0000-0032-0024	NA
15.9118	141.936	0502-0000-0032-0024	NA
15.9539	142.283	0502-0000-0032-0024	NA
13.2839	351.941	0502-0000-0030-0024	NA
13.326	349.062	0502-0000-0030-0024	NA
13.3681	350.969	0502-0000-0030-0024	NA
13.4102	348.203	0502-0000-0030-0024	NA
13.4523	346.652	0502-0000-0030-0024	NA
13.4944	342.809	0502-0000-0030-0024	NA
13.5364	340.529	0502-0000-0030-0024	NA
13.5785	335.504	0502-0000-0030-0024	NA
13.6206	334.135	0502-0000-0030-0024	NA
13.6627	324.667	0502-0000-0030-0024	NA
13.7048	322.978	0502-0000-0030-0024	NA
13.7469	313.171	0502-0000-0030-0024	NA
13.789	307.095	0502-0000-0030-0024	NA
13.831	289.998	0502-0000-0030-0024	NA
13.8731	283.544	0502-0000-0030-0024	NA
13.9152	265.153	0502-0000-0030-0024	NA
13.4455	353.501	0502-0000-0032-0024	NA
13.4876	353.682	0502-0000-0032-0024	NA
13.5297	353.656	0502-0000-0032-0024	NA
13.5718	353.882	0502-0000-0032-0024	NA
13.6139	353.723	0502-0000-0032-0024	NA
13.656	353.928	0502-0000-0032-0024	NA
13.698	354.048	0502-0000-0032-0024	NA
0	NA	0502-0000-0030-0024	0.00129955
0	NA	0502-0000-0032-0024	0.00260692
0.00841728	NA	0502-0000-0030-0024	0.00142776
0.00841728	NA	0502-0000-0032-0024	0.00287228
0.0168346	NA	0502-0000-0030-0024	0.00154252
0.0168346	NA	0502-0000-0032-0024	0.00310669
0.0252518	NA	0502-0000-0030-0024	0.00164487
0.0252518	NA	0502-0000-0032-0024	0.00331334
0.0336691	NA	0502-0000-0030-0024	0.0017359
0.0336691	NA	0502-0000-0032-0024	0.00349419
0.0420864	NA	0502-0000-0030-0024	0.00181647
0.0420864	NA	0502-0000-0032-0024	0.00365418
0.0505037	NA	0502-0000-0030-0024	0.00188737
0.0505037	NA	0502-0000-0032-0024	0.00379522
0.0589209	NA	0502-0000-0030-0024	0.00195015
0.0589209	NA	0502-0000-0032-0024	0.00391932
0.0673382	NA	0502-0000-0030-0024	0.0020063
0.0673382	NA	0502-0000-0032-0024	0.00402748
0.0757555	NA	0502-0000-0030-0024	0.00205533
0.0757555	NA	0502-0000-0032-0024	0.00412018
0.0841728	NA	0502-0000-0030-0024	0.00209767
0.0841728	NA	0502-0000-0032-0024	0.00420114
0.09259	NA	0502-0000-0030-0024	0.00213201
0.09259	NA	0502-0000-0032-0024	0.00427573
0.101007	NA	0502-0000-0030-0024	0.0021587
0.101007	NA	0502-0000-0032-0024	0.00434307
0.109425	NA	0502-0000-0030-0024	0.00218266
0.109425	NA	0502-0000-0032-0024	0.00440357
0.117842	NA	0502-0000-0030-0024	0.00220631
0.117842	NA	0502-0000-0032-0024	0.00445614
0.126259	NA	0502-0000-0030-0024	0.00222905
0.126259	NA	0502-0000-0032-0024	0.00450147
0.134676	NA	0502-0000-0030-0024	0.00225017
0.134676	NA	0502-0000-0032-0024	0.00453955
0.143094	NA	0502-0000-0030-0024	0.00226957
0.143094	NA	0502-0000-0032-0024	0.00457205
0.151511	NA	0502-0000-0030-0024	0.00228829
0.151511	NA	0502-0000-0032-0024	0.00460138
0.159928	NA	0502-0000-0030-0024	0.00230686
0.159928	NA	0502-0000-0032-0024	0.00462899
0.168346	NA	0502-0000-0030-0024	0.00232314
0.168346	NA	0502-0000-0032-0024	0.00465544
0.176763	NA	0502-0000-0030-0024	0.00233674
0.176763	NA	0502-0000-0032-0024	0.00467883
0.18518	NA	0502-0000-0030-0024	0.00234711
0.18518	NA	0502-0000-0032-0024	0.00469911
0.193597	NA	0502-0000-0030-0024	0.00235572
0.193597	NA	0502-0000-0032-0024	0.00471619
0.202015	NA	0502-0000-0030-0024	0.00236541
0.202015	NA	0502-0000-0032-0024	0.00472834
0.210432	NA	0502-0000-0030-0024	0.00237519
0.210432	NA	0502-0000-0032-0024	0.00473566
0.218849	NA	0502-0000-0030-0024	0.00238478
0.218849	NA	0502-0000-0032-0024	0.0047381
0.227266	NA	0502-0000-0030-0024	0.00239363
0.227266	NA	0502-0000-0032-0024	0.00474246
0.235684	NA	0502-0000-0030-0024	0.00240165
0.235684	NA	0502-0000-0032-0024	0.0047464
0.244101	NA	0502-0000-0030-0024	0.00240892
0.244101	NA	0502-0000-0032-0024	0.00474931
0.252518	NA	0502-0000-0030-0024	0.0024149
0.252518	NA	0502-0000-0032-0024	0.00475142
0.260936	NA	0502-0000-0030-0024	0.00241925
0.260936	NA	0502-0000-0032-0024	0.00475333
0.269353	NA	0502-0000-0030-0024	0.00242183
0.269353	NA	0502-0000-0032-0024	0.00475475
0.27777	NA	0502-0000-0030-0024	0.00242162
0.27777	NA	0502-0000-0032-0024	0.00475641
0.286187	NA	0502-0000-0030-0024	0.00241921
0.286187	NA	0502-0000-0032-0024	0.00476083
0.294605	NA	0502-0000-0030-0024	0.00241844
0.294605	NA	0502-0000-0032-0024	0.00476461
0.303022	NA	0502-0000-0030-0024	0.00242035
0.303022	NA	0502-0000-0032-0024	0.00476734
0.311439	NA	0502-0000-0030-0024	0.00242254
0.311439	NA	0502-0000-0032-0024	0.00476872
0.319857	NA	0502-0000-0030-0024	0.002424
0.319857	NA	0502-0000-0032-0024	0.00476696
0.328274	NA	0502-0000-0030-0024	0.0024244
0.328274	NA	0502-0000-0032-0024	0.00476277
0.336691	NA	0502-0000-0030-0024	0.00242247
0.336691	NA	0502-0000-0032-0024	0.00475946
0.345108	NA	0502-0000-0030-0024	0.00241921
0.345108	NA	0502-0000-0032-0024	0.00475602
0.353526	NA	0502-0000-0030-0024	0.00241718
0.353526	NA	0502-0000-0032-0024	0.00475111
0.361943	NA	0502-0000-0030-0024	0.0024154
0.361943	NA	0502-0000-0032-0024	0.00474541
0.37036	NA	0502-0000-0030-0024	0.00241361
0.37036	NA	0502-0000-0032-0024	0.0047411
0.378777	NA	0502-0000-0030-0024	0.0024119
0.378777	NA	0502-0000-0032-0024	0.00473692
0.387195	NA	0502-0000-0030-0024	0.0024104
0.387195	NA	0502-0000-0032-0024	0.00473268
0.395612	NA	0502-0000-0030-0024	0.00240922
0.395612	NA	0502-0000-0032-0024	0.00472817
0.404029	NA	0502-0000-0030-0024	0.00240824
0.404029	NA	0502-0000-0032-0024	0.00472269
0.412447	NA	0502-0000-0030-0024	0.0024071
0.412447	NA	0502-0000-0032-0024	0.00471749
0.420864	NA	0502-0000-0030-0024	0.00240586
0.420864	NA	0502-0000-0032-0024	0.0047122
0.429281	NA	0502-0000-0030-0024	0.00240442
0.429281	NA	0502-0000-0032-0024	0.0047069
0.437698	NA	0502-0000-0030-0024	0.00240252
0.437698	NA	0502-0000-0032-0024	0.0047023
0.446116	NA	0502-0000-0030-0024	0.00239945
0.446116	NA	0502-0000-0032-0024	0.00470016
0.454533	NA	0502-0000-0030-0024	0.00239474
0.454533	NA	0502-0000-0032-0024	0.00469857
0.46295	NA	0502-0000-0030-0024	0.0023903
0.46295	NA	0502-0000-0032-0024	0.00469719
0.471367	NA	0502-0000-0030-0024	0.00238741
0.471367	NA	0502-0000-0032-0024	0.00469475
0.479785	NA	0502-0000-0030-0024	0.00238507
0.479785	NA	0502-0000-0032-0024	0.00469119
0.488202	NA	0502-0000-0030-0024	0.00238274
0.488202	NA	0502-0000-0032-0024	0.00468648
0.496619	NA	0502-0000-0030-0024	0.0023804
0.496619	NA	0502-0000-0032-0024	0.00468287
0.505037	NA	0502-0000-0030-0024	0.00237796
0.505037	NA	0502-0000-0032-0024	0.00467921
0.513454	NA	0502-0000-0030-0024	0.00237554
0.513454	NA	0502-0000-0032-0024	0.00467285
0.521871	NA	0502-0000-0030-0024	0.00237413
0.521871	NA	0502-0000-0032-0024	0.0046645
0.530288	NA	0502-0000-0030-0024	0.0023743
0.530288	NA	0502-0000-0032-0024	0.00465738
0.538706	NA	0502-0000-0030-0024	0.0023746
0.538706	NA	0502-0000-0032-0024	0.00465584
0.547123	NA	0502-0000-0030-0024	0.00237463
0.547123	NA	0502-0000-0032-0024	0.00465718
0.55554	NA	0502-0000-0030-0024	0.00237388
0.55554	NA	0502-0000-0032-0024	0.00465786
0.563958	NA	0502-0000-0030-0024	0.00237311
0.563958	NA	0502-0000-0032-0024	0.0046579
0.572375	NA	0502-0000-0030-0024	0.00237421
0.572375	NA	0502-0000-0032-0024	0.00465711
0.580792	NA	0502-0000-0030-0024	0.00237547
0.580792	NA	0502-0000-0032-0024	0.00465563
0.589209	NA	0502-0000-0030-0024	0.00237488
0.589209	NA	0502-0000-0032-0024	0.00465312
0.597627	NA	0502-0000-0030-0024	0.00237176
0.597627	NA	0502-0000-0032-0024	0.00464862
0.606044	NA	0502-0000-0030-0024	0.00236538
0.606044	NA	0502-0000-0032-0024	0.00464624
0.614461	NA	0502-0000-0030-0024	0.00235968
0.614461	NA	0502-0000-0032-0024	0.00464432
0.622878	NA	0502-0000-0030-0024	0.00235781
0.622878	NA	0502-0000-0032-0024	0.00464242
0.631296	NA	0502-0000-0030-0024	0.00235648
0.631296	NA	0502-0000-0032-0024	0.00464087
0.639713	NA	0502-0000-0030-0024	0.00235534
0.639713	NA	0502-0000-0032-0024	0.00464067
0.64813	NA	0502-0000-0030-0024	0.0023543
0.64813	NA	0502-0000-0032-0024	0.00463901
0.656548	NA	0502-0000-0030-0024	0.00235308
0.656548	NA	0502-0000-0032-0024	0.00463583
0.664965	NA	0502-0000-0030-0024	0.00235145
0.664965	NA	0502-0000-0032-0024	0.00463005
0.673382	NA	0502-0000-0030-0024	0.00234942
0.673382	NA	0502-0000-0032-0024	0.00462157
0.681799	NA	0502-0000-0030-0024	0.002347
0.681799	NA	0502-0000-0032-0024	0.0046133
0.690217	NA	0502-0000-0030-0024	0.00234402
0.690217	NA	0502-0000-0032-0024	0.00460661
0.698634	NA	0502-0000-0030-0024	0.00233901
0.698634	NA	0502-0000-0032-0024	0.00460078
0.707051	NA	0502-0000-0030-0024	0.00233319
0.707051	NA	0502-0000-0032-0024	0.00459593
0.715469	NA	0502-0000-0030-0024	0.00233173
0.715469	NA	0502-0000-0032-0024	0.00459301
0.723886	NA	0502-0000-0030-0024	0.00233356
0.723886	NA	0502-0000-0032-0024	0.00459186
0.732303	NA	0502-0000-0030-0024	0.00233492
0.732303	NA	0502-0000-0032-0024	0.00459227
0.74072	NA	0502-0000-0030-0024	0.00233541
0.74072	NA	0502-0000-0032-0024	0.00459475
0.749138	NA	0502-0000-0030-0024	0.00233392
0.749138	NA	0502-0000-0032-0024	0.00459572
0.757555	NA	0502-0000-0030-0024	0.0023311
0.757555	NA	0502-0000-0032-0024	0.00459503
0.765972	NA	0502-0000-0030-0024	0.00232962
0.765972	NA	0502-0000-0032-0024	0.00459101
0.774389	NA	0502-0000-0030-0024	0.00232846
0.774389	NA	0502-0000-0032-0024	0.00458308
0.782807	NA	0502-0000-0030-0024	0.00232696
0.782807	NA	0502-0000-0032-0024	0.0045763
0.791224	NA	0502-0000-0030-0024	0.00232467
0.791224	NA	0502-0000-0032-0024	0.00457363
0.799641	NA	0502-0000-0030-0024	0.00232136
0.799641	NA	0502-0000-0032-0024	0.00457203
0.808059	NA	0502-0000-0030-0024	0.00231716
0.808059	NA	0502-0000-0032-0024	0.00457007
0.816476	NA	0502-0000-0030-0024	0.0023132
0.816476	NA	0502-0000-0032-0024	0.00456678
0.824893	NA	0502-0000-0030-0024	0.00230989
0.824893	NA	0502-0000-0032-0024	0.00456267
0.83331	NA	0502-0000-0030-0024	0.00230675
0.83331	NA	0502-0000-0032-0024	0.0045595
0.841728	NA	0502-0000-0030-0024	0.00230356
0.841728	NA	0502-0000-0032-0024	0.00455696
0.850145	NA	0502-0000-0030-0024	0.0022986
0.850145	NA	0502-0000-0032-0024	0.00455441
0.858562	NA	0502-0000-0030-0024	0.00229166
0.858562	NA	0502-0000-0032-0024	0.00455176
0.866979	NA	0502-0000-0030-0024	0.00228594
0.866979	NA	0502-0000-0032-0024	0.00454863
0.875397	NA	0502-0000-0030-0024	0.00228207
0.875397	NA	0502-0000-0032-0024	0.00454494
0.883814	NA	0502-0000-0030-0024	0.00228011
0.883814	NA	0502-0000-0032-0024	0.00453951
0.892231	NA	0502-0000-0030-0024	0.00227863
0.892231	NA	0502-0000-0032-0024	0.00453071
0.900649	NA	0502-0000-0030-0024	0.00227708
0.900649	NA	0502-0000-0032-0024	0.00452386
0.909066	NA	0502-0000-0030-0024	0.0022751
0.909066	NA	0502-0000-0032-0024	0.00451776
0.917483	NA	0502-0000-0030-0024	0.00227023
0.917483	NA	0502-0000-0032-0024	0.00451241
0.9259	NA	0502-0000-0030-0024	0.00226251
0.9259	NA	0502-0000-0032-0024	0.00450823
0.934318	NA	0502-0000-0030-0024	0.00225614
0.934318	NA	0502-0000-0032-0024	0.00450526
0.942735	NA	0502-0000-0030-0024	0.00225095
0.942735	NA	0502-0000-0032-0024	0.0045027
0.951152	NA	0502-0000-0030-0024	0.00224664
0.951152	NA	0502-0000-0032-0024	0.0045001
0.95957	NA	0502-0000-0030-0024	0.00224309
0.95957	NA	0502-0000-0032-0024	0.00449669
0.967987	NA	0502-0000-0030-0024	0.00223974
0.967987	NA	0502-0000-0032-0024	0.00449262
0.976404	NA	0502-0000-0030-0024	0.0022365
0.976404	NA	0502-0000-0032-0024	0.0044885
0.984821	NA	0502-0000-0030-0024	0.00223331
0.984821	NA	0502-0000-0032-0024	0.00448519
0.993239	NA	0502-0000-0030-0024	0.00223008
0.993239	NA	0502-0000-0032-0024	0.00448136
1.00166	NA	0502-0000-0030-0024	0.00222635
1.00166	NA	0502-0000-0032-0024	0.00447697
1.01007	NA	0502-0000-0030-0024	0.00222189
1.01007	NA	0502-0000-0032-0024	0.00447181
1.01849	NA	0502-0000-0030-0024	0.00221729
1.01849	NA	0502-0000-0032-0024	0.00446719
1.02691	NA	0502-0000-0030-0024	0.00221399
1.02691	NA	0502-0000-0032-0024	0.00446564
1.03533	NA	0502-0000-0030-0024	0.00221285
1.03533	NA	0502-0000-0032-0024	0.00446486
1.04374	NA	0502-0000-0030-0024	0.00221198
1.04374	NA	0502-0000-0032-0024	0.00446351
1.05216	NA	0502-0000-0030-0024	0.00221092
1.05216	NA	0502-0000-0032-0024	0.00446159
1.06058	NA	0502-0000-0030-0024	0.0022092
1.06058	NA	0502-0000-0032-0024	0.00445842
1.06899	NA	0502-0000-0030-0024	0.00220665
1.06899	NA	0502-0000-0032-0024	0.00445305
1.07741	NA	0502-0000-0030-0024	0.00220431
1.07741	NA	0502-0000-0032-0024	0.00444969
1.08583	NA	0502-0000-0030-0024	0.00220354
1.08583	NA	0502-0000-0032-0024	0.00444679
1.09425	NA	0502-0000-0030-0024	0.00220298
1.09425	NA	0502-0000-0032-0024	0.00444359
1.10266	NA	0502-0000-0030-0024	0.00220168
1.10266	NA	0502-0000-0032-0024	0.00443876
1.11108	NA	0502-0000-0030-0024	0.00219942
1.11108	NA	0502-0000-0032-0024	0.00443318
1.1195	NA	0502-0000-0030-0024	0.00219452
1.1195	NA	0502-0000-0032-0024	0.00442991
1.12792	NA	0502-0000-0030-0024	0.00218687
1.12792	NA	0502-0000-0032-0024	0.00442721
1.13633	NA	0502-0000-0030-0024	0.00218106
1.13633	NA	0502-0000-0032-0024	0.00442438
1.14475	NA	0502-0000-0030-0024	0.00217856
1.14475	NA	0502-0000-0032-0024	0.0044206
1.15317	NA	0502-0000-0030-0024	0.00217725
1.15317	NA	0502-0000-0032-0024	0.00441561
1.16158	NA	0502-0000-0030-0024	0.00217676
1.16158	NA	0502-0000-0032-0024	0.00440828
1.17	NA	0502-0000-0030-0024	0.00217643
1.17	NA	0502-0000-0032-0024	0.00440075
1.17842	NA	0502-0000-0030-0024	0.00217574
1.17842	NA	0502-0000-0032-0024	0.00439338
1.18684	NA	0502-0000-0030-0024	0.00217483
1.18684	NA	0502-0000-0032-0024	0.00438723
1.19525	NA	0502-0000-0030-0024	0.00217466
1.19525	NA	0502-0000-0032-0024	0.00438232
1.20367	NA	0502-0000-0030-0024	0.00217631
1.20367	NA	0502-0000-0032-0024	0.00437809
1.21209	NA	0502-0000-0030-0024	0.00217839
1.21209	NA	0502-0000-0032-0024	0.00437255
1.22051	NA	0502-0000-0030-0024	0.00217907
1.22051	NA	0502-0000-0032-0024	0.00436554
1.22892	NA	0502-0000-0030-0024	0.00217779
1.22892	NA	0502-0000-0032-0024	0.00435648
1.23734	NA	0502-0000-0030-0024	0.00217487
1.23734	NA	0502-0000-0032-0024	0.00434925
1.24576	NA	0502-0000-0030-0024	0.00217219
1.24576	NA	0502-0000-0032-0024	0.00434506
1.25417	NA	0502-0000-0030-0024	0.00216981
1.25417	NA	0502-0000-0032-0024	0.00434136
1.26259	NA	0502-0000-0030-0024	0.00216711
1.26259	NA	0502-0000-0032-0024	0.0043377
1.27101	NA	0502-0000-0030-0024	0.00216377
1.27101	NA	0502-0000-0032-0024	0.00433386
1.27943	NA	0502-0000-0030-0024	0.00215857
1.27943	NA	0502-0000-0032-0024	0.00432984
1.28784	NA	0502-0000-0030-0024	0.00215364
1.28784	NA	0502-0000-0032-0024	0.00432542
1.29626	NA	0502-0000-0030-0024	0.00215169
1.29626	NA	0502-0000-0032-0024	0.00432112
1.30468	NA	0502-0000-0030-0024	0.0021502
1.30468	NA	0502-0000-0032-0024	0.00431936
1.3131	NA	0502-0000-0030-0024	0.00214924
1.3131	NA	0502-0000-0032-0024	0.00431808
1.32151	NA	0502-0000-0030-0024	0.00214802
1.32151	NA	0502-0000-0032-0024	0.00431689
1.32993	NA	0502-0000-0030-0024	0.0021461
1.32993	NA	0502-0000-0032-0024	0.0043154
1.33835	NA	0502-0000-0030-0024	0.00214346
1.33835	NA	0502-0000-0032-0024	0.00431278
1.34676	NA	0502-0000-0030-0024	0.00214046
1.34676	NA	0502-0000-0032-0024	0.00431005
1.35518	NA	0502-0000-0030-0024	0.0021376
1.35518	NA	0502-0000-0032-0024	0.00431085
1.3636	NA	0502-0000-0030-0024	0.00213473
1.3636	NA	0502-0000-0032-0024	0.00431166
1.37202	NA	0502-0000-0030-0024	0.00213314
1.37202	NA	0502-0000-0032-0024	0.00431132
1.38043	NA	0502-0000-0030-0024	0.00213383
1.38043	NA	0502-0000-0032-0024	0.0043098
1.38885	NA	0502-0000-0030-0024	0.00213525
1.38885	NA	0502-0000-0032-0024	0.0043069
1.39727	NA	0502-0000-0030-0024	0.00213683
1.39727	NA	0502-0000-0032-0024	0.00430438
1.40569	NA	0502-0000-0030-0024	0.00213854
1.40569	NA	0502-0000-0032-0024	0.00430216
1.4141	NA	0502-0000-0030-0024	0.00214049
1.4141	NA	0502-0000-0032-0024	0.00429967
1.42252	NA	0502-0000-0030-0024	0.00214284
1.42252	NA	0502-0000-0032-0024	0.00429648
1.43094	NA	0502-0000-0030-0024	0.00214541
1.43094	NA	0502-0000-0032-0024	0.00429116
1.43935	NA	0502-0000-0030-0024	0.00214767
1.43935	NA	0502-0000-0032-0024	0.00428706
1.44777	NA	0502-0000-0030-0024	0.00214932
1.44777	NA	0502-0000-0032-0024	0.00428372
1.45619	NA	0502-0000-0030-0024	0.00215017
1.45619	NA	0502-0000-0032-0024	0.0042803
1.46461	NA	0502-0000-0030-0024	0.00214991
1.46461	NA	0502-0000-0032-0024	0.00427637
1.47302	NA	0502-0000-0030-0024	0.00214895
1.47302	NA	0502-0000-0032-0024	0.00427238
1.48144	NA	0502-0000-0030-0024	0.0021473
1.48144	NA	0502-0000-0032-0024	0.00426997
1.48986	NA	0502-0000-0030-0024	0.00214431
1.48986	NA	0502-0000-0032-0024	0.00426751
1.49828	NA	0502-0000-0030-0024	0.00214058
1.49828	NA	0502-0000-0032-0024	0.00426487
1.50669	NA	0502-0000-0030-0024	0.00213757
1.50669	NA	0502-0000-0032-0024	0.00426186
1.51511	NA	0502-0000-0030-0024	0.00213574
1.51511	NA	0502-0000-0032-0024	0.00425887
1.52353	NA	0502-0000-0030-0024	0.00213399
1.52353	NA	0502-0000-0032-0024	0.00425728
1.53194	NA	0502-0000-0030-0024	0.00213192
1.53194	NA	0502-0000-0032-0024	0.00425576
1.54036	NA	0502-0000-0030-0024	0.00213022
1.54036	NA	0502-0000-0032-0024	0.00425202
1.54878	NA	0502-0000-0030-0024	0.0021293
1.54878	NA	0502-0000-0032-0024	0.00424634
1.5572	NA	0502-0000-0030-0024	0.00212818
1.5572	NA	0502-0000-0032-0024	0.00423964
1.56561	NA	0502-0000-0030-0024	0.00212666
1.56561	NA	0502-0000-0032-0024	0.00423436
1.57403	NA	0502-0000-0030-0024	0.00212442
1.57403	NA	0502-0000-0032-0024	0.00423059
1.58245	NA	0502-0000-0030-0024	0.00212082
1.58245	NA	0502-0000-0032-0024	0.00422896
1.59087	NA	0502-0000-0030-0024	0.00211612
1.59087	NA	0502-0000-0032-0024	0.00422721
1.59928	NA	0502-0000-0030-0024	0.00211154
1.59928	NA	0502-0000-0032-0024	0.00422514
1.6077	NA	0502-0000-0030-0024	0.00210727
1.6077	NA	0502-0000-0032-0024	0.00422281
1.61612	NA	0502-0000-0030-0024	0.00210262
1.61612	NA	0502-0000-0032-0024	0.0042203
1.62453	NA	0502-0000-0030-0024	0.00209776
1.62453	NA	0502-0000-0032-0024	0.00421735
1.63295	NA	0502-0000-0030-0024	0.00209314
1.63295	NA	0502-0000-0032-0024	0.00421381
1.64137	NA	0502-0000-0030-0024	0.00208889
1.64137	NA	0502-0000-0032-0024	0.00420773
1.64979	NA	0502-0000-0030-0024	0.00208493
1.64979	NA	0502-0000-0032-0024	0.00419441
1.6582	NA	0502-0000-0030-0024	0.00208158
1.6582	NA	0502-0000-0032-0024	0.00417933
1.66662	NA	0502-0000-0030-0024	0.00207895
1.66662	NA	0502-0000-0032-0024	0.00417269
1.67504	NA	0502-0000-0030-0024	0.00207636
1.67504	NA	0502-0000-0032-0024	0.00416761
1.68346	NA	0502-0000-0030-0024	0.00207367
1.68346	NA	0502-0000-0032-0024	0.00416285
1.69187	NA	0502-0000-0030-0024	0.00207089
1.69187	NA	0502-0000-0032-0024	0.00415825
1.70029	NA	0502-0000-0030-0024	0.00206805
1.70029	NA	0502-0000-0032-0024	0.00415365
1.70871	NA	0502-0000-0030-0024	0.00206428
1.70871	NA	0502-0000-0032-0024	0.00414909
1.71712	NA	0502-0000-0030-0024	0.00206037
1.71712	NA	0502-0000-0032-0024	0.00414458
1.72554	NA	0502-0000-0030-0024	0.00205891
1.72554	NA	0502-0000-0032-0024	0.00413955
1.73396	NA	0502-0000-0030-0024	0.00205867
1.73396	NA	0502-0000-0032-0024	0.00413465
1.74238	NA	0502-0000-0030-0024	0.00205853
1.74238	NA	0502-0000-0032-0024	0.00413197
1.75079	NA	0502-0000-0030-0024	0.00205809
1.75079	NA	0502-0000-0032-0024	0.00412876
1.75921	NA	0502-0000-0030-0024	0.00205686
1.75921	NA	0502-0000-0032-0024	0.00412497
1.76763	NA	0502-0000-0030-0024	0.00205451
1.76763	NA	0502-0000-0032-0024	0.00411969
1.77605	NA	0502-0000-0030-0024	0.00205173
1.77605	NA	0502-0000-0032-0024	0.00411135
1.78446	NA	0502-0000-0030-0024	0.00205005
1.78446	NA	0502-0000-0032-0024	0.0041036
1.79288	NA	0502-0000-0030-0024	0.00204901
1.79288	NA	0502-0000-0032-0024	0.00409744
1.8013	NA	0502-0000-0030-0024	0.00204684
1.8013	NA	0502-0000-0032-0024	0.00409212
1.80971	NA	0502-0000-0030-0024	0.00204171
1.80971	NA	0502-0000-0032-0024	0.00408726
1.81813	NA	0502-0000-0030-0024	0.00203493
1.81813	NA	0502-0000-0032-0024	0.00408198
1.82655	NA	0502-0000-0030-0024	0.00203051
1.82655	NA	0502-0000-0032-0024	0.0040769
1.83497	NA	0502-0000-0030-0024	0.00202978
1.83497	NA	0502-0000-0032-0024	0.00407424
1.84338	NA	0502-0000-0030-0024	0.00202987
1.84338	NA	0502-0000-0032-0024	0.00407162
1.8518	NA	0502-0000-0030-0024	0.00203102
1.8518	NA	0502-0000-0032-0024	0.00406884
1.86022	NA	0502-0000-0030-0024	0.00203309
1.86022	NA	0502-0000-0032-0024	0.00406567
1.86864	NA	0502-0000-0030-0024	0.0020349
1.86864	NA	0502-0000-0032-0024	0.00406103
1.87705	NA	0502-0000-0030-0024	0.00203578
1.87705	NA	0502-0000-0032-0024	0.00405468
1.88547	NA	0502-0000-0030-0024	0.00203563
1.88547	NA	0502-0000-0032-0024	0.00404697
1.89389	NA	0502-0000-0030-0024	0.00203469
1.89389	NA	0502-0000-0032-0024	0.00403929
1.9023	NA	0502-0000-0030-0024	0.00203343
1.9023	NA	0502-0000-0032-0024	0.00403266
1.91072	NA	0502-0000-0030-0024	0.00203161
1.91072	NA	0502-0000-0032-0024	0.00402662
1.91914	NA	0502-0000-0030-0024	0.00202923
1.91914	NA	0502-0000-0032-0024	0.00401987
1.92756	NA	0502-0000-0030-0024	0.00202625
1.92756	NA	0502-0000-0032-0024	0.00401239
1.93597	NA	0502-0000-0030-0024	0.0020224
1.93597	NA	0502-0000-0032-0024	0.00400466
1.94439	NA	0502-0000-0030-0024	0.00201638
1.94439	NA	0502-0000-0032-0024	0.00399948
1.95281	NA	0502-0000-0030-0024	0.00200828
1.95281	NA	0502-0000-0032-0024	0.00399372
1.96123	NA	0502-0000-0030-0024	0.00200073
1.96123	NA	0502-0000-0032-0024	0.00398727
1.96964	NA	0502-0000-0030-0024	0.00199464
1.96964	NA	0502-0000-0032-0024	0.00397999
1.97806	NA	0502-0000-0030-0024	0.00199108
1.97806	NA	0502-0000-0032-0024	0.00397455
1.98648	NA	0502-0000-0030-0024	0.00198991
1.98648	NA	0502-0000-0032-0024	0.00396974
1.99489	NA	0502-0000-0030-0024	0.00198864
1.99489	NA	0502-0000-0032-0024	0.00396494
2.00331	NA	0502-0000-0030-0024	0.00198673
2.00331	NA	0502-0000-0032-0024	0.00395945
2.01173	NA	0502-0000-0030-0024	0.00198449
2.01173	NA	0502-0000-0032-0024	0.00395365
2.02015	NA	0502-0000-0030-0024	0.00198287
2.02015	NA	0502-0000-0032-0024	0.00394879
2.02856	NA	0502-0000-0030-0024	0.0019808
2.02856	NA	0502-0000-0032-0024	0.00394382
2.03698	NA	0502-0000-0030-0024	0.00197745
2.03698	NA	0502-0000-0032-0024	0.00393879
2.0454	NA	0502-0000-0030-0024	0.00197306
2.0454	NA	0502-0000-0032-0024	0.003934
2.05382	NA	0502-0000-0030-0024	0.00196884
2.05382	NA	0502-0000-0032-0024	0.00393012
2.06223	NA	0502-0000-0030-0024	0.00196857
2.06223	NA	0502-0000-0032-0024	0.00392629
2.07065	NA	0502-0000-0030-0024	0.00197266
2.07065	NA	0502-0000-0032-0024	0.00392237
2.07907	NA	0502-0000-0030-0024	0.00197628
2.07907	NA	0502-0000-0032-0024	0.00391965
2.08748	NA	0502-0000-0030-0024	0.00197901
2.08748	NA	0502-0000-0032-0024	0.00392263
2.0959	NA	0502-0000-0030-0024	0.00198078
2.0959	NA	0502-0000-0032-0024	0.00392451
2.10432	NA	0502-0000-0030-0024	0.00198134
2.10432	NA	0502-0000-0032-0024	0.00392523
2.11274	NA	0502-0000-0030-0024	0.00198056
2.11274	NA	0502-0000-0032-0024	0.00392446
2.12115	NA	0502-0000-0030-0024	0.00197861
2.12115	NA	0502-0000-0032-0024	0.00392406
2.12957	NA	0502-0000-0030-0024	0.00197553
2.12957	NA	0502-0000-0032-0024	0.00392348
2.13799	NA	0502-0000-0030-0024	0.00197114
2.13799	NA	0502-0000-0032-0024	0.00392271
2.14641	NA	0502-0000-0030-0024	0.00196466
2.14641	NA	0502-0000-0032-0024	0.00392151
2.15482	NA	0502-0000-0030-0024	0.00195829
2.15482	NA	0502-0000-0032-0024	0.00391941
2.16324	NA	0502-0000-0030-0024	0.00195618
2.16324	NA	0502-0000-0032-0024	0.00391622
2.17166	NA	0502-0000-0030-0024	0.00195595
2.17166	NA	0502-0000-0032-0024	0.00391128
2.18007	NA	0502-0000-0030-0024	0.00195551
2.18007	NA	0502-0000-0032-0024	0.00390763
2.18849	NA	0502-0000-0030-0024	0.00195468
2.18849	NA	0502-0000-0032-0024	0.00390411
2.19691	NA	0502-0000-0030-0024	0.00195269
2.19691	NA	0502-0000-0032-0024	0.00390118
2.20533	NA	0502-0000-0030-0024	0.0019487
2.20533	NA	0502-0000-0032-0024	0.00389954
2.21374	NA	0502-0000-0030-0024	0.00194363
2.21374	NA	0502-0000-0032-0024	0.00389911
2.22216	NA	0502-0000-0030-0024	0.00193881
2.22216	NA	0502-0000-0032-0024	0.00389819
2.23058	NA	0502-0000-0030-0024	0.00193397
2.23058	NA	0502-0000-0032-0024	0.00389676
2.239	NA	0502-0000-0030-0024	0.00192873
2.239	NA	0502-0000-0032-0024	0.00389447
2.24741	NA	0502-0000-0030-0024	0.00192263
2.24741	NA	0502-0000-0032-0024	0.00389166
2.25583	NA	0502-0000-0030-0024	0.00191626
2.25583	NA	0502-0000-0032-0024	0.00389011
2.26425	NA	0502-0000-0030-0024	0.0019122
2.26425	NA	0502-0000-0032-0024	0.00389124
2.27266	NA	0502-0000-0030-0024	0.00191185
2.27266	NA	0502-0000-0032-0024	0.00389244
2.28108	NA	0502-0000-0030-0024	0.0019135
2.28108	NA	0502-0000-0032-0024	0.00389304
2.2895	NA	0502-0000-0030-0024	0.00191407
2.2895	NA	0502-0000-0032-0024	0.00389215
2.29792	NA	0502-0000-0030-0024	0.0019131
2.29792	NA	0502-0000-0032-0024	0.0038897
2.30633	NA	0502-0000-0030-0024	0.0019091
2.30633	NA	0502-0000-0032-0024	0.00388525
2.31475	NA	0502-0000-0030-0024	0.00190298
2.31475	NA	0502-0000-0032-0024	0.0038809
2.32317	NA	0502-0000-0030-0024	0.00189809
2.32317	NA	0502-0000-0032-0024	0.00387674
2.33159	NA	0502-0000-0030-0024	0.00189534
2.33159	NA	0502-0000-0032-0024	0.00387305
2.34	NA	0502-0000-0030-0024	0.00189494
2.34	NA	0502-0000-0032-0024	0.00386924
2.34842	NA	0502-0000-0030-0024	0.0018952
2.34842	NA	0502-0000-0032-0024	0.00386417
2.35684	NA	0502-0000-0030-0024	0.00189543
2.35684	NA	0502-0000-0032-0024	0.00385859
2.36525	NA	0502-0000-0030-0024	0.00189532
2.36525	NA	0502-0000-0032-0024	0.00385508
2.37367	NA	0502-0000-0030-0024	0.00189471
2.37367	NA	0502-0000-0032-0024	0.00385196
2.38209	NA	0502-0000-0030-0024	0.00189452
2.38209	NA	0502-0000-0032-0024	0.0038489
2.39051	NA	0502-0000-0030-0024	0.00189544
2.39051	NA	0502-0000-0032-0024	0.00384625
2.39892	NA	0502-0000-0030-0024	0.00189608
2.39892	NA	0502-0000-0032-0024	0.00384515
2.40734	NA	0502-0000-0030-0024	0.00189629
2.40734	NA	0502-0000-0032-0024	0.00384387
2.41576	NA	0502-0000-0030-0024	0.00189609
2.41576	NA	0502-0000-0032-0024	0.00384217
2.42418	NA	0502-0000-0030-0024	0.00189566
2.42418	NA	0502-0000-0032-0024	0.00383922
2.43259	NA	0502-0000-0030-0024	0.00189477
2.43259	NA	0502-0000-0032-0024	0.00383178
2.44101	NA	0502-0000-0030-0024	0.00189315
2.44101	NA	0502-0000-0032-0024	0.00382454
2.44943	NA	0502-0000-0030-0024	0.00189101
2.44943	NA	0502-0000-0032-0024	0.00381889
2.45784	NA	0502-0000-0030-0024	0.0018896
2.45784	NA	0502-0000-0032-0024	0.00381364
2.46626	NA	0502-0000-0030-0024	0.0018896
2.46626	NA	0502-0000-0032-0024	0.00380829
2.47468	NA	0502-0000-0030-0024	0.00188948
2.47468	NA	0502-0000-0032-0024	0.0038028
2.4831	NA	0502-0000-0030-0024	0.00188961
2.4831	NA	0502-0000-0032-0024	0.00379688
2.49151	NA	0502-0000-0030-0024	0.00189016
2.49151	NA	0502-0000-0032-0024	0.00379043
2.49993	NA	0502-0000-0030-0024	0.00189029
2.49993	NA	0502-0000-0032-0024	0.00378332
2.50835	NA	0502-0000-0030-0024	0.0018898
2.50835	NA	0502-0000-0032-0024	0.00377842
2.51677	NA	0502-0000-0030-0024	0.00188843
2.51677	NA	0502-0000-0032-0024	0.00377448
2.52518	NA	0502-0000-0030-0024	0.00188597
2.52518	NA	0502-0000-0032-0024	0.00377081
2.5336	NA	0502-0000-0030-0024	0.00188266
2.5336	NA	0502-0000-0032-0024	0.0037676
2.54202	NA	0502-0000-0030-0024	0.00187874
2.54202	NA	0502-0000-0032-0024	0.00376571
2.55043	NA	0502-0000-0030-0024	0.00187528
2.55043	NA	0502-0000-0032-0024	0.00376404
2.55885	NA	0502-0000-0030-0024	0.00187286
2.55885	NA	0502-0000-0032-0024	0.00376191
2.56727	NA	0502-0000-0030-0024	0.00187048
2.56727	NA	0502-0000-0032-0024	0.00375816
2.57569	NA	0502-0000-0030-0024	0.00186797
2.57569	NA	0502-0000-0032-0024	0.00374841
2.5841	NA	0502-0000-0030-0024	0.00186497
2.5841	NA	0502-0000-0032-0024	0.00373965
2.59252	NA	0502-0000-0030-0024	0.00186121
2.59252	NA	0502-0000-0032-0024	0.0037352
2.60094	NA	0502-0000-0030-0024	0.00185835
2.60094	NA	0502-0000-0032-0024	0.00373149
2.60936	NA	0502-0000-0030-0024	0.00185755
2.60936	NA	0502-0000-0032-0024	0.00372885
2.61777	NA	0502-0000-0030-0024	0.00185674
2.61777	NA	0502-0000-0032-0024	0.00372633
2.62619	NA	0502-0000-0030-0024	0.00185535
2.62619	NA	0502-0000-0032-0024	0.00372347
2.63461	NA	0502-0000-0030-0024	0.00185203
2.63461	NA	0502-0000-0032-0024	0.00371925
2.64302	NA	0502-0000-0030-0024	0.00184695
2.64302	NA	0502-0000-0032-0024	0.0037141
2.65144	NA	0502-0000-0030-0024	0.00184283
2.65144	NA	0502-0000-0032-0024	0.00370939
2.65986	NA	0502-0000-0030-0024	0.00183928
2.65986	NA	0502-0000-0032-0024	0.00370454
2.66828	NA	0502-0000-0030-0024	0.00183718
2.66828	NA	0502-0000-0032-0024	0.00369964
2.67669	NA	0502-0000-0030-0024	0.0018372
2.67669	NA	0502-0000-0032-0024	0.00369544
2.68511	NA	0502-0000-0030-0024	0.00183719
2.68511	NA	0502-0000-0032-0024	0.00369325
2.69353	NA	0502-0000-0030-0024	0.00183549
2.69353	NA	0502-0000-0032-0024	0.00369177
2.70195	NA	0502-0000-0030-0024	0.00183375
2.70195	NA	0502-0000-0032-0024	0.00369014
2.71036	NA	0502-0000-0030-0024	0.00183343
2.71036	NA	0502-0000-0032-0024	0.00368685
2.71878	NA	0502-0000-0030-0024	0.00183318
2.71878	NA	0502-0000-0032-0024	0.003682
2.7272	NA	0502-0000-0030-0024	0.00183266
2.7272	NA	0502-0000-0032-0024	0.00367606
2.73561	NA	0502-0000-0030-0024	0.00183043
2.73561	NA	0502-0000-0032-0024	0.00367207
2.74403	NA	0502-0000-0030-0024	0.00182567
2.74403	NA	0502-0000-0032-0024	0.00366902
2.75245	NA	0502-0000-0030-0024	0.00181972
2.75245	NA	0502-0000-0032-0024	0.00366707
2.76087	NA	0502-0000-0030-0024	0.00181243
2.76087	NA	0502-0000-0032-0024	0.00366676
2.76928	NA	0502-0000-0030-0024	0.00180711
2.76928	NA	0502-0000-0032-0024	0.00366532
2.7777	NA	0502-0000-0030-0024	0.00180605
2.7777	NA	0502-0000-0032-0024	0.0036627
2.78612	NA	0502-0000-0030-0024	0.00180607
2.78612	NA	0502-0000-0032-0024	0.00365905
2.79454	NA	0502-0000-0030-0024	0.00180605
2.79454	NA	0502-0000-0032-0024	0.00365782
2.80295	NA	0502-0000-0030-0024	0.00180555
2.80295	NA	0502-0000-0032-0024	0.00365634
2.81137	NA	0502-0000-0030-0024	0.0018042
2.81137	NA	0502-0000-0032-0024	0.00365452
2.81979	NA	0502-0000-0030-0024	0.0018013
2.81979	NA	0502-0000-0032-0024	0.00365238
2.8282	NA	0502-0000-0030-0024	0.00179803
2.8282	NA	0502-0000-0032-0024	0.00364981
2.83662	NA	0502-0000-0030-0024	0.0017965
2.83662	NA	0502-0000-0032-0024	0.0036464
2.84504	NA	0502-0000-0030-0024	0.00179517
2.84504	NA	0502-0000-0032-0024	0.00364205
2.85346	NA	0502-0000-0030-0024	0.00179404
2.85346	NA	0502-0000-0032-0024	0.003636
2.86187	NA	0502-0000-0030-0024	0.00179321
2.86187	NA	0502-0000-0032-0024	0.00363001
2.87029	NA	0502-0000-0030-0024	0.00179224
2.87029	NA	0502-0000-0032-0024	0.00362805
2.87871	NA	0502-0000-0030-0024	0.00179052
2.87871	NA	0502-0000-0032-0024	0.00362657
2.88713	NA	0502-0000-0030-0024	0.00178735
2.88713	NA	0502-0000-0032-0024	0.00362488
2.89554	NA	0502-0000-0030-0024	0.00178283
2.89554	NA	0502-0000-0032-0024	0.00362243
2.90396	NA	0502-0000-0030-0024	0.00177845
2.90396	NA	0502-0000-0032-0024	0.00361916
2.91238	NA	0502-0000-0030-0024	0.00177397
2.91238	NA	0502-0000-0032-0024	0.0036145
2.92079	NA	0502-0000-0030-0024	0.0017698
2.92079	NA	0502-0000-0032-0024	0.00360881
2.92921	NA	0502-0000-0030-0024	0.00176646
2.92921	NA	0502-0000-0032-0024	0.00360314
2.93763	NA	0502-0000-0030-0024	0.00176401
2.93763	NA	0502-0000-0032-0024	0.00359735
2.94605	NA	0502-0000-0030-0024	0.00176238
2.94605	NA	0502-0000-0032-0024	0.00359131
2.95446	NA	0502-0000-0030-0024	0.00176045
2.95446	NA	0502-0000-0032-0024	0.0035871
2.96288	NA	0502-0000-0030-0024	0.00175728
2.96288	NA	0502-0000-0032-0024	0.00358359
2.9713	NA	0502-0000-0030-0024	0.00175397
2.9713	NA	0502-0000-0032-0024	0.00358
2.97972	NA	0502-0000-0030-0024	0.001752
2.97972	NA	0502-0000-0032-0024	0.003576
2.98813	NA	0502-0000-0030-0024	0.00175114
2.98813	NA	0502-0000-0032-0024	0.00357076
2.99655	NA	0502-0000-0030-0024	0.00175091
2.99655	NA	0502-0000-0032-0024	0.00356198
3.00497	NA	0502-0000-0030-0024	0.0017505
3.00497	NA	0502-0000-0032-0024	0.00355717
3.01338	NA	0502-0000-0030-0024	0.00174888
3.01338	NA	0502-0000-0032-0024	0.00355293
3.0218	NA	0502-0000-0030-0024	0.00174568
3.0218	NA	0502-0000-0032-0024	0.00354883
3.03022	NA	0502-0000-0030-0024	0.00174047
3.03022	NA	0502-0000-0032-0024	0.00354485
3.03864	NA	0502-0000-0030-0024	0.00173509
3.03864	NA	0502-0000-0032-0024	0.00354101
3.04705	NA	0502-0000-0030-0024	0.00173097
3.04705	NA	0502-0000-0032-0024	0.003537
3.05547	NA	0502-0000-0030-0024	0.00172681
3.05547	NA	0502-0000-0032-0024	0.00353286
3.06389	NA	0502-0000-0030-0024	0.00172237
3.06389	NA	0502-0000-0032-0024	0.00352886
3.07231	NA	0502-0000-0030-0024	0.00171925
3.07231	NA	0502-0000-0032-0024	0.00352577
3.08072	NA	0502-0000-0030-0024	0.00171851
3.08072	NA	0502-0000-0032-0024	0.00352338
3.08914	NA	0502-0000-0030-0024	0.00171749
3.08914	NA	0502-0000-0032-0024	0.00352181
3.09756	NA	0502-0000-0030-0024	0.00171568
3.09756	NA	0502-0000-0032-0024	0.00352005
3.10598	NA	0502-0000-0030-0024	0.0017128
3.10598	NA	0502-0000-0032-0024	0.00351771
3.11439	NA	0502-0000-0030-0024	0.00170931
3.11439	NA	0502-0000-0032-0024	0.00351442
3.12281	NA	0502-0000-0030-0024	0.00170613
3.12281	NA	0502-0000-0032-0024	0.00350866
3.13123	NA	0502-0000-0030-0024	0.00170272
3.13123	NA	0502-0000-0032-0024	0.00350286
3.13964	NA	0502-0000-0030-0024	0.0016987
3.13964	NA	0502-0000-0032-0024	0.00349864
3.14806	NA	0502-0000-0030-0024	0.00169503
3.14806	NA	0502-0000-0032-0024	0.00349517
3.15648	NA	0502-0000-0030-0024	0.00169291
3.15648	NA	0502-0000-0032-0024	0.00349188
3.1649	NA	0502-0000-0030-0024	0.00169067
3.1649	NA	0502-0000-0032-0024	0.0034889
3.17331	NA	0502-0000-0030-0024	0.00168783
3.17331	NA	0502-0000-0032-0024	0.00348677
3.18173	NA	0502-0000-0030-0024	0.00168502
3.18173	NA	0502-0000-0032-0024	0.00348459
3.19015	NA	0502-0000-0030-0024	0.00168301
3.19015	NA	0502-0000-0032-0024	0.00348159
3.19857	NA	0502-0000-0030-0024	0.0016816
3.19857	NA	0502-0000-0032-0024	0.00347768
3.20698	NA	0502-0000-0030-0024	0.00168096
3.20698	NA	0502-0000-0032-0024	0.00347198
3.2154	NA	0502-0000-0030-0024	0.00168106
3.2154	NA	0502-0000-0032-0024	0.00346484
3.22382	NA	0502-0000-0030-0024	0.00168133
3.22382	NA	0502-0000-0032-0024	0.00346119
3.23223	NA	0502-0000-0030-0024	0.00168082
3.23223	NA	0502-0000-0032-0024	0.00345775
3.24065	NA	0502-0000-0030-0024	0.00167857
3.24065	NA	0502-0000-0032-0024	0.00345426
3.24907	NA	0502-0000-0030-0024	0.00167576
3.24907	NA	0502-0000-0032-0024	0.00345072
3.25749	NA	0502-0000-0030-0024	0.00167379
3.25749	NA	0502-0000-0032-0024	0.00344701
3.2659	NA	0502-0000-0030-0024	0.00167237
3.2659	NA	0502-0000-0032-0024	0.00344231
3.27432	NA	0502-0000-0030-0024	0.00167113
3.27432	NA	0502-0000-0032-0024	0.00343503
3.28274	NA	0502-0000-0030-0024	0.00166976
3.28274	NA	0502-0000-0032-0024	0.00342577
3.29116	NA	0502-0000-0030-0024	0.00166803
3.29116	NA	0502-0000-0032-0024	0.00341637
3.29957	NA	0502-0000-0030-0024	0.00166573
3.29957	NA	0502-0000-0032-0024	0.00340731
3.30799	NA	0502-0000-0030-0024	0.00166269
3.30799	NA	0502-0000-0032-0024	0.00339849
3.31641	NA	0502-0000-0030-0024	0.00165978
3.31641	NA	0502-0000-0032-0024	0.00339043
3.32482	NA	0502-0000-0030-0024	0.0016575
3.32482	NA	0502-0000-0032-0024	0.00338671
3.33324	NA	0502-0000-0030-0024	0.00165524
3.33324	NA	0502-0000-0032-0024	0.00338487
3.34166	NA	0502-0000-0030-0024	0.00165292
3.34166	NA	0502-0000-0032-0024	0.00338255
3.35008	NA	0502-0000-0030-0024	0.00165041
3.35008	NA	0502-0000-0032-0024	0.00337965
3.35849	NA	0502-0000-0030-0024	0.00164774
3.35849	NA	0502-0000-0032-0024	0.00337534
3.36691	NA	0502-0000-0030-0024	0.00164532
3.36691	NA	0502-0000-0032-0024	0.00336928
3.37533	NA	0502-0000-0030-0024	0.00164331
3.37533	NA	0502-0000-0032-0024	0.00336335
3.38375	NA	0502-0000-0030-0024	0.00164107
3.38375	NA	0502-0000-0032-0024	0.00335642
3.39216	NA	0502-0000-0030-0024	0.00163845
3.39216	NA	0502-0000-0032-0024	0.00334726
3.40058	NA	0502-0000-0030-0024	0.00163563
3.40058	NA	0502-0000-0032-0024	0.00334157
3.409	NA	0502-0000-0030-0024	0.00163318
3.409	NA	0502-0000-0032-0024	0.00333749
3.41741	NA	0502-0000-0030-0024	0.00163158
3.41741	NA	0502-0000-0032-0024	0.00333474
3.42583	NA	0502-0000-0030-0024	0.00163072
3.42583	NA	0502-0000-0032-0024	0.00333251
3.43425	NA	0502-0000-0030-0024	0.00162943
3.43425	NA	0502-0000-0032-0024	0.00332985
3.44267	NA	0502-0000-0030-0024	0.0016274
3.44267	NA	0502-0000-0032-0024	0.00332544
3.45108	NA	0502-0000-0030-0024	0.00162345
3.45108	NA	0502-0000-0032-0024	0.00331971
3.4595	NA	0502-0000-0030-0024	0.00161862
3.4595	NA	0502-0000-0032-0024	0.00331383
3.46792	NA	0502-0000-0030-0024	0.00161535
3.46792	NA	0502-0000-0032-0024	0.00330769
3.47634	NA	0502-0000-0030-0024	0.00161309
3.47634	NA	0502-0000-0032-0024	0.00330096
3.48475	NA	0502-0000-0030-0024	0.00161175
3.48475	NA	0502-0000-0032-0024	0.00329504
3.49317	NA	0502-0000-0030-0024	0.00161039
3.49317	NA	0502-0000-0032-0024	0.00328936
3.50159	NA	0502-0000-0030-0024	0.00160831
3.50159	NA	0502-0000-0032-0024	0.00328357
3.51	NA	0502-0000-0030-0024	0.00160471
3.51	NA	0502-0000-0032-0024	0.00327784
3.51842	NA	0502-0000-0030-0024	0.00160162
3.51842	NA	0502-0000-0032-0024	0.00327283
3.52684	NA	0502-0000-0030-0024	0.00160044
3.52684	NA	0502-0000-0032-0024	0.00326814
3.53526	NA	0502-0000-0030-0024	0.00159914
3.53526	NA	0502-0000-0032-0024	0.00326401
3.54367	NA	0502-0000-0030-0024	0.00159751
3.54367	NA	0502-0000-0032-0024	0.00326142
3.55209	NA	0502-0000-0030-0024	0.00159443
3.55209	NA	0502-0000-0032-0024	0.00325888
3.56051	NA	0502-0000-0030-0024	0.00158948
3.56051	NA	0502-0000-0032-0024	0.00325611
3.56893	NA	0502-0000-0030-0024	0.00158465
3.56893	NA	0502-0000-0032-0024	0.00325301
3.57734	NA	0502-0000-0030-0024	0.00158071
3.57734	NA	0502-0000-0032-0024	0.00324916
3.58576	NA	0502-0000-0030-0024	0.00157709
3.58576	NA	0502-0000-0032-0024	0.00324555
3.59418	NA	0502-0000-0030-0024	0.00157363
3.59418	NA	0502-0000-0032-0024	0.00324226
3.60259	NA	0502-0000-0030-0024	0.0015705
3.60259	NA	0502-0000-0032-0024	0.00323973
3.61101	NA	0502-0000-0030-0024	0.00156768
3.61101	NA	0502-0000-0032-0024	0.00323714
3.61943	NA	0502-0000-0030-0024	0.00156482
3.61943	NA	0502-0000-0032-0024	0.00323382
3.62785	NA	0502-0000-0030-0024	0.0015618
3.62785	NA	0502-0000-0032-0024	0.00322949
3.63626	NA	0502-0000-0030-0024	0.00155911
3.63626	NA	0502-0000-0032-0024	0.00322352
3.64468	NA	0502-0000-0030-0024	0.00155727
3.64468	NA	0502-0000-0032-0024	0.00322068
3.6531	NA	0502-0000-0030-0024	0.00155553
3.6531	NA	0502-0000-0032-0024	0.00321959
3.66152	NA	0502-0000-0030-0024	0.00155347
3.66152	NA	0502-0000-0032-0024	0.0032198
3.66993	NA	0502-0000-0030-0024	0.00155139
3.66993	NA	0502-0000-0032-0024	0.00322007
3.67835	NA	0502-0000-0030-0024	0.00154943
3.67835	NA	0502-0000-0032-0024	0.00322075
3.68677	NA	0502-0000-0030-0024	0.00154717
3.68677	NA	0502-0000-0032-0024	0.00322083
3.69518	NA	0502-0000-0030-0024	0.0015435
3.69518	NA	0502-0000-0032-0024	0.00322015
3.7036	NA	0502-0000-0030-0024	0.00153759
3.7036	NA	0502-0000-0032-0024	0.00321804
3.71202	NA	0502-0000-0030-0024	0.00153159
3.71202	NA	0502-0000-0032-0024	0.00321561
3.72044	NA	0502-0000-0030-0024	0.00152679
3.72044	NA	0502-0000-0032-0024	0.00321327
3.72885	NA	0502-0000-0030-0024	0.00152264
3.72885	NA	0502-0000-0032-0024	0.00321176
3.73727	NA	0502-0000-0030-0024	0.00151911
3.73727	NA	0502-0000-0032-0024	0.00321053
3.74569	NA	0502-0000-0030-0024	0.00151752
3.74569	NA	0502-0000-0032-0024	0.00320942
3.75411	NA	0502-0000-0030-0024	0.00151825
3.75411	NA	0502-0000-0032-0024	0.00320774
3.76252	NA	0502-0000-0030-0024	0.00151924
3.76252	NA	0502-0000-0032-0024	0.00320545
3.77094	NA	0502-0000-0030-0024	0.00152011
3.77094	NA	0502-0000-0032-0024	0.00320227
3.77936	NA	0502-0000-0030-0024	0.00152044
3.77936	NA	0502-0000-0032-0024	0.00319901
3.78777	NA	0502-0000-0030-0024	0.00152024
3.78777	NA	0502-0000-0032-0024	0.00319539
3.79619	NA	0502-0000-0030-0024	0.00151989
3.79619	NA	0502-0000-0032-0024	0.00319131
3.80461	NA	0502-0000-0030-0024	0.00151972
3.80461	NA	0502-0000-0032-0024	0.00318619
3.81303	NA	0502-0000-0030-0024	0.00151908
3.81303	NA	0502-0000-0032-0024	0.00317974
3.82144	NA	0502-0000-0030-0024	0.00151756
3.82144	NA	0502-0000-0032-0024	0.00317363
3.82986	NA	0502-0000-0030-0024	0.00151665
3.82986	NA	0502-0000-0032-0024	0.00316791
3.83828	NA	0502-0000-0030-0024	0.00151731
3.83828	NA	0502-0000-0032-0024	0.00316285
3.8467	NA	0502-0000-0030-0024	0.00151785
3.8467	NA	0502-0000-0032-0024	0.00315798
3.85511	NA	0502-0000-0030-0024	0.00151801
3.85511	NA	0502-0000-0032-0024	0.00315324
3.86353	NA	0502-0000-0030-0024	0.00151781
3.86353	NA	0502-0000-0032-0024	0.0031485
3.87195	NA	0502-0000-0030-0024	0.00151692
3.87195	NA	0502-0000-0032-0024	0.00314365
3.88036	NA	0502-0000-0030-0024	0.00151589
3.88036	NA	0502-0000-0032-0024	0.00313827
3.88878	NA	0502-0000-0030-0024	0.0015159
3.88878	NA	0502-0000-0032-0024	0.00313319
3.8972	NA	0502-0000-0030-0024	0.00151616
3.8972	NA	0502-0000-0032-0024	0.00312808
3.90562	NA	0502-0000-0030-0024	0.00151617
3.90562	NA	0502-0000-0032-0024	0.00312275
3.91403	NA	0502-0000-0030-0024	0.00151567
3.91403	NA	0502-0000-0032-0024	0.00311631
3.92245	NA	0502-0000-0030-0024	0.00151429
3.92245	NA	0502-0000-0032-0024	0.0031083
3.93087	NA	0502-0000-0030-0024	0.00151072
3.93087	NA	0502-0000-0032-0024	0.00309703
3.93929	NA	0502-0000-0030-0024	0.00150527
3.93929	NA	0502-0000-0032-0024	0.00308699
3.9477	NA	0502-0000-0030-0024	0.00150022
3.9477	NA	0502-0000-0032-0024	0.00307872
3.95612	NA	0502-0000-0030-0024	0.00149581
3.95612	NA	0502-0000-0032-0024	0.00307141
3.96454	NA	0502-0000-0030-0024	0.00149172
3.96454	NA	0502-0000-0032-0024	0.00306428
3.97295	NA	0502-0000-0030-0024	0.00148804
3.97295	NA	0502-0000-0032-0024	0.00305726
3.98137	NA	0502-0000-0030-0024	0.00148532
3.98137	NA	0502-0000-0032-0024	0.00305013
3.98979	NA	0502-0000-0030-0024	0.00148405
3.98979	NA	0502-0000-0032-0024	0.00304295
3.99821	NA	0502-0000-0030-0024	0.00148326
3.99821	NA	0502-0000-0032-0024	0.00303556
4.00662	NA	0502-0000-0030-0024	0.00148174
4.00662	NA	0502-0000-0032-0024	0.00302729
4.01504	NA	0502-0000-0030-0024	0.00147924
4.01504	NA	0502-0000-0032-0024	0.00301921
4.02346	NA	0502-0000-0030-0024	0.00147651
4.02346	NA	0502-0000-0032-0024	0.00301542
4.03188	NA	0502-0000-0030-0024	0.00147484
4.03188	NA	0502-0000-0032-0024	0.00301547
4.04029	NA	0502-0000-0030-0024	0.00147317
4.04029	NA	0502-0000-0032-0024	0.00301537
4.04871	NA	0502-0000-0030-0024	0.00147064
4.04871	NA	0502-0000-0032-0024	0.00301518
4.05713	NA	0502-0000-0030-0024	0.00146691
4.05713	NA	0502-0000-0032-0024	0.0030156
4.06554	NA	0502-0000-0030-0024	0.00146209
4.06554	NA	0502-0000-0032-0024	0.00301587
4.07396	NA	0502-0000-0030-0024	0.00145707
4.07396	NA	0502-0000-0032-0024	0.00301567
4.08238	NA	0502-0000-0030-0024	0.00145257
4.08238	NA	0502-0000-0032-0024	0.00301448
4.0908	NA	0502-0000-0030-0024	0.00144915
4.0908	NA	0502-0000-0032-0024	0.00301044
4.09921	NA	0502-0000-0030-0024	0.00144602
4.09921	NA	0502-0000-0032-0024	0.00300694
4.10763	NA	0502-0000-0030-0024	0.00144314
4.10763	NA	0502-0000-0032-0024	0.00300274
4.11605	NA	0502-0000-0030-0024	0.0014405
4.11605	NA	0502-0000-0032-0024	0.00299739
4.12447	NA	0502-0000-0030-0024	0.00143815
4.12447	NA	0502-0000-0032-0024	0.00298937
4.13288	NA	0502-0000-0030-0024	0.00143832
4.13288	NA	0502-0000-0032-0024	0.00298295
4.1413	NA	0502-0000-0030-0024	0.00144184
4.1413	NA	0502-0000-0032-0024	0.00297706
4.14972	NA	0502-0000-0030-0024	0.00144506
4.14972	NA	0502-0000-0032-0024	0.00297082
4.15813	NA	0502-0000-0030-0024	0.00144737
4.15813	NA	0502-0000-0032-0024	0.00296411
4.16655	NA	0502-0000-0030-0024	0.0014487
4.16655	NA	0502-0000-0032-0024	0.00295612
4.17497	NA	0502-0000-0030-0024	0.00144815
4.17497	NA	0502-0000-0032-0024	0.00294785
4.18339	NA	0502-0000-0030-0024	0.00144414
4.18339	NA	0502-0000-0032-0024	0.00294325
4.1918	NA	0502-0000-0030-0024	0.0014384
4.1918	NA	0502-0000-0032-0024	0.00294183
4.20022	NA	0502-0000-0030-0024	0.00143425
4.20022	NA	0502-0000-0032-0024	0.00294082
4.20864	NA	0502-0000-0030-0024	0.00143092
4.20864	NA	0502-0000-0032-0024	0.00293871
4.21706	NA	0502-0000-0030-0024	0.00142778
4.21706	NA	0502-0000-0032-0024	0.00293564
4.22547	NA	0502-0000-0030-0024	0.00142475
4.22547	NA	0502-0000-0032-0024	0.002932
4.23389	NA	0502-0000-0030-0024	0.00142171
4.23389	NA	0502-0000-0032-0024	0.00292892
4.24231	NA	0502-0000-0030-0024	0.00141879
4.24231	NA	0502-0000-0032-0024	0.00292819
4.25072	NA	0502-0000-0030-0024	0.00141707
4.25072	NA	0502-0000-0032-0024	0.00292872
4.25914	NA	0502-0000-0030-0024	0.00141656
4.25914	NA	0502-0000-0032-0024	0.00292905
4.26756	NA	0502-0000-0030-0024	0.00141575
4.26756	NA	0502-0000-0032-0024	0.00292883
4.27598	NA	0502-0000-0030-0024	0.00141429
4.27598	NA	0502-0000-0032-0024	0.00292725
4.28439	NA	0502-0000-0030-0024	0.00141267
4.28439	NA	0502-0000-0032-0024	0.00292102
4.29281	NA	0502-0000-0030-0024	0.00141102
4.29281	NA	0502-0000-0032-0024	0.00291407
4.30123	NA	0502-0000-0030-0024	0.0014087
4.30123	NA	0502-0000-0032-0024	0.00290625
4.30965	NA	0502-0000-0030-0024	0.00140586
4.30965	NA	0502-0000-0032-0024	0.00289736
4.31806	NA	0502-0000-0030-0024	0.00140249
4.31806	NA	0502-0000-0032-0024	0.00289069
4.32648	NA	0502-0000-0030-0024	0.00139839
4.32648	NA	0502-0000-0032-0024	0.00288398
4.3349	NA	0502-0000-0030-0024	0.00139463
4.3349	NA	0502-0000-0032-0024	0.00287707
4.34331	NA	0502-0000-0030-0024	0.00139229
4.34331	NA	0502-0000-0032-0024	0.00286956
4.35173	NA	0502-0000-0030-0024	0.00139024
4.35173	NA	0502-0000-0032-0024	0.00286267
4.36015	NA	0502-0000-0030-0024	0.00138767
4.36015	NA	0502-0000-0032-0024	0.00285694
4.36857	NA	0502-0000-0030-0024	0.00138438
4.36857	NA	0502-0000-0032-0024	0.0028547
4.37698	NA	0502-0000-0030-0024	0.00138062
4.37698	NA	0502-0000-0032-0024	0.00285337
4.3854	NA	0502-0000-0030-0024	0.00137698
4.3854	NA	0502-0000-0032-0024	0.00285261
4.39382	NA	0502-0000-0030-0024	0.00137318
4.39382	NA	0502-0000-0032-0024	0.00285132
4.40224	NA	0502-0000-0030-0024	0.00136682
4.40224	NA	0502-0000-0032-0024	0.00284926
4.41065	NA	0502-0000-0030-0024	0.00135736
4.41065	NA	0502-0000-0032-0024	0.00284455
4.41907	NA	0502-0000-0030-0024	0.00135051
4.41907	NA	0502-0000-0032-0024	0.0028356
4.42749	NA	0502-0000-0030-0024	0.00134779
4.42749	NA	0502-0000-0032-0024	0.00282915
4.4359	NA	0502-0000-0030-0024	0.00134725
4.4359	NA	0502-0000-0032-0024	0.00282626
4.44432	NA	0502-0000-0030-0024	0.00134775
4.44432	NA	0502-0000-0032-0024	0.00282405
4.45274	NA	0502-0000-0030-0024	0.00134781
4.45274	NA	0502-0000-0032-0024	0.00282117
4.46116	NA	0502-0000-0030-0024	0.00134619
4.46116	NA	0502-0000-0032-0024	0.00281764
4.46957	NA	0502-0000-0030-0024	0.00134401
4.46957	NA	0502-0000-0032-0024	0.0028134
4.47799	NA	0502-0000-0030-0024	0.00134248
4.47799	NA	0502-0000-0032-0024	0.00280928
4.48641	NA	0502-0000-0030-0024	0.00134129
4.48641	NA	0502-0000-0032-0024	0.00280462
4.49483	NA	0502-0000-0030-0024	0.00134139
4.49483	NA	0502-0000-0032-0024	0.00279937
4.50324	NA	0502-0000-0030-0024	0.00134286
4.50324	NA	0502-0000-0032-0024	0.00279353
4.51166	NA	0502-0000-0030-0024	0.00134379
4.51166	NA	0502-0000-0032-0024	0.0027896
4.52008	NA	0502-0000-0030-0024	0.00134395
4.52008	NA	0502-0000-0032-0024	0.00278781
4.52849	NA	0502-0000-0030-0024	0.00134228
4.52849	NA	0502-0000-0032-0024	0.00278672
4.53691	NA	0502-0000-0030-0024	0.00133879
4.53691	NA	0502-0000-0032-0024	0.00278526
4.54533	NA	0502-0000-0030-0024	0.00133519
4.54533	NA	0502-0000-0032-0024	0.00278243
4.55375	NA	0502-0000-0030-0024	0.00133151
4.55375	NA	0502-0000-0032-0024	0.00277863
4.56216	NA	0502-0000-0030-0024	0.00132765
4.56216	NA	0502-0000-0032-0024	0.00277505
4.57058	NA	0502-0000-0030-0024	0.00132468
4.57058	NA	0502-0000-0032-0024	0.00277202
4.579	NA	0502-0000-0030-0024	0.00132432
4.579	NA	0502-0000-0032-0024	0.00277068
4.58742	NA	0502-0000-0030-0024	0.00132592
4.58742	NA	0502-0000-0032-0024	0.00276896
4.59583	NA	0502-0000-0030-0024	0.00132839
4.59583	NA	0502-0000-0032-0024	0.00276684
4.60425	NA	0502-0000-0030-0024	0.00133137
4.60425	NA	0502-0000-0032-0024	0.00276389
4.61267	NA	0502-0000-0030-0024	0.00133416
4.61267	NA	0502-0000-0032-0024	0.00275958
4.62108	NA	0502-0000-0030-0024	0.0013363
4.62108	NA	0502-0000-0032-0024	0.00275569
4.6295	NA	0502-0000-0030-0024	0.0013374
4.6295	NA	0502-0000-0032-0024	0.00275152
4.63792	NA	0502-0000-0030-0024	0.00133764
4.63792	NA	0502-0000-0032-0024	0.00274706
4.64634	NA	0502-0000-0030-0024	0.00133813
4.64634	NA	0502-0000-0032-0024	0.0027421
4.65475	NA	0502-0000-0030-0024	0.00133862
4.65475	NA	0502-0000-0032-0024	0.00273576
4.66317	NA	0502-0000-0030-0024	0.00133881
4.66317	NA	0502-0000-0032-0024	0.00272671
4.67159	NA	0502-0000-0030-0024	0.0013386
4.67159	NA	0502-0000-0032-0024	0.0027184
4.68001	NA	0502-0000-0030-0024	0.00133753
4.68001	NA	0502-0000-0032-0024	0.00271371
4.68842	NA	0502-0000-0030-0024	0.00133556
4.68842	NA	0502-0000-0032-0024	0.00270894
4.69684	NA	0502-0000-0030-0024	0.00133349
4.69684	NA	0502-0000-0032-0024	0.00270398
4.70526	NA	0502-0000-0030-0024	0.00133109
4.70526	NA	0502-0000-0032-0024	0.0026977
4.71367	NA	0502-0000-0030-0024	0.00132808
4.71367	NA	0502-0000-0032-0024	0.00268829
4.72209	NA	0502-0000-0030-0024	0.00132413
4.72209	NA	0502-0000-0032-0024	0.00268144
4.73051	NA	0502-0000-0030-0024	0.00131952
4.73051	NA	0502-0000-0032-0024	0.00267766
4.73893	NA	0502-0000-0030-0024	0.0013151
4.73893	NA	0502-0000-0032-0024	0.002675
4.74734	NA	0502-0000-0030-0024	0.00131253
4.74734	NA	0502-0000-0032-0024	0.00267194
4.75576	NA	0502-0000-0030-0024	0.0013116
4.75576	NA	0502-0000-0032-0024	0.00266855
4.76418	NA	0502-0000-0030-0024	0.00131023
4.76418	NA	0502-0000-0032-0024	0.00266526
4.7726	NA	0502-0000-0030-0024	0.00130782
4.7726	NA	0502-0000-0032-0024	0.0026627
4.78101	NA	0502-0000-0030-0024	0.00130426
4.78101	NA	0502-0000-0032-0024	0.00265903
4.78943	NA	0502-0000-0030-0024	0.00130068
4.78943	NA	0502-0000-0032-0024	0.00265403
4.79785	NA	0502-0000-0030-0024	0.00129705
4.79785	NA	0502-0000-0032-0024	0.00264676
4.80626	NA	0502-0000-0030-0024	0.0012928
4.80626	NA	0502-0000-0032-0024	0.00264009
4.81468	NA	0502-0000-0030-0024	0.00128939
4.81468	NA	0502-0000-0032-0024	0.0026336
4.8231	NA	0502-0000-0030-0024	0.00128899
4.8231	NA	0502-0000-0032-0024	0.00262709
4.83152	NA	0502-0000-0030-0024	0.00129018
4.83152	NA	0502-0000-0032-0024	0.00261978
4.83993	NA	0502-0000-0030-0024	0.00129046
4.83993	NA	0502-0000-0032-0024	0.00261259
4.84835	NA	0502-0000-0030-0024	0.00128923
4.84835	NA	0502-0000-0032-0024	0.00260761
4.85677	NA	0502-0000-0030-0024	0.0012853
4.85677	NA	0502-0000-0032-0024	0.00260356
4.86519	NA	0502-0000-0030-0024	0.00127947
4.86519	NA	0502-0000-0032-0024	0.00259965
4.8736	NA	0502-0000-0030-0024	0.00127383
4.8736	NA	0502-0000-0032-0024	0.00259607
4.88202	NA	0502-0000-0030-0024	0.00126958
4.88202	NA	0502-0000-0032-0024	0.00259365
4.89044	NA	0502-0000-0030-0024	0.00126724
4.89044	NA	0502-0000-0032-0024	0.00259138
4.89885	NA	0502-0000-0030-0024	0.00126516
4.89885	NA	0502-0000-0032-0024	0.00258859
4.90727	NA	0502-0000-0030-0024	0.00126299
4.90727	NA	0502-0000-0032-0024	0.00258517
4.91569	NA	0502-0000-0030-0024	0.00126044
4.91569	NA	0502-0000-0032-0024	0.00258086
4.92411	NA	0502-0000-0030-0024	0.00125732
4.92411	NA	0502-0000-0032-0024	0.00257698
4.93252	NA	0502-0000-0030-0024	0.00125303
4.93252	NA	0502-0000-0032-0024	0.00257263
4.94094	NA	0502-0000-0030-0024	0.00124781
4.94094	NA	0502-0000-0032-0024	0.00256818
4.94936	NA	0502-0000-0030-0024	0.00124274
4.94936	NA	0502-0000-0032-0024	0.00256486
4.95778	NA	0502-0000-0030-0024	0.00123773
4.95778	NA	0502-0000-0032-0024	0.00256116
4.96619	NA	0502-0000-0030-0024	0.00123262
4.96619	NA	0502-0000-0032-0024	0.00255724
4.97461	NA	0502-0000-0030-0024	0.00122746
4.97461	NA	0502-0000-0032-0024	0.00255381
4.98303	NA	0502-0000-0030-0024	0.00122201
4.98303	NA	0502-0000-0032-0024	0.00255126
4.99144	NA	0502-0000-0030-0024	0.00121611
4.99144	NA	0502-0000-0032-0024	0.00254949
4.99986	NA	0502-0000-0030-0024	0.00120963
4.99986	NA	0502-0000-0032-0024	0.00254807
5.00828	NA	0502-0000-0030-0024	0.00120319
5.00828	NA	0502-0000-0032-0024	0.00254564
5.0167	NA	0502-0000-0030-0024	0.00119869
5.0167	NA	0502-0000-0032-0024	0.00254214
5.02511	NA	0502-0000-0030-0024	0.00119614
5.02511	NA	0502-0000-0032-0024	0.00253656
5.03353	NA	0502-0000-0030-0024	0.00119408
5.03353	NA	0502-0000-0032-0024	0.00252925
5.04195	NA	0502-0000-0030-0024	0.0011915
5.04195	NA	0502-0000-0032-0024	0.00252555
5.05037	NA	0502-0000-0030-0024	0.00118709
5.05037	NA	0502-0000-0032-0024	0.00252316
5.05878	NA	0502-0000-0030-0024	0.00118005
5.05878	NA	0502-0000-0032-0024	0.00252037
5.0672	NA	0502-0000-0030-0024	0.00117262
5.0672	NA	0502-0000-0032-0024	0.00251604
5.07562	NA	0502-0000-0030-0024	0.00116718
5.07562	NA	0502-0000-0032-0024	0.00251064
5.08403	NA	0502-0000-0030-0024	0.00116504
5.08403	NA	0502-0000-0032-0024	0.00250612
5.09245	NA	0502-0000-0030-0024	0.00116496
5.09245	NA	0502-0000-0032-0024	0.00250388
5.10087	NA	0502-0000-0030-0024	0.00116475
5.10087	NA	0502-0000-0032-0024	0.00250218
5.10929	NA	0502-0000-0030-0024	0.0011627
5.10929	NA	0502-0000-0032-0024	0.00250115
5.1177	NA	0502-0000-0030-0024	0.00115919
5.1177	NA	0502-0000-0032-0024	0.00250136
5.12612	NA	0502-0000-0030-0024	0.00115511
5.12612	NA	0502-0000-0032-0024	0.00250174
5.13454	NA	0502-0000-0030-0024	0.00115143
5.13454	NA	0502-0000-0032-0024	0.00250146
5.14296	NA	0502-0000-0030-0024	0.00114897
5.14296	NA	0502-0000-0032-0024	0.00249869
5.15137	NA	0502-0000-0030-0024	0.00114758
5.15137	NA	0502-0000-0032-0024	0.00249404
5.15979	NA	0502-0000-0030-0024	0.00114619
5.15979	NA	0502-0000-0032-0024	0.00248981
5.16821	NA	0502-0000-0030-0024	0.0011443
5.16821	NA	0502-0000-0032-0024	0.00248839
5.17663	NA	0502-0000-0030-0024	0.00114134
5.17663	NA	0502-0000-0032-0024	0.00248666
5.18504	NA	0502-0000-0030-0024	0.00113686
5.18504	NA	0502-0000-0032-0024	0.00248433
5.19346	NA	0502-0000-0030-0024	0.00113084
5.19346	NA	0502-0000-0032-0024	0.00248119
5.20188	NA	0502-0000-0030-0024	0.00112572
5.20188	NA	0502-0000-0032-0024	0.00247635
5.21029	NA	0502-0000-0030-0024	0.00112343
5.21029	NA	0502-0000-0032-0024	0.00247078
5.21871	NA	0502-0000-0030-0024	0.00112279
5.21871	NA	0502-0000-0032-0024	0.00246417
5.22713	NA	0502-0000-0030-0024	0.00112244
5.22713	NA	0502-0000-0032-0024	0.00246055
5.23555	NA	0502-0000-0030-0024	0.00112186
5.23555	NA	0502-0000-0032-0024	0.00245766
5.24396	NA	0502-0000-0030-0024	0.00112087
5.24396	NA	0502-0000-0032-0024	0.00245538
5.25238	NA	0502-0000-0030-0024	0.00111962
5.25238	NA	0502-0000-0032-0024	0.0024534
5.2608	NA	0502-0000-0030-0024	0.00111827
5.2608	NA	0502-0000-0032-0024	0.00245095
5.26922	NA	0502-0000-0030-0024	0.00111641
5.26922	NA	0502-0000-0032-0024	0.00244795
5.27763	NA	0502-0000-0030-0024	0.00111413
5.27763	NA	0502-0000-0032-0024	0.00244306
5.28605	NA	0502-0000-0030-0024	0.00111191
5.28605	NA	0502-0000-0032-0024	0.00243379
5.29447	NA	0502-0000-0030-0024	0.0011091
5.29447	NA	0502-0000-0032-0024	0.00242496
5.30288	NA	0502-0000-0030-0024	0.00110487
5.30288	NA	0502-0000-0032-0024	0.00241956
5.3113	NA	0502-0000-0030-0024	0.0010987
5.3113	NA	0502-0000-0032-0024	0.00241621
5.31972	NA	0502-0000-0030-0024	0.00109293
5.31972	NA	0502-0000-0032-0024	0.00241313
5.32814	NA	0502-0000-0030-0024	0.00108935
5.32814	NA	0502-0000-0032-0024	0.00240878
5.33655	NA	0502-0000-0030-0024	0.00108707
5.33655	NA	0502-0000-0032-0024	0.00240341
5.34497	NA	0502-0000-0030-0024	0.00108523
5.34497	NA	0502-0000-0032-0024	0.00239788
5.35339	NA	0502-0000-0030-0024	0.00108318
5.35339	NA	0502-0000-0032-0024	0.00239308
5.36181	NA	0502-0000-0030-0024	0.00108055
5.36181	NA	0502-0000-0032-0024	0.00238833
5.37022	NA	0502-0000-0030-0024	0.00107715
5.37022	NA	0502-0000-0032-0024	0.00238322
5.37864	NA	0502-0000-0030-0024	0.00107269
5.37864	NA	0502-0000-0032-0024	0.00237688
5.38706	NA	0502-0000-0030-0024	0.00106656
5.38706	NA	0502-0000-0032-0024	0.00237352
5.39547	NA	0502-0000-0030-0024	0.00105775
5.39547	NA	0502-0000-0032-0024	0.00237096
5.40389	NA	0502-0000-0030-0024	0.00104763
5.40389	NA	0502-0000-0032-0024	0.00236765
5.41231	NA	0502-0000-0030-0024	0.00103975
5.41231	NA	0502-0000-0032-0024	0.00236351
5.42073	NA	0502-0000-0030-0024	0.00103553
5.42073	NA	0502-0000-0032-0024	0.00235798
5.42914	NA	0502-0000-0030-0024	0.00103326
5.42914	NA	0502-0000-0032-0024	0.00235199
5.43756	NA	0502-0000-0030-0024	0.0010316
5.43756	NA	0502-0000-0032-0024	0.00234745
5.44598	NA	0502-0000-0030-0024	0.00103111
5.44598	NA	0502-0000-0032-0024	0.00234309
5.4544	NA	0502-0000-0030-0024	0.00103221
5.4544	NA	0502-0000-0032-0024	0.0023385
5.46281	NA	0502-0000-0030-0024	0.00103344
5.46281	NA	0502-0000-0032-0024	0.0023344
5.47123	NA	0502-0000-0030-0024	0.00103378
5.47123	NA	0502-0000-0032-0024	0.00233361
5.47965	NA	0502-0000-0030-0024	0.00103295
5.47965	NA	0502-0000-0032-0024	0.00233348
5.48806	NA	0502-0000-0030-0024	0.00103084
5.48806	NA	0502-0000-0032-0024	0.00233339
5.49648	NA	0502-0000-0030-0024	0.00102787
5.49648	NA	0502-0000-0032-0024	0.00233362
5.5049	NA	0502-0000-0030-0024	0.00102364
5.5049	NA	0502-0000-0032-0024	0.00233545
5.51332	NA	0502-0000-0030-0024	0.00101937
5.51332	NA	0502-0000-0032-0024	0.0023379
5.52173	NA	0502-0000-0030-0024	0.00101701
5.52173	NA	0502-0000-0032-0024	0.00233948
5.53015	NA	0502-0000-0030-0024	0.00101519
5.53015	NA	0502-0000-0032-0024	0.00234018
5.53857	NA	0502-0000-0030-0024	0.00101337
5.53857	NA	0502-0000-0032-0024	0.00233917
5.54699	NA	0502-0000-0030-0024	0.00101193
5.54699	NA	0502-0000-0032-0024	0.00233463
5.5554	NA	0502-0000-0030-0024	0.00101266
5.5554	NA	0502-0000-0032-0024	0.00232754
5.56382	NA	0502-0000-0030-0024	0.00101552
5.56382	NA	0502-0000-0032-0024	0.00232134
5.57224	NA	0502-0000-0030-0024	0.00101798
5.57224	NA	0502-0000-0032-0024	0.00231682
5.58065	NA	0502-0000-0030-0024	0.00101993
5.58065	NA	0502-0000-0032-0024	0.00231321
5.58907	NA	0502-0000-0030-0024	0.00102121
5.58907	NA	0502-0000-0032-0024	0.0023108
5.59749	NA	0502-0000-0030-0024	0.00102143
5.59749	NA	0502-0000-0032-0024	0.00230822
5.60591	NA	0502-0000-0030-0024	0.00102048
5.60591	NA	0502-0000-0032-0024	0.00230551
5.61432	NA	0502-0000-0030-0024	0.00101782
5.61432	NA	0502-0000-0032-0024	0.00230267
5.62274	NA	0502-0000-0030-0024	0.00101359
5.62274	NA	0502-0000-0032-0024	0.00229878
5.63116	NA	0502-0000-0030-0024	0.0010112
5.63116	NA	0502-0000-0032-0024	0.00229072
5.63958	NA	0502-0000-0030-0024	0.00101454
5.63958	NA	0502-0000-0032-0024	0.0022843
5.64799	NA	0502-0000-0030-0024	0.00102181
5.64799	NA	0502-0000-0032-0024	0.00228004
5.65641	NA	0502-0000-0030-0024	0.00102839
5.65641	NA	0502-0000-0032-0024	0.00227548
5.66483	NA	0502-0000-0030-0024	0.00103416
5.66483	NA	0502-0000-0032-0024	0.00227026
5.67324	NA	0502-0000-0030-0024	0.00103902
5.67324	NA	0502-0000-0032-0024	0.00226272
5.68166	NA	0502-0000-0030-0024	0.00104273
5.68166	NA	0502-0000-0032-0024	0.00225419
5.69008	NA	0502-0000-0030-0024	0.00104517
5.69008	NA	0502-0000-0032-0024	0.00224778
5.6985	NA	0502-0000-0030-0024	0.00104504
5.6985	NA	0502-0000-0032-0024	0.00224194
5.70691	NA	0502-0000-0030-0024	0.00104234
5.70691	NA	0502-0000-0032-0024	0.00223619
5.71533	NA	0502-0000-0030-0024	0.00103946
5.71533	NA	0502-0000-0032-0024	0.00223085
5.72375	NA	0502-0000-0030-0024	0.00103727
5.72375	NA	0502-0000-0032-0024	0.00222719
5.73217	NA	0502-0000-0030-0024	0.00103583
5.73217	NA	0502-0000-0032-0024	0.00222406
5.74058	NA	0502-0000-0030-0024	0.00103339
5.74058	NA	0502-0000-0032-0024	0.00222146
5.749	NA	0502-0000-0030-0024	0.0010286
5.749	NA	0502-0000-0032-0024	0.00221937
5.75742	NA	0502-0000-0030-0024	0.00102282
5.75742	NA	0502-0000-0032-0024	0.00221646
5.76583	NA	0502-0000-0030-0024	0.00101771
5.76583	NA	0502-0000-0032-0024	0.00221288
5.77425	NA	0502-0000-0030-0024	0.00101307
5.77425	NA	0502-0000-0032-0024	0.00220888
5.78267	NA	0502-0000-0030-0024	0.00100868
5.78267	NA	0502-0000-0032-0024	0.00220378
5.79109	NA	0502-0000-0030-0024	0.00100443
5.79109	NA	0502-0000-0032-0024	0.00219471
5.7995	NA	0502-0000-0030-0024	0.000999198
5.7995	NA	0502-0000-0032-0024	0.00218479
5.80792	NA	0502-0000-0030-0024	0.000993008
5.80792	NA	0502-0000-0032-0024	0.00217615
5.81634	NA	0502-0000-0030-0024	0.000987814
5.81634	NA	0502-0000-0032-0024	0.00216897
5.82476	NA	0502-0000-0030-0024	0.000983066
5.82476	NA	0502-0000-0032-0024	0.00216464
5.83317	NA	0502-0000-0030-0024	0.000978566
5.83317	NA	0502-0000-0032-0024	0.00216246
5.84159	NA	0502-0000-0030-0024	0.000974192
5.84159	NA	0502-0000-0032-0024	0.00216085
5.85001	NA	0502-0000-0030-0024	0.000969956
5.85001	NA	0502-0000-0032-0024	0.00215962
5.85842	NA	0502-0000-0030-0024	0.000965874
5.85842	NA	0502-0000-0032-0024	0.00215811
5.86684	NA	0502-0000-0030-0024	0.000961542
5.86684	NA	0502-0000-0032-0024	0.00215598
5.87526	NA	0502-0000-0030-0024	0.000956669
5.87526	NA	0502-0000-0032-0024	0.00215362
5.88368	NA	0502-0000-0030-0024	0.000951976
5.88368	NA	0502-0000-0032-0024	0.00215275
5.89209	NA	0502-0000-0030-0024	0.000947861
5.89209	NA	0502-0000-0032-0024	0.00215378
5.90051	NA	0502-0000-0030-0024	0.000944181
5.90051	NA	0502-0000-0032-0024	0.00215346
5.90893	NA	0502-0000-0030-0024	0.000942138
5.90893	NA	0502-0000-0032-0024	0.00215169
5.91735	NA	0502-0000-0030-0024	0.000943313
5.91735	NA	0502-0000-0032-0024	0.00214776
5.92576	NA	0502-0000-0030-0024	0.000946713
5.92576	NA	0502-0000-0032-0024	0.00214321
5.93418	NA	0502-0000-0030-0024	0.000950811
5.93418	NA	0502-0000-0032-0024	0.00213824
5.9426	NA	0502-0000-0030-0024	0.000954818
5.9426	NA	0502-0000-0032-0024	0.00213368
5.95101	NA	0502-0000-0030-0024	0.000958097
5.95101	NA	0502-0000-0032-0024	0.00213017
5.95943	NA	0502-0000-0030-0024	0.000960171
5.95943	NA	0502-0000-0032-0024	0.00212662
5.96785	NA	0502-0000-0030-0024	0.000959931
5.96785	NA	0502-0000-0032-0024	0.00212306
5.97627	NA	0502-0000-0030-0024	0.000957006
5.97627	NA	0502-0000-0032-0024	0.00211954
5.98468	NA	0502-0000-0030-0024	0.000953272
5.98468	NA	0502-0000-0032-0024	0.00211546
5.9931	NA	0502-0000-0030-0024	0.000948422
5.9931	NA	0502-0000-0032-0024	0.00211075
6.00152	NA	0502-0000-0030-0024	0.000943966
6.00152	NA	0502-0000-0032-0024	0.00210533
6.00994	NA	0502-0000-0030-0024	0.000941859
6.00994	NA	0502-0000-0032-0024	0.00210152
6.01835	NA	0502-0000-0030-0024	0.000940342
6.01835	NA	0502-0000-0032-0024	0.00209802
6.02677	NA	0502-0000-0030-0024	0.000938709
6.02677	NA	0502-0000-0032-0024	0.00209415
6.03519	NA	0502-0000-0030-0024	0.000936455
6.03519	NA	0502-0000-0032-0024	0.00208978
6.0436	NA	0502-0000-0030-0024	0.00093435
6.0436	NA	0502-0000-0032-0024	0.00208456
6.05202	NA	0502-0000-0030-0024	0.000933444
6.05202	NA	0502-0000-0032-0024	0.00207964
6.06044	NA	0502-0000-0030-0024	0.000933405
6.06044	NA	0502-0000-0032-0024	0.0020744
6.06886	NA	0502-0000-0030-0024	0.000934361
6.06886	NA	0502-0000-0032-0024	0.00206869
6.07727	NA	0502-0000-0030-0024	0.000936827
6.07727	NA	0502-0000-0032-0024	0.00206249
6.08569	NA	0502-0000-0030-0024	0.000939731
6.08569	NA	0502-0000-0032-0024	0.00205895
6.09411	NA	0502-0000-0030-0024	0.000942229
6.09411	NA	0502-0000-0032-0024	0.00205506
6.10253	NA	0502-0000-0030-0024	0.00094404
6.10253	NA	0502-0000-0032-0024	0.00205042
6.11094	NA	0502-0000-0030-0024	0.000944875
6.11094	NA	0502-0000-0032-0024	0.00204384
6.11936	NA	0502-0000-0030-0024	0.000944563
6.11936	NA	0502-0000-0032-0024	0.00203921
6.12778	NA	0502-0000-0030-0024	0.000942094
6.12778	NA	0502-0000-0032-0024	0.00203533
6.13619	NA	0502-0000-0030-0024	0.000937749
6.13619	NA	0502-0000-0032-0024	0.00203247
6.14461	NA	0502-0000-0030-0024	0.000933452
6.14461	NA	0502-0000-0032-0024	0.00203162
6.15303	NA	0502-0000-0030-0024	0.000929312
6.15303	NA	0502-0000-0032-0024	0.00203009
6.16145	NA	0502-0000-0030-0024	0.000925244
6.16145	NA	0502-0000-0032-0024	0.00202775
6.16986	NA	0502-0000-0030-0024	0.000920054
6.16986	NA	0502-0000-0032-0024	0.00202382
6.17828	NA	0502-0000-0030-0024	0.000914471
6.17828	NA	0502-0000-0032-0024	0.00201921
6.1867	NA	0502-0000-0030-0024	0.000913653
6.1867	NA	0502-0000-0032-0024	0.00201369
6.19512	NA	0502-0000-0030-0024	0.000917235
6.19512	NA	0502-0000-0032-0024	0.00200591
6.20353	NA	0502-0000-0030-0024	0.000921128
6.20353	NA	0502-0000-0032-0024	0.00199664
6.21195	NA	0502-0000-0030-0024	0.000925166
6.21195	NA	0502-0000-0032-0024	0.00198913
6.22037	NA	0502-0000-0030-0024	0.0009285
6.22037	NA	0502-0000-0032-0024	0.00198346
6.22878	NA	0502-0000-0030-0024	0.000930924
6.22878	NA	0502-0000-0032-0024	0.00197782
6.2372	NA	0502-0000-0030-0024	0.000931612
6.2372	NA	0502-0000-0032-0024	0.00197226
6.24562	NA	0502-0000-0030-0024	0.000929817
6.24562	NA	0502-0000-0032-0024	0.00196742
6.25404	NA	0502-0000-0030-0024	0.000926504
6.25404	NA	0502-0000-0032-0024	0.00196458
6.26245	NA	0502-0000-0030-0024	0.000923512
6.26245	NA	0502-0000-0032-0024	0.00196174
6.27087	NA	0502-0000-0030-0024	0.000921787
6.27087	NA	0502-0000-0032-0024	0.00195869
6.27929	NA	0502-0000-0030-0024	0.000921058
6.27929	NA	0502-0000-0032-0024	0.00195541
6.28771	NA	0502-0000-0030-0024	0.000920112
6.28771	NA	0502-0000-0032-0024	0.00195172
6.29612	NA	0502-0000-0030-0024	0.000918492
6.29612	NA	0502-0000-0032-0024	0.00194753
6.30454	NA	0502-0000-0030-0024	0.000915962
6.30454	NA	0502-0000-0032-0024	0.00194217
6.31296	NA	0502-0000-0030-0024	0.000912962
6.31296	NA	0502-0000-0032-0024	0.00193737
6.32137	NA	0502-0000-0030-0024	0.000910436
6.32137	NA	0502-0000-0032-0024	0.00193728
6.32979	NA	0502-0000-0030-0024	0.000908024
6.32979	NA	0502-0000-0032-0024	0.00193742
6.33821	NA	0502-0000-0030-0024	0.000905641
6.33821	NA	0502-0000-0032-0024	0.00193693
6.34663	NA	0502-0000-0030-0024	0.000903212
6.34663	NA	0502-0000-0032-0024	0.0019334
6.35504	NA	0502-0000-0030-0024	0.000899239
6.35504	NA	0502-0000-0032-0024	0.00192718
6.36346	NA	0502-0000-0030-0024	0.000893037
6.36346	NA	0502-0000-0032-0024	0.00191931
6.37188	NA	0502-0000-0030-0024	0.000887502
6.37188	NA	0502-0000-0032-0024	0.00191302
6.3803	NA	0502-0000-0030-0024	0.000883442
6.3803	NA	0502-0000-0032-0024	0.00190802
6.38871	NA	0502-0000-0030-0024	0.000879899
6.38871	NA	0502-0000-0032-0024	0.00190333
6.39713	NA	0502-0000-0030-0024	0.000876415
6.39713	NA	0502-0000-0032-0024	0.00189751
6.40555	NA	0502-0000-0030-0024	0.000872455
6.40555	NA	0502-0000-0032-0024	0.00189046
6.41396	NA	0502-0000-0030-0024	0.000867705
6.41396	NA	0502-0000-0032-0024	0.00188175
6.42238	NA	0502-0000-0030-0024	0.000862111
6.42238	NA	0502-0000-0032-0024	0.00187416
6.4308	NA	0502-0000-0030-0024	0.000857442
6.4308	NA	0502-0000-0032-0024	0.00186855
6.43922	NA	0502-0000-0030-0024	0.000854449
6.43922	NA	0502-0000-0032-0024	0.00186369
6.44763	NA	0502-0000-0030-0024	0.000851658
6.44763	NA	0502-0000-0032-0024	0.00185996
6.45605	NA	0502-0000-0030-0024	0.000849106
6.45605	NA	0502-0000-0032-0024	0.00185803
6.46447	NA	0502-0000-0030-0024	0.000846491
6.46447	NA	0502-0000-0032-0024	0.00185974
6.47289	NA	0502-0000-0030-0024	0.000843168
6.47289	NA	0502-0000-0032-0024	0.00186302
6.4813	NA	0502-0000-0030-0024	0.000838973
6.4813	NA	0502-0000-0032-0024	0.00186549
6.48972	NA	0502-0000-0030-0024	0.000834649
6.48972	NA	0502-0000-0032-0024	0.00186668
6.49814	NA	0502-0000-0030-0024	0.000831311
6.49814	NA	0502-0000-0032-0024	0.0018664
6.50655	NA	0502-0000-0030-0024	0.000828251
6.50655	NA	0502-0000-0032-0024	0.0018635
6.51497	NA	0502-0000-0030-0024	0.000825072
6.51497	NA	0502-0000-0032-0024	0.00185995
6.52339	NA	0502-0000-0030-0024	0.000821513
6.52339	NA	0502-0000-0032-0024	0.00185569
6.53181	NA	0502-0000-0030-0024	0.000816071
6.53181	NA	0502-0000-0032-0024	0.0018503
6.54022	NA	0502-0000-0030-0024	0.000809281
6.54022	NA	0502-0000-0032-0024	0.00184509
6.54864	NA	0502-0000-0030-0024	0.000804784
6.54864	NA	0502-0000-0032-0024	0.0018418
6.55706	NA	0502-0000-0030-0024	0.000803867
6.55706	NA	0502-0000-0032-0024	0.0018385
6.56548	NA	0502-0000-0030-0024	0.000805592
6.56548	NA	0502-0000-0032-0024	0.001835
6.57389	NA	0502-0000-0030-0024	0.000807293
6.57389	NA	0502-0000-0032-0024	0.00183162
6.58231	NA	0502-0000-0030-0024	0.000808505
6.58231	NA	0502-0000-0032-0024	0.00182959
6.59073	NA	0502-0000-0030-0024	0.000809052
6.59073	NA	0502-0000-0032-0024	0.00182786
6.59914	NA	0502-0000-0030-0024	0.000808882
6.59914	NA	0502-0000-0032-0024	0.00182577
6.60756	NA	0502-0000-0030-0024	0.000808147
6.60756	NA	0502-0000-0032-0024	0.00182336
6.61598	NA	0502-0000-0030-0024	0.000807114
6.61598	NA	0502-0000-0032-0024	0.00182048
6.6244	NA	0502-0000-0030-0024	0.000805617
6.6244	NA	0502-0000-0032-0024	0.00181609
6.63281	NA	0502-0000-0030-0024	0.000803538
6.63281	NA	0502-0000-0032-0024	0.00181053
6.64123	NA	0502-0000-0030-0024	0.000800875
6.64123	NA	0502-0000-0032-0024	0.00180473
6.64965	NA	0502-0000-0030-0024	0.0007979
6.64965	NA	0502-0000-0032-0024	0.0017985
6.65807	NA	0502-0000-0030-0024	0.000793453
6.65807	NA	0502-0000-0032-0024	0.00179041
6.66648	NA	0502-0000-0030-0024	0.000787033
6.66648	NA	0502-0000-0032-0024	0.00177964
6.6749	NA	0502-0000-0030-0024	0.000782487
6.6749	NA	0502-0000-0032-0024	0.00177108
6.68332	NA	0502-0000-0030-0024	0.000781536
6.68332	NA	0502-0000-0032-0024	0.00176313
6.69173	NA	0502-0000-0030-0024	0.000782023
6.69173	NA	0502-0000-0032-0024	0.00175567
6.70015	NA	0502-0000-0030-0024	0.000783386
6.70015	NA	0502-0000-0032-0024	0.00174857
6.70857	NA	0502-0000-0030-0024	0.000785002
6.70857	NA	0502-0000-0032-0024	0.00174193
6.71699	NA	0502-0000-0030-0024	0.000786405
6.71699	NA	0502-0000-0032-0024	0.0017366
6.7254	NA	0502-0000-0030-0024	0.000787122
6.7254	NA	0502-0000-0032-0024	0.00173304
6.73382	NA	0502-0000-0030-0024	0.000786279
6.73382	NA	0502-0000-0032-0024	0.00173076
6.74224	NA	0502-0000-0030-0024	0.000783306
6.74224	NA	0502-0000-0032-0024	0.00172915
6.75066	NA	0502-0000-0030-0024	0.000779523
6.75066	NA	0502-0000-0032-0024	0.00172802
6.75907	NA	0502-0000-0030-0024	0.000775422
6.75907	NA	0502-0000-0032-0024	0.0017267
6.76749	NA	0502-0000-0030-0024	0.000771005
6.76749	NA	0502-0000-0032-0024	0.00172538
6.77591	NA	0502-0000-0030-0024	0.000765831
6.77591	NA	0502-0000-0032-0024	0.0017236
6.78432	NA	0502-0000-0030-0024	0.00075983
6.78432	NA	0502-0000-0032-0024	0.00172004
6.79274	NA	0502-0000-0030-0024	0.00075548
6.79274	NA	0502-0000-0032-0024	0.00171441
6.80116	NA	0502-0000-0030-0024	0.000754094
6.80116	NA	0502-0000-0032-0024	0.00170567
6.80958	NA	0502-0000-0030-0024	0.00075377
6.80958	NA	0502-0000-0032-0024	0.00169916
6.81799	NA	0502-0000-0030-0024	0.000753914
6.81799	NA	0502-0000-0032-0024	0.00169356
6.82641	NA	0502-0000-0030-0024	0.000754393
6.82641	NA	0502-0000-0032-0024	0.00168875
6.83483	NA	0502-0000-0030-0024	0.000754943
6.83483	NA	0502-0000-0032-0024	0.00168447
6.84325	NA	0502-0000-0030-0024	0.000754745
6.84325	NA	0502-0000-0032-0024	0.00167975
6.85166	NA	0502-0000-0030-0024	0.000752982
6.85166	NA	0502-0000-0032-0024	0.00167472
6.86008	NA	0502-0000-0030-0024	0.000750111
6.86008	NA	0502-0000-0032-0024	0.00167013
6.8685	NA	0502-0000-0030-0024	0.000747223
6.8685	NA	0502-0000-0032-0024	0.00166676
6.87691	NA	0502-0000-0030-0024	0.000745284
6.87691	NA	0502-0000-0032-0024	0.00166355
6.88533	NA	0502-0000-0030-0024	0.000744149
6.88533	NA	0502-0000-0032-0024	0.00166004
6.89375	NA	0502-0000-0030-0024	0.0007432
6.89375	NA	0502-0000-0032-0024	0.00165675
6.90217	NA	0502-0000-0030-0024	0.000742418
6.90217	NA	0502-0000-0032-0024	0.00165573
6.91058	NA	0502-0000-0030-0024	0.000741672
6.91058	NA	0502-0000-0032-0024	0.00165585
6.919	NA	0502-0000-0030-0024	0.000740699
6.919	NA	0502-0000-0032-0024	0.00165568
6.92742	NA	0502-0000-0030-0024	0.000737852
6.92742	NA	0502-0000-0032-0024	0.00165324
6.93584	NA	0502-0000-0030-0024	0.000733178
6.93584	NA	0502-0000-0032-0024	0.00164885
6.94425	NA	0502-0000-0030-0024	0.000730899
6.94425	NA	0502-0000-0032-0024	0.00164324
6.95267	NA	0502-0000-0030-0024	0.000731503
6.95267	NA	0502-0000-0032-0024	0.00163783
6.96109	NA	0502-0000-0030-0024	0.000732891
6.96109	NA	0502-0000-0032-0024	0.00163196
6.9695	NA	0502-0000-0030-0024	0.000733602
6.9695	NA	0502-0000-0032-0024	0.00162386
6.97792	NA	0502-0000-0030-0024	0.000733218
6.97792	NA	0502-0000-0032-0024	0.00161885
6.98634	NA	0502-0000-0030-0024	0.00072985
6.98634	NA	0502-0000-0032-0024	0.00161424
6.99476	NA	0502-0000-0030-0024	0.000723386
6.99476	NA	0502-0000-0032-0024	0.00160999
7.00317	NA	0502-0000-0030-0024	0.000716812
7.00317	NA	0502-0000-0032-0024	0.00160594
7.01159	NA	0502-0000-0030-0024	0.000710466
7.01159	NA	0502-0000-0032-0024	0.00160181
7.02001	NA	0502-0000-0030-0024	0.000703965
7.02001	NA	0502-0000-0032-0024	0.00159777
7.02843	NA	0502-0000-0030-0024	0.000698407
7.02843	NA	0502-0000-0032-0024	0.00159459
7.03684	NA	0502-0000-0030-0024	0.000696326
7.03684	NA	0502-0000-0032-0024	0.00159193
7.04526	NA	0502-0000-0030-0024	0.000697033
7.04526	NA	0502-0000-0032-0024	0.00158954
7.05368	NA	0502-0000-0030-0024	0.00069744
7.05368	NA	0502-0000-0032-0024	0.00158823
7.06209	NA	0502-0000-0030-0024	0.000697377
7.06209	NA	0502-0000-0032-0024	0.00158688
7.07051	NA	0502-0000-0030-0024	0.000696776
7.07051	NA	0502-0000-0032-0024	0.00158548
7.07893	NA	0502-0000-0030-0024	0.000694957
7.07893	NA	0502-0000-0032-0024	0.00158395
7.08735	NA	0502-0000-0030-0024	0.000692179
7.08735	NA	0502-0000-0032-0024	0.00158188
7.09576	NA	0502-0000-0030-0024	0.000690273
7.09576	NA	0502-0000-0032-0024	0.0015786
7.10418	NA	0502-0000-0030-0024	0.000689583
7.10418	NA	0502-0000-0032-0024	0.00157155
7.1126	NA	0502-0000-0030-0024	0.000689728
7.1126	NA	0502-0000-0032-0024	0.00156496
7.12102	NA	0502-0000-0030-0024	0.00068959
7.12102	NA	0502-0000-0032-0024	0.00155923
7.12943	NA	0502-0000-0030-0024	0.000688814
7.12943	NA	0502-0000-0032-0024	0.00155396
7.13785	NA	0502-0000-0030-0024	0.000685041
7.13785	NA	0502-0000-0032-0024	0.00154929
7.14627	NA	0502-0000-0030-0024	0.000679
7.14627	NA	0502-0000-0032-0024	0.00154592
7.15469	NA	0502-0000-0030-0024	0.000675001
7.15469	NA	0502-0000-0032-0024	0.00154285
7.1631	NA	0502-0000-0030-0024	0.000671837
7.1631	NA	0502-0000-0032-0024	0.00154045
7.17152	NA	0502-0000-0030-0024	0.000668403
7.17152	NA	0502-0000-0032-0024	0.00153929
7.17994	NA	0502-0000-0030-0024	0.000663753
7.17994	NA	0502-0000-0032-0024	0.00153778
7.18835	NA	0502-0000-0030-0024	0.000658603
7.18835	NA	0502-0000-0032-0024	0.00153584
7.19677	NA	0502-0000-0030-0024	0.000653914
7.19677	NA	0502-0000-0032-0024	0.00153292
7.20519	NA	0502-0000-0030-0024	0.000650089
7.20519	NA	0502-0000-0032-0024	0.00152961
7.21361	NA	0502-0000-0030-0024	0.000647187
7.21361	NA	0502-0000-0032-0024	0.00152579
7.22202	NA	0502-0000-0030-0024	0.000644396
7.22202	NA	0502-0000-0032-0024	0.00152018
7.23044	NA	0502-0000-0030-0024	0.000641551
7.23044	NA	0502-0000-0032-0024	0.00151367
7.23886	NA	0502-0000-0030-0024	0.000638546
7.23886	NA	0502-0000-0032-0024	0.00150771
7.24728	NA	0502-0000-0030-0024	0.000633836
7.24728	NA	0502-0000-0032-0024	0.00150204
7.25569	NA	0502-0000-0030-0024	0.000626857
7.25569	NA	0502-0000-0032-0024	0.00149652
7.26411	NA	0502-0000-0030-0024	0.000619804
7.26411	NA	0502-0000-0032-0024	0.0014906
7.27253	NA	0502-0000-0030-0024	0.000613884
7.27253	NA	0502-0000-0032-0024	0.00148418
7.28094	NA	0502-0000-0030-0024	0.000609816
7.28094	NA	0502-0000-0032-0024	0.00147669
7.28936	NA	0502-0000-0030-0024	0.000606382
7.28936	NA	0502-0000-0032-0024	0.00146883
7.29778	NA	0502-0000-0030-0024	0.000603263
7.29778	NA	0502-0000-0032-0024	0.00146301
7.3062	NA	0502-0000-0030-0024	0.000600837
7.3062	NA	0502-0000-0032-0024	0.00145786
7.31461	NA	0502-0000-0030-0024	0.000599608
7.31461	NA	0502-0000-0032-0024	0.00145184
7.32303	NA	0502-0000-0030-0024	0.000599367
7.32303	NA	0502-0000-0032-0024	0.00144506
7.33145	NA	0502-0000-0030-0024	0.000599926
7.33145	NA	0502-0000-0032-0024	0.00143783
7.33987	NA	0502-0000-0030-0024	0.000601731
7.33987	NA	0502-0000-0032-0024	0.00143132
7.34828	NA	0502-0000-0030-0024	0.000605297
7.34828	NA	0502-0000-0032-0024	0.00142699
7.3567	NA	0502-0000-0030-0024	0.00060979
7.3567	NA	0502-0000-0032-0024	0.00142279
7.36512	NA	0502-0000-0030-0024	0.00061438
7.36512	NA	0502-0000-0032-0024	0.00141829
7.37353	NA	0502-0000-0030-0024	0.000618866
7.37353	NA	0502-0000-0032-0024	0.00141342
7.38195	NA	0502-0000-0030-0024	0.000623492
7.38195	NA	0502-0000-0032-0024	0.00140799
7.39037	NA	0502-0000-0030-0024	0.000628287
7.39037	NA	0502-0000-0032-0024	0.00140297
7.39879	NA	0502-0000-0030-0024	0.00063193
7.39879	NA	0502-0000-0032-0024	0.00139863
7.4072	NA	0502-0000-0030-0024	0.000633897
7.4072	NA	0502-0000-0032-0024	0.00139491
7.41562	NA	0502-0000-0030-0024	0.000633904
7.41562	NA	0502-0000-0032-0024	0.0013918
7.42404	NA	0502-0000-0030-0024	0.000632743
7.42404	NA	0502-0000-0032-0024	0.00138881
7.43246	NA	0502-0000-0030-0024	0.000632068
7.43246	NA	0502-0000-0032-0024	0.00138543
7.44087	NA	0502-0000-0030-0024	0.000631437
7.44087	NA	0502-0000-0032-0024	0.00138132
7.44929	NA	0502-0000-0030-0024	0.000630638
7.44929	NA	0502-0000-0032-0024	0.0013752
7.45771	NA	0502-0000-0030-0024	0.00062921
7.45771	NA	0502-0000-0032-0024	0.00136905
7.46612	NA	0502-0000-0030-0024	0.000627137
7.46612	NA	0502-0000-0032-0024	0.00136299
7.47454	NA	0502-0000-0030-0024	0.000625443
7.47454	NA	0502-0000-0032-0024	0.00135689
7.48296	NA	0502-0000-0030-0024	0.000623807
7.48296	NA	0502-0000-0032-0024	0.00135058
7.49138	NA	0502-0000-0030-0024	0.000621518
7.49138	NA	0502-0000-0032-0024	0.0013459
7.49979	NA	0502-0000-0030-0024	0.000618315
7.49979	NA	0502-0000-0032-0024	0.0013435
7.50821	NA	0502-0000-0030-0024	0.000614416
7.50821	NA	0502-0000-0032-0024	0.00134083
7.51663	NA	0502-0000-0030-0024	0.000610803
7.51663	NA	0502-0000-0032-0024	0.00133643
7.52505	NA	0502-0000-0030-0024	0.000607533
7.52505	NA	0502-0000-0032-0024	0.00133128
7.53346	NA	0502-0000-0030-0024	0.000604437
7.53346	NA	0502-0000-0032-0024	0.00132856
7.54188	NA	0502-0000-0030-0024	0.000603359
7.54188	NA	0502-0000-0032-0024	0.00132522
7.5503	NA	0502-0000-0030-0024	0.000604905
7.5503	NA	0502-0000-0032-0024	0.00132113
7.55871	NA	0502-0000-0030-0024	0.000606069
7.55871	NA	0502-0000-0032-0024	0.00131533
7.56713	NA	0502-0000-0030-0024	0.000606629
7.56713	NA	0502-0000-0032-0024	0.00130792
7.57555	NA	0502-0000-0030-0024	0.00060655
7.57555	NA	0502-0000-0032-0024	0.00130253
7.58397	NA	0502-0000-0030-0024	0.000605927
7.58397	NA	0502-0000-0032-0024	0.00129887
7.59238	NA	0502-0000-0030-0024	0.000605104
7.59238	NA	0502-0000-0032-0024	0.00129458
7.6008	NA	0502-0000-0030-0024	0.000604143
7.6008	NA	0502-0000-0032-0024	0.00128933
7.60922	NA	0502-0000-0030-0024	0.000602991
7.60922	NA	0502-0000-0032-0024	0.00128228
7.61764	NA	0502-0000-0030-0024	0.000601545
7.61764	NA	0502-0000-0032-0024	0.00127776
7.62605	NA	0502-0000-0030-0024	0.000599866
7.62605	NA	0502-0000-0032-0024	0.00127455
7.63447	NA	0502-0000-0030-0024	0.00059808
7.63447	NA	0502-0000-0032-0024	0.00127175
7.64289	NA	0502-0000-0030-0024	0.000595891
7.64289	NA	0502-0000-0032-0024	0.00126928
7.6513	NA	0502-0000-0030-0024	0.000591221
7.6513	NA	0502-0000-0032-0024	0.00126719
7.65972	NA	0502-0000-0030-0024	0.000584082
7.65972	NA	0502-0000-0032-0024	0.00126594
7.66814	NA	0502-0000-0030-0024	0.000578993
7.66814	NA	0502-0000-0032-0024	0.00126465
7.67656	NA	0502-0000-0030-0024	0.000575966
7.67656	NA	0502-0000-0032-0024	0.00126331
7.68497	NA	0502-0000-0030-0024	0.00057506
7.68497	NA	0502-0000-0032-0024	0.00126177
7.69339	NA	0502-0000-0030-0024	0.000576477
7.69339	NA	0502-0000-0032-0024	0.00125987
7.70181	NA	0502-0000-0030-0024	0.000578482
7.70181	NA	0502-0000-0032-0024	0.00125702
7.71023	NA	0502-0000-0030-0024	0.000579325
7.71023	NA	0502-0000-0032-0024	0.00125024
7.71864	NA	0502-0000-0030-0024	0.00057764
7.71864	NA	0502-0000-0032-0024	0.00124045
7.72706	NA	0502-0000-0030-0024	0.000572848
7.72706	NA	0502-0000-0032-0024	0.00123417
7.73548	NA	0502-0000-0030-0024	0.000566113
7.73548	NA	0502-0000-0032-0024	0.00123205
7.74389	NA	0502-0000-0030-0024	0.000560486
7.74389	NA	0502-0000-0032-0024	0.00123064
7.75231	NA	0502-0000-0030-0024	0.000555812
7.75231	NA	0502-0000-0032-0024	0.00122966
7.76073	NA	0502-0000-0030-0024	0.000551531
7.76073	NA	0502-0000-0032-0024	0.00122901
7.76915	NA	0502-0000-0030-0024	0.00054726
7.76915	NA	0502-0000-0032-0024	0.001228
7.77756	NA	0502-0000-0030-0024	0.000542367
7.77756	NA	0502-0000-0032-0024	0.0012271
7.78598	NA	0502-0000-0030-0024	0.000536963
7.78598	NA	0502-0000-0032-0024	0.00122818
7.7944	NA	0502-0000-0030-0024	0.000533186
7.7944	NA	0502-0000-0032-0024	0.00122993
7.80282	NA	0502-0000-0030-0024	0.0005312
7.80282	NA	0502-0000-0032-0024	0.00123082
7.81123	NA	0502-0000-0030-0024	0.000529631
7.81123	NA	0502-0000-0032-0024	0.00123016
7.81965	NA	0502-0000-0030-0024	0.000527977
7.81965	NA	0502-0000-0032-0024	0.00122512
7.82807	NA	0502-0000-0030-0024	0.000525663
7.82807	NA	0502-0000-0032-0024	0.00121994
7.83648	NA	0502-0000-0030-0024	0.000522256
7.83648	NA	0502-0000-0032-0024	0.0012148
7.8449	NA	0502-0000-0030-0024	0.000516194
7.8449	NA	0502-0000-0032-0024	0.00121043
7.85332	NA	0502-0000-0030-0024	0.000509174
7.85332	NA	0502-0000-0032-0024	0.00120663
7.86174	NA	0502-0000-0030-0024	0.000506165
7.86174	NA	0502-0000-0032-0024	0.00120282
7.87015	NA	0502-0000-0030-0024	0.000506428
7.87015	NA	0502-0000-0032-0024	0.00119884
7.87857	NA	0502-0000-0030-0024	0.000507345
7.87857	NA	0502-0000-0032-0024	0.00119435
7.88699	NA	0502-0000-0030-0024	0.000508125
7.88699	NA	0502-0000-0032-0024	0.00118769
7.89541	NA	0502-0000-0030-0024	0.000508209
7.89541	NA	0502-0000-0032-0024	0.0011796
7.90382	NA	0502-0000-0030-0024	0.000508129
7.90382	NA	0502-0000-0032-0024	0.00117258
7.91224	NA	0502-0000-0030-0024	0.00050859
7.91224	NA	0502-0000-0032-0024	0.00116793
7.92066	NA	0502-0000-0030-0024	0.00050944
7.92066	NA	0502-0000-0032-0024	0.00116426
7.92907	NA	0502-0000-0030-0024	0.000510264
7.92907	NA	0502-0000-0032-0024	0.00116149
7.93749	NA	0502-0000-0030-0024	0.000510283
7.93749	NA	0502-0000-0032-0024	0.00115867
7.94591	NA	0502-0000-0030-0024	0.000508823
7.94591	NA	0502-0000-0032-0024	0.00115535
7.95433	NA	0502-0000-0030-0024	0.000504442
7.95433	NA	0502-0000-0032-0024	0.00115137
7.96274	NA	0502-0000-0030-0024	0.000496159
7.96274	NA	0502-0000-0032-0024	0.00114584
7.97116	NA	0502-0000-0030-0024	0.000488141
7.97116	NA	0502-0000-0032-0024	0.00113941
7.97958	NA	0502-0000-0030-0024	0.000482757
7.97958	NA	0502-0000-0032-0024	0.00113289
7.988	NA	0502-0000-0030-0024	0.000477986
7.988	NA	0502-0000-0032-0024	0.0011262
7.99641	NA	0502-0000-0030-0024	0.000473604
7.99641	NA	0502-0000-0032-0024	0.00111916
8.00483	NA	0502-0000-0030-0024	0.0004701
8.00483	NA	0502-0000-0032-0024	0.00111283
8.01325	NA	0502-0000-0030-0024	0.000467844
8.01325	NA	0502-0000-0032-0024	0.00110798
8.02166	NA	0502-0000-0030-0024	0.00046627
8.02166	NA	0502-0000-0032-0024	0.00110455
8.03008	NA	0502-0000-0030-0024	0.000465056
8.03008	NA	0502-0000-0032-0024	0.00110326
8.0385	NA	0502-0000-0030-0024	0.000463839
8.0385	NA	0502-0000-0032-0024	0.00110173
8.04692	NA	0502-0000-0030-0024	0.000462501
8.04692	NA	0502-0000-0032-0024	0.00109988
8.05533	NA	0502-0000-0030-0024	0.000460891
8.05533	NA	0502-0000-0032-0024	0.00109737
8.06375	NA	0502-0000-0030-0024	0.000459215
8.06375	NA	0502-0000-0032-0024	0.00109391
8.07217	NA	0502-0000-0030-0024	0.000457316
8.07217	NA	0502-0000-0032-0024	0.00108844
8.08059	NA	0502-0000-0030-0024	0.00045459
8.08059	NA	0502-0000-0032-0024	0.00108383
8.089	NA	0502-0000-0030-0024	0.000450835
8.089	NA	0502-0000-0032-0024	0.00108129
8.09742	NA	0502-0000-0030-0024	0.000446306
8.09742	NA	0502-0000-0032-0024	0.00107854
8.10584	NA	0502-0000-0030-0024	0.000441611
8.10584	NA	0502-0000-0032-0024	0.0010754
8.11425	NA	0502-0000-0030-0024	0.000436289
8.11425	NA	0502-0000-0032-0024	0.00107076
8.12267	NA	0502-0000-0030-0024	0.000430953
8.12267	NA	0502-0000-0032-0024	0.00106468
8.13109	NA	0502-0000-0030-0024	0.000426494
8.13109	NA	0502-0000-0032-0024	0.00105991
8.13951	NA	0502-0000-0030-0024	0.000422468
8.13951	NA	0502-0000-0032-0024	0.00105572
8.14792	NA	0502-0000-0030-0024	0.000419351
8.14792	NA	0502-0000-0032-0024	0.00105181
8.15634	NA	0502-0000-0030-0024	0.000417438
8.15634	NA	0502-0000-0032-0024	0.0010488
8.16476	NA	0502-0000-0030-0024	0.000416165
8.16476	NA	0502-0000-0032-0024	0.00104575
8.17318	NA	0502-0000-0030-0024	0.000415233
8.17318	NA	0502-0000-0032-0024	0.00104225
8.18159	NA	0502-0000-0030-0024	0.000414065
[truncated: 4,589 more rows]

## Sheet: Panel D legend
conditions:
0502-0000-0030-0024	Gremlin-1 + 0030:HD
0502-0000-0032-0024	Gremlin-1 + 0032:ND

## Sheet: Panel E (heparin polarisation)
Grem1 conc (nM)	Ab	Polarisation (mP)
300	aG1-Ab	164604
100	aG1-Ab	174399
33.3333	aG1-Ab	184861
11.1111	aG1-Ab	162859
3.7037	aG1-Ab	56251
1.23457	aG1-Ab	26218
0.411523	aG1-Ab	19390
0.137174	aG1-Ab	15009
300	aG1-Ab	116788
100	aG1-Ab	144022
33.3333	aG1-Ab	136790
11.1111	aG1-Ab	147410
3.7037	aG1-Ab	52942
1.23457	aG1-Ab	24732
0.411523	aG1-Ab	20091
0.137174	aG1-Ab	NA
300	Iso-Ab	15771
100	Iso-Ab	17227
33.3333	Iso-Ab	16478
11.1111	Iso-Ab	16174
3.7037	Iso-Ab	18479
1.23457	Iso-Ab	17585
0.411523	Iso-Ab	17200
0.137174	Iso-Ab	10368
300	Iso-Ab	16363
100	Iso-Ab	16559
33.3333	Iso-Ab	16542
11.1111	Iso-Ab	16857
3.7037	Iso-Ab	16951
1.23457	Iso-Ab	14732
0.411523	Iso-Ab	13869
0.137174	Iso-Ab	NA
