# Supplementary material for: Evaluation of Gremlin-1 as a therapeutic target in metabolic dysfunction-associated steatohepatitis
Source: eLife. 2024 Oct 3;13:RP95185. doi: 10.7554/eLife.95185 (PMC11449483; doi:10.7554/eLife.95185)
Supplement: Figure 4—figure supplement 1—source data 1. [file elife-95185-fig4-figsupp1-data1.xlsx]

## Sheet: Panel B (%GFPpos cells)
GFP	GREM1
82.7	61

## Sheet: Panel C
Name	lenti	rep	GAPDH	GFP	GREM1	deltaCp_GFP_GAPDH	deltaCp_GREM1_GAPDH
Lx2-GFP-1	GFP	1	15.96	16.595	21.465	-0.635	-5.505
Lx2-GFP-2	GFP	2	15.41	16.59	21.45	-1.18	-6.04
Lx2-GFP-3	GFP	3	15.385	16.535	21.135	-1.15	-5.75
Lx2-GFP-4	GFP	4	15.46	16.845	22.375	-1.385	-6.915
Lx2-GREM1-1	GREM1	1	15.38	16.18	16.675	-0.8	-1.295
Lx2-GREM1-2	GREM1	2	15.515	16.25	16.94	-0.735	-1.425
Lx2-GREM1-3	GREM1	3	15.615	16.305	16.77	-0.69	-1.155
Lx2-GREM1-4	GREM1	4	15.105	16.935	16.92	-1.83	-1.815

## Sheet: Panel D (%GFPpos cells)
Percentage	condition
48.5946	GFP
69.1296	GREM1
28.1081	GFP
63.6687	GREM1
14.5315	GFP
37.8268	GREM1

## Sheet: Panel E
sample	lenti	GAPDH	GFP	GREM1	GFP_delta	GREM1_delta
1-2	GFP	15.3718	16.8153	18.5225	-1.44355	-3.15069
1-5	GREM1	15.5195	14.8063	15.2618	0.713208	0.257662
2-2	GFP	15.1412	17.7642	17.653	-2.62303	-2.51185
2-5	GREM1	15.6476	15.7115	15.9625	-0.0638821	-0.314874
3-2	GFP	15.4834	16.8915	17.7055	-1.40809	-2.22209
3-5	GREM1	15.3162	14.6268	15.2094	0.689444	0.106849
