# Supplementary material for: Evaluation of Gremlin-1 as a therapeutic target in metabolic dysfunction-associated steatohepatitis
Source: eLife. 2024 Oct 3;13:RP95185. doi: 10.7554/eLife.95185 (PMC11449483; doi:10.7554/eLife.95185)
Supplement: Figure 4—source data 1. [file elife-95185-fig4-data1.xlsx]

## Sheet: Panel A (-DeltaDeltaCt)
liver	treatment	COL1A1	ACTA2	TIMP1
75-9	untr	0	0	0
75-9	PBS	0.280935	0.0969404	-0.0296248
75-9	TGF	1.03561	1.30562	0.168099
75-9	IMC	0.0963415	-0.166783	-0.0704572
75-9	aG1	0.0308052	-0.233111	-0.302075
75-9	TGF+IMC	0.81102	0.899134	-0.133672
75-9	TGF+aG1	0.884111	1.00219	-0.159906
75-9	DMSO	0.0155559	-0.277041	-0.208937
75-9	ALK5i	-1.01913	-1.02343	-0.0456573
79-1	untr	0	0	0
79-1	PBS	0.130744	0.245196	0.023526
79-1	TGF	0.834249	0.0955134	-0.0354799
79-1	IMC	-0.0633459	-0.195565	-0.0934457
79-1	aG1	-0.044652	-0.0484341	-0.0480627
79-1	TGF+IMC	1.03248	0.522518	-0.126306
79-1	TGF+aG1	1.06442	0.605937	-0.0742867
79-1	DMSO	-0.177784	-0.306976	-0.226236
79-1	ALK5i	-1.39263	-0.805627	-0.160389
80-1	untr	0	0	0
80-1	PBS	-0.0841681	-0.0291054	-0.0735368
80-1	TGF	0.116443	-0.123286	-0.00793629
80-1	IMC	-0.0986895	-0.136001	-0.0378785
80-1	aG1	-0.282238	-0.309978	-0.150579
80-1	TGF+IMC	-0.0983442	-0.266547	-0.0831955
80-1	TGF+aG1	0.00108542	-0.26427	0.0457382
80-1	DMSO	-0.148637	-0.196034	-0.0448474
80-1	ALK5i	-0.652888	-0.199514	-0.130734

## Sheet: Panel B (-DeltaDeltaCt)
liver	treatment	COL1A1	ACTA2	TIMP1
75-9	untr	0	0	0
75-9	PBS	0.099017	0.0892167	-0.37038
75-9	TGF	1.05531	1.07204	0.838943
75-9	TGF+IMC	0.992301	-0.184698	0.338702
75-9	TGF+aG1	1.17541	0.119842	0.358269
75-9	IMC	0.494666	-0.0769297	-0.0935099
75-9	aG1	0.445685	-0.0771232	-0.111427
75-9	DMSO	0.495751	-0.0707044	-0.23805
75-9	ALK5i	-0.225558	-0.0838045	-0.630001
79-1	untr	0	0	0
79-1	PBS	-0.0841188	-0.0649843	-0.129403
79-1	TGF	0.800504	0.694904	0.883496
79-1	TGF+IMC	0.925111	0.669226	0.785767
79-1	TGF+aG1	0.996223	0.667959	0.899403
79-1	IMC	0.187101	0.0147354	0.0420113
79-1	aG1	0.0379105	-0.0493269	-0.0215193
79-1	DMSO	-0.083223	-0.0773254	-0.0727531
79-1	ALK5i	-0.538621	-0.0992134	-0.492472
80-1	untr	0	0	0
80-1	PBS	0.0489375	-0.0193298	-0.0418691
80-1	TGF	-0.0425965	-0.382048	0.0055452
80-1	TGF+IMC	0.162423	0.124348	0.121596
80-1	TGF+aG1	-0.21241	-0.180526	-0.235136
80-1	IMC	-0.058635	-0.190603	-0.15217
80-1	aG1	0.406614	-0.357645	0.114787
80-1	DMSO	-0.0882879	-0.301949	-0.12966
80-1	ALK5i	-1.06202	0.033478	-0.389355

## Sheet: Panel C (-DeltaDeltaCt)
lenti	TGF	COL1A1	ACTA2	TIMP1
GFP	control	0	0	0
GFP	TGFß1	0.51946	0.755351	0.158228
GREM1	control	0.18264	-0.109531	0.198248
GREM1	TGFß1	0.463073	0.921525	0.216407
GFP	control	0	0	0
GFP	TGFß1	0.246877	0.0886216	0.132578
GREM1	control	-0.148962	-0.0862715	-0.131232
GREM1	TGFß1	0.318793	0.233099	0.0423426
GFP	control	0	0	0
GFP	TGFß1	0.393468	0.138249	0.121924
GREM1	control	-0.0968094	-0.26675	0.0540168
GREM1	TGFß1	0.189655	-0.162702	0.219752

## Sheet: Panel D (-DeltaDeltaCt)
lenti	TGF	COL1A1	ACTA2	TIMP1	CCL2	LOX	LOXL1
GFP	control	0	0	0	0	0	0
GFP	TGFß1	2.11	0.605	1.065	2.07	0.875	-0.075
GREM1	control	0.245	-0.055	-0.1	0.88	0.355	0.115
GREM1	TGFß1	1.955	0.31	0.845	2.21	0.59	-0.22
GFP	control	0	0	0	0	0	0
GFP	TGFß1	1.47	0.1	1.72	2.385	0.48	-0.03
GREM1	control	-0.04	-0.025	0.1	0.44	0.25	0.1
GREM1	TGFß1	1.77	3.55271e-15	1.935	2.965	0.705	-0.09
GFP	control	0	0	0	0	0	0
GFP	TGFß1	2.09578	0.944782	1.78612	3.21253	1.42938	0.168896
GREM1	control	0.0855375	0.137532	0.164585	1.12254	0.324632	0.23991
GREM1	TGFß1	2.16801	0.861297	1.99695	3.67013	1.49307	0.0464152

## Sheet: Panel E (-DeltaDeltaCt)
lenti	TGF	BMP4	BMP7	BMPR1A	BMPR1B	BMPR2	ID1	ID2	INHBA	INHBB	SMAD1	SMAD2	SMAD3	SMAD4	SMAD5	SMAD6	SMAD7	SMAD9
GFP	control	0	0	0	0	0	0	0	0	0	0	0	0	0	0	0	0	0
GFP	TGFß1	-1.635	-0.185777	-0.195	1.62	0.835	0.398459	-0.422515	0.908502	-0.035	0.346071	-0.207192	-0.825	-0.189277	-0.025	-0.535	2.385	-0.378493
GREM1	control	-0.315	2.25035	-0.13	0.415	-0.2	0.729111	0.645228	0.960842	-1.42	0.515849	-0.189783	-0.21	-0.17737	-0.14	-0.6	-0.325	-0.302426
GREM1	TGFß1	-2.315	1.34644	-0.475	1.535	0.655	1.24943	0.659184	1.70291	-1.88	0.81229	0.0228428	-1.49	-0.0502676	-0.405	-1.22	2.25	-0.542857
GFP	control	0	0	0	0	0	0	0	0	0	0	0	0	0	0	0	0	0
GFP	TGFß1	-1.09099	0.035	-0.00630547	1.56757	0.825903	0.791148	1.00618	1.57001	-0.235	0.436798	0.025172	-0.290361	0.00377284	0.110855	-0.191467	1.70624	-0.0885417
GREM1	control	-0.23158	2.58	0.00388513	0.899584	0.0589481	-0.372468	-0.269525	0.0458425	-1.045	0.265209	-0.0844534	-0.103841	0.0258262	0.0007172	-0.452766	-0.296128	-0.0757309
GREM1	TGFß1	-1.31926	1.9	0.0537285	2.12026	1.0461	1.07385	0.811762	1.36119	-1.225	0.525441	0.0718624	-0.554947	0.0389508	0.168575	-0.394364	1.89904	-0.278604
GFP	control	0	0	0	0	0	0	0	0	0	0	0	0	0	0	0	0	0
GFP	TGFß1	-2.32017	0.0207516	0.0837319	2.4148	1.35269	1.29399	0.67331	2.39302	0.215243	0.510893	0.214019	-0.59018	0.0577619	0.355483	-0.474457	2.81261	-0.0804619
GREM1	control	-0.292593	0.688372	0.0685531	1.07008	0.065686	-0.537627	-0.607305	-0.0902685	-1.43526	0.454735	-0.0895982	0.0654255	-0.00108769	0.00160276	-0.509866	-0.445978	-0.031215
GREM1	TGFß1	-2.56548	-0.0666674	0.0982973	2.8653	1.55799	1.58915	0.897772	2.84325	-1.07516	0.68927	0.136334	-0.73672	0.0258782	0.332291	-0.723844	2.56086	-0.251689
