# Supplementary material for: Evaluation of Gremlin-1 as a therapeutic target in metabolic dysfunction-associated steatohepatitis
Source: eLife. 2024 Oct 3;13:RP95185. doi: 10.7554/eLife.95185 (PMC11449483; doi:10.7554/eLife.95185)
Supplement: Figure 5—figure supplement 1—source data 1. [file elife-95185-fig5-figsupp1-data1.xlsx]

## Sheet: Tabelle1
Animal	Ab	Dose	days of treatment	Signal
11	Isotype	25 mg/mL	0	218
11	Isotype	25 mg/mL	3	265
11	Isotype	25 mg/mL	6	140
11	Isotype	25 mg/mL	10	171
11	Isotype	25 mg/mL	17	241
11	Isotype	25 mg/mL	24	218
11	Isotype	25 mg/mL	31	280
11	Isotype	25 mg/mL	38	218
11	Isotype	25 mg/mL	43	311
16	Isotype	25 mg/mL	0	4048
16	Isotype	25 mg/mL	3	3751
16	Isotype	25 mg/mL	6	3026
16	Isotype	25 mg/mL	10	3416
16	Isotype	25 mg/mL	17	2394
16	Isotype	25 mg/mL	24	2300
16	Isotype	25 mg/mL	31	2924
16	Isotype	25 mg/mL	38	2215
16	Isotype	25 mg/mL	43	2207
19	Isotype	25 mg/mL	0	1021
19	Isotype	25 mg/mL	17	272
19	Isotype	25 mg/mL	24	265
19	Isotype	25 mg/mL	31	366
19	Isotype	25 mg/mL	38	530
19	Isotype	25 mg/mL	43	865
21	Isotype	25 mg/mL	0	218
21	Isotype	25 mg/mL	3	311
21	Isotype	25 mg/mL	6	202
21	Isotype	25 mg/mL	10	218
21	Isotype	25 mg/mL	17	226
21	Isotype	25 mg/mL	24	233
21	Isotype	25 mg/mL	31	249
21	Isotype	25 mg/mL	38	280
21	Isotype	25 mg/mL	43	350
22	Isotype	25 mg/mL	0	226
22	Isotype	25 mg/mL	17	257
22	Isotype	25 mg/mL	24	202
22	Isotype	25 mg/mL	31	226
22	Isotype	25 mg/mL	38	194
22	Isotype	25 mg/mL	43	265
28	Isotype	25 mg/mL	0	335
28	Isotype	25 mg/mL	3	233
28	Isotype	25 mg/mL	6	265
28	Isotype	25 mg/mL	10	249
28	Isotype	25 mg/mL	17	405
28	Isotype	25 mg/mL	24	233
28	Isotype	25 mg/mL	31	265
28	Isotype	25 mg/mL	38	171
28	Isotype	25 mg/mL	43	327
29	Isotype	25 mg/mL	0	343
29	Isotype	25 mg/mL	3	1037
29	Isotype	25 mg/mL	6	522
29	Isotype	25 mg/mL	10	389
29	Isotype	25 mg/mL	17	538
29	Isotype	25 mg/mL	24	506
29	Isotype	25 mg/mL	31	436
29	Isotype	25 mg/mL	38	444
29	Isotype	25 mg/mL	43	561
36	Isotype	25 mg/mL	0	194
36	Isotype	25 mg/mL	3	233
36	Isotype	25 mg/mL	6	171
36	Isotype	25 mg/mL	10	210
36	Isotype	25 mg/mL	17	194
36	Isotype	25 mg/mL	24	187
36	Isotype	25 mg/mL	31	218
36	Isotype	25 mg/mL	38	210
36	Isotype	25 mg/mL	43	140
38	Isotype	25 mg/mL	0	187
38	Isotype	25 mg/mL	3	210
38	Isotype	25 mg/mL	6	210
38	Isotype	25 mg/mL	10	179
38	Isotype	25 mg/mL	17	179
38	Isotype	25 mg/mL	24	210
38	Isotype	25 mg/mL	31	241
38	Isotype	25 mg/mL	38	280
38	Isotype	25 mg/mL	43	155
42	Isotype	25 mg/mL	0	8384
42	Isotype	25 mg/mL	3	4555
42	Isotype	25 mg/mL	6	1341
42	Isotype	25 mg/mL	10	1357
42	Isotype	25 mg/mL	17	967
42	Isotype	25 mg/mL	24	467
42	Isotype	25 mg/mL	31	428
42	Isotype	25 mg/mL	38	506
42	Isotype	25 mg/mL	43	116
49	Isotype	25 mg/mL	0	249
49	Isotype	25 mg/mL	3	233
49	Isotype	25 mg/mL	6	218
49	Isotype	25 mg/mL	10	210
49	Isotype	25 mg/mL	17	311
49	Isotype	25 mg/mL	24	288
49	Isotype	25 mg/mL	31	241
49	Isotype	25 mg/mL	38	311
49	Isotype	25 mg/mL	43	257
66	Isotype	25 mg/mL	0	187
66	Isotype	25 mg/mL	3	280
66	Isotype	25 mg/mL	6	155
66	Isotype	25 mg/mL	10	335
66	Isotype	25 mg/mL	17	382
66	Isotype	25 mg/mL	24	311
66	Isotype	25 mg/mL	31	249
66	Isotype	25 mg/mL	38	335
66	Isotype	25 mg/mL	43	109
80	Isotype	25 mg/mL	0	171
80	Isotype	25 mg/mL	3	288
80	Isotype	25 mg/mL	6	233
80	Isotype	25 mg/mL	10	288
80	Isotype	25 mg/mL	17	202
80	Isotype	25 mg/mL	24	187
80	Isotype	25 mg/mL	31	210
80	Isotype	25 mg/mL	38	187
80	Isotype	25 mg/mL	43	218
82	Isotype	25 mg/mL	0	226
82	Isotype	25 mg/mL	3	194
82	Isotype	25 mg/mL	6	233
82	Isotype	25 mg/mL	10	194
82	Isotype	25 mg/mL	17	452
82	Isotype	25 mg/mL	24	280
82	Isotype	25 mg/mL	31	296
82	Isotype	25 mg/mL	38	280
82	Isotype	25 mg/mL	43	397
98	Isotype	25 mg/mL	0	311
98	Isotype	25 mg/mL	3	187
98	Isotype	25 mg/mL	6	226
98	Isotype	25 mg/mL	10	0
98	Isotype	25 mg/mL	17	0
98	Isotype	25 mg/mL	24	0
98	Isotype	25 mg/mL	31	296
98	Isotype	25 mg/mL	38	343
98	Isotype	25 mg/mL	43	327
111	Isotype	25 mg/mL	0	233
111	Isotype	25 mg/mL	3	288
111	Isotype	25 mg/mL	6	272
111	Isotype	25 mg/mL	10	1840
111	Isotype	25 mg/mL	17	241
111	Isotype	25 mg/mL	24	155
111	Isotype	25 mg/mL	31	179
111	Isotype	25 mg/mL	38	163
111	Isotype	25 mg/mL	43	116
112	Isotype	25 mg/mL	0	226
112	Isotype	25 mg/mL	3	233
112	Isotype	25 mg/mL	6	233
112	Isotype	25 mg/mL	10	358
112	Isotype	25 mg/mL	17	171
112	Isotype	25 mg/mL	24	148
112	Isotype	25 mg/mL	31	155
112	Isotype	25 mg/mL	38	218
112	Isotype	25 mg/mL	43	93
117	Isotype	25 mg/mL	0	272
117	Isotype	25 mg/mL	3	179
117	Isotype	25 mg/mL	6	210
117	Isotype	25 mg/mL	10	0
117	Isotype	25 mg/mL	17	233
117	Isotype	25 mg/mL	24	2893
117	Isotype	25 mg/mL	31	1146
117	Isotype	25 mg/mL	38	428
117	Isotype	25 mg/mL	43	77
1	361	25 mg/mL	0	3197
1	361	25 mg/mL	3	3299
1	361	25 mg/mL	6	9242
1	361	25 mg/mL	10	4781
7	361	25 mg/mL	0	740
7	361	25 mg/mL	3	296
7	361	25 mg/mL	6	210
7	361	25 mg/mL	10	257
7	361	25 mg/mL	17	218
7	361	25 mg/mL	24	226
7	361	25 mg/mL	31	202
7	361	25 mg/mL	38	218
7	361	25 mg/mL	43	226
9	361	25 mg/mL	0	202
9	361	25 mg/mL	3	210
9	361	25 mg/mL	6	187
9	361	25 mg/mL	10	194
9	361	25 mg/mL	17	194
9	361	25 mg/mL	24	233
9	361	25 mg/mL	31	272
9	361	25 mg/mL	38	171
9	361	25 mg/mL	43	265
13	361	25 mg/mL	0	218
13	361	25 mg/mL	3	148
13	361	25 mg/mL	6	296
13	361	25 mg/mL	10	148
13	361	25 mg/mL	17	257
13	361	25 mg/mL	24	163
13	361	25 mg/mL	31	226
13	361	25 mg/mL	38	280
13	361	25 mg/mL	43	194
27	361	25 mg/mL	0	226
27	361	25 mg/mL	3	257
27	361	25 mg/mL	6	265
27	361	25 mg/mL	10	202
27	361	25 mg/mL	17	218
27	361	25 mg/mL	24	210
27	361	25 mg/mL	31	265
27	361	25 mg/mL	38	382
27	361	25 mg/mL	43	389
37	361	25 mg/mL	0	218
37	361	25 mg/mL	3	124
37	361	25 mg/mL	6	194
37	361	25 mg/mL	10	226
37	361	25 mg/mL	17	171
37	361	25 mg/mL	24	226
37	361	25 mg/mL	31	304
37	361	25 mg/mL	38	241
37	361	25 mg/mL	43	257
39	361	25 mg/mL	0	218
39	361	25 mg/mL	3	171
39	361	25 mg/mL	6	187
39	361	25 mg/mL	10	187
39	361	25 mg/mL	17	171
39	361	25 mg/mL	24	187
39	361	25 mg/mL	31	179
39	361	25 mg/mL	38	155
39	361	25 mg/mL	43	210
54	361	25 mg/mL	0	218
54	361	25 mg/mL	3	296
54	361	25 mg/mL	6	319
54	361	25 mg/mL	10	241
54	361	25 mg/mL	17	194
54	361	25 mg/mL	24	194
54	361	25 mg/mL	31	202
54	361	25 mg/mL	38	210
54	361	25 mg/mL	43	70
68	361	25 mg/mL	0	226
68	361	25 mg/mL	3	187
68	361	25 mg/mL	6	226
68	361	25 mg/mL	10	272
68	361	25 mg/mL	17	343
68	361	25 mg/mL	24	218
68	361	25 mg/mL	31	233
68	361	25 mg/mL	38	241
68	361	25 mg/mL	43	109
71	361	25 mg/mL	0	202
71	361	25 mg/mL	3	233
71	361	25 mg/mL	6	218
71	361	25 mg/mL	10	210
71	361	25 mg/mL	17	272
71	361	25 mg/mL	24	179
71	361	25 mg/mL	31	233
71	361	25 mg/mL	38	233
71	361	25 mg/mL	43	109
94	361	25 mg/mL	0	194
94	361	25 mg/mL	3	171
94	361	25 mg/mL	6	210
94	361	25 mg/mL	10	171
94	361	25 mg/mL	17	187
94	361	25 mg/mL	24	202
94	361	25 mg/mL	31	218
94	361	25 mg/mL	38	241
94	361	25 mg/mL	43	296
99	361	25 mg/mL	0	226
99	361	25 mg/mL	3	233
99	361	25 mg/mL	6	171
99	361	25 mg/mL	10	187
99	361	25 mg/mL	17	187
99	361	25 mg/mL	24	257
99	361	25 mg/mL	31	226
99	361	25 mg/mL	38	218
99	361	25 mg/mL	43	272
105	361	25 mg/mL	0	842
105	361	25 mg/mL	3	584
105	361	25 mg/mL	6	405
105	361	25 mg/mL	10	226
105	361	25 mg/mL	17	366
105	361	25 mg/mL	24	374
105	361	25 mg/mL	31	327
105	361	25 mg/mL	38	647
105	361	25 mg/mL	43	241
107	361	25 mg/mL	0	257
107	361	25 mg/mL	3	397
107	361	25 mg/mL	6	358
107	361	25 mg/mL	10	0
107	361	25 mg/mL	17	0
107	361	25 mg/mL	24	0
107	361	25 mg/mL	31	335
107	361	25 mg/mL	38	327
107	361	25 mg/mL	43	132
120	361	25 mg/mL	0	358
120	361	25 mg/mL	3	389
120	361	25 mg/mL	6	951
120	361	25 mg/mL	10	179
120	361	25 mg/mL	17	561
120	361	25 mg/mL	24	413
120	361	25 mg/mL	31	584
120	361	25 mg/mL	38	779
120	361	25 mg/mL	43	109
14	2021	25 mg/mL	0	249
14	2021	25 mg/mL	3	2090
14	2021	25 mg/mL	6	967
14	2021	25 mg/mL	10	748
14	2021	25 mg/mL	17	998
14	2021	25 mg/mL	24	1029
18	2021	25 mg/mL	0	218
18	2021	25 mg/mL	3	1910
18	2021	25 mg/mL	6	1138
18	2021	25 mg/mL	10	2698
18	2021	25 mg/mL	17	1325
18	2021	25 mg/mL	24	1208
18	2021	25 mg/mL	31	1123
18	2021	25 mg/mL	38	1458
18	2021	25 mg/mL	43	865
51	2021	25 mg/mL	0	218
51	2021	25 mg/mL	3	2940
51	2021	25 mg/mL	6	1247
51	2021	25 mg/mL	10	1193
51	2021	25 mg/mL	17	2043
51	2021	25 mg/mL	24	2059
51	2021	25 mg/mL	31	3143
51	2021	25 mg/mL	38	2620
51	2021	25 mg/mL	43	194
53	2021	25 mg/mL	0	202
53	2021	25 mg/mL	3	1903
53	2021	25 mg/mL	6	928
53	2021	25 mg/mL	10	1076
53	2021	25 mg/mL	17	1809
53	2021	25 mg/mL	24	1107
53	2021	25 mg/mL	31	2168
53	2021	25 mg/mL	38	2839
53	2021	25 mg/mL	43	171
57	2021	25 mg/mL	0	249
57	2021	25 mg/mL	3	2464
57	2021	25 mg/mL	6	1068
57	2021	25 mg/mL	10	943
57	2021	25 mg/mL	17	1481
57	2021	25 mg/mL	24	896
57	2021	25 mg/mL	31	1942
57	2021	25 mg/mL	38	967
57	2021	25 mg/mL	43	272
58	2021	25 mg/mL	0	296
58	2021	25 mg/mL	3	1536
58	2021	25 mg/mL	6	631
58	2021	25 mg/mL	10	1497
58	2021	25 mg/mL	17	2316
58	2021	25 mg/mL	24	1942
58	2021	25 mg/mL	31	1216
58	2021	25 mg/mL	38	1068
58	2021	25 mg/mL	43	77
60	2021	25 mg/mL	0	538
60	2021	25 mg/mL	3	1965
60	2021	25 mg/mL	6	740
60	2021	25 mg/mL	10	327
60	2021	25 mg/mL	17	1193
60	2021	25 mg/mL	24	1341
60	2021	25 mg/mL	31	1060
60	2021	25 mg/mL	38	1957
60	2021	25 mg/mL	43	109
61	2021	25 mg/mL	0	233
61	2021	25 mg/mL	3	1684
61	2021	25 mg/mL	6	452
61	2021	25 mg/mL	10	756
61	2021	25 mg/mL	17	1497
61	2021	25 mg/mL	24	1357
61	2021	25 mg/mL	31	2098
61	2021	25 mg/mL	38	1614
61	2021	25 mg/mL	43	140
63	2021	25 mg/mL	0	327
63	2021	25 mg/mL	3	3728
63	2021	25 mg/mL	6	1232
63	2021	25 mg/mL	10	1715
63	2021	25 mg/mL	17	2956
63	2021	25 mg/mL	24	2160
63	2021	25 mg/mL	31	1435
63	2021	25 mg/mL	38	1333
63	2021	25 mg/mL	43	70
79	2021	25 mg/mL	0	1669
79	2021	25 mg/mL	3	2285
79	2021	25 mg/mL	6	4180
79	2021	25 mg/mL	10	2285
79	2021	25 mg/mL	17	6052
79	2021	25 mg/mL	24	5405
79	2021	25 mg/mL	31	6840
79	2021	25 mg/mL	38	4445
79	2021	25 mg/mL	43	4414
91	2021	25 mg/mL	0	444
91	2021	25 mg/mL	3	2191
91	2021	25 mg/mL	6	896
91	2021	25 mg/mL	10	1520
91	2021	25 mg/mL	17	1598
91	2021	25 mg/mL	24	1099
91	2021	25 mg/mL	31	850
91	2021	25 mg/mL	38	701
91	2021	25 mg/mL	43	1271
92	2021	25 mg/mL	0	218
92	2021	25 mg/mL	3	2768
92	2021	25 mg/mL	6	1232
92	2021	25 mg/mL	10	2768
92	2021	25 mg/mL	17	2823
92	2021	25 mg/mL	24	1583
92	2021	25 mg/mL	31	1442
92	2021	25 mg/mL	38	1349
92	2021	25 mg/mL	43	1037
100	2021	25 mg/mL	0	366
100	2021	25 mg/mL	3	1747
100	2021	25 mg/mL	6	1255
100	2021	25 mg/mL	10	280
100	2021	25 mg/mL	17	1957
100	2021	25 mg/mL	24	6988
100	2021	25 mg/mL	31	3993
100	2021	25 mg/mL	38	4438
100	2021	25 mg/mL	43	3564
101	2021	25 mg/mL	0	218
101	2021	25 mg/mL	3	1552
101	2021	25 mg/mL	6	904
101	2021	25 mg/mL	10	1747
101	2021	25 mg/mL	17	1910
101	2021	25 mg/mL	24	1622
101	2021	25 mg/mL	31	3619
101	2021	25 mg/mL	38	350
101	2021	25 mg/mL	43	358
109	2021	25 mg/mL	0	592
109	2021	25 mg/mL	3	1840
109	2021	25 mg/mL	6	1232
109	2021	25 mg/mL	10	327
109	2021	25 mg/mL	17	1294
109	2021	25 mg/mL	24	920
109	2021	25 mg/mL	31	967
109	2021	25 mg/mL	38	1060
109	2021	25 mg/mL	43	85
