# Supplementary material for: Evaluation of Gremlin-1 as a therapeutic target in metabolic dysfunction-associated steatohepatitis
Source: eLife. 2024 Oct 3;13:RP95185. doi: 10.7554/eLife.95185 (PMC11449483; doi:10.7554/eLife.95185)
Supplement: Figure 5—figure supplement 2—source data 1. [file elife-95185-fig5-figsupp2-data1.xlsx]

## Sheet: Panel A
Treatment (Dose)	Animal	Collagen1 (Area%)
None	134	1.66184
None	135	1.35226
None	136	1.55529
None	137	4.41294
None	138	3.96977
Isotype ctrl	11	8.52809
Isotype ctrl	16	10.4198
Isotype ctrl	19	15.7585
Isotype ctrl	21	10.1669
Isotype ctrl	22	7.49615
Isotype ctrl	28	9.8136
Isotype ctrl	29	9.61333
Isotype ctrl	36	12.1763
Isotype ctrl	38	13.9226
Isotype ctrl	42	9.96537
Isotype ctrl	49	14.4923
Isotype ctrl	66	8.06661
Isotype ctrl	80	7.92188
Isotype ctrl	82	14.2894
Isotype ctrl	111	8.58148
Isotype ctrl	112	13.2589
Isotype ctrl	117	10.8823
0361 (25 mg/mL)	7	7.00453
0361 (25 mg/mL)	9	14.3214
0361 (25 mg/mL)	13	10.2137
0361 (25 mg/mL)	27	8.22578
0361 (25 mg/mL)	37	8.52627
0361 (25 mg/mL)	39	10.1909
0361 (25 mg/mL)	54	7.77261
0361 (25 mg/mL)	68	15.2869
0361 (25 mg/mL)	71	8.84016
0361 (25 mg/mL)	94	13.8332
0361 (25 mg/mL)	99	10.3161
0361 (25 mg/mL)	105	9.2388
0361 (25 mg/mL)	120	12.6205
0361 (2.5 mg/mL)	3	7.56605
0361 (2.5 mg/mL)	31	12.5106
0361 (2.5 mg/mL)	33	7.52883
0361 (2.5 mg/mL)	34	8.89085
0361 (2.5 mg/mL)	35	11.5527
0361 (2.5 mg/mL)	65	11.6342
0361 (2.5 mg/mL)	67	9.40631
0361 (2.5 mg/mL)	77	7.73836
0361 (2.5 mg/mL)	84	14.9154
0361 (2.5 mg/mL)	86	11.9665
0361 (2.5 mg/mL)	93	22.9847
0361 (2.5 mg/mL)	97	11.0906
0361 (2.5 mg/mL)	118	9.39331
0361 (1 mg/mL)	6	11.9504
0361 (1 mg/mL)	23	12.1913
0361 (1 mg/mL)	25	8.02963
0361 (1 mg/mL)	43	18.1137
0361 (1 mg/mL)	45	12.5036
0361 (1 mg/mL)	47	8.16511
0361 (1 mg/mL)	56	3.79453
0361 (1 mg/mL)	59	11.3019
0361 (1 mg/mL)	62	22.283
0361 (1 mg/mL)	70	14.8992
0361 (1 mg/mL)	73	11.0501
0361 (1 mg/mL)	88	12.2966
0361 (1 mg/mL)	95	16.4592
0361 (1 mg/mL)	106	15.4238
0361 (1 mg/mL)	122	10.8965
2021 (25 mg/mL)	18	15.5834
2021 (25 mg/mL)	51	18.2789
2021 (25 mg/mL)	53	19.229
2021 (25 mg/mL)	57	9.13739
2021 (25 mg/mL)	58	13.6745
2021 (25 mg/mL)	60	11.2541
2021 (25 mg/mL)	61	14.0339
2021 (25 mg/mL)	63	9.15668
2021 (25 mg/mL)	79	11.7017
2021 (25 mg/mL)	91	12.6099
2021 (25 mg/mL)	92	16.6882
2021 (25 mg/mL)	100	13.24
2021 (25 mg/mL)	109	12.4825
2021 (2.5 mg/mL)	2	14.2569
2021 (2.5 mg/mL)	4	10.3414
2021 (2.5 mg/mL)	10	21.78
2021 (2.5 mg/mL)	20	7.81034
2021 (2.5 mg/mL)	40	8.04875
2021 (2.5 mg/mL)	52	12.8009
2021 (2.5 mg/mL)	69	6.72421
2021 (2.5 mg/mL)	74	5.33597
2021 (2.5 mg/mL)	75	13.5346
2021 (2.5 mg/mL)	85	29.1619
2021 (2.5 mg/mL)	90	10.2013
2021 (2.5 mg/mL)	102	15.3161
2021 (2.5 mg/mL)	113	19.8059
2021 (2.5 mg/mL)	119	7.2109601788963396
2021 (2.5 mg/mL)	121	14.9271
2021 (1mg/mL)	5	16.1436
2021 (1mg/mL)	8	14.2294
2021 (1mg/mL)	12	8.40751
2021 (1mg/mL)	44	9.41506
2021 (1mg/mL)	46	15.2094
2021 (1mg/mL)	64	4.90229
2021 (1mg/mL)	76	7.85584
2021 (1mg/mL)	87	14.8495
2021 (1mg/mL)	103	11.2873
2021 (1mg/mL)	108	16.7234
2021 (1mg/mL)	110	14.8945
2021 (1mg/mL)	114	21.1108
2021 (1mg/mL)	115	14.1012
2021 (1mg/mL)	116	18.0263
2021 (0.25mg/mL)	15	12.75
2021 (0.25mg/mL)	17	12.6636
2021 (0.25mg/mL)	24	7.00915
2021 (0.25mg/mL)	26	14.0491
2021 (0.25mg/mL)	30	14.4277
2021 (0.25mg/mL)	32	19.2992
2021 (0.25mg/mL)	41	7.18258
2021 (0.25mg/mL)	48	8.2837
2021 (0.25mg/mL)	50	16.4124
2021 (0.25mg/mL)	72	10.3545
2021 (0.25mg/mL)	81	10.6894
2021 (0.25mg/mL)	83	11.4658
2021 (0.25mg/mL)	89	23.5783
2021 (0.25mg/mL)	96	30.9417
2021 (0.25mg/mL)	123	16.1181

## Sheet: Panel B
Treatment (Dose)	Animal	alpha-SMA (Area%)
None	134	0.732132
None	135	0.915871
None	136	0.653913
None	137	0.768029
None	138	1.05678
Isotype ctrl	11	14.4157
Isotype ctrl	16	12.3085
Isotype ctrl	19	20.3605
Isotype ctrl	21	15.2761
Isotype ctrl	22	12.1462
Isotype ctrl	28	13.3596
Isotype ctrl	29	12.6017
Isotype ctrl	36	12.3439
Isotype ctrl	38	16.4011
Isotype ctrl	42	13.2068
Isotype ctrl	49	18.3324
Isotype ctrl	66	11.3056
Isotype ctrl	80	7.37412
Isotype ctrl	82	12.8318
Isotype ctrl	111	9.43891
Isotype ctrl	112	11.5706
Isotype ctrl	117	10.2085
0361 (25 mg/mL)	7	13.4591
0361 (25 mg/mL)	9	17.706
0361 (25 mg/mL)	13	11.5952
0361 (25 mg/mL)	27	9.56474
0361 (25 mg/mL)	37	11.9692
0361 (25 mg/mL)	39	10.6929
0361 (25 mg/mL)	54	7.4936
0361 (25 mg/mL)	68	11.2573
0361 (25 mg/mL)	71	13.8193
0361 (25 mg/mL)	94	13.642
0361 (25 mg/mL)	99	11.4281
0361 (25 mg/mL)	105	10.7251
0361 (25 mg/mL)	120	15.9616
0361 (2.5 mg/mL)	3	11.8471
0361 (2.5 mg/mL)	31	14.8447
0361 (2.5 mg/mL)	33	10.7321
0361 (2.5 mg/mL)	34	13.3488
0361 (2.5 mg/mL)	35	16.3178
0361 (2.5 mg/mL)	65	10.6311
0361 (2.5 mg/mL)	67	11.8134
0361 (2.5 mg/mL)	77	10.3696
0361 (2.5 mg/mL)	84	14.0122
0361 (2.5 mg/mL)	86	11.4742
0361 (2.5 mg/mL)	93	16.4543
0361 (2.5 mg/mL)	97	12.2598
0361 (2.5 mg/mL)	118	12.8698
0361 (1 mg/mL)	6	13.855
0361 (1 mg/mL)	23	15.9646
0361 (1 mg/mL)	25	13.9965
0361 (1 mg/mL)	43	14.128
0361 (1 mg/mL)	45	15.082
0361 (1 mg/mL)	47	10.4198
0361 (1 mg/mL)	56	5.70165
0361 (1 mg/mL)	59	11.507
0361 (1 mg/mL)	62	16.4235
0361 (1 mg/mL)	70	15.884
0361 (1 mg/mL)	73	10.4009
0361 (1 mg/mL)	88	14.0957
0361 (1 mg/mL)	95	15.8354
0361 (1 mg/mL)	106	15.2246
0361 (1 mg/mL)	122	12.9445
2021 (25 mg/mL)	18	17.461
2021 (25 mg/mL)	51	14.7581
2021 (25 mg/mL)	53	13.0901
2021 (25 mg/mL)	57	8.12827
2021 (25 mg/mL)	58	11.4304
2021 (25 mg/mL)	60	13.6507
2021 (25 mg/mL)	61	14.8425
2021 (25 mg/mL)	63	11.1417
2021 (25 mg/mL)	79	14.5206
2021 (25 mg/mL)	91	14.7935
2021 (25 mg/mL)	92	16.5054
2021 (25 mg/mL)	100	14.1969
2021 (25 mg/mL)	109	14.1949
2021 (2.5 mg/mL)	2	13.1325
2021 (2.5 mg/mL)	4	8.08234
2021 (2.5 mg/mL)	10	14.8843
2021 (2.5 mg/mL)	20	9.35947
2021 (2.5 mg/mL)	40	12.2203
2021 (2.5 mg/mL)	52	13.401
2021 (2.5 mg/mL)	69	10.3706
2021 (2.5 mg/mL)	74	8.31843
2021 (2.5 mg/mL)	75	11.5221
2021 (2.5 mg/mL)	85	15.5058
2021 (2.5 mg/mL)	90	11.427
2021 (2.5 mg/mL)	102	13.4044
2021 (2.5 mg/mL)	113	13.8676
2021 (2.5 mg/mL)	119	8.496
2021 (2.5 mg/mL)	121	13.2907
2021 (1mg/mL)	5	17.6055
2021 (1mg/mL)	8	14.175
2021 (1mg/mL)	12	15.444
2021 (1mg/mL)	44	10.924
2021 (1mg/mL)	46	13.9804
2021 (1mg/mL)	64	7.60773
2021 (1mg/mL)	76	13.1957
2021 (1mg/mL)	87	17.8739
2021 (1mg/mL)	103	11.7494
2021 (1mg/mL)	108	15.4635
2021 (1mg/mL)	110	13.5424
2021 (1mg/mL)	114	15.9996
2021 (1mg/mL)	115	14.0087
2021 (1mg/mL)	116	14.377
2021 (0.25mg/mL)	15	11.4214
2021 (0.25mg/mL)	17	12.833
2021 (0.25mg/mL)	24	15.1253
2021 (0.25mg/mL)	26	15.4
2021 (0.25mg/mL)	30	14.4152
2021 (0.25mg/mL)	32	15.6298
2021 (0.25mg/mL)	41	8.5231
2021 (0.25mg/mL)	48	10.6969
2021 (0.25mg/mL)	50	15.4871
2021 (0.25mg/mL)	72	9.97065
2021 (0.25mg/mL)	81	11.6168
2021 (0.25mg/mL)	83	9.46732
2021 (0.25mg/mL)	89	16.8047
2021 (0.25mg/mL)	96	18.9302
2021 (0.25mg/mL)	123	17.0484

## Sheet: Panel C
Treatment (Dose)	Animal	CD68 (Area%)
None	134	3.67391
None	135	3.23345
None	136	3.49614
None	137	4.50673
None	138	4.0381
Isotype ctrl	11	12.4335
Isotype ctrl	16	15.7719
Isotype ctrl	19	19.2061
Isotype ctrl	21	15.5143
Isotype ctrl	22	10.227
Isotype ctrl	28	12.7175
Isotype ctrl	29	14.664
Isotype ctrl	36	13.6588
Isotype ctrl	38	13.8444
Isotype ctrl	42	13.1057
Isotype ctrl	49	19.5924
Isotype ctrl	66	12.2798
Isotype ctrl	80	13.4885
Isotype ctrl	82	15.4043
Isotype ctrl	111	13.6571
Isotype ctrl	112	13.8762
Isotype ctrl	117	16.1839
0361 (25 mg/mL)	7	13.995
0361 (25 mg/mL)	9	17.5847
0361 (25 mg/mL)	13	12.6932
0361 (25 mg/mL)	27	10.7459
0361 (25 mg/mL)	37	11.7987
0361 (25 mg/mL)	39	12.1162
0361 (25 mg/mL)	54	12.7625
0361 (25 mg/mL)	68	18.1759
0361 (25 mg/mL)	71	12.6277
0361 (25 mg/mL)	94	15.6471
0361 (25 mg/mL)	99	10.8835
0361 (25 mg/mL)	105	12.9845
0361 (25 mg/mL)	120	11.4123
0361 (2.5 mg/mL)	3	13.2377
0361 (2.5 mg/mL)	31	14.8246
0361 (2.5 mg/mL)	33	8.63821
0361 (2.5 mg/mL)	34	15.2089
0361 (2.5 mg/mL)	35	21.1434
0361 (2.5 mg/mL)	65	13.8893
0361 (2.5 mg/mL)	67	12.421
0361 (2.5 mg/mL)	77	13.8228
0361 (2.5 mg/mL)	84	16.6946
0361 (2.5 mg/mL)	86	12.2354
0361 (2.5 mg/mL)	93	15.8208
0361 (2.5 mg/mL)	97	12.2782
0361 (2.5 mg/mL)	118	13.6547
0361 (1 mg/mL)	6	14.4947
0361 (1 mg/mL)	23	13.6572
0361 (1 mg/mL)	25	13.7415
0361 (1 mg/mL)	43	20.757
0361 (1 mg/mL)	45	15.1639
0361 (1 mg/mL)	47	13.4815
0361 (1 mg/mL)	56	8.78776
0361 (1 mg/mL)	59	14.2209
0361 (1 mg/mL)	62	16.0984
0361 (1 mg/mL)	70	15.7072
0361 (1 mg/mL)	73	15.266
0361 (1 mg/mL)	88	14.0811
0361 (1 mg/mL)	95	16.1892
0361 (1 mg/mL)	106	13.0242
0361 (1 mg/mL)	122	12.6259
2021 (25 mg/mL)	18	13.1329
2021 (25 mg/mL)	51	18.3197
2021 (25 mg/mL)	53	17.093
2021 (25 mg/mL)	57	13.7392
2021 (25 mg/mL)	58	14.9207
2021 (25 mg/mL)	60	15.4474
2021 (25 mg/mL)	61	15.366
2021 (25 mg/mL)	63	12.4262
2021 (25 mg/mL)	79	16.6827
2021 (25 mg/mL)	91	16.7859
2021 (25 mg/mL)	92	17.4367
2021 (25 mg/mL)	100	11.2322
2021 (25 mg/mL)	109	14.4402
2021 (2.5 mg/mL)	2	13.7086
2021 (2.5 mg/mL)	4	11.9118
2021 (2.5 mg/mL)	10	19.6002
2021 (2.5 mg/mL)	20	13.0603
2021 (2.5 mg/mL)	40	12.2283
2021 (2.5 mg/mL)	52	13.7964
2021 (2.5 mg/mL)	69	15.2831
2021 (2.5 mg/mL)	74	12.0971
2021 (2.5 mg/mL)	75	14.8067
2021 (2.5 mg/mL)	85	23.752
2021 (2.5 mg/mL)	90	12.1483
2021 (2.5 mg/mL)	102	14.2396
2021 (2.5 mg/mL)	113	16.3328
2021 (2.5 mg/mL)	119	11.7193
2021 (2.5 mg/mL)	121	17.4588
2021 (1mg/mL)	5	16.0994
2021 (1mg/mL)	8	15.5666
2021 (1mg/mL)	12	12.3659
2021 (1mg/mL)	44	10.4863
2021 (1mg/mL)	46	16.0411
2021 (1mg/mL)	64	15.8445
2021 (1mg/mL)	76	11.4089
2021 (1mg/mL)	87	15.2543
2021 (1mg/mL)	103	11.3322
2021 (1mg/mL)	108	16.4993
2021 (1mg/mL)	110	16.0933
2021 (1mg/mL)	114	14.1022
2021 (1mg/mL)	115	13.7021
2021 (1mg/mL)	116	20.8962
2021 (0.25mg/mL)	15	12.7311
2021 (0.25mg/mL)	17	15.146
2021 (0.25mg/mL)	24	13.4157
2021 (0.25mg/mL)	26	16.1252
2021 (0.25mg/mL)	30	17.592
2021 (0.25mg/mL)	32	21.2607
2021 (0.25mg/mL)	41	9.59254
2021 (0.25mg/mL)	48	13.9292
2021 (0.25mg/mL)	50	19.5908
2021 (0.25mg/mL)	72	14.914
2021 (0.25mg/mL)	81	13.0489
2021 (0.25mg/mL)	83	13.0043
2021 (0.25mg/mL)	89	18.3715
2021 (0.25mg/mL)	96	20.3471
2021 (0.25mg/mL)	123	16.8086

## Sheet: Panel D
Treatment (Dose)	Animal	CD11b (Area%)
None	134	0.0549645
None	135	0.0273844
None	136	0.0872049
None	137	0.0731777
None	138	0.128356
Isotype ctrl	11	0.0692154
Isotype ctrl	16	0.0586169
Isotype ctrl	19	0.0828124
Isotype ctrl	21	0.0890316
Isotype ctrl	22	0.420874
Isotype ctrl	28	1.00097
Isotype ctrl	29	0.634742
Isotype ctrl	36	1.07605
Isotype ctrl	38	0.57392
Isotype ctrl	42	0.315652
Isotype ctrl	49	2.0154
Isotype ctrl	66	1.13536
Isotype ctrl	80	0.905965
Isotype ctrl	82	1.29062
Isotype ctrl	111	0.957649
Isotype ctrl	112	0.649004
Isotype ctrl	117	0.352353
0361 (25 mg/mL)	7	0.160039
0361 (25 mg/mL)	9	0.450932
0361 (25 mg/mL)	13	0.609536
0361 (25 mg/mL)	27	0.338034
0361 (25 mg/mL)	37	0.433459
0361 (25 mg/mL)	39	0.372592
0361 (25 mg/mL)	54	0.656374
0361 (25 mg/mL)	68	2.00327
0361 (25 mg/mL)	71	0.487548
0361 (25 mg/mL)	94	1.43086
0361 (25 mg/mL)	99	0.546958
0361 (25 mg/mL)	105	0.528802
0361 (25 mg/mL)	120	0.646559
0361 (2.5 mg/mL)	3	0.0908581
0361 (2.5 mg/mL)	31	6.2494464472706e-4
0361 (2.5 mg/mL)	33	0.00340232
0361 (2.5 mg/mL)	34	8.21806138235745e-4
0361 (2.5 mg/mL)	35	3.20032
0361 (2.5 mg/mL)	65	1.42157
0361 (2.5 mg/mL)	67	0.76294
0361 (2.5 mg/mL)	77	0.277096
0361 (2.5 mg/mL)	84	1.20521
0361 (2.5 mg/mL)	86	1.30878
0361 (2.5 mg/mL)	93	1.17096
0361 (2.5 mg/mL)	97	1.28248
0361 (2.5 mg/mL)	118	0.938044
0361 (1 mg/mL)	6	0.359517
0361 (1 mg/mL)	23	0.451363
0361 (1 mg/mL)	25	0.104855
0361 (1 mg/mL)	43	0.322438
0361 (1 mg/mL)	45	0.552649
0361 (1 mg/mL)	47	0.162183
0361 (1 mg/mL)	56	0.338869
0361 (1 mg/mL)	59	0.77208
0361 (1 mg/mL)	62	0.843608
0361 (1 mg/mL)	70	0.957263
0361 (1 mg/mL)	73	1.35617
0361 (1 mg/mL)	88	2.33524
0361 (1 mg/mL)	95	1.00806
0361 (1 mg/mL)	106	1.31786
0361 (1 mg/mL)	122	0.333196
2021 (25 mg/mL)	18	0.231462
2021 (25 mg/mL)	51	1.54786
2021 (25 mg/mL)	53	0.788481
2021 (25 mg/mL)	57	0.17597
2021 (25 mg/mL)	58	0.128914
2021 (25 mg/mL)	60	0.0119203
2021 (25 mg/mL)	61	1.88466
2021 (25 mg/mL)	63	0.210809
2021 (25 mg/mL)	79	1.62871
2021 (25 mg/mL)	91	0.589275
2021 (25 mg/mL)	92	1.39784
2021 (25 mg/mL)	100	1.8248
2021 (25 mg/mL)	109	0.454183
2021 (2.5 mg/mL)	2	0.348812
2021 (2.5 mg/mL)	4	0.353572
2021 (2.5 mg/mL)	10	0.519989
2021 (2.5 mg/mL)	20	0.252634
2021 (2.5 mg/mL)	40	0.108791
2021 (2.5 mg/mL)	52	0.17694
2021 (2.5 mg/mL)	69	0.59558
2021 (2.5 mg/mL)	74	0.196872
2021 (2.5 mg/mL)	75	NA
2021 (2.5 mg/mL)	85	NA
2021 (2.5 mg/mL)	90	0.347324
2021 (2.5 mg/mL)	102	0.523609
2021 (2.5 mg/mL)	113	1.25892
2021 (2.5 mg/mL)	119	0.924868
2021 (2.5 mg/mL)	121	1.46613
2021 (1mg/mL)	5	0.897862
2021 (1mg/mL)	8	0.863318
2021 (1mg/mL)	12	0.604165
2021 (1mg/mL)	44	0.394308
2021 (1mg/mL)	46	0.579731
2021 (1mg/mL)	64	0.586888
2021 (1mg/mL)	76	0.340182
2021 (1mg/mL)	87	0.415126
2021 (1mg/mL)	103	0.720622
2021 (1mg/mL)	108	2.24875
2021 (1mg/mL)	110	0.795255
2021 (1mg/mL)	114	1.65903
2021 (1mg/mL)	115	0.956237
2021 (1mg/mL)	116	1.72336
2021 (0.25mg/mL)	15	0.806276
2021 (0.25mg/mL)	17	0.41735
2021 (0.25mg/mL)	24	0.0806083
2021 (0.25mg/mL)	26	0.310858
2021 (0.25mg/mL)	30	0.990077
2021 (0.25mg/mL)	32	0.459053
2021 (0.25mg/mL)	41	0.274952
2021 (0.25mg/mL)	48	0.877732
2021 (0.25mg/mL)	50	0.885622
2021 (0.25mg/mL)	72	0.486367
2021 (0.25mg/mL)	81	0.420274
2021 (0.25mg/mL)	83	1.22743
2021 (0.25mg/mL)	89	1.82924
2021 (0.25mg/mL)	96	3.6096
2021 (0.25mg/mL)	123	1.68669
