# Supplementary material for: Evaluation of Gremlin-1 as a therapeutic target in metabolic dysfunction-associated steatohepatitis
Source: eLife. 2024 Oct 3;13:RP95185. doi: 10.7554/eLife.95185 (PMC11449483; doi:10.7554/eLife.95185)
Supplement: Figure 5—figure supplement 3—source data 1. [file elife-95185-fig5-figsupp3-data1.xlsx]

## Sheet: -DeltaDeltaCt
treatment	Grem1	Col1a1	Col3a1	Timp1	Tgfb1	Tnf
0361:ND (1 mg/kg)	4.03651	5.66798	3.48119	4.51156	2.98653	2.69418
0361:ND (1 mg/kg)	4.54725	5.77676	3.92391	4.96456	3.11637	2.69516
0361:ND (1 mg/kg)	5.78845	5.78539	3.66106	5.94277	3.06128	2.99903
0361:ND (1 mg/kg)	3.43483	6.62391	4.39791	4.33362	3.03847	3.28177
0361:ND (1 mg/kg)	3.48367	6.84031	4.59926	4.46442	3.27712	3.33561
0361:ND (1 mg/kg)	2.64616	6.9101	4.36795	3.76856	3.06172	3.38302
0361:ND (1 mg/kg)	2.88909	7.08469	4.21105	4.2041	3.59519	3.62368
0361:ND (1 mg/kg)	3.16833	7.16814	4.40749	4.46222	3.65767	3.7271
0361:ND (1 mg/kg)	4.02007	7.32732	4.53818	4.51648	3.55121	3.91068
0361:ND (1 mg/kg)	2.38935	7.32783	4.25134	3.13154	3.70227	4.07892
0361:ND (1 mg/kg)	2.87786	7.38754	4.88108	4.71745	3.63685	4.09736
0361:ND (1 mg/kg)	3.3622	7.61713	4.66575	4.58161	3.41319	4.14096
0361:ND (1 mg/kg)	3.56424	7.83565	4.76839	3.95359	3.64054	4.27623
0361:ND (1 mg/kg)	3.07449	8.20584	4.29159	4.80774	4.18395	5.18389
0361:ND (1 mg/kg)	NA	NA	NA	NA	NA	5.45871
0361:ND (2.5 mg/kg)	4.30798	6.02128	4.3421	5.01655	3.07396	3.15208
0361:ND (2.5 mg/kg)	3.58532	6.13672	4.41405	4.68691	3.09937	3.16945
0361:ND (2.5 mg/kg)	4.81172	6.31895	3.81535	5.22824	3.38403	3.25005
0361:ND (2.5 mg/kg)	3.22483	6.38785	3.95487	4.65946	3.277	3.34696
0361:ND (2.5 mg/kg)	3.10469	6.40547	4.35041	3.6326	3.5852	3.60473
0361:ND (2.5 mg/kg)	2.9643	6.9658	4.53651	3.85398	3.15991	3.61128
0361:ND (2.5 mg/kg)	1.99463	7.06579	4.29301	3.77106	3.37	3.62857
0361:ND (2.5 mg/kg)	2.26388	7.13078	4.03982	4.15325	3.23987	3.66002
0361:ND (2.5 mg/kg)	4.87374	7.45672	5.13966	5.29897	3.26007	3.85745
0361:ND (2.5 mg/kg)	2.94766	7.5146	3.83007	3.58183	3.91673	3.92467
0361:ND (2.5 mg/kg)	2.58567	7.60831	4.3034	3.59357	3.71451	4.31423
0361:ND (2.5 mg/kg)	3.90346	8.12381	4.11266	4.11999	4.02162	4.39032
0361:ND (2.5 mg/kg)	4.47551	8.19977	4.27266	4.92841	4.03845	4.8858
0361:ND (25 mg/kg)	2.43538	5.87236	3.58535	3.86027	3.31718	3.29549
0361:ND (25 mg/kg)	5.09546	6.27382	3.819	4.78386	3.75075	3.36603
0361:ND (25 mg/kg)	4.02714	6.49755	4.187	5.22765	2.7996	3.45407
0361:ND (25 mg/kg)	3.35906	6.79987	4.55589	4.05288	3.1684	3.4589
0361:ND (25 mg/kg)	3.8944	6.92555	4.31879	4.51832	3.22497	3.6382
0361:ND (25 mg/kg)	2.39426	7.08325	4.44403	4.06688	3.19026	3.69046
0361:ND (25 mg/kg)	3.71568	7.12831	3.69371	3.85616	3.37467	3.72858
0361:ND (25 mg/kg)	3.54137	7.2869	4.50297	0.807103	3.6753	3.8768
0361:ND (25 mg/kg)	3.74205	7.36281	4.58788	4.80776	4.27438	4.05924
0361:ND (25 mg/kg)	3.17047	7.57763	4.68677	4.62116	3.71002	4.06996
0361:ND (25 mg/kg)	2.82504	7.93932	4.40798	4.23023	3.66073	4.08415
0361:ND (25 mg/kg)	4.24794	8.35245	4.85201	4.14541	3.77605	4.57517
2021:HD (0.25 mg/kg)	4.63346	6.37467	4.07335	5.44029	3.32835	3.32162
2021:HD (0.25 mg/kg)	3.91544	6.68981	4.20116	4.11925	3.16178	3.51702
2021:HD (0.25 mg/kg)	3.59348	6.77621	4.38528	4.52141	3.54473	3.55382
2021:HD (0.25 mg/kg)	3.43699	6.99582	4.61044	4.54852	3.36862	3.6348
2021:HD (0.25 mg/kg)	3.97386	7.14306	4.27126	4.21154	3.07415	3.64005
2021:HD (0.25 mg/kg)	4.80042	7.36561	4.69669	4.20601	3.61262	3.92232
2021:HD (0.25 mg/kg)	2.98831	7.39943	4.49868	4.37132	3.77332	3.94397
2021:HD (0.25 mg/kg)	2.35016	7.42485	4.08901	4.43833	3.83201	4.00874
2021:HD (0.25 mg/kg)	4.15398	7.43408	4.22817	5.22232	3.6515	4.0712
2021:HD (0.25 mg/kg)	5.14725	7.72679	4.58229	5.28688	3.81521	4.08302
2021:HD (0.25 mg/kg)	1.15379	7.74136	4.42009	3.69424	3.66177	4.14672
2021:HD (0.25 mg/kg)	3.03769	7.84401	4.40144	3.92115	3.96484	4.1878
2021:HD (0.25 mg/kg)	4.93958	8.03715	4.59963	5.01796	4.30212	4.2207
2021:HD (0.25 mg/kg)	4.06555	8.49451	4.76962	4.37267	4.57469	4.44076
2021:HD (0.25 mg/kg)	NA	NA	NA	NA	4.58692	4.80648
2021:HD (1 mg/kg)	3.04424	4.82394	2.94325	3.62578	3.74035	2.95017
2021:HD (1 mg/kg)	3.98233	6.40007	4.36293	4.87508	3.73392	3.21765
2021:HD (1 mg/kg)	0.933732	6.65346	4.34271	-3.02723	3.11474	3.31091
2021:HD (1 mg/kg)	3.44641	6.92944	4.32528	4.41031	3.68221	3.41899
2021:HD (1 mg/kg)	2.83272	6.97216	4.85483	4.97513	2.43632	3.4304
2021:HD (1 mg/kg)	4.12058	7.04287	4.078	4.80455	3.31124	3.69511
2021:HD (1 mg/kg)	4.01138	7.04891	4.30798	5.18555	3.3458	3.75842
2021:HD (1 mg/kg)	4.46245	7.50396	4.77168	4.67874	3.61034	3.8787
2021:HD (1 mg/kg)	3.77511	7.53266	4.86139	4.48232	3.58187	3.92907
2021:HD (1 mg/kg)	3.9389	7.76427	5.00155	4.61105	3.77062	4.02667
2021:HD (1 mg/kg)	3.26648	8.1317	4.42057	3.78817	4.03458	4.49487
2021:HD (1 mg/kg)	3.37011	8.58722	4.70556	4.5704	3.98635	4.54971
2021:HD (1 mg/kg)	NA	NA	NA	NA	5.25806	4.92167
2021:HD (2.5 mg/kg)	4.46551	6.03616	4.71822	4.33686	3.01527	2.88356
2021:HD (2.5 mg/kg)	3.20065	6.03734	4.18242	3.8878	3.00933	3.0901
2021:HD (2.5 mg/kg)	4.31095	6.31767	1.81334	4.33561	3.49587	3.14152
2021:HD (2.5 mg/kg)	3.82666	6.4484	4.5376	3.62919	2.89781	3.22338
2021:HD (2.5 mg/kg)	3.9023	6.70379	4.14125	4.55908	3.36372	3.22987
2021:HD (2.5 mg/kg)	4.55944	6.71359	4.18777	4.28842	3.25991	3.3049
2021:HD (2.5 mg/kg)	4.27337	6.96645	4.36484	4.57693	3.25601	3.54024
2021:HD (2.5 mg/kg)	4.55099	7.0656	3.64406	4.34591	2.69694	3.67766
2021:HD (2.5 mg/kg)	4.35749	7.10381	4.31754	3.96805	3.53128	3.93748
2021:HD (2.5 mg/kg)	4.05322	7.56318	4.61843	5.64687	3.72434	3.97907
2021:HD (2.5 mg/kg)	4.71385	8.07727	4.1043	4.42774	3.87787	4.23533
2021:HD (2.5 mg/kg)	NA	NA	NA	NA	NA	4.71107
2021:HD (25 mg/kg)	4.45347	5.55234	5.34563	4.16861	2.72209	2.37326
2021:HD (25 mg/kg)	4.34084	6.12814	4.92086	3.90618	3.06039	2.77765
2021:HD (25 mg/kg)	4.20732	6.19875	4.67955	4.91043	3.15139	3.11987
2021:HD (25 mg/kg)	4.06963	6.5829	4.42636	4.39686	3.19184	3.24147
2021:HD (25 mg/kg)	4.35164	6.70553	3.55549	5.17318	2.96435	3.25585
2021:HD (25 mg/kg)	4.03625	6.7562	3.92197	4.53671	3.56809	3.3606
2021:HD (25 mg/kg)	4.77991	6.99746	4.35418	3.99788	2.98494	3.42451
2021:HD (25 mg/kg)	4.70094	7.25241	5.08005	4.81666	3.48891	3.46089
2021:HD (25 mg/kg)	4.81701	7.41169	4.46706	4.19207	3.70868	3.50347
2021:HD (25 mg/kg)	4.1155	7.51407	4.23283	5.03725	3.92397	3.64308
2021:HD (25 mg/kg)	4.54796	7.66665	3.53602	5.37847	3.51789	3.88954
2021:HD (25 mg/kg)	4.96704	7.75882	3.89339	4.40074	3.77018	3.97189
2021:HD (25 mg/kg)	5.13721	7.82153	5.35906	4.737	3.70946	4.12765
chow	0.346166	-0.129134	-0.80793	-0.492932	-0.711861	-0.99043
chow	-0.0313961	0.22945	-0.175467	0.485967	-0.134548	-0.243311
chow	0.155774	1.76418	-0.385534	0.462158	-0.0301833	-0.172288
chow	-0.242684	-1.20758	1.99248	-0.600027	0.689628	0.595237
chow	-0.22786	-0.656915	-0.623546	0.144834	0.186965	0.810792
Iso-Ab	3.83033	5.44594	3.98139	4.64802	1.87345	2.06626
Iso-Ab	4.18533	5.75963	3.97668	3.39674	2.55128	2.98218
Iso-Ab	3.80188	6.04716	4.56477	4.52887	2.80137	3.07021
Iso-Ab	3.94282	6.19831	3.46458	4.80391	2.91807	3.08905
Iso-Ab	4.3976	6.71231	4.23907	4.00678	3.53093	3.14658
Iso-Ab	4.17963	6.83303	4.29133	4.77439	3.53677	3.16397
Iso-Ab	4.10389	6.86073	4.83822	3.57509	3.5395	3.70996
Iso-Ab	4.53646	6.86592	4.72745	4.23463	3.37421	3.72745
Iso-Ab	4.48907	7.1867	3.73259	4.38542	3.37728	3.73788
Iso-Ab	4.76855	7.20702	5.76027	4.78577	3.5853	3.75451
Iso-Ab	4.45183	7.22479	4.08617	4.91402	3.43933	3.88374
Iso-Ab	4.23173	7.72045	4.42563	4.99653	3.27094	4.11385
Iso-Ab	4.96832	7.75321	3.71306	4.64965	3.96954	4.28198
Iso-Ab	4.62283	7.8236	4.75988	4.39425	3.65759	4.34479
Iso-Ab	4.12529	7.88408	-0.214979	4.91822	3.89587	4.39652
Iso-Ab	4.93523	7.96112	5.56145	5.51706	3.94324	4.67293
