# Supplementary material for: Evaluation of Gremlin-1 as a therapeutic target in metabolic dysfunction-associated steatohepatitis
Source: eLife. 2024 Oct 3;13:RP95185. doi: 10.7554/eLife.95185 (PMC11449483; doi:10.7554/eLife.95185)
Supplement: Figure 5—source data 1. [file elife-95185-fig5-data1.xlsx]

## Sheet: Panel B
Animal	Treatment (Dose)	Body weight (g)
134	None	657
135	None	636.5
136	None	663.4
137	None	618.1
138	None	621.7
11	Isotype ctrl	435
16	Isotype ctrl	433
19	Isotype ctrl	471
21	Isotype ctrl	422
22	Isotype ctrl	380
28	Isotype ctrl	421
29	Isotype ctrl	451
36	Isotype ctrl	426
38	Isotype ctrl	520
42	Isotype ctrl	511.3
49	Isotype ctrl	429.1
66	Isotype ctrl	445.4
80	Isotype ctrl	542.9
82	Isotype ctrl	481.3
111	Isotype ctrl	456.8
112	Isotype ctrl	448.8
117	Isotype ctrl	531.4
7	0361 (25 mg/mL)	444
9	0361 (25 mg/mL)	443
13	0361 (25 mg/mL)	499
27	0361 (25 mg/mL)	507
37	0361 (25 mg/mL)	543
39	0361 (25 mg/mL)	496
54	0361 (25 mg/mL)	463.7
68	0361 (25 mg/mL)	471.4
71	0361 (25 mg/mL)	435.2
94	0361 (25 mg/mL)	439.2
99	0361 (25 mg/mL)	476.1
105	0361 (25 mg/mL)	488.4
120	0361 (25 mg/mL)	437.9
3	0361 (2.5 mg/mL)	475
31	0361 (2.5 mg/mL)	466
33	0361 (2.5 mg/mL)	484
34	0361 (2.5 mg/mL)	393
35	0361 (2.5 mg/mL)	390
65	0361 (2.5 mg/mL)	472.3
67	0361 (2.5 mg/mL)	470.9
77	0361 (2.5 mg/mL)	444.3
84	0361 (2.5 mg/mL)	389.3
86	0361 (2.5 mg/mL)	497.9
93	0361 (2.5 mg/mL)	475.9
97	0361 (2.5 mg/mL)	506.1
118	0361 (2.5 mg/mL)	423.6
6	0361 (1 mg/mL)	395
23	0361 (1 mg/mL)	490
25	0361 (1 mg/mL)	489
43	0361 (1 mg/mL)	382.9
45	0361 (1 mg/mL)	441
47	0361 (1 mg/mL)	509.7
56	0361 (1 mg/mL)	435.2
59	0361 (1 mg/mL)	416.2
62	0361 (1 mg/mL)	503.7
70	0361 (1 mg/mL)	372
73	0361 (1 mg/mL)	506
88	0361 (1 mg/mL)	398.3
95	0361 (1 mg/mL)	439.4
106	0361 (1 mg/mL)	480.2
122	0361 (1 mg/mL)	434.9
18	2021 (25 mg/mL)	442
51	2021 (25 mg/mL)	392.9
53	2021 (25 mg/mL)	414.9
57	2021 (25 mg/mL)	416
58	2021 (25 mg/mL)	461.7
60	2021 (25 mg/mL)	472.5
61	2021 (25 mg/mL)	430.9
63	2021 (25 mg/mL)	397.5
79	2021 (25 mg/mL)	410.4
91	2021 (25 mg/mL)	465.5
92	2021 (25 mg/mL)	451.9
100	2021 (25 mg/mL)	501.5
109	2021 (25 mg/mL)	496.9
2	2021 (2.5 mg/mL)	440.7
4	2021 (2.5 mg/mL)	421
10	2021 (2.5 mg/mL)	390.8
20	2021 (2.5 mg/mL)	430
40	2021 (2.5 mg/mL)	460
52	2021 (2.5 mg/mL)	482.7
69	2021 (2.5 mg/mL)	352.2
74	2021 (2.5 mg/mL)	458.4
75	2021 (2.5 mg/mL)	426.7
85	2021 (2.5 mg/mL)	474.6
90	2021 (2.5 mg/mL)	422.4
102	2021 (2.5 mg/mL)	490
113	2021 (2.5 mg/mL)	434.4
119	2021 (2.5 mg/mL)	465.4
121	2021 (2.5 mg/mL)	419.9
5	2021 (1mg/mL)	475
8	2021 (1mg/mL)	407
12	2021 (1mg/mL)	417
44	2021 (1mg/mL)	428.2
46	2021 (1mg/mL)	446.4
64	2021 (1mg/mL)	497.6
76	2021 (1mg/mL)	459.5
87	2021 (1mg/mL)	436.1
103	2021 (1mg/mL)	485
108	2021 (1mg/mL)	417.9
110	2021 (1mg/mL)	445.7
114	2021 (1mg/mL)	427.1
115	2021 (1mg/mL)	417.8
116	2021 (1mg/mL)	428.6
15	2021 (0.25mg/mL)	492
17	2021 (0.25mg/mL)	539
24	2021 (0.25mg/mL)	467
26	2021 (0.25mg/mL)	460
30	2021 (0.25mg/mL)	431
32	2021 (0.25mg/mL)	452
41	2021 (0.25mg/mL)	425.3
48	2021 (0.25mg/mL)	383.2
50	2021 (0.25mg/mL)	450.7
72	2021 (0.25mg/mL)	445.2
81	2021 (0.25mg/mL)	483.6
83	2021 (0.25mg/mL)	467.2
89	2021 (0.25mg/mL)	380.6
96	2021 (0.25mg/mL)	421.9
123	2021 (0.25mg/mL)	407.9

## Sheet: Panel C
Animal	Treatment (Dose)	Plasma ALT (U/L)
134	None	66.8
135	None	87.2
136	None	55
137	None	75.6
138	None	76
11	Isotype ctrl	106.1
16	Isotype ctrl	151.5
19	Isotype ctrl	115.5
21	Isotype ctrl	352
22	Isotype ctrl	177.8
28	Isotype ctrl	335.4
29	Isotype ctrl	101
36	Isotype ctrl	285.4
38	Isotype ctrl	108.6
42	Isotype ctrl	122.2
49	Isotype ctrl	151.2
66	Isotype ctrl	281.4
80	Isotype ctrl	132.2
82	Isotype ctrl	152.4
111	Isotype ctrl	290.8
112	Isotype ctrl	286
117	Isotype ctrl	193
7	0361 (25 mg/mL)	211.4
9	0361 (25 mg/mL)	159
13	0361 (25 mg/mL)	132.4
27	0361 (25 mg/mL)	155.6
37	0361 (25 mg/mL)	129.4
39	0361 (25 mg/mL)	131
54	0361 (25 mg/mL)	125
68	0361 (25 mg/mL)	129
71	0361 (25 mg/mL)	122.8
94	0361 (25 mg/mL)	189.8
99	0361 (25 mg/mL)	171.8
105	0361 (25 mg/mL)	145
120	0361 (25 mg/mL)	133.4
3	0361 (2.5 mg/mL)	172.5
31	0361 (2.5 mg/mL)	159
33	0361 (2.5 mg/mL)	200.4
34	0361 (2.5 mg/mL)	122.4
65	0361 (2.5 mg/mL)	169
67	0361 (2.5 mg/mL)	164.8
77	0361 (2.5 mg/mL)	166.2
84	0361 (2.5 mg/mL)	182.6
86	0361 (2.5 mg/mL)	106.6
93	0361 (2.5 mg/mL)	236.8
97	0361 (2.5 mg/mL)	161.6
118	0361 (2.5 mg/mL)	198.6
6	0361 (1 mg/mL)	213.7
23	0361 (1 mg/mL)	183.4
25	0361 (1 mg/mL)	215.4
43	0361 (1 mg/mL)	188.4
45	0361 (1 mg/mL)	101.8
47	0361 (1 mg/mL)	102.8
56	0361 (1 mg/mL)	152.4
59	0361 (1 mg/mL)	313.2
62	0361 (1 mg/mL)	124.6
73	0361 (1 mg/mL)	307.8
88	0361 (1 mg/mL)	211.2
95	0361 (1 mg/mL)	174.4
106	0361 (1 mg/mL)	115.2
122	0361 (1 mg/mL)	274.4
18	2021 (25 mg/mL)	202.5
51	2021 (25 mg/mL)	125.4
53	2021 (25 mg/mL)	151
57	2021 (25 mg/mL)	145.8
58	2021 (25 mg/mL)	206.2
60	2021 (25 mg/mL)	139.8
61	2021 (25 mg/mL)	87.4
63	2021 (25 mg/mL)	256
79	2021 (25 mg/mL)	345.8
91	2021 (25 mg/mL)	153.8
92	2021 (25 mg/mL)	142.8
100	2021 (25 mg/mL)	111.2
109	2021 (25 mg/mL)	147.2
4	2021 (2.5 mg/mL)	123.6
20	2021 (2.5 mg/mL)	900.3
40	2021 (2.5 mg/mL)	188.2
52	2021 (2.5 mg/mL)	248.2
69	2021 (2.5 mg/mL)	182
74	2021 (2.5 mg/mL)	314.8
75	2021 (2.5 mg/mL)	107.8
85	2021 (2.5 mg/mL)	130.4
90	2021 (2.5 mg/mL)	198
102	2021 (2.5 mg/mL)	127.4
113	2021 (2.5 mg/mL)	117.4
119	2021 (2.5 mg/mL)	263.4
121	2021 (2.5 mg/mL)	308
5	2021 (1mg/mL)	102
8	2021 (1mg/mL)	126.1
12	2021 (1mg/mL)	163.8
44	2021 (1mg/mL)	106.6
46	2021 (1mg/mL)	201.4
64	2021 (1mg/mL)	165
76	2021 (1mg/mL)	129.2
87	2021 (1mg/mL)	149.8
103	2021 (1mg/mL)	235
108	2021 (1mg/mL)	124.8
110	2021 (1mg/mL)	96.8
114	2021 (1mg/mL)	248
115	2021 (1mg/mL)	146.4
116	2021 (1mg/mL)	168.4
15	2021 (0.25mg/mL)	117
17	2021 (0.25mg/mL)	96
24	2021 (0.25mg/mL)	286.4
26	2021 (0.25mg/mL)	235
30	2021 (0.25mg/mL)	166.4
32	2021 (0.25mg/mL)	150.2
41	2021 (0.25mg/mL)	197
48	2021 (0.25mg/mL)	328
50	2021 (0.25mg/mL)	165.6
72	2021 (0.25mg/mL)	297.6
81	2021 (0.25mg/mL)	147.6
83	2021 (0.25mg/mL)	188.6
89	2021 (0.25mg/mL)	181.4
96	2021 (0.25mg/mL)	161.2
123	2021 (0.25mg/mL)	185.6

## Sheet: Panel D
Animal	Treatment (Dose)	Plasma AST (U/L)
134	None	217.2
135	None	106.6
136	None	109.4
137	None	465.4
138	None	514
11	Isotype ctrl	460.4
16	Isotype ctrl	510.7
19	Isotype ctrl	553.5
21	Isotype ctrl	760.6
22	Isotype ctrl	454
28	Isotype ctrl	645
29	Isotype ctrl	437.2
36	Isotype ctrl	693.8
38	Isotype ctrl	543.6
42	Isotype ctrl	451.4
49	Isotype ctrl	558.8
66	Isotype ctrl	549.4
80	Isotype ctrl	472
82	Isotype ctrl	671.6
111	Isotype ctrl	635.4
112	Isotype ctrl	775.4
117	Isotype ctrl	557
7	0361 (25 mg/mL)	578.2
9	0361 (25 mg/mL)	412.5
13	0361 (25 mg/mL)	508.2
27	0361 (25 mg/mL)	610.8
37	0361 (25 mg/mL)	720.6
39	0361 (25 mg/mL)	501.2
54	0361 (25 mg/mL)	463.8
68	0361 (25 mg/mL)	540.2
71	0361 (25 mg/mL)	539.4
94	0361 (25 mg/mL)	631.4
99	0361 (25 mg/mL)	699
105	0361 (25 mg/mL)	503.2
120	0361 (25 mg/mL)	540
3	0361 (2.5 mg/mL)	499.2
31	0361 (2.5 mg/mL)	458.4
33	0361 (2.5 mg/mL)	498.2
34	0361 (2.5 mg/mL)	464
35	0361 (2.5 mg/mL)	>Abs
65	0361 (2.5 mg/mL)	440.4
67	0361 (2.5 mg/mL)	376.6
77	0361 (2.5 mg/mL)	489.2
84	0361 (2.5 mg/mL)	571.4
86	0361 (2.5 mg/mL)	430.6
93	0361 (2.5 mg/mL)	991.8
97	0361 (2.5 mg/mL)	472
118	0361 (2.5 mg/mL)	528.6
6	0361 (1 mg/mL)	680.4
23	0361 (1 mg/mL)	607.8
25	0361 (1 mg/mL)	588.8
43	0361 (1 mg/mL)	490
45	0361 (1 mg/mL)	469.8
47	0361 (1 mg/mL)	388.6
56	0361 (1 mg/mL)	443
59	0361 (1 mg/mL)	726.2
62	0361 (1 mg/mL)	590
70	0361 (1 mg/mL)	>Abs
73	0361 (1 mg/mL)	715.6
88	0361 (1 mg/mL)	502.2
95	0361 (1 mg/mL)	755.2
106	0361 (1 mg/mL)	602
122	0361 (1 mg/mL)	660.8
18	2021 (25 mg/mL)	646.5
51	2021 (25 mg/mL)	581.8
53	2021 (25 mg/mL)	513.2
57	2021 (25 mg/mL)	390.8
58	2021 (25 mg/mL)	566.2
60	2021 (25 mg/mL)	440.4
61	2021 (25 mg/mL)	331.8
63	2021 (25 mg/mL)	816
79	2021 (25 mg/mL)	609.2
91	2021 (25 mg/mL)	563.6
92	2021 (25 mg/mL)	571.4
100	2021 (25 mg/mL)	294.2
109	2021 (25 mg/mL)	621.8
2	2021 (2.5 mg/mL)	NA
4	2021 (2.5 mg/mL)	476.8
10	2021 (2.5 mg/mL)	NA
20	2021 (2.5 mg/mL)	547.8
40	2021 (2.5 mg/mL)	516
52	2021 (2.5 mg/mL)	525.8
69	2021 (2.5 mg/mL)	370.8
74	2021 (2.5 mg/mL)	622
75	2021 (2.5 mg/mL)	405
85	2021 (2.5 mg/mL)	702.6
90	2021 (2.5 mg/mL)	579.8
102	2021 (2.5 mg/mL)	703.2
113	2021 (2.5 mg/mL)	503.6
119	2021 (2.5 mg/mL)	608.2
121	2021 (2.5 mg/mL)	603
5	2021 (1mg/mL)	475.8
8	2021 (1mg/mL)	491.3
12	2021 (1mg/mL)	433
44	2021 (1mg/mL)	432
46	2021 (1mg/mL)	543.8
64	2021 (1mg/mL)	443
76	2021 (1mg/mL)	501.6
87	2021 (1mg/mL)	563.6
103	2021 (1mg/mL)	523.8
108	2021 (1mg/mL)	495.4
110	2021 (1mg/mL)	490.6
114	2021 (1mg/mL)	622.2
115	2021 (1mg/mL)	546.8
116	2021 (1mg/mL)	738.4
15	2021 (0.25mg/mL)	365.6
17	2021 (0.25mg/mL)	537.5
24	2021 (0.25mg/mL)	653.8
26	2021 (0.25mg/mL)	633.6
30	2021 (0.25mg/mL)	533
32	2021 (0.25mg/mL)	729.4
41	2021 (0.25mg/mL)	728.6
48	2021 (0.25mg/mL)	677.6
50	2021 (0.25mg/mL)	643.8
72	2021 (0.25mg/mL)	663.6
81	2021 (0.25mg/mL)	487.6
83	2021 (0.25mg/mL)	493.6
89	2021 (0.25mg/mL)	603.4
96	2021 (0.25mg/mL)	701.2
123	2021 (0.25mg/mL)	656.2

## Sheet: Panel E
Animal	Treatment (Dose)	Relative liver weight (%)
134	None	2.76317
135	None	2.72286
136	None	2.94347
137	None	2.65442
138	None	2.77931
11	Isotype ctrl	5.23264
16	Isotype ctrl	5.73095
19	Isotype ctrl	4.99299
21	Isotype ctrl	5.91967
22	Isotype ctrl	7.07447
28	Isotype ctrl	5.33373
29	Isotype ctrl	6.05543
36	Isotype ctrl	6.80775
38	Isotype ctrl	5.51192
42	Isotype ctrl	6.49403
49	Isotype ctrl	4.43603
66	Isotype ctrl	5.57252
80	Isotype ctrl	5.46086
82	Isotype ctrl	3.93663
111	Isotype ctrl	6.07487
112	Isotype ctrl	6.0254
117	Isotype ctrl	6.17313
7	0361 (25 mg/mL)	4.81847
9	0361 (25 mg/mL)	4.51716
13	0361 (25 mg/mL)	5.88918
27	0361 (25 mg/mL)	4.98245
37	0361 (25 mg/mL)	4.88195
39	0361 (25 mg/mL)	4.71351
54	0361 (25 mg/mL)	5.7548
68	0361 (25 mg/mL)	4.17989
71	0361 (25 mg/mL)	4.86972
94	0361 (25 mg/mL)	4.48133
99	0361 (25 mg/mL)	7.22264
105	0361 (25 mg/mL)	5.89251
120	0361 (25 mg/mL)	5.88947
3	0361 (2.5 mg/mL)	6.11874
31	0361 (2.5 mg/mL)	4.32639
33	0361 (2.5 mg/mL)	7.16963
34	0361 (2.5 mg/mL)	6.20814
35	0361 (2.5 mg/mL)	3.46949
65	0361 (2.5 mg/mL)	6.45162
67	0361 (2.5 mg/mL)	5.35846
77	0361 (2.5 mg/mL)	5.80171
84	0361 (2.5 mg/mL)	5.86668
86	0361 (2.5 mg/mL)	5.35449
93	0361 (2.5 mg/mL)	4.31897
97	0361 (2.5 mg/mL)	6.02233
118	0361 (2.5 mg/mL)	6.13716
6	0361 (1 mg/mL)	5.62152
23	0361 (1 mg/mL)	5.88102
25	0361 (1 mg/mL)	5.1544
43	0361 (1 mg/mL)	3.99817
45	0361 (1 mg/mL)	5.07528
47	0361 (1 mg/mL)	5.56366
56	0361 (1 mg/mL)	5.33915
59	0361 (1 mg/mL)	6.46372
62	0361 (1 mg/mL)	5.68831
70	0361 (1 mg/mL)	3.60484
73	0361 (1 mg/mL)	6.49209
88	0361 (1 mg/mL)	5.72006
95	0361 (1 mg/mL)	6.17524
106	0361 (1 mg/mL)	6.22949
122	0361 (1 mg/mL)	5.22649
18	2021 (25 mg/mL)	4.92443
51	2021 (25 mg/mL)	3.81955
53	2021 (25 mg/mL)	5.10774
57	2021 (25 mg/mL)	5.73942
58	2021 (25 mg/mL)	5.2898
60	2021 (25 mg/mL)	5.64825
61	2021 (25 mg/mL)	5.10327
63	2021 (25 mg/mL)	6.29686
79	2021 (25 mg/mL)	6.03216
91	2021 (25 mg/mL)	6.46681
92	2021 (25 mg/mL)	5.58376
100	2021 (25 mg/mL)	7.85962
109	2021 (25 mg/mL)	6.47897
2	2021 (2.5 mg/mL)	5.68096
4	2021 (2.5 mg/mL)	7.77981
10	2021 (2.5 mg/mL)	3.97518
20	2021 (2.5 mg/mL)	6.00535
40	2021 (2.5 mg/mL)	5.94783
52	2021 (2.5 mg/mL)	6.60162
69	2021 (2.5 mg/mL)	6.07269
74	2021 (2.5 mg/mL)	4.96095
75	2021 (2.5 mg/mL)	6.92899
85	2021 (2.5 mg/mL)	3.64307
90	2021 (2.5 mg/mL)	4.85795
102	2021 (2.5 mg/mL)	6.68265
113	2021 (2.5 mg/mL)	6.68854
119	2021 (2.5 mg/mL)	5.25634
121	2021 (2.5 mg/mL)	5.76304
5	2021 (1mg/mL)	6.32589
8	2021 (1mg/mL)	5.7715
12	2021 (1mg/mL)	5.97938
44	2021 (1mg/mL)	7.89974
46	2021 (1mg/mL)	6.319
64	2021 (1mg/mL)	7.20096
76	2021 (1mg/mL)	6.39086
87	2021 (1mg/mL)	5.15226
103	2021 (1mg/mL)	5.89794
108	2021 (1mg/mL)	5.44269
110	2021 (1mg/mL)	5.77451
114	2021 (1mg/mL)	6.39124
115	2021 (1mg/mL)	5.54596
116	2021 (1mg/mL)	4.33224
15	2021 (0.25mg/mL)	6.49614
17	2021 (0.25mg/mL)	5.02301
24	2021 (0.25mg/mL)	6.49315
26	2021 (0.25mg/mL)	5.14152
30	2021 (0.25mg/mL)	5.85128
32	2021 (0.25mg/mL)	3.86571
41	2021 (0.25mg/mL)	5.57724
48	2021 (0.25mg/mL)	5.47286
50	2021 (0.25mg/mL)	4.61127
72	2021 (0.25mg/mL)	5.70373
81	2021 (0.25mg/mL)	6.25186
83	2021 (0.25mg/mL)	5.99957
89	2021 (0.25mg/mL)	5.01471
96	2021 (0.25mg/mL)	4.04575
123	2021 (0.25mg/mL)	6.15175

## Sheet: Panel F
Animal	Treatment (Dose)	Steatosis / Lipids (Area%)
134	None	1.05764
135	None	0.675983
136	None	0.542357
137	None	0.924143
138	None	1.06591
11	Isotype ctrl	19.0575
16	Isotype ctrl	14.2636
19	Isotype ctrl	17.5375
21	Isotype ctrl	21.8143
22	Isotype ctrl	23.2749
28	Isotype ctrl	20.4092
29	Isotype ctrl	18.5253
36	Isotype ctrl	20.2635
38	Isotype ctrl	17.4333
42	Isotype ctrl	20.1327
49	Isotype ctrl	18.9155
66	Isotype ctrl	21.5671
80	Isotype ctrl	17.4889
82	Isotype ctrl	17.6082
111	Isotype ctrl	22.8573
112	Isotype ctrl	19.679
117	Isotype ctrl	24.1417
7	0361 (25 mg/mL)	18.1583
9	0361 (25 mg/mL)	17.8024
13	0361 (25 mg/mL)	22.0958
27	0361 (25 mg/mL)	20.6633
37	0361 (25 mg/mL)	16.2094
39	0361 (25 mg/mL)	18.8228
54	0361 (25 mg/mL)	17.8217
68	0361 (25 mg/mL)	15.59
71	0361 (25 mg/mL)	19.2695
94	0361 (25 mg/mL)	14.9556
99	0361 (25 mg/mL)	19.1719
105	0361 (25 mg/mL)	13.4788
120	0361 (25 mg/mL)	17.1565
3	0361 (2.5 mg/mL)	18.4053
31	0361 (2.5 mg/mL)	14.4085
33	0361 (2.5 mg/mL)	22.5026
34	0361 (2.5 mg/mL)	18.0446
35	0361 (2.5 mg/mL)	19.751
65	0361 (2.5 mg/mL)	19.9119
67	0361 (2.5 mg/mL)	19.2973
77	0361 (2.5 mg/mL)	18.8838
84	0361 (2.5 mg/mL)	17.8749
86	0361 (2.5 mg/mL)	20.3955
93	0361 (2.5 mg/mL)	15.3705
97	0361 (2.5 mg/mL)	24.392
118	0361 (2.5 mg/mL)	21.0731
6	0361 (1 mg/mL)	17.1962
23	0361 (1 mg/mL)	15.6021
25	0361 (1 mg/mL)	23.1887
43	0361 (1 mg/mL)	15.7162
45	0361 (1 mg/mL)	19.2676
47	0361 (1 mg/mL)	17.6178
56	0361 (1 mg/mL)	26.2747
59	0361 (1 mg/mL)	19.0506
62	0361 (1 mg/mL)	13.2119
70	0361 (1 mg/mL)	12.0029
73	0361 (1 mg/mL)	18.6244
88	0361 (1 mg/mL)	19.3944
95	0361 (1 mg/mL)	19.7429
106	0361 (1 mg/mL)	16.7467
122	0361 (1 mg/mL)	18.1731
18	2021 (25 mg/mL)	13.7987
51	2021 (25 mg/mL)	13.7113
53	2021 (25 mg/mL)	13.5842
57	2021 (25 mg/mL)	24.7203
58	2021 (25 mg/mL)	20.1319
60	2021 (25 mg/mL)	15.3643
61	2021 (25 mg/mL)	16.8495
63	2021 (25 mg/mL)	20.3681
79	2021 (25 mg/mL)	18.4557
91	2021 (25 mg/mL)	17.2529
92	2021 (25 mg/mL)	15.9068
100	2021 (25 mg/mL)	21.8909
109	2021 (25 mg/mL)	18.915
2	2021 (2.5 mg/mL)	16.3206
4	2021 (2.5 mg/mL)	19.7354
10	2021 (2.5 mg/mL)	10.4315
20	2021 (2.5 mg/mL)	21.9789
40	2021 (2.5 mg/mL)	17.7684
52	2021 (2.5 mg/mL)	15.597
69	2021 (2.5 mg/mL)	21.5702
74	2021 (2.5 mg/mL)	22.1162
75	2021 (2.5 mg/mL)	19.3266
85	2021 (2.5 mg/mL)	13.2871
90	2021 (2.5 mg/mL)	20.5699
102	2021 (2.5 mg/mL)	21.1996
113	2021 (2.5 mg/mL)	19.2109
119	2021 (2.5 mg/mL)	20.147
121	2021 (2.5 mg/mL)	17.6954
5	2021 (1mg/mL)	17.5158
8	2021 (1mg/mL)	14.1526
12	2021 (1mg/mL)	18.8955
44	2021 (1mg/mL)	25.0363
46	2021 (1mg/mL)	18.3945
64	2021 (1mg/mL)	22.8753
76	2021 (1mg/mL)	19.9664
87	2021 (1mg/mL)	18.2878
103	2021 (1mg/mL)	20.7392
108	2021 (1mg/mL)	18.3523
110	2021 (1mg/mL)	13.7889
114	2021 (1mg/mL)	15.9302
115	2021 (1mg/mL)	20.4749
116	2021 (1mg/mL)	12.6866
15	2021 (0.25mg/mL)	18.3477
17	2021 (0.25mg/mL)	14.8408
24	2021 (0.25mg/mL)	21.1679
26	2021 (0.25mg/mL)	17.5729
30	2021 (0.25mg/mL)	18.518
32	2021 (0.25mg/mL)	10.8613
41	2021 (0.25mg/mL)	18.2848
48	2021 (0.25mg/mL)	17.9404
50	2021 (0.25mg/mL)	14.9248
72	2021 (0.25mg/mL)	18.0224
81	2021 (0.25mg/mL)	19.0972
83	2021 (0.25mg/mL)	19.9606
89	2021 (0.25mg/mL)	13.795
96	2021 (0.25mg/mL)	11.3601
123	2021 (0.25mg/mL)	16.769

## Sheet: Panel G
Animal	Treatment (Dose)	PSR fibrosis (Area%)
134	None	1.14034
135	None	0.93181
136	None	0.724643
137	None	1.33092
138	None	1.49017
11	Isotype ctrl	5.94198
16	Isotype ctrl	4.74467
19	Isotype ctrl	3.46595
21	Isotype ctrl	2.47509
22	Isotype ctrl	4.8032
28	Isotype ctrl	5.66236
29	Isotype ctrl	3.74823
36	Isotype ctrl	6.21307
38	Isotype ctrl	5.61892
42	Isotype ctrl	5.64872
49	Isotype ctrl	6.9368
66	Isotype ctrl	4.53649
80	Isotype ctrl	6.61595
82	Isotype ctrl	9.12243
111	Isotype ctrl	3.54638
112	Isotype ctrl	6.32417
117	Isotype ctrl	3.96157
7	0361 (25 mg/mL)	2.70548
9	0361 (25 mg/mL)	4.43396
13	0361 (25 mg/mL)	5.12309
27	0361 (25 mg/mL)	4.86681
37	0361 (25 mg/mL)	5.39823
39	0361 (25 mg/mL)	5.01307
54	0361 (25 mg/mL)	4.3707
68	0361 (25 mg/mL)	6.25093
71	0361 (25 mg/mL)	3.37861
94	0361 (25 mg/mL)	3.43813
99	0361 (25 mg/mL)	5.99935
105	0361 (25 mg/mL)	5.24654
120	0361 (25 mg/mL)	4.96944
3	0361 (2.5 mg/mL)	4.88217
31	0361 (2.5 mg/mL)	8.63122
33	0361 (2.5 mg/mL)	3.56866
34	0361 (2.5 mg/mL)	2.69886
35	0361 (2.5 mg/mL)	4.46513
65	0361 (2.5 mg/mL)	8.05122
67	0361 (2.5 mg/mL)	7.06298
77	0361 (2.5 mg/mL)	3.51215
84	0361 (2.5 mg/mL)	5.35703
86	0361 (2.5 mg/mL)	5.67618
93	0361 (2.5 mg/mL)	10.541
97	0361 (2.5 mg/mL)	3.51296
118	0361 (2.5 mg/mL)	4.11066
6	0361 (1 mg/mL)	6.61616
23	0361 (1 mg/mL)	9.57686
25	0361 (1 mg/mL)	5.15713
43	0361 (1 mg/mL)	9.54666
45	0361 (1 mg/mL)	3.14104
47	0361 (1 mg/mL)	3.07471
56	0361 (1 mg/mL)	1.80917
59	0361 (1 mg/mL)	3.6181
62	0361 (1 mg/mL)	9.9256
70	0361 (1 mg/mL)	5.88418
73	0361 (1 mg/mL)	6.70539
88	0361 (1 mg/mL)	4.89889
95	0361 (1 mg/mL)	4.89563
106	0361 (1 mg/mL)	8.977
122	0361 (1 mg/mL)	6.13008
18	2021 (25 mg/mL)	8.41944
51	2021 (25 mg/mL)	9.94094
53	2021 (25 mg/mL)	8.38266
57	2021 (25 mg/mL)	2.75872
58	2021 (25 mg/mL)	5.46922
60	2021 (25 mg/mL)	6.55543
61	2021 (25 mg/mL)	7.94337
63	2021 (25 mg/mL)	3.05821
79	2021 (25 mg/mL)	4.96067
91	2021 (25 mg/mL)	9.68709
92	2021 (25 mg/mL)	8.94358
100	2021 (25 mg/mL)	10.3828
109	2021 (25 mg/mL)	5.90209
2	2021 (2.5 mg/mL)	2.7012
4	2021 (2.5 mg/mL)	5.01236
10	2021 (2.5 mg/mL)	12.2239
20	2021 (2.5 mg/mL)	3.83646
40	2021 (2.5 mg/mL)	3.99813
52	2021 (2.5 mg/mL)	6.75582
69	2021 (2.5 mg/mL)	2.99299
74	2021 (2.5 mg/mL)	3.20996
75	2021 (2.5 mg/mL)	5.44898
85	2021 (2.5 mg/mL)	10.0231
90	2021 (2.5 mg/mL)	4.21912
102	2021 (2.5 mg/mL)	5.38634
113	2021 (2.5 mg/mL)	8.71792
119	2021 (2.5 mg/mL)	2.84654
121	2021 (2.5 mg/mL)	6.34362
5	2021 (1mg/mL)	7.92567
8	2021 (1mg/mL)	7.90523
12	2021 (1mg/mL)	2.02804
44	2021 (1mg/mL)	3.65149
46	2021 (1mg/mL)	3.1595
64	2021 (1mg/mL)	1.84614
76	2021 (1mg/mL)	6.12549
87	2021 (1mg/mL)	6.50582
103	2021 (1mg/mL)	6.03693
108	2021 (1mg/mL)	5.65612
110	2021 (1mg/mL)	8.06128
114	2021 (1mg/mL)	12.7413
115	2021 (1mg/mL)	5.82278
116	2021 (1mg/mL)	6.51579
15	2021 (0.25mg/mL)	6.87057
17	2021 (0.25mg/mL)	4.03031
24	2021 (0.25mg/mL)	3.33108
26	2021 (0.25mg/mL)	6.75599
30	2021 (0.25mg/mL)	3.02377
32	2021 (0.25mg/mL)	4.54047
41	2021 (0.25mg/mL)	3.81482
48	2021 (0.25mg/mL)	3.45006
50	2021 (0.25mg/mL)	5.8394
72	2021 (0.25mg/mL)	4.29204
81	2021 (0.25mg/mL)	6.83632
83	2021 (0.25mg/mL)	4.92646
89	2021 (0.25mg/mL)	9.37149
96	2021 (0.25mg/mL)	12.7291
123	2021 (0.25mg/mL)	6.81427

## Sheet: Panel H
Animal	Treatment (Dose)	CD45 (Area%)
134	None	1.02848
135	None	0.636842
136	None	0.75908
137	None	2.24422
138	None	1.63282
11	Isotype ctrl	5.61798
16	Isotype ctrl	5.30394
19	Isotype ctrl	9.32137
21	Isotype ctrl	6.72806
22	Isotype ctrl	1.59861
28	Isotype ctrl	2.89217
29	Isotype ctrl	4.19971
36	Isotype ctrl	3.81291
38	Isotype ctrl	4.33056
42	Isotype ctrl	2.76827
49	Isotype ctrl	4.38782
66	Isotype ctrl	2.70478
80	Isotype ctrl	3.30876
82	Isotype ctrl	7.84651
111	Isotype ctrl	5.81493
112	Isotype ctrl	7.40718
117	Isotype ctrl	5.16712
7	0361 (25 mg/mL)	4.44997
9	0361 (25 mg/mL)	6.18192
13	0361 (25 mg/mL)	2.89004
27	0361 (25 mg/mL)	2.89566
37	0361 (25 mg/mL)	3.89868
39	0361 (25 mg/mL)	4.17442
54	0361 (25 mg/mL)	1.55416
68	0361 (25 mg/mL)	3.15629
71	0361 (25 mg/mL)	3.6959
94	0361 (25 mg/mL)	5.82092
99	0361 (25 mg/mL)	4.53477
105	0361 (25 mg/mL)	5.68596
120	0361 (25 mg/mL)	5.24655
3	0361 (2.5 mg/mL)	1.84943
31	0361 (2.5 mg/mL)	3.91887
33	0361 (2.5 mg/mL)	1.93555
34	0361 (2.5 mg/mL)	3.26309
35	0361 (2.5 mg/mL)	4.86595
65	0361 (2.5 mg/mL)	3.98797
67	0361 (2.5 mg/mL)	4.6057
77	0361 (2.5 mg/mL)	4.44965
84	0361 (2.5 mg/mL)	6.90158
86	0361 (2.5 mg/mL)	6.43073
93	0361 (2.5 mg/mL)	9.67235
97	0361 (2.5 mg/mL)	7.82606
118	0361 (2.5 mg/mL)	15.8573
6	0361 (1 mg/mL)	NA
23	0361 (1 mg/mL)	NA
25	0361 (1 mg/mL)	2.06837
43	0361 (1 mg/mL)	3.3716
45	0361 (1 mg/mL)	4.0706
47	0361 (1 mg/mL)	4.32203
56	0361 (1 mg/mL)	1.48403
59	0361 (1 mg/mL)	2.8326
62	0361 (1 mg/mL)	5.46669
70	0361 (1 mg/mL)	5.17328
73	0361 (1 mg/mL)	4.80685
88	0361 (1 mg/mL)	7.60069
95	0361 (1 mg/mL)	8.74056
106	0361 (1 mg/mL)	6.11553
122	0361 (1 mg/mL)	5.5623
18	2021 (25 mg/mL)	5.14421
51	2021 (25 mg/mL)	4.19443
53	2021 (25 mg/mL)	6.01665
57	2021 (25 mg/mL)	4.98627
58	2021 (25 mg/mL)	5.41009
60	2021 (25 mg/mL)	2.29335
61	2021 (25 mg/mL)	4.85234
63	2021 (25 mg/mL)	3.53784
79	2021 (25 mg/mL)	5.1043
91	2021 (25 mg/mL)	5.1673
92	2021 (25 mg/mL)	5.25933
100	2021 (25 mg/mL)	3.71732
109	2021 (25 mg/mL)	5.46002
2	2021 (2.5 mg/mL)	3.91865
4	2021 (2.5 mg/mL)	2.82166
10	2021 (2.5 mg/mL)	4.26073
20	2021 (2.5 mg/mL)	4.07713
40	2021 (2.5 mg/mL)	4.4569
52	2021 (2.5 mg/mL)	6.10317
69	2021 (2.5 mg/mL)	2.18739
74	2021 (2.5 mg/mL)	2.39878
75	2021 (2.5 mg/mL)	2.8857
85	2021 (2.5 mg/mL)	4.84141
90	2021 (2.5 mg/mL)	3.14113
102	2021 (2.5 mg/mL)	4.15372
113	2021 (2.5 mg/mL)	5.13903
119	2021 (2.5 mg/mL)	5.17554
121	2021 (2.5 mg/mL)	4.9438
5	2021 (1mg/mL)	2.94294
8	2021 (1mg/mL)	3.28704
12	2021 (1mg/mL)	2.19707
44	2021 (1mg/mL)	3.45132
46	2021 (1mg/mL)	4.12935
64	2021 (1mg/mL)	6.05783
76	2021 (1mg/mL)	5.25892
87	2021 (1mg/mL)	10.0939
103	2021 (1mg/mL)	3.5533
108	2021 (1mg/mL)	9.02698
110	2021 (1mg/mL)	9.06415
114	2021 (1mg/mL)	6.8038
115	2021 (1mg/mL)	8.67801
116	2021 (1mg/mL)	7.62535
15	2021 (0.25mg/mL)	3.87428
17	2021 (0.25mg/mL)	6.11888
24	2021 (0.25mg/mL)	3.24057
26	2021 (0.25mg/mL)	3.30297
30	2021 (0.25mg/mL)	6.40042
32	2021 (0.25mg/mL)	6.83875
41	2021 (0.25mg/mL)	5.65668
48	2021 (0.25mg/mL)	7.66667
50	2021 (0.25mg/mL)	9.20042
72	2021 (0.25mg/mL)	7.45677
81	2021 (0.25mg/mL)	5.00479
83	2021 (0.25mg/mL)	9.33582
89	2021 (0.25mg/mL)	10.3461
96	2021 (0.25mg/mL)	12.4347
123	2021 (0.25mg/mL)	10.748
