# Supplementary material for: Evaluation of Gremlin-1 as a therapeutic target in metabolic dysfunction-associated steatohepatitis
Source: eLife. 2024 Oct 3;13:RP95185. doi: 10.7554/eLife.95185 (PMC11449483; doi:10.7554/eLife.95185)
Supplement: Figure 6—figure supplement 1—source data 1. [file elife-95185-fig6-figsupp1-data1.xlsx]

## Sheet: Panel A
sample	condition	liver	concentration (ng/mL)
1-1	PBS	1	1485.11
1-2	TGFB1	1	1804.18
1-3	DMSO	1	1174.32
1-4	ALK5i	1	1017.69
1-5	Iso-Ab	1	1571.19
1-6	aG1	1	1177.98
2-1	PBS	2	873.996
2-2	TGFB1	2	687.142
2-3	DMSO	2	725.891
2-4	ALK5i	2	702.705
2-5	Iso-Ab	2	701.456
2-6	aG1	2	649.317
3-1	PBS	3	1176.52
3-2	TGFB1	3	1293.97
3-3	DMSO	3	1479.54
3-4	ALK5i	3	1319.88
3-5	Iso-Ab	3	1430.2
3-6	aG1	3	1313.19
4-1	PBS	4	1013.65
4-2	TGFB1	4	782.845
4-3	DMSO	4	1031.11
4-4	ALK5i	4	1226.8
4-5	Iso-Ab	4	1280.99
4-6	aG1	4	1099.58
5-1	PBS	5	1545.7
5-2	TGFB1	5	1797.55
5-3	DMSO	5	2138.25
5-4	ALK5i	5	1652.7
5-5	Iso-Ab	5	2765.82
5-6	aG1	5	1652.51
6-1	PBS	6	967.901
6-2	TGFB1	6	757.424
6-3	DMSO	6	1034.29
6-4	ALK5i	6	1019.12
6-5	Iso-Ab	6	700.214
6-6	aG1	6	705.833

## Sheet: Panel B
sample	cond	liver	AST (U/L)
1-1	PBS	1	135.917
1-2	TGFB1	1	87.8603
1-3	DMSO	1	77.6527
1-4	ALK5i	1	97.7642
1-5	Iso-Ab	1	119.01
1-6	aG1	1	98.3107
2-1	PBS	2	83.7979
2-2	TGFB1	2	56.8386
2-3	DMSO	2	47.7742
2-4	ALK5i	2	46.8534
2-5	Iso-Ab	2	53.8658
2-6	aG1	2	52.8104
3-1	PBS	3	34.685
3-2	TGFB1	3	43.5874
3-3	DMSO	3	30.5313
3-4	ALK5i	3	40.0773
3-5	Iso-Ab	3	40.0304
3-6	aG1	3	27.3254
4-1	PBS	4	26.5493
4-2	TGFB1	4	17.8897
4-3	DMSO	4	21.7365
4-4	ALK5i	4	30.8393
4-5	Iso-Ab	4	34.5294
4-6	aG1	4	30.5393
5-1	PBS	5	73.5092
5-2	TGFB1	5	61.0567
5-3	DMSO	5	50.0497
5-4	ALK5i	5	59.6848
5-5	Iso-Ab	5	69.1331
5-6	aG1	5	45.3628
6-1	PBS	6	46.8435
6-2	TGFB1	6	39.6603
6-3	DMSO	6	69.4662
6-4	ALK5i	6	62.5671
6-5	Iso-Ab	6	49.8585
6-6	aG1	6	38.5194
pos_contr	NA	NA	246.697
