# Supplementary material for: Evaluation of Gremlin-1 as a therapeutic target in metabolic dysfunction-associated steatohepatitis
Source: eLife. 2024 Oct 3;13:RP95185. doi: 10.7554/eLife.95185 (PMC11449483; doi:10.7554/eLife.95185)
Supplement: Figure 6—figure supplement 2—source data 1. [file elife-95185-fig6-figsupp2-data1.xlsx]

## Sheet: Panel A
sample	treatment	Count_1	Count_2	mean
1-1	PBS	288	272	280
1-2	PBS	280	272	276
1-3	PBS	280	296	288
1-4	PBS	249	311	280
1-5	PBS	241	272	256.5
1-6	PBS	241	249	245
2-1	TGFb1	343	202	272.5
2-2	TGFb1	257	280	268.5
2-3	TGFb1	257	233	245
2-4	TGFb1	210	241	225.5
2-5	TGFb1	257	304	280.5
2-6	TGFb1	272	249	260.5
3-1	DMSO	272	311	291.5
3-2	DMSO	218	249	233.5
3-3	DMSO	218	257	237.5
3-4	DMSO	226	272	249
3-5	DMSO	210	233	221.5
3-6	DMSO	272	265	268.5
4-1	ALK5i	288	265	276.5
4-2	ALK5i	241	233	237
4-3	ALK5i	265	194	229.5
4-4	ALK5i	311	218	264.5
4-5	ALK5i	257	265	261
4-6	ALK5i	257	335	296
5-1	Iso-Ab	311	327	319
5-2	Iso-Ab	288	280	284
5-3	Iso-Ab	241	272	256.5
5-4	Iso-Ab	249	233	241
5-5	Iso-Ab	210	226	218
5-6	Iso-Ab	249	218	233.5
6-1	aG1-Ab	288	319	303.5
6-2	aG1-Ab	311	311	311
6-3	aG1-Ab	265	257	261
6-4	aG1-Ab	233	327	280
6-5	aG1-Ab	249	241	245
6-6	aG1-Ab	272	265	268.5
Medium	n.a.	319	241	280
