# Supplementary material for: Evaluation of Gremlin-1 as a therapeutic target in metabolic dysfunction-associated steatohepatitis
Source: eLife. 2024 Oct 3;13:RP95185. doi: 10.7554/eLife.95185 (PMC11449483; doi:10.7554/eLife.95185)
Supplement: Figure 6—source data 1. [file elife-95185-fig6-data1.xlsx]

## Sheet: Panel B (-DeltaDeltaCt)
Sample Name	CLR	Treatment	ACTA2	COL1A1	TIMP1
1-1	7410	PBS	0.70158	2.47449	5.6282
1-2	7410	TGF	1.66219	2.80359	5.72749
1-3	7410	DMSO	1.41287	2.72448	5.44143
1-4	7410	ALK5i	0.123671	1.81912	5.0554
1-5	7410	IMC	1.48324	2.64076	5.77034
1-6	7410	aG1	0.971494	2.33424	5.42701
2-1	7461	PBS	-0.0762052	1.59299	5.11134
2-2	7461	TGF	0.0259622	2.05425	5.32465
2-3	7461	DMSO	0.0613154	1.94194	5.19552
2-4	7461	ALK5i	-0.499125	0.81057	4.68065
2-5	7461	IMC	0.149812	2.07374	5.22293
2-6	7461	aG1	0.206234	2.10621	5.25621
3-1	7468	PBS	-0.31134	1.73548	5.03702
3-2	7468	TGF	0.263457	2.37904	5.42316
3-3	7468	DMSO	0.208717	2.46179	5.45563
3-4	7468	ALK5i	0.274152	0.605231	4.59295
3-5	7468	IMC	0.325591	2.29107	5.4189
3-6	7468	aG1	0.294571	2.30139	5.39167
4-1	7552	PBS	0.401098	1.81783	4.49802
4-2	7552	TGF	0.592933	2.01094	4.79327
4-3	7552	DMSO	0.140812	1.51099	4.37933
4-4	7552	ALK5i	-0.633623	0.46387	3.90426
4-5	7552	IMC	0.374918	1.89354	4.47267
4-6	7552	aG1	0.693531	2.06684	4.7318
5-1	7656	PBS	0.812615	2.83886	5.50679
5-2	7656	TGF	1.14051	2.9583	5.67623
5-3	7656	DMSO	0.849454	3.16267	5.37665
5-4	7656	ALK5i	-0.512783	1.7973	4.61612
5-5	7656	IMC	1.00826	3.12347	5.48861
5-6	7656	aG1	1.01249	2.89709	5.56091
6-1	7663	PBS	0.247849	2.37831	5.36762
6-2	7663	TGF	0.299571	2.48366	5.34443
6-3	7663	DMSO	0.0915734	2.44077	5.43341
6-4	7663	ALK5i	-0.813327	1.36871	5.01808
6-5	7663	IMC	0.12113	2.89905	5.56618
6-6	7663	aG1	0.422106	2.64882	5.46254

## Sheet: Panel C
Sample Name	CLR	pg/ml pro-collagen1
1-1	7410	14951.8
1-2	7410	41572.6
1-3	7410	27074.4
1-4	7410	18810.3
1-5	7410	13209.8
1-6	7410	12115.6
2-1	7461	5089.64
2-2	7461	6097.45
2-3	7461	9207.29
2-4	7461	3419.54
2-5	7461	5478.37
2-6	7461	5795.11
3-1	7468	n.d.
3-2	7468	3289.97
3-3	7468	4254.59
3-4	7468	2310.94
3-5	7468	7162.86
3-6	7468	11626
4-1	7552	n.d.
4-2	7552	n.d.
4-3	7552	n.d.
4-4	7552	n.d.
4-5	7552	122.543
4-6	7552	1965.41
5-1	7656	9092.11
5-2	7656	14188.8
5-3	7656	12691.5
5-4	7656	8976.93
5-5	7656	10819.8
5-6	7656	14347.1
6-1	7663	5939.08
6-2	7663	2598.89
6-3	7663	4441.76
6-4	7663	1447.1
6-5	7663	8415.43
6-6	7663	9898.36

## Sheet: Panel DE
	baseMean	log2FoldChange	lfcSE	stat	pvalue	padj	ENSEMBL	SYMBOL
ENSG00000181904.9	68.1596	2.82629	0.474961	5.95058	2.67193e-09	4.05231e-05	ENSG00000181904	C5orf24
ENSG00000196440.11	32.1727	-2.94986	0.497275	-5.93204	2.99185e-09	4.05231e-05	ENSG00000196440	ARMCX4
ENSG00000227036.8	118.351	-2.78575	0.488242	-5.70567	1.15886e-08	0.000104641	ENSG00000227036	LINC00511
ENSG00000084693.16	51.5499	-2.35704	0.456778	-5.16015	2.46758e-07	0.00167111	ENSG00000084693	AGBL5
ENSG00000132128.16	1169.62	-0.349806	0.0836146	-4.18355	2.8699e-05	0.155486	ENSG00000132128	LRRC41
ENSG00000100097.12	13.4106	3.09248	0.755929	4.09097	4.29575e-05	0.193946	ENSG00000100097	LGALS1
ENSG00000182446.14	57.358	2.03801	0.50282	4.05317	5.0529e-05	0.19554	ENSG00000182446	NPLOC4
ENSG00000002933.9	194.583	3.17848	0.822082	3.86638	0.000110462	0.374039	ENSG00000002933	TMEM176A
ENSG00000154917.11	15.4681	-4.15015	1.16563	-3.56043	0.000370251	0.974066	ENSG00000154917	RAB6B
ENSG00000162409.11	37.0355	-10.8239	3.03679	-3.56427	0.000364868	0.974066	ENSG00000162409	PRKAA2
ENSG00000166136.16	703.668	0.320273	0.0903948	3.54304	0.000395538	0.974066	ENSG00000166136	NDUFB8
ENSG00000000003.15	23.869	-0.0659987	0.427482	-0.154389	0.877303	0.999872	ENSG00000000003	TSPAN6
ENSG00000000457.14	0.157599	-0.321239	3.10138	-0.10358	0.917503	0.999872	ENSG00000000457	SCYL3
ENSG00000000460.17	10.9045	0.0768985	0.549769	0.139874	0.888759	0.999872	ENSG00000000460	C1orf112
ENSG00000000938.13	0.0587645	0.288426	3.11445	0.0926088	0.926214	0.999872	ENSG00000000938	FGR
ENSG00000000971.16	409.773	0.010751	0.133354	0.0806203	0.935744	0.999872	ENSG00000000971	CFH
ENSG00000001036.14	0.29174	0.981097	3.09093	0.317412	0.750931	0.999872	ENSG00000001036	FUCA2
ENSG00000001084.13	260.677	-0.0374979	0.164644	-0.227751	0.81984	0.999872	ENSG00000001084	GCLC
ENSG00000001167.14	56.9826	-0.0581593	0.256588	-0.226664	0.820685	0.999872	ENSG00000001167	NFYA
ENSG00000001460.18	6.24863	0.198687	0.883436	0.224902	0.822055	0.999872	ENSG00000001460	STPG1
ENSG00000001461.17	60.1644	0.137667	0.280233	0.491259	0.623243	0.999872	ENSG00000001461	NIPAL3
ENSG00000001497.18	183.191	0.0541121	0.216753	0.249649	0.802859	0.999872	ENSG00000001497	LAS1L
ENSG00000001626.16	0.863997	0.562027	3.06157	0.183575	0.854347	0.999872	ENSG00000001626	CFTR
ENSG00000001629.10	3.15487	-1.2521	1.27488	-0.982133	0.326034	0.999872	ENSG00000001629	ANKIB1
ENSG00000001630.17	0.3505	-1.31181	3.08535	-0.425175	0.670709	0.999872	ENSG00000001630	CYP51A1
ENSG00000001631.16	159.543	0.000210473	0.20556	0.0010239	0.999183	0.999872	ENSG00000001631	KRIT1
ENSG00000002016.18	0.683002	0.0809918	3.08185	0.0262803	0.979034	0.999872	ENSG00000002016	RAD52
ENSG00000002079.14	6.27749	1.35559	0.867779	1.56214	0.118256	0.999872	ENSG00000002079	MYH16
ENSG00000002330.14	143.938	0.0861586	0.166261	0.518214	0.604309	0.999872	ENSG00000002330	BAD
ENSG00000002549.12	215.229	0.130252	0.192737	0.675802	0.499167	0.999872	ENSG00000002549	LAP3
ENSG00000002586.20	22.2701	-0.210801	0.390366	-0.54001	0.58919	0.999872	ENSG00000002586	CD99
ENSG00000002726.21	0.120071	-0.0431232	3.09017	-0.013955	0.988866	0.999872	ENSG00000002726	AOC1
ENSG00000002745.13	0.267745	-0.253473	3.07732	-0.082368	0.934354	0.999872	ENSG00000002745	WNT16
ENSG00000002746.15	3.26775	0.790342	1.33242	0.593164	0.553071	0.999872	ENSG00000002746	HECW1
ENSG00000002822.15	75.0951	0.105716	0.250361	0.422252	0.672841	0.999872	ENSG00000002822	MAD1L1
ENSG00000002834.18	9.71327	0.160147	0.680196	0.235442	0.813865	0.999872	ENSG00000002834	LASP1
ENSG00000002919.15	91.2851	0.114487	0.210857	0.542957	0.587159	0.999872	ENSG00000002919	SNX11
ENSG00000003056.8	176.953	-0.21196	0.257878	-0.821939	0.411112	0.999872	ENSG00000003056	M6PR
ENSG00000003096.14	7.00035	0.449819	0.673362	0.668019	0.504121	0.999872	ENSG00000003096	KLHL13
ENSG00000003137.8	53.605	0.181427	0.374561	0.484371	0.628122	0.999872	ENSG00000003137	CYP26B1
ENSG00000003147.19	50.6786	0.170501	0.282429	0.603695	0.546047	0.999872	ENSG00000003147	ICA1
ENSG00000003249.15	0.12047	-0.134985	3.1126	-0.0433673	0.965409	0.999872	ENSG00000003249	DBNDD1
ENSG00000003393.15	9.08986	-0.0939519	0.760141	-0.123598	0.901634	0.999872	ENSG00000003393	ALS2
ENSG00000003400.15	4.17842	1.11169	1.01049	1.10015	0.271268	0.999872	ENSG00000003400	CASP10
ENSG00000003402.20	492.709	-0.0155105	0.126722	-0.122398	0.902584	0.999872	ENSG00000003402	CFLAR
ENSG00000003436.16	1009.27	-0.0976108	0.133418	-0.731615	0.464404	0.999872	ENSG00000003436	TFPI
ENSG00000003509.16	36.1262	0.380345	0.360448	1.0552	0.291334	0.999872	ENSG00000003509	NDUFAF7
ENSG00000003756.17	30.6923	-0.293694	0.363535	-0.807886	0.419156	0.999872	ENSG00000003756	RBM5
ENSG00000003987.14	0.179972	-1.29359	3.09665	-0.417739	0.676138	0.999872	ENSG00000003987	MTMR7
ENSG00000003989.18	21.4902	-1.94179	3.06808	-0.632902	0.526798	0.999872	ENSG00000003989	SLC7A2
ENSG00000004059.11	0.217693	-1.21736	3.09816	-0.392929	0.694372	0.999872	ENSG00000004059	ARF5
ENSG00000004399.13	214.304	0.0984853	0.222847	0.441942	0.658531	0.999872	ENSG00000004399	PLXND1
ENSG00000004455.17	809.331	0.0923459	0.0891173	1.03623	0.300095	0.999872	ENSG00000004455	AK2
ENSG00000004468.13	3.95751	3.19319	1.86692	1.7104	0.0871918	0.999872	ENSG00000004468	CD38
ENSG00000004478.8	4.19059	0.39349	1.21759	0.323171	0.746566	0.999872	ENSG00000004478	FKBP4
ENSG00000004487.17	189.282	0.0477321	0.16273	0.293321	0.769277	0.999872	ENSG00000004487	KDM1A
ENSG00000004534.15	452.008	-0.0537293	0.115533	-0.465054	0.641893	0.999872	ENSG00000004534	RBM6
ENSG00000004660.15	15.4113	-0.328718	0.495014	-0.664059	0.506653	0.999872	ENSG00000004660	CAMKK1
ENSG00000004700.16	2.80603	1.52786	1.38875	1.10017	0.271259	0.999872	ENSG00000004700	RECQL
ENSG00000004766.17	49.6654	-0.0743443	0.304315	-0.244301	0.806998	0.999872	ENSG00000004766	VPS50
ENSG00000004777.18	15.4696	-0.263982	0.455743	-0.579235	0.562431	0.999872	ENSG00000004777	ARHGAP33
ENSG00000004779.10	1.87664	2.51501	1.69002	1.48815	0.136711	0.999872	ENSG00000004779	NDUFAB1
ENSG00000004799.8	0.908509	-0.414949	2.3395	-0.177367	0.85922	0.999872	ENSG00000004799	PDK4
ENSG00000004809.14	0.865297	-1.10355	3.04107	-0.36288	0.716694	0.999872	ENSG00000004809	SLC22A16
ENSG00000004838.14	1.41097	0.110492	1.71183	0.0645461	0.948535	0.999872	ENSG00000004838	ZMYND10
ENSG00000004846.16	0.21606	0.0617887	3.08012	0.0200605	0.983995	0.999872	ENSG00000004846	ABCB5
ENSG00000004848.8	0.0617059	-0.597806	3.11098	-0.19216	0.847617	0.999872	ENSG00000004848	ARX
ENSG00000004864.14	0.437607	-0.635033	3.07318	-0.206637	0.836293	0.999872	ENSG00000004864	SLC25A13
ENSG00000004866.22	95.0562	0.165669	0.200643	0.825688	0.408981	0.999872	ENSG00000004866	ST7
ENSG00000004897.12	0.321206	-1.54115	3.08635	-0.499344	0.617537	0.999872	ENSG00000004897	CDC27
ENSG00000004939.15	5.13908	0.721682	1.03618	0.696483	0.486126	0.999872	ENSG00000004939	SLC4A1
ENSG00000004961.15	183.212	0.115835	0.137811	0.840535	0.400609	0.999872	ENSG00000004961	HCCS
ENSG00000004975.12	2.23056	-0.245577	1.15719	-0.212219	0.831936	0.999872	ENSG00000004975	DVL2
ENSG00000005001.10	0.0988788	-0.135722	3.11253	-0.043605	0.965219	0.999872	ENSG00000005001	PRSS22
ENSG00000005007.13	4.21218	-0.696513	1.04464	-0.666753	0.50493	0.999872	ENSG00000005007	UPF1
ENSG00000005020.13	0.31936	-0.765508	3.06835	-0.249485	0.802986	0.999872	ENSG00000005020	SKAP2
ENSG00000005059.16	2.09021	0.749096	1.35075	0.554579	0.579183	0.999872	ENSG00000005059	MCUB
ENSG00000005075.15	402.9	-0.00370273	0.0997993	-0.0371018	0.970404	0.999872	ENSG00000005075	POLR2J
ENSG00000005100.13	0.350965	0.479062	3.08165	0.155457	0.876461	0.999872	ENSG00000005100	DHX33
ENSG00000005108.16	22.3588	-1.00409	2.99746	-0.334979	0.737641	0.999872	ENSG00000005108	THSD7A
ENSG00000005156.12	26.029	0.21343	0.426989	0.49985	0.617181	0.999872	ENSG00000005156	LIG3
ENSG00000005175.10	26.9626	0.182539	0.369614	0.493863	0.621403	0.999872	ENSG00000005175	RPAP3
ENSG00000005187.12	34.8289	-0.682876	0.535408	-1.27543	0.202157	0.999872	ENSG00000005187	ACSM3
ENSG00000005189.20	0.0661481	0.260191	3.11135	0.0836263	0.933354	0.999872	ENSG00000005189	REXO5
ENSG00000005194.15	1.6321	-0.904871	2.06573	-0.43804	0.661357	0.999872	ENSG00000005194	CIAPIN1
ENSG00000005206.17	5.22533	0.824952	1.06449	0.774977	0.438353	0.999872	ENSG00000005206	SPPL2B
ENSG00000005238.20	142.926	-0.102159	0.154402	-0.661647	0.508198	0.999872	ENSG00000005238	ATOSB
ENSG00000005243.10	45.2305	0.495964	0.410433	1.20839	0.226897	0.999872	ENSG00000005243	COPZ2
ENSG00000005249.13	0.456058	-0.387726	3.10294	-0.124954	0.90056	0.999872	ENSG00000005249	PRKAR2B
ENSG00000005302.19	32.2632	0.350173	0.639282	0.54776	0.583856	0.999872	ENSG00000005302	MSL3
ENSG00000005339.15	38.8044	-0.367396	0.332613	-1.10457	0.269344	0.999872	ENSG00000005339	CREBBP
ENSG00000005379.17	9.50826	-0.419256	0.727118	-0.5766	0.56421	0.999872	ENSG00000005379	TSPOAP1
ENSG00000005421.9	0.316978	-0.912511	3.07951	-0.296317	0.766988	0.999872	ENSG00000005421	PON1
ENSG00000005436.14	58.8667	-0.1062	0.35627	-0.298089	0.765635	0.999872	ENSG00000005436	GCFC2
ENSG00000005448.17	59.8882	-0.113412	0.275895	-0.411069	0.681022	0.999872	ENSG00000005448	WDR54
ENSG00000005469.12	8.74986	-0.725768	1.00665	-0.720973	0.470926	0.999872	ENSG00000005469	CROT
ENSG00000005471.19	124.535	-0.212168	0.265697	-0.798534	0.424561	0.999872	ENSG00000005471	ABCB4
ENSG00000005483.21	430.798	0.0897363	0.115771	0.775118	0.43827	0.999872	ENSG00000005483	KMT2E
ENSG00000005486.17	130.565	-0.206825	0.205128	-1.00827	0.313324	0.999872	ENSG00000005486	RHBDD2
ENSG00000005700.15	23.7734	-0.355235	0.376889	-0.942544	0.345914	0.999872	ENSG00000005700	IBTK
ENSG00000005801.18	70.8986	0.0675281	0.222118	0.304019	0.761114	0.999872	ENSG00000005801	ZNF195
ENSG00000005810.18	133.825	0.0972052	0.243346	0.399453	0.689559	0.999872	ENSG00000005810	MYCBP2
ENSG00000005812.11	42.5328	0.268011	0.407716	0.657348	0.510957	0.999872	ENSG00000005812	FBXL3
ENSG00000005844.19	2.95557	0.109474	1.00661	0.108756	0.913396	0.999872	ENSG00000005844	ITGAL
ENSG00000005882.12	23.527	-0.119299	0.400235	-0.298072	0.765649	0.999872	ENSG00000005882	PDK2
ENSG00000005884.18	580.368	-0.267557	0.121003	-2.21116	0.0270247	0.999872	ENSG00000005884	ITGA3
ENSG00000005889.16	118.469	-0.0379738	0.312854	-0.121379	0.903391	0.999872	ENSG00000005889	ZFX
ENSG00000005893.16	449.417	-0.136009	0.101503	-1.33995	0.180261	0.999872	ENSG00000005893	LAMP2
ENSG00000005961.19	0.870568	-2.10254	2.83641	-0.741266	0.458532	0.999872	ENSG00000005961	ITGA2B
ENSG00000006007.12	0.903143	0.884692	2.89443	0.305653	0.759869	0.999872	ENSG00000006007	GDE1
ENSG00000006015.18	277.956	0.052036	0.155059	0.335589	0.737181	0.999872	ENSG00000006015	REX1BD
ENSG00000006016.11	39.9652	-0.099548	0.32273	-0.308456	0.757735	0.999872	ENSG00000006016	CRLF1
ENSG00000006042.12	0.338606	-0.101365	3.08365	-0.0328717	0.973777	0.999872	ENSG00000006042	TMEM98
ENSG00000006071.15	0.508148	1.60463	3.06021	0.524353	0.600033	0.999872	ENSG00000006071	ABCC8
ENSG00000006118.15	154.872	-0.211607	0.172066	-1.2298	0.218773	0.999872	ENSG00000006118	TMEM132A
ENSG00000006125.18	664.668	0.093812	0.135561	0.692028	0.48892	0.999872	ENSG00000006125	AP2B1
ENSG00000006128.12	0.085591	-0.764333	3.10125	-0.246459	0.805327	0.999872	ENSG00000006128	TAC1
ENSG00000006194.10	6.35559	0.0237509	0.802839	0.0295837	0.976399	0.999872	ENSG00000006194	ZNF263
ENSG00000006210.7	1.28422	0.43459	2.57892	0.168516	0.866177	0.999872	ENSG00000006210	CX3CL1
ENSG00000006282.21	89.6042	0.0386526	0.203538	0.189904	0.849385	0.999872	ENSG00000006282	SPATA20
ENSG00000006283.18	3.77259	0.835754	0.996096	0.839029	0.401453	0.999872	ENSG00000006283	CACNA1G
ENSG00000006327.14	1213.7	-0.219836	0.0765186	-2.87297	0.00406633	0.999872	ENSG00000006327	TNFRSF12A
ENSG00000006432.15	32.9267	0.38557	0.306555	1.25775	0.208481	0.999872	ENSG00000006432	MAP3K9
ENSG00000006451.8	81.6646	-0.399184	0.284478	-1.40321	0.160553	0.999872	ENSG00000006451	RALA
ENSG00000006453.14	0.265407	1.58852	3.07653	0.516335	0.60562	0.999872	ENSG00000006453	BAIAP2L1
ENSG00000006468.14	33.6984	0.0237878	0.30422	0.0781927	0.937675	0.999872	ENSG00000006468	ETV1
ENSG00000006530.18	58.9208	0.822906	0.294113	2.79792	0.00514325	0.999872	ENSG00000006530	AGK
ENSG00000006534.16	72.985	-0.0790613	0.312756	-0.252789	0.800431	0.999872	ENSG00000006534	ALDH3B1
ENSG00000006555.11	0.599059	0.246479	3.04608	0.0809168	0.935508	0.999872	ENSG00000006555	TTC22
ENSG00000006576.16	50.1854	0.372249	0.288595	1.28987	0.197096	0.999872	ENSG00000006576	PHTF2
ENSG00000006607.14	108.212	-0.01468	0.208126	-0.0705341	0.943769	0.999872	ENSG00000006607	FARP2
ENSG00000006611.17	79.2324	-0.0110132	0.264536	-0.041632	0.966792	0.999872	ENSG00000006611	USH1C
ENSG00000006625.18	200.11	0.12534	0.130965	0.957048	0.338543	0.999872	ENSG00000006625	GGCT
ENSG00000006634.8	6.5196	1.0106	1.19411	0.84632	0.397374	0.999872	ENSG00000006634	DBF4
ENSG00000006638.13	57.2718	-0.0430185	0.327323	-0.131425	0.895439	0.999872	ENSG00000006638	TBXA2R
ENSG00000006652.15	216.403	-0.142827	0.169744	-0.841422	0.400111	0.999872	ENSG00000006652	IFRD1
ENSG00000006695.12	9.86132	-0.183824	0.601422	-0.305649	0.759872	0.999872	ENSG00000006695	COX10
ENSG00000006704.11	69.6986	0.645055	0.38253	1.68629	0.0917403	0.999872	ENSG00000006704	GTF2IRD1
ENSG00000006712.15	0.170751	0.0557455	3.10317	0.017964	0.985668	0.999872	ENSG00000006712	PAF1
ENSG00000006715.16	0.0661481	0.260191	3.11135	0.0836263	0.933354	0.999872	ENSG00000006715	VPS41
ENSG00000006740.17	29.9424	-0.0450767	0.361347	-0.124746	0.900724	0.999872	ENSG00000006740	ARHGAP44
ENSG00000006744.19	251.715	0.0314136	0.162176	0.1937	0.846411	0.999872	ENSG00000006744	ELAC2
ENSG00000006747.15	1.1441	-0.362373	3.03493	-0.119401	0.904958	0.999872	ENSG00000006747	SCIN
ENSG00000006756.16	12.562	0.144022	0.627345	0.229574	0.818423	0.999872	ENSG00000006756	ARSD
ENSG00000006757.12	84.829	0.2249	0.288921	0.778415	0.436325	0.999872	ENSG00000006757	PNPLA4
ENSG00000006831.10	2.04048	1.48193	2.39397	0.619025	0.5359	0.999872	ENSG00000006831	ADIPOR2
ENSG00000006837.12	4.66751	-1.41117	1.03075	-1.36908	0.170975	0.999872	ENSG00000006837	CDKL3
ENSG00000007001.13	7.17058	1.40907	0.833467	1.69061	0.0909109	0.999872	ENSG00000007001	UPP2
ENSG00000007038.11	1.01417	-1.66459	3.05016	-0.545738	0.585246	0.999872	ENSG00000007038	PRSS21
ENSG00000007047.15	143.548	-0.17862	0.177524	-1.00617	0.314333	0.999872	ENSG00000007047	MARK4
ENSG00000007062.12	27.4846	0.699949	0.901636	0.77631	0.437566	0.999872	ENSG00000007062	PROM1
ENSG00000007080.11	150.698	0.0242766	0.15374	0.157907	0.87453	0.999872	ENSG00000007080	CCDC124
ENSG00000007129.18	2.67574	-0.390209	1.18733	-0.328645	0.742424	0.999872	ENSG00000007129	CEACAM21
ENSG00000007168.14	79.4827	-0.00497604	0.258932	-0.0192175	0.984668	0.999872	ENSG00000007168	PAFAH1B1
ENSG00000007174.18	0.631839	2.09094	3.05773	0.683819	0.494089	0.999872	ENSG00000007174	DNAH9
ENSG00000007202.15	0.722352	-0.395507	1.92216	-0.205762	0.836977	0.999872	ENSG00000007202	BLTP2
ENSG00000007216.15	0.102116	0.249189	3.11175	0.0800799	0.936174	0.999872	ENSG00000007216	SLC13A2
ENSG00000007237.19	244.144	-0.00446651	0.13384	-0.0333719	0.973378	0.999872	ENSG00000007237	GAS7
ENSG00000007255.10	84.5271	0.0464109	0.220517	0.210464	0.833305	0.999872	ENSG00000007255	TRAPPC6A
ENSG00000007264.15	3.46475	-1.35644	1.21524	-1.11619	0.264339	0.999872	ENSG00000007264	MATK
ENSG00000007312.13	12.0186	1.1291	0.493134	2.28964	0.0220422	0.999872	ENSG00000007312	CD79B
ENSG00000007314.12	4.77135	-0.345776	0.816435	-0.423519	0.671917	0.999872	ENSG00000007314	SCN4A
ENSG00000007341.19	26.2988	0.185332	0.411514	0.450366	0.652446	0.999872	ENSG00000007341	ST7L
ENSG00000007350.17	0.809826	0.291552	2.84763	0.102384	0.918452	0.999872	ENSG00000007350	TKTL1
ENSG00000007372.24	0.901172	0.0969846	3.07895	0.0314993	0.974871	0.999872	ENSG00000007372	PAX6
ENSG00000007376.8	0.453152	0.607588	3.08144	0.197177	0.843689	0.999872	ENSG00000007376	RPUSD1
ENSG00000007384.15	116.154	0.00524364	0.222507	0.0235662	0.981199	0.999872	ENSG00000007384	RHBDF1
ENSG00000007392.17	113.872	-0.137527	0.408568	-0.336608	0.736413	0.999872	ENSG00000007392	LUC7L
ENSG00000007402.12	5.60018	0.195246	0.977708	0.199697	0.841718	0.999872	ENSG00000007402	CACNA2D2
ENSG00000007516.14	176.509	0.0206883	0.16985	0.121803	0.903055	0.999872	ENSG00000007516	BAIAP3
ENSG00000007520.4	0.434797	0.554923	3.08002	0.180169	0.85702	0.999872	ENSG00000007520	TSR3
ENSG00000007541.17	6.61434	-0.326848	0.863399	-0.37856	0.705015	0.999872	ENSG00000007541	PIGQ
ENSG00000007908.16	1.12806	-0.196418	1.53019	-0.128362	0.897863	0.999872	ENSG00000007908	SELE
ENSG00000007923.16	100.303	0.0882347	0.224181	0.393586	0.693887	0.999872	ENSG00000007923	DNAJC11
ENSG00000007933.13	0.994006	-0.0657699	1.60224	-0.0410486	0.967257	0.999872	ENSG00000007933	FMO3
ENSG00000007944.15	75.3498	-0.00249156	0.205966	-0.012097	0.990348	0.999872	ENSG00000007944	MYLIP
ENSG00000007952.18	23.0626	-0.505216	0.364623	-1.38558	0.165874	0.999872	ENSG00000007952	NOX1
ENSG00000008018.9	1.06218	-0.605519	2.39056	-0.253296	0.80004	0.999872	ENSG00000008018	PSMB1
ENSG00000008056.14	0.117529	0.431319	3.1018	0.139055	0.889407	0.999872	ENSG00000008056	SYN1
ENSG00000008083.14	308.736	0.0633784	0.133519	0.474678	0.635017	0.999872	ENSG00000008083	JARID2
ENSG00000008086.13	1.88656	2.05541	1.92141	1.06974	0.284737	0.999872	ENSG00000008086	CDKL5
ENSG00000008128.23	40.6101	-0.00354938	0.338122	-0.0104973	0.991624	0.999872	ENSG00000008128	CDK11A
ENSG00000008130.15	258.315	0.111758	0.131883	0.847406	0.396769	0.999872	ENSG00000008130	NADK
ENSG00000008226.20	246.197	0.174894	0.186536	0.937591	0.348455	0.999872	ENSG00000008226	DLEC1
ENSG00000008256.16	0.185118	-0.926901	3.10326	-0.298686	0.76518	0.999872	ENSG00000008256	CYTH3
ENSG00000008277.14	8.53642	0.326533	1.0689	0.305484	0.759997	0.999872	ENSG00000008277	ADAM22
ENSG00000008282.9	0.150215	-0.307421	3.10289	-0.0990756	0.921078	0.999872	ENSG00000008282	SYPL1
ENSG00000008283.16	0.0457255	-0.577147	3.10685	-0.185766	0.852628	0.999872	ENSG00000008283	CYB561
ENSG00000008294.21	135.967	0.434659	0.253197	1.71668	0.0860375	0.999872	ENSG00000008294	SPAG9
ENSG00000008300.17	0.408274	0.0582373	3.07456	0.0189417	0.984888	0.999872	ENSG00000008300	CELSR3
ENSG00000008311.15	22.7532	0.0263964	0.401678	0.0657152	0.947605	0.999872	ENSG00000008311	AASS
ENSG00000008323.15	7.97483	-0.327552	0.602781	-0.543401	0.586854	0.999872	ENSG00000008323	PLEKHG6
ENSG00000008324.12	257.684	0.0290633	0.126662	0.229455	0.818515	0.999872	ENSG00000008324	SS18L2
ENSG00000008382.16	44.2708	0.114178	0.336432	0.33938	0.734324	0.999872	ENSG00000008382	MPND
ENSG00000008394.13	3315.76	-0.12066	0.118365	-1.01939	0.308018	0.999872	ENSG00000008394	MGST1
ENSG00000008405.12	0.398383	0.026683	3.07042	0.00869034	0.993066	0.999872	ENSG00000008405	CRY1
ENSG00000008441.18	397.824	-0.0268967	0.118663	-0.226664	0.820685	0.999872	ENSG00000008441	NFIX
ENSG00000008513.16	775.9	-0.0167441	0.169995	-0.0984974	0.921537	0.999872	ENSG00000008513	ST3GAL1
ENSG00000008516.17	0.341501	0.0730263	3.08942	0.0236376	0.981142	0.999872	ENSG00000008516	MMP25
ENSG00000008517.18	9481.23	-0.266301	0.16501	-1.61385	0.106559	0.999872	ENSG00000008517	IL32
ENSG00000008710.20	65.354	-0.0805078	0.256042	-0.314431	0.753193	0.999872	ENSG00000008710	PKD1
ENSG00000008735.14	6.38929	0.074141	0.684878	0.108254	0.913794	0.999872	ENSG00000008735	MAPK8IP2
ENSG00000008838.20	126.307	-0.212241	0.187882	-1.12965	0.258622	0.999872	ENSG00000008838	MED24
ENSG00000008869.12	0.353652	-0.496741	3.08985	-0.160766	0.872278	0.999872	ENSG00000008869	HEATR5B
ENSG00000008952.17	1361.63	-0.0512757	0.111099	-0.461531	0.644417	0.999872	ENSG00000008952	SEC62
ENSG00000008988.11	222.163	0.0687086	0.157515	0.436202	0.66269	0.999872	ENSG00000008988	RPS20
ENSG00000009307.16	2148.27	0.049403	0.0738004	0.669414	0.503232	0.999872	ENSG00000009307	CSDE1
ENSG00000009335.18	92.1739	0.685013	0.267101	2.56462	0.0103288	0.999872	ENSG00000009335	UBE3C
ENSG00000009413.16	46.3434	-0.446251	0.472874	-0.9437	0.345323	0.999872	ENSG00000009413	REV3L
ENSG00000009694.13	15.8495	-0.0147341	0.620323	-0.0237523	0.98105	0.999872	ENSG00000009694	TENM1
ENSG00000009724.17	209.805	0.107126	0.217047	0.493562	0.621616	0.999872	ENSG00000009724	MASP2
ENSG00000009765.15	7.16966	0.835415	0.951668	0.877843	0.380029	0.999872	ENSG00000009765	IYD
ENSG00000009780.16	16.4486	-0.119641	0.840851	-0.142285	0.886855	0.999872	ENSG00000009780	FAM76A
ENSG00000009790.15	37.5108	0.173952	0.549525	0.31655	0.751585	0.999872	ENSG00000009790	TRAF3IP3
ENSG00000009830.12	1.1134	-0.785221	3.0495	-0.257492	0.796799	0.999872	ENSG00000009830	POMT2
ENSG00000009844.16	157.944	0.0551822	0.183041	0.301474	0.763053	0.999872	ENSG00000009844	VTA1
ENSG00000009950.16	264.535	0.140022	0.206953	0.676589	0.498667	0.999872	ENSG00000009950	MLXIPL
ENSG00000009954.11	10.1838	0.870299	0.633022	1.37483	0.169184	0.999872	ENSG00000009954	BAZ1B
ENSG00000010017.13	0.716711	-1.77696	3.05861	-0.58097	0.56126	0.999872	ENSG00000010017	RANBP9
ENSG00000010030.14	4.20136	-0.25283	0.80287	-0.314908	0.752832	0.999872	ENSG00000010030	ETV7
ENSG00000010072.16	11.4706	0.357882	0.582371	0.614526	0.538868	0.999872	ENSG00000010072	SPRTN
ENSG00000010165.20	123.332	0.224284	0.241565	0.92846	0.353169	0.999872	ENSG00000010165	METTL13
ENSG00000010219.13	116.342	0.00478583	0.184639	0.0259199	0.979321	0.999872	ENSG00000010219	DYRK4
ENSG00000010244.19	134.523	-0.0131993	0.189684	-0.0695858	0.944523	0.999872	ENSG00000010244	ZNF207
ENSG00000010256.11	320.149	0.0391773	0.119767	0.327113	0.743583	0.999872	ENSG00000010256	UQCRC1
ENSG00000010270.14	0.138346	-0.16064	3.08959	-0.0519938	0.958534	0.999872	ENSG00000010270	STARD3NL
ENSG00000010278.15	0.456058	-0.387726	3.10294	-0.124954	0.90056	0.999872	ENSG00000010278	CD9
ENSG00000010282.15	0.0661481	0.260191	3.11135	0.0836263	0.933354	0.999872	ENSG00000010282	HHATL
ENSG00000010292.13	0.0371729	0.287751	3.11438	0.0923943	0.926385	0.999872	ENSG00000010292	NCAPD2
ENSG00000010295.20	71.6027	-0.0378351	0.223886	-0.168993	0.865802	0.999872	ENSG00000010295	IFFO1
ENSG00000010310.9	2.89466	0.920148	1.96551	0.468148	0.639679	0.999872	ENSG00000010310	GIPR
ENSG00000010318.21	11.5908	-0.319606	0.51844	-0.616475	0.537581	0.999872	ENSG00000010318	PHF7
ENSG00000010322.16	28.1733	-0.0300479	0.329754	-0.0911222	0.927395	0.999872	ENSG00000010322	NISCH
ENSG00000010327.10	192.441	-0.0899676	0.191685	-0.469351	0.638819	0.999872	ENSG00000010327	STAB1
ENSG00000010361.14	38.9677	-0.220989	0.355653	-0.621361	0.534362	0.999872	ENSG00000010361	FUZ
ENSG00000010379.16	10.7195	-1.06814	0.747357	-1.42922	0.152942	0.999872	ENSG00000010379	SLC6A13
ENSG00000010404.18	93.0413	-0.210462	0.231404	-0.9095	0.363086	0.999872	ENSG00000010404	IDS
ENSG00000010438.17	4.76695	1.91689	1.24519	1.53943	0.123699	0.999872	ENSG00000010438	PRSS3
ENSG00000010539.12	34.2025	-0.00360829	0.354767	-0.0101709	0.991885	0.999872	ENSG00000010539	ZNF200
ENSG00000010610.10	0.481121	-0.332672	3.07504	-0.108185	0.913849	0.999872	ENSG00000010610	CD4
ENSG00000010626.15	13.8886	-0.823616	0.808868	-1.01823	0.308567	0.999872	ENSG00000010626	LRRC23
ENSG00000010671.16	21.7848	0.933485	0.397671	2.34738	0.0189059	0.999872	ENSG00000010671	BTK
ENSG00000010704.18	36.9356	-0.143427	0.392057	-0.365832	0.714491	0.999872	ENSG00000010704	HFE
ENSG00000010803.16	134.873	-0.188865	0.208744	-0.904768	0.365588	0.999872	ENSG00000010803	SCMH1
ENSG00000010810.17	415.895	0.0026379	0.171155	0.0154123	0.987703	0.999872	ENSG00000010810	FYN
ENSG00000010818.10	8.0348	-1.5906	1.36172	-1.16809	0.242772	0.999872	ENSG00000010818	HIVEP2
ENSG00000010932.17	1.95152	-0.992113	1.42097	-0.698194	0.485056	0.999872	ENSG00000010932	FMO1
ENSG00000011007.12	182.597	0.235833	0.142072	1.65996	0.0969233	0.999872	ENSG00000011007	ELOA
ENSG00000011021.23	16.5833	-0.0176395	0.473832	-0.0372272	0.970304	0.999872	ENSG00000011021	CLCN6
ENSG00000011028.14	120.699	-0.0626217	0.221686	-0.282479	0.777576	0.999872	ENSG00000011028	MRC2
ENSG00000011105.14	293.395	-0.0512955	0.167757	-0.305773	0.759778	0.999872	ENSG00000011105	TSPAN9
ENSG00000011114.15	241.94	-0.0541641	0.153757	-0.35227	0.724636	0.999872	ENSG00000011114	BTBD7
ENSG00000011132.12	126.185	0.0529924	0.163925	0.323272	0.746489	0.999872	ENSG00000011132	APBA3
ENSG00000011143.19	0.641927	-1.02467	3.05947	-0.334917	0.737688	0.999872	ENSG00000011143	MKS1
ENSG00000011198.10	130.75	0.0337504	0.271184	0.124455	0.900955	0.999872	ENSG00000011198	ABHD5
ENSG00000011201.12	0.674014	-0.254505	3.04768	-0.0835077	0.933448	0.999872	ENSG00000011201	ANOS1
ENSG00000011243.18	27.3726	0.227278	0.376295	0.603989	0.545851	0.999872	ENSG00000011243	AKAP8L
ENSG00000011258.16	5.28603	-0.31602	0.825015	-0.383048	0.701684	0.999872	ENSG00000011258	MBTD1
ENSG00000011260.14	46.5842	-0.00338921	0.300188	-0.0112903	0.990992	0.999872	ENSG00000011260	UTP18
ENSG00000011275.19	178.394	0.138274	0.134047	1.03153	0.302291	0.999872	ENSG00000011275	RNF216
ENSG00000011295.16	37.5262	-0.0248709	0.327015	-0.0760544	0.939376	0.999872	ENSG00000011295	TTC19
ENSG00000011304.22	1348.86	-0.0173361	0.0787375	-0.220176	0.825734	0.999872	ENSG00000011304	PTBP1
ENSG00000011332.19	4.38923	-0.19311	1.1812	-0.163487	0.870135	0.999872	ENSG00000011332	DPF1
ENSG00000011347.10	67.9499	0.0702787	0.284503	0.247023	0.804891	0.999872	ENSG00000011347	SYT7
ENSG00000011405.13	302.291	0.307731	0.182379	1.68732	0.0915427	0.999872	ENSG00000011405	PIK3C2A
ENSG00000011422.12	760.705	-0.0235345	0.0994427	-0.236664	0.812917	0.999872	ENSG00000011422	PLAUR
ENSG00000011426.11	6.05633	-0.884492	0.753717	-1.17351	0.240593	0.999872	ENSG00000011426	ANLN
ENSG00000011451.21	411.117	0.22087	0.116176	1.90117	0.0572793	0.999872	ENSG00000011451	WIZ
ENSG00000011454.18	6.43077	0.417721	0.763598	0.547044	0.584349	0.999872	ENSG00000011454	RABGAP1
ENSG00000011465.18	2003.38	-0.0361753	0.148207	-0.244086	0.807164	0.999872	ENSG00000011465	DCN
ENSG00000011478.13	27.2478	-0.137442	0.385982	-0.356085	0.721777	0.999872	ENSG00000011478	QPCTL
ENSG00000011485.15	21.307	-0.00541157	0.428121	-0.0126403	0.989915	0.999872	ENSG00000011485	PPP5C
ENSG00000011523.14	87.1747	0.239894	0.204456	1.17333	0.240663	0.999872	ENSG00000011523	CEP68
ENSG00000011566.15	0.597715	-1.0369	3.05078	-0.339882	0.733946	0.999872	ENSG00000011566	MAP4K3
ENSG00000011590.14	0.453376	0.697068	3.07619	0.226601	0.820734	0.999872	ENSG00000011590	ZBTB32
ENSG00000011600.12	863.745	0.161661	0.0995481	1.62395	0.104387	0.999872	ENSG00000011600	TYROBP
ENSG00000011638.11	0.612694	0.309865	3.08108	0.10057	0.919892	0.999872	ENSG00000011638	LDAF1
ENSG00000012048.23	21.7817	0.307668	0.489797	0.628155	0.529902	0.999872	ENSG00000012048	BRCA1
ENSG00000012061.16	180.708	-0.20998	0.140243	-1.49726	0.134326	0.999872	ENSG00000012061	ERCC1
ENSG00000012124.17	10.6455	0.350141	0.763966	0.458321	0.646722	0.999872	ENSG00000012124	CD22
ENSG00000012171.20	74.8577	-0.117087	0.254523	-0.460027	0.645497	0.999872	ENSG00000012171	SEMA3B
ENSG00000012174.12	5.22268	-0.231812	0.784437	-0.295514	0.767601	0.999872	ENSG00000012174	MBTPS2
ENSG00000012211.13	6.4541	0.404245	0.731119	0.552913	0.580323	0.999872	ENSG00000012211	PRICKLE3
ENSG00000012232.9	138.293	-0.0687539	0.233452	-0.29451	0.768368	0.999872	ENSG00000012232	EXTL3
ENSG00000012504.15	116.367	0.246053	0.330572	0.744324	0.45668	0.999872	ENSG00000012504	NR1H4
ENSG00000012660.14	568.842	0.0144864	0.115544	0.125376	0.900226	0.999872	ENSG00000012660	ELOVL5
ENSG00000012779.11	78.0788	0.388458	0.196395	1.97795	0.0479344	0.999872	ENSG00000012779	ALOX5
ENSG00000012817.16	37.0121	0.270738	0.513137	0.527614	0.597768	0.999872	ENSG00000012817	KDM5D
ENSG00000012822.16	78.8102	-0.318701	0.327974	-0.971727	0.331186	0.999872	ENSG00000012822	CALCOCO1
ENSG00000012963.15	1.03345	-0.174228	3.07482	-0.0566628	0.954814	0.999872	ENSG00000012963	UBR7
ENSG00000012983.11	136.912	-0.102794	0.160735	-0.639527	0.52248	0.999872	ENSG00000012983	MAP4K5
ENSG00000013275.8	1064.57	-0.118298	0.0887591	-1.3328	0.182598	0.999872	ENSG00000013275	PSMC4
ENSG00000013288.9	6.60452	0.209429	0.85461	0.245058	0.806412	0.999872	ENSG00000013288	MAN2B2
ENSG00000013293.6	0.132296	0.466219	3.10577	0.150114	0.880675	0.999872	ENSG00000013293	SLC7A14
ENSG00000013306.16	562.797	0.0890085	0.0984227	0.90435	0.36581	0.999872	ENSG00000013306	SLC25A39
ENSG00000013364.19	23.2839	-0.422462	0.417479	-1.01194	0.311569	0.999872	ENSG00000013364	MVP
ENSG00000013374.16	188.486	0.0811064	0.13738	0.590379	0.554937	0.999872	ENSG00000013374	NUB1
ENSG00000013375.16	6.9308	-2.86695	3.00783	-0.953162	0.340508	0.999872	ENSG00000013375	PGM3
ENSG00000013441.16	327.705	-0.0484727	0.269184	-0.180072	0.857096	0.999872	ENSG00000013441	CLK1
ENSG00000013503.10	1.3275	0.317196	3.07738	0.103074	0.917905	0.999872	ENSG00000013503	POLR3B
ENSG00000013561.18	204.864	0.159193	0.195591	0.813906	0.415699	0.999872	ENSG00000013561	RNF14
ENSG00000013563.14	3.3606	-0.124542	0.960513	-0.129662	0.896834	0.999872	ENSG00000013563	DNASE1L1
ENSG00000013573.17	45.4568	0.051285	0.279405	0.18355	0.854366	0.999872	ENSG00000013573	DDX11
ENSG00000013583.10	2.05944	-0.609694	1.57531	-0.38703	0.698734	0.999872	ENSG00000013583	HEBP1
ENSG00000013588.9	0.835891	-1.33607	2.39711	-0.55737	0.577275	0.999872	ENSG00000013588	GPRC5A
ENSG00000013619.14	26.4303	0.34427	0.410547	0.838565	0.401714	0.999872	ENSG00000013619	MAMLD1
ENSG00000013725.14	42.3647	0.270902	0.352393	0.768749	0.442042	0.999872	ENSG00000013725	CD6
ENSG00000013810.20	2.09429	-1.25121	1.41294	-0.885537	0.375867	0.999872	ENSG00000013810	TACC3
ENSG00000014123.10	2.34807	-0.0103693	1.3674	-0.00758322	0.99395	0.999872	ENSG00000014123	UFL1
ENSG00000014138.9	5.2404	-1.56953	0.872756	-1.79836	0.0721207	0.999872	ENSG00000014138	POLA2
ENSG00000014164.7	2.11524	1.02864	1.30946	0.785545	0.432134	0.999872	ENSG00000014164	ZC3H3
ENSG00000014216.16	1200.19	-0.0167787	0.12896	-0.130108	0.896481	0.999872	ENSG00000014216	CAPN1
ENSG00000014257.16	0.200006	0.426189	3.08247	0.138262	0.890033	0.999872	ENSG00000014257	ACP3
ENSG00000014641.21	329.754	-0.240512	0.154582	-1.55589	0.119735	0.999872	ENSG00000014641	MDH1
ENSG00000014824.14	15.1806	0.223956	0.485847	0.460959	0.644828	0.999872	ENSG00000014824	SLC30A9
ENSG00000014914.21	49.3242	0.0824783	0.275033	0.299885	0.764265	0.999872	ENSG00000014914	MTMR11
ENSG00000014919.13	116.72	0.0454764	0.161745	0.281161	0.778587	0.999872	ENSG00000014919	COX15
ENSG00000015133.19	35.0539	0.316956	0.40054	0.791322	0.428756	0.999872	ENSG00000015133	CCDC88C
ENSG00000015153.15	75.3479	0.332482	0.380988	0.872684	0.382835	0.999872	ENSG00000015153	YAF2
ENSG00000015171.20	280.586	-0.110489	0.12769	-0.86529	0.386879	0.999872	ENSG00000015171	ZMYND11
ENSG00000015285.11	0.0457255	-0.577147	3.10685	-0.185766	0.852628	0.999872	ENSG00000015285	WAS
ENSG00000015413.9	2.06019	-0.342785	1.19797	-0.28614	0.774771	0.999872	ENSG00000015413	DPEP1
ENSG00000015475.19	239.128	-0.024364	0.160762	-0.151553	0.87954	0.999872	ENSG00000015475	BID
ENSG00000015479.20	60.4517	-1.03026	0.555376	-1.85506	0.063587	0.999872	ENSG00000015479	MATR3
ENSG00000015520.15	147.057	-0.0376758	0.195351	-0.192862	0.847067	0.999872	ENSG00000015520	NPC1L1
ENSG00000015532.10	75.1641	-0.10115	0.222546	-0.45451	0.649462	0.999872	ENSG00000015532	XYLT2
ENSG00000015568.13	104.818	-1.61705	0.582855	-2.77435	0.00553115	0.999872	ENSG00000015568	RGPD5
ENSG00000015592.16	0.264982	-0.0240409	3.07543	-0.00781708	0.993763	0.999872	ENSG00000015592	STMN4
ENSG00000015676.18	23.1659	0.0254493	0.483864	0.052596	0.958054	0.999872	ENSG00000015676	NUDCD3
ENSG00000016402.13	8.36714	-0.682939	0.789591	-0.864928	0.387078	0.999872	ENSG00000016402	IL20RA
ENSG00000016864.18	162.262	0.273818	0.202003	1.35551	0.175254	0.999872	ENSG00000016864	GLT8D1
ENSG00000017260.20	314.884	0.0286862	0.149743	0.19157	0.848079	0.999872	ENSG00000017260	ATP2C1
ENSG00000017427.17	31.4936	-1.68865	0.646885	-2.61044	0.00904259	0.999872	ENSG00000017427	IGF1
ENSG00000017483.15	5.72491	-1.82207	1.13222	-1.60929	0.107553	0.999872	ENSG00000017483	SLC38A5
ENSG00000017797.13	169.64	-0.0492637	0.147612	-0.333737	0.738578	0.999872	ENSG00000017797	RALBP1
ENSG00000018189.13	207.397	-0.000979672	0.189612	-0.00516671	0.995878	0.999872	ENSG00000018189	RUFY3
ENSG00000018236.15	0.230502	-0.400167	3.08113	-0.129876	0.896664	0.999872	ENSG00000018236	CNTN1
ENSG00000018280.17	31.3367	0.090664	0.343025	0.264307	0.791543	0.999872	ENSG00000018280	SLC11A1
ENSG00000018408.15	694.812	0.0292607	0.0904605	0.323464	0.746344	0.999872	ENSG00000018408	WWTR1
ENSG00000018510.17	6.75783	-1.90156	1.64418	-1.15654	0.247461	0.999872	ENSG00000018510	AGPS
ENSG00000018610.15	80.1044	-0.182086	0.226777	-0.802928	0.422016	0.999872	ENSG00000018610	STEEP1
ENSG00000018625.15	0.36355	-1.71259	3.0808	-0.555893	0.578284	0.999872	ENSG00000018625	ATP1A2
ENSG00000018699.13	2.43899	-0.701681	1.1332	-0.619206	0.535781	0.999872	ENSG00000018699	TTC27
ENSG00000018869.17	14.6861	-0.20142	0.50388	-0.399738	0.689349	0.999872	ENSG00000018869	ZNF582
ENSG00000019102.12	16.2698	0.0248479	0.481459	0.0516097	0.95884	0.999872	ENSG00000019102	VSIG2
ENSG00000019144.19	74.4588	0.102174	0.2736	0.373445	0.708817	0.999872	ENSG00000019144	PHLDB1
ENSG00000019169.10	162.528	-0.185833	0.196663	-0.944929	0.344695	0.999872	ENSG00000019169	MARCO
ENSG00000019186.10	0.39705	-1.88119	3.08053	-0.610671	0.541417	0.999872	ENSG00000019186	CYP24A1
ENSG00000019485.13	25.9647	0.0479506	0.381171	0.125798	0.899892	0.999872	ENSG00000019485	PRDM11
ENSG00000019549.13	0.204231	0.284341	3.09414	0.0918968	0.92678	0.999872	ENSG00000019549	SNAI2
ENSG00000019582.15	2102.08	-0.0189836	0.0927528	-0.204669	0.837831	0.999872	ENSG00000019582	CD74
ENSG00000019991.18	135.139	0.0184571	0.22186	0.0831925	0.933699	0.999872	ENSG00000019991	HGF
ENSG00000019995.6	125.526	-0.337436	0.279044	-1.20926	0.226565	0.999872	ENSG00000019995	ZRANB1
ENSG00000020129.16	77.5064	0.305332	0.247762	1.23236	0.217815	0.999872	ENSG00000020129	NCDN
ENSG00000020181.18	87.4861	0.0514956	0.219493	0.234612	0.81451	0.999872	ENSG00000020181	ADGRA2
ENSG00000020256.20	33.3726	-0.0895698	0.29778	-0.300792	0.763573	0.999872	ENSG00000020256	ZFP64
ENSG00000020426.11	6.68135	-1.91706	1.19448	-1.60493	0.10851	0.999872	ENSG00000020426	MNAT1
ENSG00000020577.14	97.0775	0.416082	0.249263	1.66925	0.0950675	0.999872	ENSG00000020577	SAMD4A
ENSG00000020633.19	303.379	-0.0235003	0.11503	-0.204297	0.838121	0.999872	ENSG00000020633	RUNX3
ENSG00000020922.13	0.402966	-2.03262	3.0825	-0.659405	0.509636	0.999872	ENSG00000020922	MRE11
ENSG00000021300.14	15.194	-0.171635	0.564892	-0.303837	0.761252	0.999872	ENSG00000021300	PLEKHB1
ENSG00000021355.13	0.638552	-0.565346	3.0598	-0.184766	0.853413	0.999872	ENSG00000021355	SERPINB1
ENSG00000021461.17	6.31703	0.799096	1.15848	0.689776	0.490335	0.999872	ENSG00000021461	CYP3A43
ENSG00000021488.13	35.3414	-0.0348498	0.320663	-0.10868	0.913456	0.999872	ENSG00000021488	SLC7A9
ENSG00000021574.13	65.2724	-0.0870223	0.238361	-0.365086	0.715047	0.999872	ENSG00000021574	SPAST
ENSG00000021645.20	19.5352	0.413965	0.383214	1.08024	0.280033	0.999872	ENSG00000021645	NRXN3
ENSG00000021762.20	189.652	-0.0668276	0.140622	-0.47523	0.634623	0.999872	ENSG00000021762	OSBPL5
ENSG00000021776.11	3.15153	-0.319221	1.51212	-0.211108	0.832803	0.999872	ENSG00000021776	AQR
ENSG00000021826.17	97.637	-4.62666	1.52316	-3.03754	0.00238514	0.999872	ENSG00000021826	CPS1
ENSG00000021852.13	6.1245	1.76615	1.19623	1.47643	0.139827	0.999872	ENSG00000021852	C8B
ENSG00000022267.19	86.1416	0.607008	0.55656	1.09064	0.27543	0.999872	ENSG00000022267	FHL1
ENSG00000022277.13	2.3249	1.6289	1.47136	1.10707	0.268262	0.999872	ENSG00000022277	RTF2
ENSG00000022556.16	27.3605	-0.421296	0.456616	-0.922649	0.35619	0.999872	ENSG00000022556	NLRP2
ENSG00000022567.10	130.043	-0.123307	0.223996	-0.550488	0.581985	0.999872	ENSG00000022567	SLC45A4
ENSG00000022840.16	390.211	0.0522976	0.143647	0.364071	0.715805	0.999872	ENSG00000022840	RNF10
ENSG00000022976.15	35.873	0.306369	0.418209	0.732573	0.463819	0.999872	ENSG00000022976	ZNF839
ENSG00000023041.11	139.348	-0.0055442	0.148252	-0.0373972	0.970168	0.999872	ENSG00000023041	ZDHHC6
ENSG00000023171.18	35.41	-0.113235	0.365139	-0.310115	0.756474	0.999872	ENSG00000023171	GRAMD1B
ENSG00000023191.17	1944.25	-0.0607956	0.131474	-0.462416	0.643783	0.999872	ENSG00000023191	RNH1
ENSG00000023228.14	8.96858	0.685556	2.97528	0.230418	0.817767	0.999872	ENSG00000023228	NDUFS1
ENSG00000023287.13	9.72517	-1.73772	2.99571	-0.580069	0.561868	0.999872	ENSG00000023287	RB1CC1
ENSG00000023330.15	141.416	-0.102415	0.180946	-0.565994	0.571398	0.999872	ENSG00000023330	ALAS1
ENSG00000023445.16	269.507	-0.0141619	0.127183	-0.11135	0.911339	0.999872	ENSG00000023445	BIRC3
ENSG00000023572.10	281.766	-0.0835705	0.122321	-0.683204	0.494478	0.999872	ENSG00000023572	GLRX2
ENSG00000023697.13	0.353435	0.239935	3.08111	0.0778727	0.937929	0.999872	ENSG00000023697	DERA
ENSG00000023734.11	568.66	-0.0021553	0.12244	-0.0176029	0.985956	0.999872	ENSG00000023734	STRAP
ENSG00000023839.12	39.9469	-0.680583	0.348637	-1.95212	0.0509236	0.999872	ENSG00000023839	ABCC2
ENSG00000023902.14	1.58787	-0.455613	1.46062	-0.311931	0.755093	0.999872	ENSG00000023902	PLEKHO1
ENSG00000023909.10	8.84199	-0.207293	3.04549	-0.0680654	0.945734	0.999872	ENSG00000023909	GCLM
ENSG00000024048.11	0.356061	1.41823	3.08248	0.460093	0.645449	0.999872	ENSG00000024048	UBR2
ENSG00000024422.12	0.128387	-0.7858	3.09295	-0.254062	0.799448	0.999872	ENSG00000024422	EHD2
ENSG00000024526.17	2.04029	-1.15564	1.62061	-0.713092	0.475789	0.999872	ENSG00000024526	DEPDC1
ENSG00000025039.15	27.6543	3.51772	1.95821	1.7964	0.0724312	0.999872	ENSG00000025039	RRAGD
ENSG00000025156.13	73.8788	0.0572931	0.21692	0.26412	0.791687	0.999872	ENSG00000025156	HSF2
ENSG00000025293.17	5.87401	0.833642	0.760626	1.09599	0.273081	0.999872	ENSG00000025293	PHF20
ENSG00000025423.11	1357.23	-0.130245	0.174906	-0.744657	0.456479	0.999872	ENSG00000025423	HSD17B6
ENSG00000025434.19	49.3325	0.556652	0.393896	1.4132	0.157598	0.999872	ENSG00000025434	NR1H3
ENSG00000025708.14	135.497	0.0180871	0.197862	0.0914128	0.927165	0.999872	ENSG00000025708	TYMP
ENSG00000025770.19	77.5958	0.0889453	0.251499	0.35366	0.723594	0.999872	ENSG00000025770	NCAPH2
ENSG00000025796.14	14.606	1.082	0.663663	1.63034	0.103029	0.999872	ENSG00000025796	SEC63
ENSG00000025800.14	0.232888	-1.32809	3.08048	-0.43113	0.666374	0.999872	ENSG00000025800	KPNA6
ENSG00000026025.16	5695.83	-0.0011027	0.116808	-0.00944033	0.992468	0.999872	ENSG00000026025	VIM
ENSG00000026036.22	29.5735	-0.197571	0.378736	-0.52166	0.601907	0.999872	ENSG00000026036	RTEL1-TNFRSF6B
ENSG00000026103.22	0.943067	-0.129056	2.024	-0.0637626	0.949159	0.999872	ENSG00000026103	FAS
ENSG00000026297.16	14.8297	0.265391	0.462398	0.573945	0.566005	0.999872	ENSG00000026297	RNASET2
ENSG00000026508.20	303.077	-0.0435423	0.134631	-0.323419	0.746378	0.999872	ENSG00000026508	CD44
ENSG00000026559.14	3.43788	-0.202085	1.0107	-0.199946	0.841523	0.999872	ENSG00000026559	KCNG1
ENSG00000026652.15	33.3912	0.389201	0.355046	1.0962	0.272992	0.999872	ENSG00000026652	AGPAT4
ENSG00000026751.17	23.4458	0.0589182	0.427939	0.137679	0.890494	0.999872	ENSG00000026751	SLAMF7
ENSG00000026950.17	3.1094	0.568931	1.0405	0.546788	0.584524	0.999872	ENSG00000026950	BTN3A1
ENSG00000027001.10	63.4171	-0.0776349	0.279717	-0.277548	0.781359	0.999872	ENSG00000027001	MIPEP
ENSG00000027075.15	75.0496	0.38578	0.308993	1.24851	0.211844	0.999872	ENSG00000027075	PRKCH
ENSG00000027697.15	1.6801	0.757628	3.04548	0.248771	0.803538	0.999872	ENSG00000027697	IFNGR1
ENSG00000027847.14	5.4733	-1.27056	1.08687	-1.16901	0.242399	0.999872	ENSG00000027847	B4GALT7
ENSG00000027869.12	38.158	0.252871	0.324254	0.779855	0.435476	0.999872	ENSG00000027869	SH2D2A
ENSG00000028116.18	71.2779	-0.188548	0.242943	-0.776099	0.43769	0.999872	ENSG00000028116	VRK2
ENSG00000028137.19	372.191	-0.033471	0.133231	-0.251225	0.80164	0.999872	ENSG00000028137	TNFRSF1B
ENSG00000028203.18	41.72	-0.0387438	0.271659	-0.142619	0.886591	0.999872	ENSG00000028203	VEZT
ENSG00000028277.21	77.8739	-0.515716	0.265339	-1.94361	0.0519421	0.999872	ENSG00000028277	POU2F2
ENSG00000028310.18	295.67	-0.289354	0.130394	-2.21907	0.026482	0.999872	ENSG00000028310	BRD9
ENSG00000028528.15	299.86	0.0731645	0.134435	0.544235	0.58628	0.999872	ENSG00000028528	SNX1
ENSG00000028839.10	24.25	0.724066	0.945382	0.765898	0.443737	0.999872	ENSG00000028839	TBPL1
ENSG00000029153.14	155.995	-0.0846467	0.175111	-0.483389	0.62882	0.999872	ENSG00000029153	BMAL2
ENSG00000029363.17	370.369	0.0224885	0.173507	0.129611	0.896874	0.999872	ENSG00000029363	BCLAF1
ENSG00000029364.12	196.658	-0.24199	0.157804	-1.53348	0.125157	0.999872	ENSG00000029364	SLC39A9
ENSG00000029534.21	8.79592	-0.412365	0.693392	-0.594708	0.552039	0.999872	ENSG00000029534	ANK1
ENSG00000029639.11	2.50274	1.29198	1.54486	0.836307	0.402982	0.999872	ENSG00000029639	TFB1M
ENSG00000029725.17	12.8472	-0.633249	0.477263	-1.32683	0.184564	0.999872	ENSG00000029725	RABEP1
ENSG00000030066.13	90.2786	-0.017177	0.226567	-0.0758143	0.939567	0.999872	ENSG00000030066	NUP160
ENSG00000030110.13	124.171	0.172831	0.180551	0.957243	0.338445	0.999872	ENSG00000030110	BAK1
ENSG00000030304.14	0.974287	-0.211236	3.0617	-0.0689931	0.944995	0.999872	ENSG00000030304	MUSK
ENSG00000030419.16	41.0265	-0.179739	0.305335	-0.588663	0.556087	0.999872	ENSG00000030419	IKZF2
ENSG00000030582.18	1339.11	-0.0123336	0.10102	-0.12209	0.902828	0.999872	ENSG00000030582	GRN
ENSG00000031003.10	58.8128	-0.0532073	0.326893	-0.162767	0.870702	0.999872	ENSG00000031003	FAM13B
ENSG00000031698.13	381.666	0.121797	0.118753	1.02563	0.305065	0.999872	ENSG00000031698	SARS1
ENSG00000031823.14	233.825	-0.0676566	0.165516	-0.408761	0.682715	0.999872	ENSG00000031823	RANBP3
ENSG00000032219.19	164.731	-0.161915	0.194318	-0.833245	0.404707	0.999872	ENSG00000032219	ARID4A
ENSG00000032389.13	0.168264	0.746107	3.1078	0.240076	0.810272	0.999872	ENSG00000032389	EIPR1
ENSG00000032444.17	80.4911	-0.30594	0.210674	-1.4522	0.146447	0.999872	ENSG00000032444	PNPLA6
ENSG00000032742.18	57.2873	-0.0541643	0.243363	-0.222566	0.823873	0.999872	ENSG00000032742	IFT88
ENSG00000033011.13	84.9502	-0.0294653	0.20161	-0.14615	0.883803	0.999872	ENSG00000033011	ALG1
ENSG00000033030.15	98.4916	-0.314836	0.235186	-1.33867	0.180679	0.999872	ENSG00000033030	ZCCHC8
ENSG00000033050.9	0.0617059	-0.597806	3.11098	-0.19216	0.847617	0.999872	ENSG00000033050	ABCF2
ENSG00000033100.16	371.846	0.0955764	0.100892	0.94731	0.343481	0.999872	ENSG00000033100	CHPF2
ENSG00000033122.21	5.89893	1.10608	0.805735	1.37276	0.169828	0.999872	ENSG00000033122	LRRC7
ENSG00000033170.17	35.935	0.612024	0.592806	1.03242	0.301876	0.999872	ENSG00000033170	FUT8
ENSG00000033178.13	42.6489	-0.745715	0.326153	-2.28639	0.0222312	0.999872	ENSG00000033178	UBA6
ENSG00000033327.13	86.9598	0.0100538	0.186607	0.0538771	0.957033	0.999872	ENSG00000033327	GAB2
ENSG00000033627.17	19.5693	-0.131362	0.522756	-0.251288	0.801591	0.999872	ENSG00000033627	ATP6V0A1
ENSG00000033800.14	68.7093	-0.0677528	0.238601	-0.283959	0.776442	0.999872	ENSG00000033800	PIAS1
ENSG00000033867.16	542.025	0.170467	0.106742	1.59701	0.110265	0.999872	ENSG00000033867	SLC4A7
ENSG00000034053.14	16.4372	0.06628	0.441165	0.150238	0.880577	0.999872	ENSG00000034053	APBA2
ENSG00000034152.19	0.410189	0.13156	3.08694	0.0426184	0.966006	0.999872	ENSG00000034152	MAP2K3
ENSG00000034239.11	0.662657	-2.02147	3.06404	-0.65974	0.509421	0.999872	ENSG00000034239	CLXN
ENSG00000034533.12	12.6463	2.25298	1.02083	2.20701	0.0273132	0.999872	ENSG00000034533	ASTE1
ENSG00000034677.13	207.388	-0.524799	0.334317	-1.56977	0.11647	0.999872	ENSG00000034677	RNF19A
ENSG00000034693.15	3.12815	-0.865331	1.03983	-0.832184	0.405305	0.999872	ENSG00000034693	PEX3
ENSG00000034713.8	340.146	-0.130554	0.109558	-1.19165	0.233399	0.999872	ENSG00000034713	GABARAPL2
ENSG00000035115.22	90.922	-0.436817	0.241583	-1.80814	0.0705843	0.999872	ENSG00000035115	SH3YL1
ENSG00000035141.8	183.287	0.163122	0.138253	1.17988	0.238048	0.999872	ENSG00000035141	FAM136A
ENSG00000035403.18	613.757	-0.0406697	0.11177	-0.363868	0.715957	0.999872	ENSG00000035403	VCL
ENSG00000035664.11	39.6438	-0.166232	0.309572	-0.536975	0.591285	0.999872	ENSG00000035664	DAPK2
ENSG00000035681.9	1.45128	-1.47098	1.83032	-0.803674	0.421585	0.999872	ENSG00000035681	NSMAF
ENSG00000035687.10	0.0371729	0.287751	3.11438	0.0923943	0.926385	0.999872	ENSG00000035687	ADSS2
ENSG00000035720.8	0.17525	-1.05409	3.10497	-0.339484	0.734245	0.999872	ENSG00000035720	STAP1
ENSG00000035862.12	648.214	0.0193242	0.120288	0.16065	0.872369	0.999872	ENSG00000035862	TIMP2
ENSG00000035928.16	127.013	-0.350301	0.386878	-0.905458	0.365223	0.999872	ENSG00000035928	RFC1
ENSG00000036054.13	156.139	0.11693	0.159715	0.732118	0.464096	0.999872	ENSG00000036054	TBC1D23
ENSG00000036257.13	262.133	-0.364938	0.175465	-2.07983	0.0375413	0.999872	ENSG00000036257	CUL3
ENSG00000036448.10	21.7536	-0.046169	0.378381	-0.122017	0.902885	0.999872	ENSG00000036448	MYOM2
ENSG00000036530.9	3.32452	-0.932335	1.004	-0.928618	0.353087	0.999872	ENSG00000036530	CYP46A1
ENSG00000036549.13	79.9388	-0.169057	0.223969	-0.754822	0.450356	0.999872	ENSG00000036549	ZZZ3
ENSG00000036672.16	21.9191	0.0559262	0.445663	0.12549	0.900136	0.999872	ENSG00000036672	USP2
ENSG00000036828.17	0.0932958	0.236436	3.10669	0.0761054	0.939335	0.999872	ENSG00000036828	CASR
ENSG00000037042.9	0.0371729	0.287751	3.11438	0.0923943	0.926385	0.999872	ENSG00000037042	TUBG2
ENSG00000037241.7	171.629	-0.162675	0.193591	-0.840303	0.400739	0.999872	ENSG00000037241	RPL26L1
ENSG00000037280.16	1.19409	0.0387345	2.2084	0.0175396	0.986006	0.999872	ENSG00000037280	FLT4
ENSG00000037474.15	1.08432	-0.472892	2.01953	-0.23416	0.814861	0.999872	ENSG00000037474	NSUN2
ENSG00000037637.11	15.3195	-0.0340713	0.474174	-0.0718541	0.942718	0.999872	ENSG00000037637	FBXO42
ENSG00000037749.12	23.2286	0.353732	0.488252	0.724487	0.468767	0.999872	ENSG00000037749	MFAP3
ENSG00000037757.14	138.682	-0.120374	0.210724	-0.571243	0.567835	0.999872	ENSG00000037757	MRI1
ENSG00000037897.17	10.1419	-0.304072	1.28479	-0.23667	0.812913	0.999872	ENSG00000037897	METTL1
ENSG00000038002.9	0.170751	0.0557455	3.10317	0.017964	0.985668	0.999872	ENSG00000038002	AGA
ENSG00000038219.13	25.9266	0.529149	0.403483	1.31145	0.189705	0.999872	ENSG00000038219	BOD1L1
ENSG00000038274.17	344.393	0.0978569	0.208507	0.469323	0.638839	0.999872	ENSG00000038274	MAT2B
ENSG00000038295.8	0.179516	-1.23482	3.0949	-0.398984	0.689905	0.999872	ENSG00000038295	TLL1
ENSG00000038358.15	0.445353	-0.218721	3.05889	-0.0715033	0.942997	0.999872	ENSG00000038358	EDC4
ENSG00000038382.20	242.793	0.0949424	0.189897	0.499969	0.617097	0.999872	ENSG00000038382	TRIO
ENSG00000038427.16	1104.33	-0.141638	0.151536	-0.93468	0.349953	0.999872	ENSG00000038427	VCAN
ENSG00000038532.16	33.4501	0.386638	0.58164	0.664738	0.506218	0.999872	ENSG00000038532	CLEC16A
ENSG00000038945.15	207.702	0.0746008	0.196007	0.380603	0.703498	0.999872	ENSG00000038945	MSR1
ENSG00000039068.19	2.44994	1.36147	1.94252	0.700876	0.483381	0.999872	ENSG00000039068	CDH1
ENSG00000039123.16	71.6843	0.0827958	0.331978	0.249401	0.80305	0.999872	ENSG00000039123	MTREX
ENSG00000039139.9	17.0751	-0.152056	0.526527	-0.28879	0.772742	0.999872	ENSG00000039139	DNAH5
ENSG00000039319.17	131.991	-0.141579	0.228508	-0.619579	0.535535	0.999872	ENSG00000039319	ZFYVE16
ENSG00000039523.20	618.009	-0.0504372	0.115175	-0.437918	0.661445	0.999872	ENSG00000039523	RIPOR1
ENSG00000039537.14	1.10761	-0.676953	2.57115	-0.263288	0.792328	0.999872	ENSG00000039537	C6
ENSG00000039560.14	10.4813	-0.295786	0.645937	-0.457917	0.647012	0.999872	ENSG00000039560	RAI14
ENSG00000039600.11	0.0668953	-0.63031	3.11459	-0.202374	0.839625	0.999872	ENSG00000039600	SOX30
ENSG00000039650.12	160.19	-0.224156	0.347542	-0.644976	0.518943	0.999872	ENSG00000039650	PNKP
ENSG00000040199.18	21.048	-0.0243278	0.377632	-0.0644219	0.948634	0.999872	ENSG00000040199	PHLPP2
ENSG00000040275.17	82.7329	0.00635223	0.240512	0.0264113	0.978929	0.999872	ENSG00000040275	SPDL1
ENSG00000040341.18	240.486	0.0210597	0.164258	0.128211	0.897982	0.999872	ENSG00000040341	STAU2
ENSG00000040487.13	47.988	0.0570751	0.300701	0.189807	0.849461	0.999872	ENSG00000040487	SLC66A1
ENSG00000040531.16	0.23164	-0.188814	3.10105	-0.0608872	0.951449	0.999872	ENSG00000040531	CTNS
ENSG00000040608.14	66.6582	-0.110228	0.240676	-0.457993	0.646958	0.999872	ENSG00000040608	RTN4R
ENSG00000040633.13	135.851	-0.0477246	0.177213	-0.269307	0.787693	0.999872	ENSG00000040633	PHF23
ENSG00000040933.16	61.9841	-0.078219	0.259984	-0.300861	0.763521	0.999872	ENSG00000040933	INPP4A
ENSG00000041357.16	136.635	0.0731589	0.251746	0.290607	0.771352	0.999872	ENSG00000041357	PSMA4
ENSG00000041515.16	0.0932958	0.236436	3.10669	0.0761054	0.939335	0.999872	ENSG00000041515	MYO16
ENSG00000041802.11	0.720952	1.15482	3.0403	0.379836	0.704067	0.999872	ENSG00000041802	LSG1
ENSG00000041880.14	105.574	0.267846	0.213197	1.25633	0.208996	0.999872	ENSG00000041880	PARP3
ENSG00000041982.16	187.112	-0.163741	0.19245	-0.850821	0.394869	0.999872	ENSG00000041982	TNC
ENSG00000041988.15	132.928	-0.0766012	0.191442	-0.400127	0.689063	0.999872	ENSG00000041988	THAP3
ENSG00000042062.13	7.85858	0.371555	0.722728	0.514101	0.607181	0.999872	ENSG00000042062	RIPOR3
ENSG00000042088.14	0.737903	-1.82363	2.98788	-0.610344	0.541634	0.999872	ENSG00000042088	TDP1
ENSG00000042286.15	84.3241	0.142807	0.191086	0.747344	0.454856	0.999872	ENSG00000042286	AIFM2
ENSG00000042304.12	1.11395	-0.945889	2.72015	-0.347734	0.72804	0.999872	ENSG00000042304	C2orf83
ENSG00000042317.17	16.2784	0.0996481	0.45823	0.217463	0.827847	0.999872	ENSG00000042317	SPATA7
ENSG00000042429.12	104.735	-0.0532925	0.194945	-0.273372	0.784568	0.999872	ENSG00000042429	MED17
ENSG00000042445.14	357.972	-0.02678	0.124304	-0.21544	0.829424	0.999872	ENSG00000042445	RETSAT
ENSG00000042493.16	357.851	-0.177167	0.15965	-1.10972	0.267119	0.999872	ENSG00000042493	CAPG
ENSG00000042753.12	434.443	-0.0492294	0.100275	-0.490946	0.623465	0.999872	ENSG00000042753	AP2S1
ENSG00000042832.12	10.0637	0.822926	1.05867	0.777318	0.436971	0.999872	ENSG00000042832	TG
ENSG00000042980.13	30.1138	0.595807	0.517116	1.15217	0.24925	0.999872	ENSG00000042980	ADAM28
ENSG00000043039.7	0.36786	0.175347	3.07135	0.0570913	0.954472	0.999872	ENSG00000043039	BARX2
ENSG00000043093.15	8.52855	0.225087	2.96723	0.0758577	0.939532	0.999872	ENSG00000043093	DCUN1D1
ENSG00000043143.20	106.907	-0.119374	0.195145	-0.611717	0.540725	0.999872	ENSG00000043143	JADE2
ENSG00000043355.12	0.0457255	-0.577147	3.10685	-0.185766	0.852628	0.999872	ENSG00000043355	ZIC2
ENSG00000043462.13	120.773	-0.219468	0.188065	-1.16698	0.243219	0.999872	ENSG00000043462	LCP2
ENSG00000043514.17	77.6292	0.137849	0.30956	0.445307	0.656098	0.999872	ENSG00000043514	TRIT1
ENSG00000044090.10	0.132296	0.466219	3.10577	0.150114	0.880675	0.999872	ENSG00000044090	CUL7
ENSG00000044115.21	813.55	0.0397035	0.11669	0.340246	0.733671	0.999872	ENSG00000044115	CTNNA1
ENSG00000044446.12	5.20675	-0.402901	0.919149	-0.438341	0.661139	0.999872	ENSG00000044446	PHKA2
ENSG00000044459.15	33.7423	-0.0944225	0.37137	-0.254255	0.799299	0.999872	ENSG00000044459	CNTLN
ENSG00000044524.11	0.088521	-1.02186	3.10195	-0.329425	0.741835	0.999872	ENSG00000044524	EPHA3
ENSG00000046604.13	1.15388	-0.752214	3.02119	-0.248979	0.803377	0.999872	ENSG00000046604	DSG2
ENSG00000046647.13	38.4656	-0.0107063	0.319532	-0.0335063	0.973271	0.999872	ENSG00000046647	GEMIN8
ENSG00000046651.15	32.3295	-0.181526	0.412931	-0.439603	0.660225	0.999872	ENSG00000046651	OFD1
ENSG00000046653.15	18.819	0.0910434	0.470921	0.193331	0.8467	0.999872	ENSG00000046653	GPM6B
ENSG00000046889.19	3.30658	-0.0136272	1.01902	-0.0133729	0.98933	0.999872	ENSG00000046889	PREX2
ENSG00000047056.16	56.1994	-0.138277	0.281954	-0.490424	0.623834	0.999872	ENSG00000047056	WDR37
ENSG00000047188.16	11.4231	-2.66177	0.996056	-2.67231	0.00753318	0.999872	ENSG00000047188	YTHDC2
ENSG00000047230.15	33.1349	-0.656139	0.312189	-2.10173	0.0355765	0.999872	ENSG00000047230	CTPS2
ENSG00000047249.18	174.266	-0.440374	0.226673	-1.94277	0.0520438	0.999872	ENSG00000047249	ATP6V1H
ENSG00000047315.17	12.4228	0.323025	0.566311	0.570403	0.568405	0.999872	ENSG00000047315	POLR2B
ENSG00000047346.12	67.9205	0.173761	0.215281	0.807135	0.419589	0.999872	ENSG00000047346	ATOSA
ENSG00000047365.12	2.73672	-1.45721	1.35869	-1.07251	0.283492	0.999872	ENSG00000047365	ARAP2
ENSG00000047410.14	85.4947	0.0721887	0.25703	0.280857	0.77882	0.999872	ENSG00000047410	TPR
ENSG00000047457.14	828.603	-0.275018	0.144899	-1.89799	0.0576974	0.999872	ENSG00000047457	CP
ENSG00000047578.13	0.732893	1.8991	3.07104	0.618389	0.536319	0.999872	ENSG00000047578	KATNIP
ENSG00000047579.20	5.45575	0.146881	0.733268	0.20031	0.841238	0.999872	ENSG00000047579	DTNBP1
ENSG00000047617.15	1.3308	2.03012	2.092	0.970421	0.331836	0.999872	ENSG00000047617	ANO2
ENSG00000047621.12	29.3453	-0.0588254	0.372501	-0.15792	0.87452	0.999872	ENSG00000047621	C12orf4
ENSG00000047634.15	95.1879	-0.21655	0.268056	-0.807852	0.419176	0.999872	ENSG00000047634	SCML1
ENSG00000047644.19	2.99944	0.406152	1.03792	0.391314	0.695565	0.999872	ENSG00000047644	WWC3
ENSG00000047648.23	15.7902	0.0618621	0.469179	0.131852	0.895102	0.999872	ENSG00000047648	ARHGAP6
ENSG00000047849.21	813.165	-0.00276249	0.113749	-0.0242858	0.980625	0.999872	ENSG00000047849	MAP4
ENSG00000047932.14	185.059	-0.204017	0.21491	-0.949313	0.342462	0.999872	ENSG00000047932	GOPC
ENSG00000048028.11	65.3363	0.238452	0.226166	1.05432	0.291736	0.999872	ENSG00000048028	USP28
ENSG00000048052.22	15.2151	-0.856602	0.522929	-1.63809	0.101404	0.999872	ENSG00000048052	HDAC9
ENSG00000048140.18	130.928	0.132434	0.174276	0.759908	0.44731	0.999872	ENSG00000048140	TSPAN17
ENSG00000048162.21	156.759	-0.0321957	0.142871	-0.225349	0.821708	0.999872	ENSG00000048162	NOP16
ENSG00000048342.17	0.293823	0.472971	3.08609	0.153259	0.878194	0.999872	ENSG00000048342	CC2D2A
ENSG00000048392.12	0.64255	0.105679	2.28484	0.0462522	0.963109	0.999872	ENSG00000048392	RRM2B
ENSG00000048405.10	87.349	0.232633	0.21486	1.08272	0.278933	0.999872	ENSG00000048405	ZNF800
ENSG00000048471.14	8.35335	-0.365894	0.590344	-0.619798	0.535391	0.999872	ENSG00000048471	SNX29
ENSG00000048540.15	6.53088	0.040938	0.743732	0.055044	0.956103	0.999872	ENSG00000048540	LMO3
ENSG00000048649.13	357.28	0.170588	0.159646	1.06853	0.28528	0.999872	ENSG00000048649	RSF1
ENSG00000048707.15	142.684	-0.202677	0.221361	-0.915596	0.359879	0.999872	ENSG00000048707	VPS13D
ENSG00000048740.18	327.325	-0.0310999	0.132011	-0.235585	0.813755	0.999872	ENSG00000048740	CELF2
ENSG00000048828.17	6.13921	0.330276	0.85182	0.38773	0.698216	0.999872	ENSG00000048828	FAM120A
ENSG00000048991.16	67.4361	-0.112414	0.254963	-0.440903	0.659283	0.999872	ENSG00000048991	R3HDM1
ENSG00000049089.15	0.978546	-0.165367	3.07459	-0.0537849	0.957107	0.999872	ENSG00000049089	COL9A2
ENSG00000049130.16	74.2769	-0.11544	0.258923	-0.445847	0.655708	0.999872	ENSG00000049130	KITLG
ENSG00000049167.15	17.6757	-0.255271	0.633482	-0.402964	0.686974	0.999872	ENSG00000049167	ERCC8
ENSG00000049192.15	0.649867	0.867845	3.07524	0.282204	0.777787	0.999872	ENSG00000049192	ADAMTS6
ENSG00000049239.13	322.919	-0.199188	0.161539	-1.23306	0.217552	0.999872	ENSG00000049239	H6PD
ENSG00000049245.13	0.537105	-0.338333	3.07233	-0.110123	0.912312	0.999872	ENSG00000049245	VAMP3
ENSG00000049246.14	28.5601	-0.144923	0.450068	-0.322003	0.747451	0.999872	ENSG00000049246	PER3
ENSG00000049247.14	0.0743458	0.433745	3.10198	0.139828	0.888795	0.999872	ENSG00000049247	UTS2
ENSG00000049249.9	38.0491	0.33556	0.425889	0.787905	0.430753	0.999872	ENSG00000049249	TNFRSF9
ENSG00000049283.18	0.0661481	0.260191	3.11135	0.0836263	0.933354	0.999872	ENSG00000049283	EPN3
ENSG00000049323.16	206.298	0.0686926	0.16752	0.410056	0.681765	0.999872	ENSG00000049323	LTBP1
ENSG00000049449.10	0.0743458	0.433745	3.10198	0.139828	0.888795	0.999872	ENSG00000049449	RCN1
ENSG00000049540.18	25.5013	-0.512981	0.426161	-1.20372	0.228696	0.999872	ENSG00000049540	ELN
ENSG00000049541.11	39.054	0.0717498	0.33417	0.214711	0.829993	0.999872	ENSG00000049541	RFC2
ENSG00000049618.24	324.645	-0.205457	0.183494	-1.1197	0.262844	0.999872	ENSG00000049618	ARID1B
ENSG00000049656.14	595.79	0.169073	0.145127	1.165	0.244019	0.999872	ENSG00000049656	CLPTM1L
ENSG00000049759.19	330.938	0.328778	0.171377	1.91844	0.0550546	0.999872	ENSG00000049759	NEDD4L
ENSG00000049768.16	0.0668953	-0.63031	3.11459	-0.202374	0.839625	0.999872	ENSG00000049768	FOXP3
ENSG00000049769.14	4.75654	0.297981	0.921848	0.323243	0.746511	0.999872	ENSG00000049769	PPP1R3F
ENSG00000049860.14	463.179	0.0955027	0.117785	0.810822	0.417468	0.999872	ENSG00000049860	HEXB
ENSG00000049883.15	13.7237	0.716366	0.557081	1.28593	0.198468	0.999872	ENSG00000049883	PTCD2
ENSG00000050130.18	186.727	-0.386043	0.203366	-1.89827	0.0576603	0.999872	ENSG00000050130	JKAMP
ENSG00000050165.18	90.8825	-0.119125	0.198133	-0.601235	0.547683	0.999872	ENSG00000050165	DKK3
ENSG00000050327.15	41.2975	-0.0925506	0.325607	-0.284241	0.776226	0.999872	ENSG00000050327	ARHGEF5
ENSG00000050344.9	10.6097	-0.458799	0.680838	-0.673874	0.500391	0.999872	ENSG00000050344	NFE2L3
ENSG00000050393.11	131.056	-0.244136	0.232604	-1.04958	0.293913	0.999872	ENSG00000050393	MCUR1
ENSG00000050405.13	180.512	-0.226234	0.153074	-1.47794	0.139424	0.999872	ENSG00000050405	LIMA1
ENSG00000050426.16	71.9188	-0.156993	0.228817	-0.686108	0.492645	0.999872	ENSG00000050426	LETMD1
ENSG00000050438.17	6.17662	1.78718	0.90025	1.9852	0.047122	0.999872	ENSG00000050438	SLC4A8
ENSG00000050555.19	255.099	-0.0247279	0.170453	-0.145072	0.884654	0.999872	ENSG00000050555	LAMC3
ENSG00000050628.20	5.05662	-0.00945177	0.800688	-0.0118046	0.990582	0.999872	ENSG00000050628	PTGER3
ENSG00000050748.18	7.07417	0.459764	0.870454	0.528188	0.597369	0.999872	ENSG00000050748	MAPK9
ENSG00000050767.17	2.091	2.88055	3.01614	0.955044	0.339556	0.999872	ENSG00000050767	COL23A1
ENSG00000050820.17	850.179	-0.0900363	0.120638	-0.746337	0.455464	0.999872	ENSG00000050820	BCAR1
ENSG00000051009.11	0.731023	0.343087	2.87601	0.119293	0.905043	0.999872	ENSG00000051009	FHIP1B
ENSG00000051108.15	23.187	-0.354742	0.379772	-0.934092	0.350257	0.999872	ENSG00000051108	HERPUD1
ENSG00000051128.19	311.392	-0.164092	0.149803	-1.09539	0.273348	0.999872	ENSG00000051128	HOMER3
ENSG00000051180.17	0.136052	-0.0803719	3.09419	-0.0259751	0.979277	0.999872	ENSG00000051180	RAD51
ENSG00000051341.14	1.88808	0.998709	2.14904	0.464722	0.64213	0.999872	ENSG00000051341	POLQ
ENSG00000051382.9	100.14	-0.058711	0.301079	-0.195002	0.845391	0.999872	ENSG00000051382	PIK3CB
ENSG00000051523.11	1.30361	-0.145157	1.39402	-0.104128	0.917068	0.999872	ENSG00000051523	CYBA
ENSG00000051596.10	1.24502	-1.34048	1.81161	-0.73994	0.459337	0.999872	ENSG00000051596	THOC3
ENSG00000051620.11	126.161	-0.0918044	0.269974	-0.340049	0.733819	0.999872	ENSG00000051620	HEBP2
ENSG00000051825.15	67.7642	0.665021	0.389325	1.70814	0.0876108	0.999872	ENSG00000051825	MPHOSPH9
ENSG00000052126.14	100.888	-0.122781	0.240111	-0.511352	0.609105	0.999872	ENSG00000052126	PLEKHA5
ENSG00000052344.16	1.10779	-0.411773	3.07009	-0.134124	0.893305	0.999872	ENSG00000052344	PRSS8
ENSG00000052723.12	97.965	0.61714	0.244829	2.52069	0.0117124	0.999872	ENSG00000052723	SIKE1
ENSG00000052749.14	155.003	0.154599	0.168195	0.919165	0.358009	0.999872	ENSG00000052749	RRP12
ENSG00000052795.13	36.6453	0.378996	0.462773	0.818968	0.412804	0.999872	ENSG00000052795	FNIP2
ENSG00000052802.13	2.61135	0.895415	1.12575	0.795391	0.426386	0.999872	ENSG00000052802	MSMO1
ENSG00000052841.15	296.121	-0.177779	0.138608	-1.28261	0.19963	0.999872	ENSG00000052841	TTC17
ENSG00000053108.17	0.388573	-0.65474	3.08818	-0.212015	0.832095	0.999872	ENSG00000053108	FSTL4
ENSG00000053254.16	349.233	0.0234581	0.146478	0.160148	0.872765	0.999872	ENSG00000053254	FOXN3
ENSG00000053371.12	239.465	0.230772	0.140292	1.64494	0.0999824	0.999872	ENSG00000053371	AKR7A2
ENSG00000053372.5	0.13522	0.952895	3.09893	0.307492	0.758469	0.999872	ENSG00000053372	MRTO4
ENSG00000053501.13	82.9755	-0.79291	0.371442	-2.13468	0.032787	0.999872	ENSG00000053501	USE1
ENSG00000053524.12	2.84904	0.00887701	1.23931	0.00716284	0.994285	0.999872	ENSG00000053524	MCF2L2
ENSG00000053747.17	23.8723	1.34428	0.418262	3.21395	0.00130921	0.999872	ENSG00000053747	LAMA3
ENSG00000053770.12	10.3143	-0.776194	0.585587	-1.3255	0.185006	0.999872	ENSG00000053770	AP5M1
ENSG00000053900.11	3.63382	-1.49474	1.95874	-0.763111	0.445397	0.999872	ENSG00000053900	ANAPC4
ENSG00000054116.12	382.364	0.172776	0.13094	1.31951	0.187	0.999872	ENSG00000054116	TRAPPC3
ENSG00000054118.15	285.96	-0.0210277	0.12829	-0.163908	0.869803	0.999872	ENSG00000054118	THRAP3
ENSG00000054148.18	629.858	0.0128713	0.114555	0.112359	0.910539	0.999872	ENSG00000054148	PHPT1
ENSG00000054219.11	1.91084	0.274947	1.42738	0.192623	0.847254	0.999872	ENSG00000054219	LY75
ENSG00000054267.22	300.028	0.0968999	0.169805	0.570653	0.568235	0.999872	ENSG00000054267	ARID4B
ENSG00000054277.14	0.706133	0.720865	2.99057	0.241046	0.809519	0.999872	ENSG00000054277	OPN3
ENSG00000054282.16	163.787	0.222157	0.179094	1.24045	0.214808	0.999872	ENSG00000054282	SDCCAG8
ENSG00000054356.14	2.00899	1.55444	1.53894	1.01007	0.312462	0.999872	ENSG00000054356	PTPRN
ENSG00000054392.13	6.45839	-0.331683	0.695536	-0.476874	0.633452	0.999872	ENSG00000054392	HHAT
ENSG00000054523.18	220.316	-0.0617326	0.150565	-0.410006	0.681802	0.999872	ENSG00000054523	KIF1B
ENSG00000054611.14	131.905	-0.190096	0.179926	-1.05653	0.290728	0.999872	ENSG00000054611	TBC1D22A
ENSG00000054654.19	215.483	0.173779	0.13955	1.24529	0.213027	0.999872	ENSG00000054654	SYNE2
ENSG00000054690.14	27.4562	-0.206744	0.375411	-0.550712	0.581831	0.999872	ENSG00000054690	PLEKHH1
ENSG00000054793.14	90.3554	0.167801	0.249302	0.673081	0.500896	0.999872	ENSG00000054793	ATP9A
ENSG00000054938.16	32.4736	0.00622189	0.318992	0.0195048	0.984438	0.999872	ENSG00000054938	CHRDL2
ENSG00000054965.11	69.5214	0.0474792	0.282583	0.168018	0.866569	0.999872	ENSG00000054965	FAM168A
ENSG00000054967.13	198.15	0.0250754	0.149364	0.167881	0.866677	0.999872	ENSG00000054967	RELT
ENSG00000054983.17	0.652097	0.851974	3.07366	0.277186	0.781637	0.999872	ENSG00000054983	GALC
ENSG00000055044.11	3.9517	-0.00925171	1.23691	-0.0074797	0.994032	0.999872	ENSG00000055044	NOP58
ENSG00000055070.17	410.219	-0.121442	0.122883	-0.988275	0.323018	0.999872	ENSG00000055070	SZRD1
ENSG00000055118.16	0.695768	-0.848958	2.98275	-0.284623	0.775933	0.999872	ENSG00000055118	KCNH2
ENSG00000055147.19	0.508824	-0.705267	3.08247	-0.228799	0.819025	0.999872	ENSG00000055147	FAM114A2
ENSG00000055163.20	76.6503	-0.0360412	0.275531	-0.130806	0.895928	0.999872	ENSG00000055163	CYFIP2
ENSG00000055208.19	207.752	0.0353562	0.165571	0.213541	0.830905	0.999872	ENSG00000055208	TAB2
ENSG00000055211.14	0.139021	-0.170895	3.09982	-0.0551307	0.956034	0.999872	ENSG00000055211	GINM1
ENSG00000055332.18	136.738	0.283217	0.968582	0.292403	0.769978	0.999872	ENSG00000055332	EIF2AK2
ENSG00000055483.19	273.487	0.245896	0.178357	1.37867	0.167996	0.999872	ENSG00000055483	USP36
ENSG00000055609.19	216.112	-0.115967	0.192238	-0.603245	0.546346	0.999872	ENSG00000055609	KMT2C
ENSG00000055732.13	3.70301	1.30568	1.1235	1.16215	0.245174	0.999872	ENSG00000055732	MCOLN3
ENSG00000055917.16	263.656	-0.0463513	0.134722	-0.344053	0.730806	0.999872	ENSG00000055917	PUM2
ENSG00000055950.16	358.099	-0.0268407	0.107387	-0.249943	0.802632	0.999872	ENSG00000055950	MRPL43
ENSG00000055955.17	59.8307	0.212527	0.312752	0.679539	0.496796	0.999872	ENSG00000055955	ITIH4
ENSG00000055957.11	1255.54	-0.0836571	0.133996	-0.624324	0.532415	0.999872	ENSG00000055957	ITIH1
ENSG00000056050.7	1.04273	-2.15409	3.07701	-0.700059	0.483891	0.999872	ENSG00000056050	HPF1
ENSG00000056097.16	0.0457255	-0.577147	3.10685	-0.185766	0.852628	0.999872	ENSG00000056097	ZFR
ENSG00000056291.17	0.0587645	0.288426	3.11445	0.0926088	0.926214	0.999872	ENSG00000056291	NPFFR2
ENSG00000056487.16	0.305476	0.0497947	3.08202	0.0161565	0.98711	0.999872	ENSG00000056487	PHF21B
ENSG00000056558.11	72.5248	0.117706	0.285988	0.411577	0.68065	0.999872	ENSG00000056558	TRAF1
ENSG00000056586.16	149.674	-0.259388	0.252101	-1.0289	0.303526	0.999872	ENSG00000056586	RC3H2
ENSG00000056736.10	0.229515	0.57921	3.10243	0.186696	0.851899	0.999872	ENSG00000056736	IL17RB
ENSG00000056972.20	1.29288	0.739611	1.64679	0.449122	0.653344	0.999872	ENSG00000056972	TRAF3IP2
ENSG00000056998.20	21.9163	0.690725	0.478507	1.4435	0.148879	0.999872	ENSG00000056998	GYG2
ENSG00000057019.16	9.66812	-0.965561	0.9249	-1.04396	0.296503	0.999872	ENSG00000057019	DCBLD2
ENSG00000057149.16	0.085591	-0.764333	3.10125	-0.246459	0.805327	0.999872	ENSG00000057149	SERPINB3
ENSG00000057294.15	10.4647	0.824487	0.6958	1.18495	0.236038	0.999872	ENSG00000057294	PKP2
ENSG00000057593.14	238.673	-0.0256734	0.189508	-0.135474	0.892237	0.999872	ENSG00000057593	F7
ENSG00000057608.17	0.907125	0.675049	3.04558	0.221649	0.824587	0.999872	ENSG00000057608	GDI2
ENSG00000057657.17	115.939	-0.0634438	0.241632	-0.262564	0.792887	0.999872	ENSG00000057657	PRDM1
ENSG00000057663.16	86.3209	-0.508947	0.4984	-1.02116	0.307178	0.999872	ENSG00000057663	ATG5
ENSG00000057704.13	0.179972	-1.29359	3.09665	-0.417739	0.676138	0.999872	ENSG00000057704	TMCC3
ENSG00000057757.10	177.887	0.132494	0.142554	0.929433	0.352665	0.999872	ENSG00000057757	PITHD1
ENSG00000057935.14	66.0728	0.0237998	0.324241	0.0734016	0.941487	0.999872	ENSG00000057935	MTA3
ENSG00000058056.9	14.7793	2.08409	0.824594	2.52741	0.0114907	0.999872	ENSG00000058056	USP13
ENSG00000058063.16	42.5218	0.15427	0.331323	0.46562	0.641487	0.999872	ENSG00000058063	ATP11B
ENSG00000058085.15	23.8282	0.331292	0.392319	0.844447	0.398419	0.999872	ENSG00000058085	LAMC2
ENSG00000058091.17	2.11499	-0.314979	1.52241	-0.206895	0.836092	0.999872	ENSG00000058091	CDK14
ENSG00000058262.10	896.558	0.00809719	0.0778233	0.104046	0.917133	0.999872	ENSG00000058262	SEC61A1
ENSG00000058272.19	375.865	-0.0690647	0.1655	-0.41731	0.676452	0.999872	ENSG00000058272	PPP1R12A
ENSG00000058335.16	0.170283	1.0169	3.08914	0.329185	0.742016	0.999872	ENSG00000058335	RASGRF1
ENSG00000058404.20	28.52	-0.374569	0.495203	-0.756396	0.449412	0.999872	ENSG00000058404	CAMK2B
ENSG00000058453.17	2.14897	-1.37113	1.68443	-0.814006	0.415642	0.999872	ENSG00000058453	CROCC
ENSG00000058600.16	77.1432	-0.112083	0.337347	-0.33225	0.739701	0.999872	ENSG00000058600	POLR3E
ENSG00000058668.15	240.147	0.0940941	0.230355	0.408475	0.682925	0.999872	ENSG00000058668	ATP2B4
ENSG00000058673.17	597.743	-0.0170967	0.0960243	-0.178046	0.858687	0.999872	ENSG00000058673	ZC3H11A
ENSG00000058729.11	3.42775	-1.41645	1.42254	-0.995715	0.319389	0.999872	ENSG00000058729	RIOK2
ENSG00000058799.15	103.695	0.0629468	0.192606	0.326816	0.743807	0.999872	ENSG00000058799	YIPF1
ENSG00000058866.15	6.01264	-1.25906	0.888437	-1.41717	0.156434	0.999872	ENSG00000058866	DGKG
ENSG00000059122.17	47.9507	-0.132391	0.561403	-0.235822	0.813571	0.999872	ENSG00000059122	FLYWCH1
ENSG00000059145.19	73.9003	-0.112899	0.27302	-0.41352	0.679226	0.999872	ENSG00000059145	UNKL
ENSG00000059377.18	37.2136	-0.202952	0.31571	-0.642842	0.520327	0.999872	ENSG00000059377	TBXAS1
ENSG00000059378.13	2.78612	-0.983767	1.14739	-0.857397	0.391225	0.999872	ENSG00000059378	PARP12
ENSG00000059588.10	31.3128	-0.57397	0.48628	-1.18033	0.237869	0.999872	ENSG00000059588	TARBP1
ENSG00000059691.12	10.936	-0.0426667	0.604515	-0.07058	0.943732	0.999872	ENSG00000059691	GATB
ENSG00000059728.11	35.8145	0.0657717	0.322769	0.203773	0.838531	0.999872	ENSG00000059728	MXD1
ENSG00000059758.8	1.95363	-1.06923	1.85379	-0.576782	0.564087	0.999872	ENSG00000059758	CDK17
ENSG00000059769.20	49.7155	-0.885015	0.458088	-1.93198	0.0533624	0.999872	ENSG00000059769	DNAJC25
ENSG00000059804.16	137.406	0.0589194	0.190039	0.310039	0.756531	0.999872	ENSG00000059804	SLC2A3
ENSG00000059915.17	3.13144	0.670726	1.17058	0.572986	0.566654	0.999872	ENSG00000059915	PSD
ENSG00000060138.13	779.628	-0.0350469	0.142767	-0.245483	0.806083	0.999872	ENSG00000060138	YBX3
ENSG00000060237.18	7.16945	-0.537374	1.19042	-0.451415	0.651691	0.999872	ENSG00000060237	WNK1
ENSG00000060339.14	103.416	-0.230183	0.227211	-1.01308	0.311021	0.999872	ENSG00000060339	CCAR1
ENSG00000060491.16	201.457	-0.0113238	0.133537	-0.0847988	0.932421	0.999872	ENSG00000060491	OGFR
ENSG00000060656.20	107.296	-0.136335	0.192981	-0.706466	0.479898	0.999872	ENSG00000060656	PTPRU
ENSG00000060688.13	0.111519	0.456031	3.09349	0.147416	0.882804	0.999872	ENSG00000060688	SNRNP40
ENSG00000060709.15	0.644468	-0.505609	3.05229	-0.165649	0.868433	0.999872	ENSG00000060709	RIMBP2
ENSG00000060718.22	0.928808	-0.782739	3.0511	-0.256543	0.797532	0.999872	ENSG00000060718	COL11A1
ENSG00000060749.16	147.913	-0.0412188	0.193681	-0.212818	0.831469	0.999872	ENSG00000060749	QSER1
ENSG00000060762.19	6.99129	-0.711881	0.809125	-0.879816	0.378959	0.999872	ENSG00000060762	MPC1
ENSG00000060971.19	190.436	0.0969404	0.1821	0.532346	0.594487	0.999872	ENSG00000060971	ACAA1
ENSG00000060982.15	1.50938	0.0729826	1.48359	0.0491933	0.960765	0.999872	ENSG00000060982	BCAT1
ENSG00000061273.18	535.405	0.189963	0.166672	1.13974	0.254395	0.999872	ENSG00000061273	HDAC7
ENSG00000061337.15	138.683	-0.218499	0.177785	-1.229	0.219071	0.999872	ENSG00000061337	LZTS1
ENSG00000061656.10	27.5736	-0.0233074	0.465586	-0.0500603	0.960074	0.999872	ENSG00000061656	SPAG4
ENSG00000061676.15	5.32209	-1.13794	0.897672	-1.26766	0.204921	0.999872	ENSG00000061676	NCKAP1
ENSG00000061794.13	1.47425	-1.84489	3.05858	-0.603187	0.546384	0.999872	ENSG00000061794	MRPS35
ENSG00000061918.14	0.426119	1.27948	3.07259	0.416417	0.677105	0.999872	ENSG00000061918	GUCY1B1
ENSG00000061936.10	30.7065	-1.27475	0.494893	-2.57581	0.0100005	0.999872	ENSG00000061936	SFSWAP
ENSG00000061987.16	90.4469	0.255979	0.309578	0.826862	0.408315	0.999872	ENSG00000061987	MON2
ENSG00000062038.14	0.846777	-1.19952	2.83914	-0.422495	0.672664	0.999872	ENSG00000062038	CDH3
ENSG00000062096.15	0.209493	-0.599044	3.09304	-0.193675	0.846431	0.999872	ENSG00000062096	ARSF
ENSG00000062194.16	282.043	-0.0450309	0.1719	-0.26196	0.793352	0.999872	ENSG00000062194	GPBP1
ENSG00000062282.15	193.247	0.148619	0.146577	1.01393	0.310617	0.999872	ENSG00000062282	DGAT2
ENSG00000062370.17	0.186592	0.416921	3.10324	0.13435	0.893126	0.999872	ENSG00000062370	ZNF112
ENSG00000062485.19	269.192	-0.181782	0.230745	-0.787805	0.430811	0.999872	ENSG00000062485	CS
ENSG00000062524.16	21.3916	-0.471922	0.401258	-1.17611	0.239552	0.999872	ENSG00000062524	LTK
ENSG00000062582.14	4.21639	0.857312	0.968187	0.885483	0.375896	0.999872	ENSG00000062582	MRPS24
ENSG00000062598.18	5.01648	-1.34907	1.36054	-0.991566	0.321409	0.999872	ENSG00000062598	ELMO2
ENSG00000062650.19	285.788	0.106927	0.213981	0.499703	0.617285	0.999872	ENSG00000062650	WAPL
ENSG00000062716.13	869.187	-0.248664	0.0954722	-2.60457	0.00919908	0.999872	ENSG00000062716	VMP1
ENSG00000062725.10	14.4559	-0.180245	0.478091	-0.377009	0.706167	0.999872	ENSG00000062725	APPBP2
ENSG00000062822.15	30.1673	-0.643345	0.365158	-1.76182	0.0780989	0.999872	ENSG00000062822	POLD1
ENSG00000063015.20	0.306347	0.296789	3.08774	0.0961186	0.923426	0.999872	ENSG00000063015	SEZ6
ENSG00000063046.18	8.9491	0.370545	0.608582	0.608866	0.542613	0.999872	ENSG00000063046	EIF4B
ENSG00000063127.16	6.53068	-0.433239	0.665285	-0.651209	0.514912	0.999872	ENSG00000063127	SLC6A16
ENSG00000063169.11	84.831	-0.00095092	0.21882	-0.00434568	0.996533	0.999872	ENSG00000063169	BICRA
ENSG00000063176.16	53.8014	-0.00173493	0.284164	-0.00610537	0.995129	0.999872	ENSG00000063176	SPHK2
ENSG00000063177.13	6168.13	0.0753635	0.0734884	1.02552	0.30512	0.999872	ENSG00000063177	RPL18
ENSG00000063180.9	52.798	0.505532	0.331695	1.52409	0.127487	0.999872	ENSG00000063180	CA11
ENSG00000063241.8	180.64	0.152954	0.152771	1.0012	0.316732	0.999872	ENSG00000063241	ISOC2
ENSG00000063244.13	1305.94	-0.234418	0.099812	-2.34859	0.0188444	0.999872	ENSG00000063244	U2AF2
ENSG00000063322.15	0.255218	-1.0469	3.08559	-0.339286	0.734394	0.999872	ENSG00000063322	MED29
ENSG00000063438.19	1.22951	0.96687	3.05625	0.316358	0.751731	0.999872	ENSG00000063438	AHRR
ENSG00000063587.15	178.788	0.0101647	0.134407	0.0756261	0.939717	0.999872	ENSG00000063587	ZNF275
ENSG00000063601.17	93.8691	-0.0412788	0.219794	-0.187807	0.851028	0.999872	ENSG00000063601	MTMR1
ENSG00000063660.9	0.102116	0.249189	3.11175	0.0800799	0.936174	0.999872	ENSG00000063660	GPC1
ENSG00000063761.16	14.5844	-0.175769	0.508911	-0.345383	0.729806	0.999872	ENSG00000063761	ADCK1
ENSG00000063854.13	373.637	-0.0465837	0.162457	-0.286744	0.774308	0.999872	ENSG00000063854	HAGH
ENSG00000063978.16	35.43	-1.20847	0.963345	-1.25445	0.209677	0.999872	ENSG00000063978	RNF4
ENSG00000064012.22	282.051	-0.330042	0.17955	-1.83816	0.0660381	0.999872	ENSG00000064012	CASP8
ENSG00000064042.18	184.367	-0.0719511	0.1544	-0.466003	0.641213	0.999872	ENSG00000064042	LIMCH1
ENSG00000064102.15	185.043	-0.337983	0.243319	-1.38906	0.164816	0.999872	ENSG00000064102	INTS13
ENSG00000064115.11	4.39321	0.8117	1.09615	0.740503	0.458995	0.999872	ENSG00000064115	TM7SF3
ENSG00000064195.7	0.928704	-0.175083	2.72116	-0.0643412	0.948699	0.999872	ENSG00000064195	DLX3
ENSG00000064199.7	9.6189	-0.311322	0.688676	-0.452058	0.651227	0.999872	ENSG00000064199	SPA17
ENSG00000064201.16	1.80926	0.486424	1.46356	0.332358	0.739619	0.999872	ENSG00000064201	TSPAN32
ENSG00000064205.10	24.2879	0.0417148	0.596866	0.0698897	0.944281	0.999872	ENSG00000064205	CCN5
ENSG00000064225.12	113.436	-0.0381445	0.203934	-0.187043	0.851627	0.999872	ENSG00000064225	ST3GAL6
ENSG00000064270.13	35.549	-0.42975	0.454473	-0.945602	0.344352	0.999872	ENSG00000064270	ATP2C2
ENSG00000064309.14	11.3545	0.493231	0.51274	0.961952	0.336073	0.999872	ENSG00000064309	CDON
ENSG00000064313.12	11.7659	0.200677	1.06962	0.187615	0.851178	0.999872	ENSG00000064313	TAF2
ENSG00000064393.16	4.93666	0.61131	0.893099	0.684481	0.493671	0.999872	ENSG00000064393	HIPK2
ENSG00000064419.13	291.748	0.065619	0.113642	0.577419	0.563656	0.999872	ENSG00000064419	TNPO3
ENSG00000064490.14	34.2051	-0.0322498	0.407839	-0.0790748	0.936973	0.999872	ENSG00000064490	RFXANK
ENSG00000064545.15	209.784	0.0697918	0.16544	0.421855	0.673131	0.999872	ENSG00000064545	TMEM161A
ENSG00000064547.14	36.2326	0.0367206	0.341996	0.107372	0.914494	0.999872	ENSG00000064547	LPAR2
ENSG00000064601.20	24.6364	0.141184	0.602877	0.234184	0.814842	0.999872	ENSG00000064601	CTSA
ENSG00000064607.17	187.124	0.178389	0.171324	1.04124	0.297766	0.999872	ENSG00000064607	SUGP2
ENSG00000064651.14	11.8999	0.466329	0.523903	0.890104	0.37341	0.999872	ENSG00000064651	SLC12A2
ENSG00000064652.11	10.8093	1.15066	0.836761	1.37513	0.169091	0.999872	ENSG00000064652	SNX24
ENSG00000064655.19	3.14971	-1.56976	1.36263	-1.152	0.24932	0.999872	ENSG00000064655	EYA2
ENSG00000064666.15	570.215	-0.0881771	0.131934	-0.668342	0.503916	0.999872	ENSG00000064666	CNN2
ENSG00000064687.13	22.7781	0.493794	0.380353	1.29825	0.194201	0.999872	ENSG00000064687	ABCA7
ENSG00000064692.20	0.174349	-0.440807	3.09985	-0.142203	0.88692	0.999872	ENSG00000064692	SNCAIP
ENSG00000064703.12	16.7244	0.263035	1.05108	0.250251	0.802393	0.999872	ENSG00000064703	DDX20
ENSG00000064763.11	1.16834	-1.48192	3.04458	-0.486743	0.626441	0.999872	ENSG00000064763	FAR2
ENSG00000064787.13	3.43847	0.337765	0.966866	0.34934	0.726834	0.999872	ENSG00000064787	BCAS1
ENSG00000064835.11	0.453351	-0.219365	3.05648	-0.0717705	0.942785	0.999872	ENSG00000064835	POU1F1
ENSG00000064886.14	7.54011	-0.348011	0.895909	-0.388445	0.697687	0.999872	ENSG00000064886	CHI3L2
ENSG00000064932.16	0.705894	-0.315446	3.03528	-0.103927	0.917228	0.999872	ENSG00000064932	SBNO2
ENSG00000064933.18	72.3699	-0.0877976	0.229005	-0.383388	0.701432	0.999872	ENSG00000064933	PMS1
ENSG00000064961.19	48.4092	0.451565	0.758263	0.595525	0.551492	0.999872	ENSG00000064961	HMG20B
ENSG00000064989.13	10.9391	-0.275831	0.537912	-0.51278	0.608105	0.999872	ENSG00000064989	CALCRL
ENSG00000064995.18	163.241	-0.0158067	0.144483	-0.109402	0.912884	0.999872	ENSG00000064995	TAF11
ENSG00000064999.15	0.0427955	-0.630994	3.11466	-0.202589	0.839457	0.999872	ENSG00000064999	ANKS1A
ENSG00000065000.19	934.108	-0.0390571	0.0871347	-0.448238	0.653981	0.999872	ENSG00000065000	AP3D1
ENSG00000065029.15	20.6729	0.0694964	1.98478	0.0350146	0.972068	0.999872	ENSG00000065029	ZNF76
ENSG00000065054.14	0.514634	-1.30267	3.07638	-0.423442	0.671973	0.999872	ENSG00000065054	SLC9A3R2
ENSG00000065057.9	142.398	-0.074127	0.258662	-0.286579	0.774435	0.999872	ENSG00000065057	NTHL1
ENSG00000065060.17	0.2376	0.677571	3.0866	0.21952	0.826245	0.999872	ENSG00000065060	BLTP3A
ENSG00000065150.21	4.73552	-1.76838	1.36066	-1.29965	0.19372	0.999872	ENSG00000065150	IPO5
ENSG00000065154.12	190.408	-0.108524	0.168275	-0.644921	0.518978	0.999872	ENSG00000065154	OAT
ENSG00000065183.16	0.230739	0.0752029	3.09755	0.0242782	0.980631	0.999872	ENSG00000065183	WDR3
ENSG00000065243.20	1.32824	0.514013	2.14645	0.239471	0.81074	0.999872	ENSG00000065243	PKN2
ENSG00000065268.11	0.102116	0.249189	3.11175	0.0800799	0.936174	0.999872	ENSG00000065268	WDR18
ENSG00000065320.9	0.575943	-0.840632	3.07095	-0.273736	0.784287	0.999872	ENSG00000065320	NTN1
ENSG00000065328.17	1.30878	-0.0945365	3.03238	-0.0311757	0.975129	0.999872	ENSG00000065328	MCM10
ENSG00000065357.20	234.999	0.189028	0.192106	0.983977	0.325127	0.999872	ENSG00000065357	DGKA
ENSG00000065361.16	78.232	0.562129	0.571808	0.983074	0.325571	0.999872	ENSG00000065361	ERBB3
ENSG00000065371.17	0.0743458	0.433745	3.10198	0.139828	0.888795	0.999872	ENSG00000065371	ROPN1
ENSG00000065413.20	61.3547	0.0794537	0.242017	0.328298	0.742687	0.999872	ENSG00000065413	ANKRD44
ENSG00000065427.15	922.067	-0.0504123	0.0868402	-0.580518	0.561565	0.999872	ENSG00000065427	KARS1
ENSG00000065457.10	94.1851	0.147955	0.214073	0.691145	0.489475	0.999872	ENSG00000065457	ADAT1
ENSG00000065485.20	160.931	0.0217412	0.154441	0.140773	0.888049	0.999872	ENSG00000065485	PDIA5
ENSG00000065491.8	63.0443	0.0977517	0.224404	0.435606	0.663123	0.999872	ENSG00000065491	TBC1D22B
ENSG00000065518.8	10.9612	-0.131469	0.539767	-0.243566	0.807567	0.999872	ENSG00000065518	NDUFB4
ENSG00000065526.12	3.89224	-0.768405	0.956703	-0.803179	0.421871	0.999872	ENSG00000065526	SPEN
ENSG00000065534.19	197.33	0.0970028	0.207677	0.467084	0.64044	0.999872	ENSG00000065534	MYLK
ENSG00000065548.18	4.37129	0.0423256	1.16093	0.0364585	0.970917	0.999872	ENSG00000065548	ZC3H15
ENSG00000065559.15	82.1414	-0.0988679	0.22866	-0.432379	0.665466	0.999872	ENSG00000065559	MAP2K4
ENSG00000065600.13	0.308529	-0.959585	3.09283	-0.310261	0.756362	0.999872	ENSG00000065600	PACC1
ENSG00000065613.15	282.513	-0.403444	0.234225	-1.72246	0.0849855	0.999872	ENSG00000065613	SLK
ENSG00000065618.21	2.86031	-0.499968	1.17597	-0.425156	0.670723	0.999872	ENSG00000065618	COL17A1
ENSG00000065621.15	27.9384	0.554855	0.4142	1.33958	0.180381	0.999872	ENSG00000065621	GSTO2
ENSG00000065665.21	41.6082	0.103956	0.313728	0.331357	0.740375	0.999872	ENSG00000065665	SEC61A2
ENSG00000065675.15	11.1031	0.296347	0.601354	0.4928	0.622154	0.999872	ENSG00000065675	PRKCQ
ENSG00000065717.15	55.8116	0.078907	0.470226	0.167807	0.866735	0.999872	ENSG00000065717	TLE2
ENSG00000065802.12	65.1089	-0.200604	0.231873	-0.865145	0.386959	0.999872	ENSG00000065802	ASB1
ENSG00000065809.13	514.891	-0.0983048	0.118664	-0.828432	0.407426	0.999872	ENSG00000065809	FAM107B
ENSG00000065882.16	212.084	0.132175	0.170751	0.774082	0.438882	0.999872	ENSG00000065882	TBC1D1
ENSG00000065883.16	128.435	0.40116	0.295766	1.35634	0.174991	0.999872	ENSG00000065883	CDK13
ENSG00000065911.13	25.8601	1.19706	2.96814	0.403303	0.686725	0.999872	ENSG00000065911	MTHFD2
ENSG00000065923.10	0.532167	0.752569	2.7247	0.276202	0.782393	0.999872	ENSG00000065923	SLC9A7
ENSG00000065978.19	0.365947	-0.878601	3.08545	-0.284756	0.775831	0.999872	ENSG00000065978	YBX1
ENSG00000065989.16	0.310003	-0.204091	3.09315	-0.0659818	0.947392	0.999872	ENSG00000065989	PDE4A
ENSG00000066027.12	0.198444	0.57267	3.10188	0.18462	0.853527	0.999872	ENSG00000066027	PPP2R5A
ENSG00000066032.18	0.215115	-1.33078	3.10131	-0.429101	0.66785	0.999872	ENSG00000066032	CTNNA2
ENSG00000066044.15	27.2095	0.122711	0.340082	0.360827	0.718229	0.999872	ENSG00000066044	ELAVL1
ENSG00000066056.14	34.8886	-0.110841	0.30821	-0.359627	0.719126	0.999872	ENSG00000066056	TIE1
ENSG00000066084.13	13.894	0.656934	0.718227	0.91466	0.36037	0.999872	ENSG00000066084	DIP2B
ENSG00000066136.20	268.253	0.115497	0.138961	0.831152	0.405888	0.999872	ENSG00000066136	NFYC
ENSG00000066230.12	28.6542	-0.237959	0.3995	-0.595641	0.551415	0.999872	ENSG00000066230	SLC9A3
ENSG00000066248.15	1.43511	0.805839	1.76828	0.455719	0.648592	0.999872	ENSG00000066248	NGEF
ENSG00000066279.18	2.15317	-0.630577	1.90222	-0.331495	0.740271	0.999872	ENSG00000066279	ASPM
ENSG00000066294.15	156.477	0.0290191	0.203193	0.142815	0.886436	0.999872	ENSG00000066294	CD84
ENSG00000066322.15	1.04102	-0.945811	2.67423	-0.353676	0.723581	0.999872	ENSG00000066322	ELOVL1
ENSG00000066379.15	107.44	0.0494244	0.192972	0.256123	0.797856	0.999872	ENSG00000066379	POLR1H
ENSG00000066382.16	6.27686	2.34416	0.788708	2.97215	0.00295721	0.999872	ENSG00000066382	MPPED2
ENSG00000066405.13	1.19496	-0.584749	1.81569	-0.322053	0.747412	0.999872	ENSG00000066405	CLDN18
ENSG00000066422.5	0.305236	0.459955	3.07622	0.149519	0.881144	0.999872	ENSG00000066422	ZBTB11
ENSG00000066427.24	169.491	0.320059	0.160166	1.9983	0.0456843	0.999872	ENSG00000066427	ATXN3
ENSG00000066468.23	62.3279	0.368741	0.364591	1.01138	0.311834	0.999872	ENSG00000066468	FGFR2
ENSG00000066629.18	8.24489	-0.875606	0.632403	-1.38457	0.166184	0.999872	ENSG00000066629	EML1
ENSG00000066651.20	34.9588	0.393478	0.400805	0.981721	0.326237	0.999872	ENSG00000066651	TRMT11
ENSG00000066654.14	220.353	-0.113763	0.164537	-0.691412	0.489306	0.999872	ENSG00000066654	THUMPD1
ENSG00000066697.15	205.307	-0.16106	0.151294	-1.06455	0.287079	0.999872	ENSG00000066697	MSANTD3
ENSG00000066735.14	24.641	0.0468534	0.390553	0.119967	0.90451	0.999872	ENSG00000066735	KIF26A
ENSG00000066777.9	23.0271	0.374217	0.636747	0.587702	0.556732	0.999872	ENSG00000066777	ARFGEF1
ENSG00000066813.14	362.445	0.0104426	0.209723	0.0497924	0.960288	0.999872	ENSG00000066813	ACSM2B
ENSG00000066827.16	19.907	0.379733	0.385304	0.985542	0.324358	0.999872	ENSG00000066827	ZFAT
ENSG00000066855.16	95.5753	-0.011396	0.173847	-0.0655518	0.947735	0.999872	ENSG00000066855	MTFR1
ENSG00000066923.17	10.908	0.925528	0.61688	1.50034	0.133527	0.999872	ENSG00000066923	STAG3
ENSG00000066926.12	0.0661481	0.260191	3.11135	0.0836263	0.933354	0.999872	ENSG00000066926	FECH
ENSG00000066933.16	20.0575	0.168373	0.54573	0.308528	0.75768	0.999872	ENSG00000066933	MYO9A
ENSG00000067048.17	0.0427955	-0.630994	3.11466	-0.202589	0.839457	0.999872	ENSG00000067048	DDX3Y
ENSG00000067057.18	1.29008	1.04644	3.03632	0.344641	0.730364	0.999872	ENSG00000067057	PFKP
ENSG00000067064.11	289.289	-0.053154	0.154268	-0.344556	0.730428	0.999872	ENSG00000067064	IDI1
ENSG00000067066.17	390.873	-0.0515795	0.13472	-0.382866	0.701819	0.999872	ENSG00000067066	SP100
ENSG00000067082.15	2072.71	-0.0344557	0.0724675	-0.475464	0.634456	0.999872	ENSG00000067082	KLF6
ENSG00000067113.17	95.7796	-0.075182	0.209421	-0.358998	0.719596	0.999872	ENSG00000067113	PLPP1
ENSG00000067141.17	1.27092	0.553294	3.03753	0.182153	0.855463	0.999872	ENSG00000067141	NEO1
ENSG00000067167.8	0.335621	-0.267686	3.08015	-0.086907	0.930745	0.999872	ENSG00000067167	TRAM1
ENSG00000067177.15	6.21947	3.72459	2.26063	1.64759	0.099436	0.999872	ENSG00000067177	PHKA1
ENSG00000067182.8	830.974	-0.0657858	0.0792925	-0.82966	0.406731	0.999872	ENSG00000067182	TNFRSF1A
ENSG00000067191.16	19.8508	0.079284	0.420756	0.188432	0.850538	0.999872	ENSG00000067191	CACNB1
ENSG00000067208.14	176.835	-0.0251984	0.287028	-0.0877906	0.930043	0.999872	ENSG00000067208	EVI5
ENSG00000067221.14	10.3673	0.381536	0.810944	0.470484	0.638009	0.999872	ENSG00000067221	STOML1
ENSG00000067225.18	4847.65	-0.0938733	0.100157	-0.937263	0.348623	0.999872	ENSG00000067225	PKM
ENSG00000067248.10	0.464487	-0.588944	3.07166	-0.191734	0.84795	0.999872	ENSG00000067248	DHX29
ENSG00000067334.14	29.1883	0.182678	0.604247	0.302323	0.762406	0.999872	ENSG00000067334	DNTTIP2
ENSG00000067365.15	12.1149	0.187666	0.52066	0.360438	0.718519	0.999872	ENSG00000067365	METTL22
ENSG00000067369.14	11.2221	-0.500012	0.650521	-0.768634	0.442111	0.999872	ENSG00000067369	TP53BP1
ENSG00000067445.21	40.2435	0.0895953	0.331699	0.27011	0.787076	0.999872	ENSG00000067445	TRO
ENSG00000067533.6	23.306	-0.378824	0.436015	-0.868832	0.384939	0.999872	ENSG00000067533	RRP15
ENSG00000067560.13	0.271423	-1.43503	3.09479	-0.463693	0.642868	0.999872	ENSG00000067560	RHOA
ENSG00000067596.12	59.7004	-0.432842	0.360286	-1.20138	0.229602	0.999872	ENSG00000067596	DHX8
ENSG00000067606.17	8.33682	1.41423	0.781089	1.81059	0.0702046	0.999872	ENSG00000067606	PRKCZ
ENSG00000067646.12	13.3022	-0.366525	0.770682	-0.475585	0.63437	0.999872	ENSG00000067646	ZFY
ENSG00000067704.10	0.0371729	0.287751	3.11438	0.0923943	0.926385	0.999872	ENSG00000067704	IARS2
ENSG00000067715.14	10.1954	-0.719087	0.908784	-0.791263	0.428791	0.999872	ENSG00000067715	SYT1
ENSG00000067798.16	38.2385	0.564444	0.459347	1.2288	0.219147	0.999872	ENSG00000067798	NAV3
ENSG00000067829.19	122.557	0.0769309	0.180851	0.425381	0.670559	0.999872	ENSG00000067829	IDH3G
ENSG00000067836.13	53.0369	0.2317	0.584999	0.396068	0.692055	0.999872	ENSG00000067836	ROGDI
ENSG00000067840.12	5.23689	0.406979	0.810379	0.502209	0.615521	0.999872	ENSG00000067840	PDZD4
ENSG00000067842.17	0.370235	-0.968748	3.09	-0.313511	0.753893	0.999872	ENSG00000067842	ATP2B3
ENSG00000067900.8	98.1255	0.305544	0.245648	1.24383	0.213561	0.999872	ENSG00000067900	ROCK1
ENSG00000067955.15	4.34442	-1.07336	1.07762	-0.99605	0.319226	0.999872	ENSG00000067955	CBFB
ENSG00000067992.16	54.3056	0.0686513	0.318417	0.215602	0.829298	0.999872	ENSG00000067992	PDK3
ENSG00000068001.14	385.984	-0.301628	0.117239	-2.57276	0.0100892	0.999872	ENSG00000068001	HYAL2
ENSG00000068024.17	63.0331	-0.419439	0.325666	-1.28794	0.197766	0.999872	ENSG00000068024	HDAC4
ENSG00000068028.17	342.616	0.0696397	0.106585	0.653372	0.513517	0.999872	ENSG00000068028	RASSF1
ENSG00000068079.8	26.8296	0.125819	0.34167	0.368246	0.71269	0.999872	ENSG00000068079	IFI35
ENSG00000068097.15	1.2689	1.00997	1.81047	0.557846	0.576949	0.999872	ENSG00000068097	HEATR6
ENSG00000068120.15	210.399	0.145098	0.144098	1.00694	0.313963	0.999872	ENSG00000068120	COASY
ENSG00000068137.15	168.7	0.0784257	0.174342	0.449839	0.652826	0.999872	ENSG00000068137	PLEKHH3
ENSG00000068305.17	123.044	-0.222517	0.294248	-0.756222	0.449516	0.999872	ENSG00000068305	MEF2A
ENSG00000068308.14	220.587	-0.110752	0.134039	-0.82627	0.408651	0.999872	ENSG00000068308	OTUD5
ENSG00000068323.17	142.478	-0.0229289	0.157619	-0.145471	0.884339	0.999872	ENSG00000068323	TFE3
ENSG00000068366.20	423.507	0.20742	0.127938	1.62125	0.104964	0.999872	ENSG00000068366	ACSL4
ENSG00000068383.19	6.42408	0.393326	0.690479	0.569642	0.568921	0.999872	ENSG00000068383	INPP5A
ENSG00000068400.13	198.225	0.0703721	0.244382	0.287959	0.773378	0.999872	ENSG00000068400	GRIPAP1
ENSG00000068438.15	172.072	-0.0247436	0.144227	-0.17156	0.863784	0.999872	ENSG00000068438	FTSJ1
ENSG00000068489.13	12.2704	0.0505107	0.544869	0.0927024	0.92614	0.999872	ENSG00000068489	PRR11
ENSG00000068615.19	9.89793	0.360626	0.622308	0.579498	0.562253	0.999872	ENSG00000068615	REEP1
ENSG00000068650.18	226.834	-0.0622075	0.163123	-0.381354	0.702941	0.999872	ENSG00000068650	ATP11A
ENSG00000068724.17	50.5469	0.123186	0.320485	0.384375	0.7007	0.999872	ENSG00000068724	TTC7A
ENSG00000068745.15	159.786	-0.0486671	0.149595	-0.325327	0.744934	0.999872	ENSG00000068745	IP6K2
ENSG00000068781.21	2.54299	0.387009	1.55781	0.248431	0.803801	0.999872	ENSG00000068781	STON1-GTF2A1L
ENSG00000068784.13	0.49739	-0.58902	3.06292	-0.192306	0.847502	0.999872	ENSG00000068784	SRBD1
ENSG00000068796.19	0.214863	-1.35393	3.09033	-0.438118	0.661301	0.999872	ENSG00000068796	KIF2A
ENSG00000068831.19	54.5772	-0.412055	0.463718	-0.88859	0.374223	0.999872	ENSG00000068831	RASGRP2
ENSG00000068878.15	47.1558	-0.242779	0.35793	-0.678288	0.497589	0.999872	ENSG00000068878	PSME4
ENSG00000068885.15	2.14786	0.12855	1.88568	0.0681718	0.945649	0.999872	ENSG00000068885	IFT80
ENSG00000068903.20	122.399	0.0010222	0.226355	0.00451593	0.996397	0.999872	ENSG00000068903	SIRT2
ENSG00000068912.14	222.747	-0.0914652	0.172715	-0.529573	0.596408	0.999872	ENSG00000068912	ERLEC1
ENSG00000068971.14	0.0457255	-0.577147	3.10685	-0.185766	0.852628	0.999872	ENSG00000068971	PPP2R5B
ENSG00000068976.14	3.38664	0.707313	1.15751	0.611066	0.541156	0.999872	ENSG00000068976	PYGM
ENSG00000069020.18	300.995	0.0379792	0.250868	0.151391	0.879667	0.999872	ENSG00000069020	MAST4
ENSG00000069122.19	0.117529	0.431319	3.1018	0.139055	0.889407	0.999872	ENSG00000069122	ADGRF5
ENSG00000069188.17	0.36693	-0.155513	3.07339	-0.0506	0.959644	0.999872	ENSG00000069188	SDK2
ENSG00000069248.12	0.0828984	-0.106105	3.10802	-0.034139	0.972766	0.999872	ENSG00000069248	NUP133
ENSG00000069275.13	3.7929	-0.154177	0.867826	-0.177658	0.858991	0.999872	ENSG00000069275	NUCKS1
ENSG00000069329.18	359.026	-0.013209	0.119365	-0.110661	0.911885	0.999872	ENSG00000069329	VPS35
ENSG00000069399.15	31.9773	-0.489774	0.41934	-1.16796	0.242821	0.999872	ENSG00000069399	BCL3
ENSG00000069424.15	0.532697	-1.09173	2.69277	-0.405432	0.68516	0.999872	ENSG00000069424	KCNAB2
ENSG00000069431.11	162.871	0.192962	0.184414	1.04635	0.295399	0.999872	ENSG00000069431	ABCC9
ENSG00000069493.15	1.17498	-0.868251	3.055	-0.284207	0.776252	0.999872	ENSG00000069493	CLEC2D
ENSG00000069667.16	32.1683	-0.606038	0.298324	-2.03148	0.0422067	0.999872	ENSG00000069667	RORA
ENSG00000069702.11	165.822	0.133629	0.198109	0.674523	0.499979	0.999872	ENSG00000069702	TGFBR3
ENSG00000069812.11	21.971	-0.10207	0.482235	-0.211659	0.832373	0.999872	ENSG00000069812	HES2
ENSG00000069849.11	618.938	-0.0031004	0.0867148	-0.035754	0.971479	0.999872	ENSG00000069849	ATP1B3
ENSG00000069869.16	55.3695	-0.229608	0.489343	-0.469218	0.638914	0.999872	ENSG00000069869	NEDD4
ENSG00000069943.10	20.146	-0.0450081	0.411815	-0.109292	0.912971	0.999872	ENSG00000069943	PIGB
ENSG00000069956.12	7.92429	0.0952261	0.927816	0.102635	0.918253	0.999872	ENSG00000069956	MAPK6
ENSG00000069966.19	49.9347	-0.00111088	0.294322	-0.00377435	0.996989	0.999872	ENSG00000069966	GNB5
ENSG00000069974.16	195.76	-0.10996	0.135753	-0.81	0.41794	0.999872	ENSG00000069974	RAB27A
ENSG00000069998.12	135.355	-0.108429	0.191303	-0.566791	0.570856	0.999872	ENSG00000069998	HDHD5
ENSG00000070010.19	20.9179	-0.539421	0.418864	-1.28782	0.197809	0.999872	ENSG00000070010	UFD1
ENSG00000070018.9	1.22038	-0.232176	2.16894	-0.107046	0.914753	0.999872	ENSG00000070018	LRP6
ENSG00000070081.17	89.5899	1.02121	0.396352	2.57651	0.00998022	0.999872	ENSG00000070081	NUCB2
ENSG00000070087.14	265.169	0.099082	0.204083	0.485499	0.627322	0.999872	ENSG00000070087	PFN2
ENSG00000070159.14	118.577	-0.470921	0.34458	-1.36665	0.171735	0.999872	ENSG00000070159	PTPN3
ENSG00000070182.21	2.60079	0.330804	1.5522	0.21312	0.831233	0.999872	ENSG00000070182	SPTB
ENSG00000070190.13	16.2572	0.0826773	0.488977	0.169082	0.865732	0.999872	ENSG00000070190	DAPP1
ENSG00000070214.16	731.991	-0.0355077	0.109282	-0.324917	0.745244	0.999872	ENSG00000070214	SLC44A1
ENSG00000070269.14	48.4333	-0.0853971	0.285755	-0.298848	0.765056	0.999872	ENSG00000070269	TMEM260
ENSG00000070366.14	23.2928	0.981782	0.500339	1.96223	0.0497355	0.999872	ENSG00000070366	SMG6
ENSG00000070367.16	158.468	-0.0898894	0.168316	-0.534052	0.593306	0.999872	ENSG00000070367	EXOC5
ENSG00000070371.16	7.59124	0.0172386	0.714227	0.0241361	0.980744	0.999872	ENSG00000070371	CLTCL1
ENSG00000070388.11	2.67517	0.158983	1.3586	0.11702	0.906844	0.999872	ENSG00000070388	FGF22
ENSG00000070404.10	0.84421	-1.42662	3.07553	-0.463863	0.642746	0.999872	ENSG00000070404	FSTL3
ENSG00000070413.20	464.732	-0.0298082	0.147924	-0.20151	0.8403	0.999872	ENSG00000070413	DGCR2
ENSG00000070423.18	676.047	-0.0443717	0.11594	-0.382713	0.701933	0.999872	ENSG00000070423	RNF126
ENSG00000070444.15	25.5007	0.17976	0.381064	0.471732	0.637118	0.999872	ENSG00000070444	MNT
ENSG00000070476.15	9.20004	0.304166	0.599633	0.507253	0.611978	0.999872	ENSG00000070476	ZXDC
ENSG00000070495.15	142.113	0.0691672	0.229514	0.301363	0.763137	0.999872	ENSG00000070495	JMJD6
ENSG00000070501.12	67.1697	-0.132687	0.260188	-0.509967	0.610075	0.999872	ENSG00000070501	POLB
ENSG00000070526.15	0.12047	-0.134985	3.1126	-0.0433673	0.965409	0.999872	ENSG00000070526	ST6GALNAC1
ENSG00000070540.13	21.0895	-0.273256	0.406171	-0.67276	0.5011	0.999872	ENSG00000070540	WIPI1
ENSG00000070601.10	5.98754	1.35708	0.896917	1.51305	0.130268	0.999872	ENSG00000070601	FRMPD1
ENSG00000070610.14	236.978	0.00546373	0.181306	0.0301354	0.975959	0.999872	ENSG00000070610	GBA2
ENSG00000070614.15	0.654487	0.713513	3.07436	0.232085	0.816472	0.999872	ENSG00000070614	NDST1
ENSG00000070669.17	11.9295	-0.144906	0.584728	-0.247817	0.804276	0.999872	ENSG00000070669	ASNS
ENSG00000070718.12	96.0724	-1.05539	0.847011	-1.24602	0.212757	0.999872	ENSG00000070718	AP3M2
ENSG00000070756.17	2231.21	-0.0313284	0.118696	-0.263939	0.791827	0.999872	ENSG00000070756	PABPC1
ENSG00000070759.17	7.13013	2.31546	1.01736	2.27594	0.0228495	0.999872	ENSG00000070759	TESK2
ENSG00000070770.10	9.50111	-1.96473	3.00296	-0.654265	0.512941	0.999872	ENSG00000070770	CSNK2A2
ENSG00000070778.13	63.749	-0.238325	0.271715	-0.877114	0.380425	0.999872	ENSG00000070778	PTPN21
ENSG00000070785.17	35.9203	-0.34104	0.412072	-0.827623	0.407884	0.999872	ENSG00000070785	EIF2B3
ENSG00000070808.16	2.32267	-0.04835	1.18536	-0.0407892	0.967464	0.999872	ENSG00000070808	CAMK2A
ENSG00000070814.22	330.586	0.12845	0.14739	0.871498	0.383482	0.999872	ENSG00000070814	TCOF1
ENSG00000070831.17	1995.05	-0.0963209	0.0948778	-1.01521	0.310006	0.999872	ENSG00000070831	CDC42
ENSG00000070882.13	1.70393	1.90022	2.70142	0.703414	0.481798	0.999872	ENSG00000070882	OSBPL3
ENSG00000070915.10	3.66784	-1.2577	1.02811	-1.22331	0.221213	0.999872	ENSG00000070915	SLC12A3
ENSG00000070950.10	0.0668953	-0.63031	3.11459	-0.202374	0.839625	0.999872	ENSG00000070950	RAD18
ENSG00000070961.16	185.486	-0.00462447	0.18813	-0.0245813	0.980389	0.999872	ENSG00000070961	ATP2B1
ENSG00000070985.13	0.213989	0.262024	3.10001	0.0845237	0.93264	0.999872	ENSG00000070985	TRPM5
ENSG00000071051.14	248.744	0.00779928	0.141108	0.0552718	0.955922	0.999872	ENSG00000071051	NCK2
ENSG00000071054.16	2619.92	-0.0981537	0.061973	-1.58381	0.113236	0.999872	ENSG00000071054	MAP4K4
ENSG00000071073.13	32.9549	0.813273	0.34738	2.34116	0.019224	0.999872	ENSG00000071073	MGAT4A
ENSG00000071082.11	3374.3	0.0269443	0.131217	0.205342	0.837305	0.999872	ENSG00000071082	RPL31
ENSG00000071127.17	891.443	-0.0681184	0.0992384	-0.686412	0.492453	0.999872	ENSG00000071127	WDR1
ENSG00000071189.21	82.128	-0.133912	0.223521	-0.599104	0.549103	0.999872	ENSG00000071189	SNX13
ENSG00000071205.12	0.170751	0.0557455	3.10317	0.017964	0.985668	0.999872	ENSG00000071205	ARHGAP10
ENSG00000071242.12	0.743692	0.862112	3.08018	0.279891	0.779561	0.999872	ENSG00000071242	RPS6KA2
ENSG00000071243.16	19.7931	0.372315	0.3985	0.934291	0.350154	0.999872	ENSG00000071243	ING3
ENSG00000071246.11	10.6573	0.365998	0.55802	0.655887	0.511897	0.999872	ENSG00000071246	VASH1
ENSG00000071282.12	0.296888	0.51655	3.09449	0.166926	0.867429	0.999872	ENSG00000071282	LMCD1
ENSG00000071462.12	4.23815	0.231226	1.05582	0.219001	0.82665	0.999872	ENSG00000071462	BUD23
ENSG00000071537.14	7.37449	-1.52002	0.74173	-2.04929	0.040434	0.999872	ENSG00000071537	SEL1L
ENSG00000071539.14	0.0427955	-0.630994	3.11466	-0.202589	0.839457	0.999872	ENSG00000071539	TRIP13
ENSG00000071553.18	0.088521	-1.02186	3.10195	-0.329425	0.741835	0.999872	ENSG00000071553	ATP6AP1
ENSG00000071564.17	231.704	-0.0989803	0.171955	-0.575618	0.564873	0.999872	ENSG00000071564	TCF3
ENSG00000071575.11	282.497	-0.117998	0.160402	-0.735643	0.461948	0.999872	ENSG00000071575	TRIB2
ENSG00000071626.17	866.024	0.399434	0.504683	0.791455	0.428679	0.999872	ENSG00000071626	DAZAP1
ENSG00000071655.18	219.541	-0.0142754	0.141306	-0.101025	0.919531	0.999872	ENSG00000071655	MBD3
ENSG00000071794.16	17.6413	2.51117	1.11403	2.25414	0.0241871	0.999872	ENSG00000071794	HLTF
ENSG00000071859.15	73.8134	-0.0571466	0.487329	-0.117265	0.90665	0.999872	ENSG00000071859	FAM50A
ENSG00000071889.17	138.642	-0.0342123	0.153819	-0.22242	0.823987	0.999872	ENSG00000071889	FAM3A
ENSG00000071894.17	179.237	-0.0283014	0.16017	-0.176695	0.859748	0.999872	ENSG00000071894	CPSF1
ENSG00000071909.19	2.20649	-1.44233	1.54545	-0.933277	0.350677	0.999872	ENSG00000071909	MYO3B
ENSG00000071967.12	0.946101	0.218462	3.05948	0.0714047	0.943076	0.999872	ENSG00000071967	CYBRD1
ENSG00000071991.9	8.03553	-0.388413	0.856098	-0.453701	0.650044	0.999872	ENSG00000071991	CDH19
ENSG00000071994.11	117.058	-0.113036	0.223156	-0.506533	0.612483	0.999872	ENSG00000071994	PDCD2
ENSG00000072041.17	0.386142	-0.778355	3.08257	-0.252502	0.800653	0.999872	ENSG00000072041	SLC6A15
ENSG00000072042.13	13.6382	-0.0304091	0.487789	-0.0623407	0.950291	0.999872	ENSG00000072042	RDH11
ENSG00000072062.15	11.7119	-0.102645	0.511596	-0.200636	0.840983	0.999872	ENSG00000072062	PRKACA
ENSG00000072071.16	86.4757	-0.117434	0.25201	-0.465989	0.641223	0.999872	ENSG00000072071	ADGRL1
ENSG00000072080.11	10.7868	0.0414242	0.787789	0.0525829	0.958064	0.999872	ENSG00000072080	SPP2
ENSG00000072110.15	1874.4	-0.120819	0.0791793	-1.52589	0.127038	0.999872	ENSG00000072110	ACTN1
ENSG00000072121.17	14.6688	0.188664	0.501066	0.376525	0.706527	0.999872	ENSG00000072121	ZFYVE26
ENSG00000072133.11	15.5086	0.140327	0.437857	0.320487	0.7486	0.999872	ENSG00000072133	RPS6KA6
ENSG00000072134.15	171.315	0.299824	0.223352	1.34238	0.179472	0.999872	ENSG00000072134	EPN2
ENSG00000072135.13	6.03922	-0.0762671	0.831932	-0.0916747	0.926957	0.999872	ENSG00000072135	PTPN18
ENSG00000072163.20	53.811	-0.146814	0.30171	-0.486606	0.626537	0.999872	ENSG00000072163	LIMS2
ENSG00000072182.13	0.67973	-0.871677	3.05181	-0.285626	0.775165	0.999872	ENSG00000072182	ASIC4
ENSG00000072195.15	12.6727	-0.324211	0.584058	-0.555101	0.578825	0.999872	ENSG00000072195	SPEG
ENSG00000072201.14	32.3163	-0.859534	0.527837	-1.62841	0.103439	0.999872	ENSG00000072201	LNX1
ENSG00000072210.19	229.196	-0.100095	0.19206	-0.521167	0.602251	0.999872	ENSG00000072210	ALDH3A2
ENSG00000072274.13	285.707	0.167664	0.175798	0.953734	0.340218	0.999872	ENSG00000072274	TFRC
ENSG00000072310.17	402.261	-0.11422	0.103504	-1.10353	0.269796	0.999872	ENSG00000072310	SREBF1
ENSG00000072315.3	0.294162	-0.696143	3.09011	-0.225281	0.821761	0.999872	ENSG00000072315	TRPC5
ENSG00000072364.13	78.9551	-0.0535224	0.191709	-0.279186	0.780102	0.999872	ENSG00000072364	AFF4
ENSG00000072401.15	14.8553	0.0887765	3.07449	0.0288752	0.976964	0.999872	ENSG00000072401	UBE2D1
ENSG00000072415.10	133.38	-0.29796	0.279615	-1.06561	0.286601	0.999872	ENSG00000072415	PALS1
ENSG00000072422.17	61.9657	0.612291	0.486686	1.25808	0.208363	0.999872	ENSG00000072422	RHOBTB1
ENSG00000072501.19	2.57267	0.646467	1.82619	0.353998	0.72334	0.999872	ENSG00000072501	SMC1A
ENSG00000072506.13	296.372	0.155501	0.163524	0.950937	0.341636	0.999872	ENSG00000072506	HSD17B10
ENSG00000072518.21	1.88329	-0.224023	1.22171	-0.183369	0.854509	0.999872	ENSG00000072518	MARK2
ENSG00000072571.20	1.33903	-1.97539	3.02285	-0.653485	0.513444	0.999872	ENSG00000072571	HMMR
ENSG00000072609.18	166.897	-0.151516	0.19432	-0.779724	0.435553	0.999872	ENSG00000072609	CHFR
ENSG00000072682.19	389.456	0.0533008	0.132685	0.401709	0.687899	0.999872	ENSG00000072682	P4HA2
ENSG00000072694.21	102.137	-0.132	0.17617	-0.749278	0.45369	0.999872	ENSG00000072694	FCGR2B
ENSG00000072736.19	14.5916	0.975613	0.605075	1.61238	0.106879	0.999872	ENSG00000072736	NFATC3
ENSG00000072756.17	51.6893	0.146291	0.381042	0.383923	0.701036	0.999872	ENSG00000072756	TRNT1
ENSG00000072778.20	1207.57	0.0310764	0.111557	0.278569	0.780575	0.999872	ENSG00000072778	ACADVL
ENSG00000072786.13	116.147	0.0443726	0.177083	0.250575	0.802142	0.999872	ENSG00000072786	STK10
ENSG00000072803.17	160.649	-0.205132	0.260699	-0.786854	0.431368	0.999872	ENSG00000072803	FBXW11
ENSG00000072818.12	85.4623	0.369876	0.24973	1.4811	0.138579	0.999872	ENSG00000072818	ACAP1
ENSG00000072832.15	0.558173	0.080283	3.09518	0.0259381	0.979307	0.999872	ENSG00000072832	CRMP1
ENSG00000072840.13	0.916799	0.299216	1.979	0.151195	0.879822	0.999872	ENSG00000072840	EVC
ENSG00000072849.11	1.38277	-0.707533	3.05953	-0.231256	0.817116	0.999872	ENSG00000072849	DERL2
ENSG00000072858.11	0.0668953	-0.63031	3.11459	-0.202374	0.839625	0.999872	ENSG00000072858	SIDT1
ENSG00000072864.16	0.163255	-0.0456669	3.09002	-0.0147788	0.988209	0.999872	ENSG00000072864	NDE1
ENSG00000072952.19	31.2407	0.276802	0.347088	0.7975	0.425161	0.999872	ENSG00000072952	IRAG1
ENSG00000072958.9	3.0133	-1.08319	1.40331	-0.771881	0.440185	0.999872	ENSG00000072958	AP1M1
ENSG00000073008.15	225.035	0.12642	0.146899	0.86059	0.389464	0.999872	ENSG00000073008	PVR
ENSG00000073060.16	449.147	-0.0854542	0.139735	-0.611544	0.54084	0.999872	ENSG00000073060	SCARB1
ENSG00000073146.16	2.13294	0.755259	1.49015	0.506835	0.612271	0.999872	ENSG00000073146	MOV10L1
ENSG00000073150.14	0.284292	0.123024	3.08928	0.0398229	0.968234	0.999872	ENSG00000073150	PANX2
ENSG00000073169.14	312.659	0.0975068	0.172807	0.564252	0.572582	0.999872	ENSG00000073169	SELENOO
ENSG00000073331.18	40.105	0.0777476	0.346814	0.224177	0.82262	0.999872	ENSG00000073331	ALPK1
ENSG00000073350.14	438.728	-0.0299707	0.168478	-0.177891	0.858809	0.999872	ENSG00000073350	LLGL2
ENSG00000073417.15	157.133	-0.889774	0.48983	-1.81649	0.0692945	0.999872	ENSG00000073417	PDE8A
ENSG00000073536.18	57.185	-0.521641	0.288847	-1.80594	0.0709273	0.999872	ENSG00000073536	NLE1
ENSG00000073578.17	62.2107	0.734483	0.488557	1.50337	0.132743	0.999872	ENSG00000073578	SDHA
ENSG00000073584.20	311.852	0.0439833	0.121611	0.361673	0.717596	0.999872	ENSG00000073584	SMARCE1
ENSG00000073605.18	97.2385	0.175096	0.270491	0.647327	0.51742	0.999872	ENSG00000073605	GSDMB
ENSG00000073614.13	1.23533	1.05839	2.60704	0.405976	0.68476	0.999872	ENSG00000073614	KDM5A
ENSG00000073670.14	0.132296	0.466219	3.10577	0.150114	0.880675	0.999872	ENSG00000073670	ADAM11
ENSG00000073711.11	1.93078	-2.00747	2.00058	-1.00345	0.315646	0.999872	ENSG00000073711	PPP2R3A
ENSG00000073712.15	439.937	-0.0867769	0.119211	-0.727925	0.466659	0.999872	ENSG00000073712	FERMT2
ENSG00000073734.10	1.13265	-0.81953	3.035	-0.270027	0.78714	0.999872	ENSG00000073734	ABCB11
ENSG00000073737.17	42.9088	-0.485568	0.345458	-1.40558	0.159849	0.999872	ENSG00000073737	DHRS9
ENSG00000073792.16	12.2309	0.416839	0.49171	0.847734	0.396586	0.999872	ENSG00000073792	IGF2BP2
ENSG00000073803.14	586.52	0.000237047	0.0891092	0.00266018	0.997877	0.999872	ENSG00000073803	MAP3K13
ENSG00000073849.16	947.235	0.125088	0.130269	0.960233	0.336938	0.999872	ENSG00000073849	ST6GAL1
ENSG00000073910.22	40.694	-0.160647	0.4241	-0.378795	0.70484	0.999872	ENSG00000073910	FRY
ENSG00000073921.18	550.415	0.0378295	0.104897	0.360635	0.718372	0.999872	ENSG00000073921	PICALM
ENSG00000073969.18	132.806	0.0394514	0.18899	0.208749	0.834644	0.999872	ENSG00000073969	NSF
ENSG00000074054.20	7.21346	0.71884	1.43416	0.501228	0.616211	0.999872	ENSG00000074054	CLASP1
ENSG00000074071.15	24.3855	-2.1336	2.14118	-0.996459	0.319027	0.999872	ENSG00000074071	MRPS34
ENSG00000074181.9	0.460946	-0.330575	3.07243	-0.107594	0.914318	0.999872	ENSG00000074181	NOTCH3
ENSG00000074201.9	12.2456	0.230269	0.506616	0.454523	0.649452	0.999872	ENSG00000074201	CLNS1A
ENSG00000074211.14	7.07631	-0.383209	0.683704	-0.560489	0.575146	0.999872	ENSG00000074211	PPP2R2C
ENSG00000074219.14	1.66995	1.57287	1.39095	1.13078	0.258146	0.999872	ENSG00000074219	TEAD2
ENSG00000074266.22	171.628	0.0931028	0.171239	0.543702	0.586647	0.999872	ENSG00000074266	EED
ENSG00000074276.10	107.828	0.0239836	0.232786	0.103029	0.91794	0.999872	ENSG00000074276	CDHR2
ENSG00000074317.11	0.709554	0.379725	3.05959	0.12411	0.901228	0.999872	ENSG00000074317	SNCB
ENSG00000074319.13	24.459	0.953979	0.677573	1.40793	0.159151	0.999872	ENSG00000074319	TSG101
ENSG00000074356.17	60.8235	0.326548	0.251403	1.2989	0.193979	0.999872	ENSG00000074356	NCBP3
ENSG00000074370.18	13.2495	-0.640149	0.610585	-1.04842	0.294446	0.999872	ENSG00000074370	ATP2A3
ENSG00000074416.14	1069.71	-0.042701	0.165325	-0.258285	0.796187	0.999872	ENSG00000074416	MGLL
ENSG00000074527.13	57.4874	-0.397263	0.274498	-1.44724	0.147831	0.999872	ENSG00000074527	NTN4
ENSG00000074582.15	118.532	0.108035	0.183594	0.588449	0.556231	0.999872	ENSG00000074582	BCS1L
ENSG00000074590.13	66.3144	0.0715183	0.234784	0.304612	0.760661	0.999872	ENSG00000074590	NUAK1
ENSG00000074603.19	217.941	-0.43832	0.199269	-2.19964	0.0278325	0.999872	ENSG00000074603	DPP8
ENSG00000074621.14	25.5026	-0.0627158	0.443942	-0.14127	0.887656	0.999872	ENSG00000074621	SLC24A1
ENSG00000074657.14	80.4468	-0.315027	0.302952	-1.03986	0.298407	0.999872	ENSG00000074657	ZNF532
ENSG00000074695.6	8.28705	0.941931	1.10713	0.850789	0.394887	0.999872	ENSG00000074695	LMAN1
ENSG00000074696.13	1.43404	-1.54968	1.91317	-0.810009	0.417935	0.999872	ENSG00000074696	HACD3
ENSG00000074706.13	17.2776	0.890526	0.730834	1.21851	0.223031	0.999872	ENSG00000074706	IPCEF1
ENSG00000074755.15	25.0789	-0.14875	0.340708	-0.436592	0.662407	0.999872	ENSG00000074755	ZZEF1
ENSG00000074800.16	14319.3	0.130275	0.101723	1.28068	0.200308	0.999872	ENSG00000074800	ENO1
ENSG00000074842.8	0.238583	-0.7625	3.10298	-0.245732	0.80589	0.999872	ENSG00000074842	MYDGF
ENSG00000074935.14	27.5817	0.898318	0.759656	1.18253	0.236994	0.999872	ENSG00000074935	TUBE1
ENSG00000074964.17	109.06	0.288525	0.20461	1.41012	0.158504	0.999872	ENSG00000074964	ARHGEF10L
ENSG00000074966.11	2.83232	0.0957638	1.23806	0.0773496	0.938345	0.999872	ENSG00000074966	TXK
ENSG00000075035.10	0.133791	-0.766787	3.10143	-0.247237	0.804725	0.999872	ENSG00000075035	WSCD2
ENSG00000075043.19	0.170751	0.0557455	3.10317	0.017964	0.985668	0.999872	ENSG00000075043	KCNQ2
ENSG00000075073.15	2.81183	-0.5963	1.33195	-0.44769	0.654377	0.999872	ENSG00000075073	TACR2
ENSG00000075089.9	42.6869	-0.308097	0.275	-1.12035	0.262563	0.999872	ENSG00000075089	ACTR6
ENSG00000075131.10	15.9432	-0.629149	0.542171	-1.16043	0.245875	0.999872	ENSG00000075131	TIPIN
ENSG00000075142.14	364.017	0.07254	0.127769	0.567745	0.570208	0.999872	ENSG00000075142	SRI
ENSG00000075151.21	148.621	-0.156955	0.174708	-0.898386	0.36898	0.999872	ENSG00000075151	EIF4G3
ENSG00000075223.14	0.545044	-0.239551	2.27332	-0.105375	0.916078	0.999872	ENSG00000075223	SEMA3C
ENSG00000075234.17	10.5221	-0.0414594	0.717454	-0.0577869	0.953918	0.999872	ENSG00000075234	TTC38
ENSG00000075239.14	27.9004	0.391418	0.427156	0.916336	0.359491	0.999872	ENSG00000075239	ACAT1
ENSG00000075240.17	135.753	-0.343532	0.22088	-1.55529	0.119878	0.999872	ENSG00000075240	GRAMD4
ENSG00000075275.18	0.262201	-0.327616	3.09389	-0.105891	0.915669	0.999872	ENSG00000075275	CELSR1
ENSG00000075292.19	173.449	-0.106674	0.17514	-0.609081	0.54247	0.999872	ENSG00000075292	ZNF638
ENSG00000075336.12	29.4872	-0.368968	0.427309	-0.863469	0.38788	0.999872	ENSG00000075336	TIMM21
ENSG00000075340.23	0.204908	0.929112	3.08562	0.30111	0.763331	0.999872	ENSG00000075340	ADD2
ENSG00000075391.17	172.5	0.0418797	0.196688	0.212925	0.831386	0.999872	ENSG00000075391	RASAL2
ENSG00000075399.14	17.7242	-3.17286	1.17257	-2.7059	0.00681202	0.999872	ENSG00000075399	VPS9D1
ENSG00000075407.18	228.918	-0.0211592	0.174239	-0.121438	0.903344	0.999872	ENSG00000075407	ZNF37A
ENSG00000075413.19	277.433	-0.0354538	0.124204	-0.285449	0.7753	0.999872	ENSG00000075413	MARK3
ENSG00000075415.13	966.65	0.0369998	0.0904481	0.409072	0.682487	0.999872	ENSG00000075415	SLC25A3
ENSG00000075420.13	516.499	0.039089	0.109125	0.358202	0.720192	0.999872	ENSG00000075420	FNDC3B
ENSG00000075426.12	281.455	-0.210687	0.229897	-0.916439	0.359437	0.999872	ENSG00000075426	FOSL2
ENSG00000075539.15	63.3967	0.510121	0.322494	1.5818	0.113695	0.999872	ENSG00000075539	FRYL
ENSG00000075568.17	161.835	-0.0840702	0.257311	-0.326726	0.743875	0.999872	ENSG00000075568	TMEM131
ENSG00000075618.18	1316.39	0.0382406	0.137868	0.277371	0.781495	0.999872	ENSG00000075618	FSCN1
ENSG00000075624.17	13251.9	0.0188635	0.0840673	0.224386	0.822457	0.999872	ENSG00000075624	ACTB
ENSG00000075651.16	54.0545	0.0768431	0.36596	0.209977	0.833686	0.999872	ENSG00000075651	PLD1
ENSG00000075673.12	0.0457255	-0.577147	3.10685	-0.185766	0.852628	0.999872	ENSG00000075673	ATP12A
ENSG00000075702.18	4.87855	-0.688197	1.13594	-0.605838	0.544622	0.999872	ENSG00000075702	WDR62
ENSG00000075711.21	94.0824	0.0569029	0.273817	0.207814	0.835374	0.999872	ENSG00000075711	DLG1
ENSG00000075790.12	36.3742	-0.855326	0.591881	-1.4451	0.148431	0.999872	ENSG00000075790	BCAP29
ENSG00000075826.17	15.9229	0.588904	1.06897	0.55091	0.581696	0.999872	ENSG00000075826	SEC31B
ENSG00000075856.12	4.1706	-0.707713	0.877001	-0.80697	0.419684	0.999872	ENSG00000075856	SART3
ENSG00000075884.14	13.0182	0.158226	0.507384	0.311848	0.755156	0.999872	ENSG00000075884	ARHGAP15
ENSG00000075914.13	51.3317	0.00277424	0.274923	0.010091	0.991949	0.999872	ENSG00000075914	EXOSC7
ENSG00000075945.13	51.6326	1.77143	0.745827	2.37512	0.0175432	0.999872	ENSG00000075945	KIFAP3
ENSG00000076043.11	790.674	0.11715	0.109081	1.07398	0.282833	0.999872	ENSG00000076043	REXO2
ENSG00000076053.12	12.9177	-1.55672	0.736585	-2.11343	0.0345639	0.999872	ENSG00000076053	RBM7
ENSG00000076067.13	0.484813	-0.237967	3.07723	-0.0773315	0.93836	0.999872	ENSG00000076067	RBMS2
ENSG00000076108.12	440.799	-0.0636036	0.207786	-0.306101	0.759527	0.999872	ENSG00000076108	BAZ2A
ENSG00000076242.16	0.0661481	0.260191	3.11135	0.0836263	0.933354	0.999872	ENSG00000076242	MLH1
ENSG00000076248.11	89.2596	-0.211821	0.203748	-1.03962	0.298515	0.999872	ENSG00000076248	UNG
ENSG00000076258.10	17.7234	-0.0742235	0.473666	-0.1567	0.875481	0.999872	ENSG00000076258	FMO4
ENSG00000076321.11	2.00421	-0.680751	1.63443	-0.416508	0.677039	0.999872	ENSG00000076321	KLHL20
ENSG00000076344.16	4.23772	0.580727	0.911493	0.637116	0.524049	0.999872	ENSG00000076344	RGS11
ENSG00000076351.13	2.70543	-1.01416	1.17177	-0.865495	0.386767	0.999872	ENSG00000076351	SLC46A1
ENSG00000076356.7	121.85	0.0936762	0.212319	0.441205	0.659064	0.999872	ENSG00000076356	PLXNA2
ENSG00000076382.17	11.5393	-0.19689	0.519698	-0.378854	0.704796	0.999872	ENSG00000076382	SPAG5
ENSG00000076513.17	23.6945	0.503882	0.381426	1.32105	0.186486	0.999872	ENSG00000076513	ANKRD13A
ENSG00000076554.15	170.247	-0.38197	0.161141	-2.37041	0.0177683	0.999872	ENSG00000076554	TPD52
ENSG00000076555.15	127.161	-0.416437	0.257656	-1.61625	0.10604	0.999872	ENSG00000076555	ACACB
ENSG00000076641.4	304.437	0.0809323	0.144422	0.560387	0.575215	0.999872	ENSG00000076641	PAG1
ENSG00000076650.7	14.4833	-0.616704	1.11845	-0.551391	0.581366	0.999872	ENSG00000076650	GPATCH1
ENSG00000076662.10	9.64283	0.183697	0.799862	0.22966	0.818356	0.999872	ENSG00000076662	ICAM3
ENSG00000076685.19	7.06611	-0.487412	1.2377	-0.393806	0.693724	0.999872	ENSG00000076685	NT5C2
ENSG00000076706.17	20.1187	0.382806	0.442428	0.86524	0.386907	0.999872	ENSG00000076706	MCAM
ENSG00000076770.14	212.629	0.302297	0.230279	1.31274	0.18927	0.999872	ENSG00000076770	MBNL3
ENSG00000076826.10	111.93	0.176207	0.211725	0.832246	0.40527	0.999872	ENSG00000076826	CAMSAP3
ENSG00000076864.19	117.642	-0.134711	0.210801	-0.639043	0.522795	0.999872	ENSG00000076864	RAP1GAP
ENSG00000076928.18	347.738	-0.202024	0.152353	-1.32603	0.18483	0.999872	ENSG00000076928	ARHGEF1
ENSG00000076944.16	69.5842	-0.134236	0.218713	-0.613756	0.539377	0.999872	ENSG00000076944	STXBP2
ENSG00000076984.18	18.217	0.129683	0.450937	0.287585	0.773665	0.999872	ENSG00000076984	MAP2K7
ENSG00000077044.11	218.05	-0.0805715	0.257398	-0.313023	0.754263	0.999872	ENSG00000077044	DGKD
ENSG00000077063.11	0.872862	-0.440451	3.05204	-0.144314	0.885253	0.999872	ENSG00000077063	CTTNBP2
ENSG00000077092.19	29.9905	0.222319	0.657628	0.338063	0.735316	0.999872	ENSG00000077092	RARB
ENSG00000077097.15	301.975	0.0247334	0.155291	0.159271	0.873455	0.999872	ENSG00000077097	TOP2B
ENSG00000077147.16	9.67681	0.148855	1.10038	0.135276	0.892394	0.999872	ENSG00000077147	TM9SF3
ENSG00000077150.20	33.9234	0.0523872	0.304937	0.171797	0.863597	0.999872	ENSG00000077150	NFKB2
ENSG00000077152.11	37.9923	-0.191488	0.360387	-0.531339	0.595184	0.999872	ENSG00000077152	UBE2T
ENSG00000077157.22	13.4024	-0.153586	0.603688	-0.254413	0.799176	0.999872	ENSG00000077157	PPP1R12B
ENSG00000077232.18	291.572	0.118413	0.141724	0.835517	0.403427	0.999872	ENSG00000077232	DNAJC10
ENSG00000077235.18	191.626	-0.00958258	0.160104	-0.0598524	0.952273	0.999872	ENSG00000077235	GTF3C1
ENSG00000077238.14	478.491	-0.0801231	0.189834	-0.422069	0.672975	0.999872	ENSG00000077238	IL4R
ENSG00000077254.14	134.421	-0.023967	0.277171	-0.0864703	0.931093	0.999872	ENSG00000077254	USP33
ENSG00000077264.15	1.50379	-1.35868	1.41898	-0.957501	0.338314	0.999872	ENSG00000077264	PAK3
ENSG00000077279.19	2.09478	0.368467	1.41138	0.261068	0.79404	0.999872	ENSG00000077279	DCX
ENSG00000077327.16	0.0932958	0.236436	3.10669	0.0761054	0.939335	0.999872	ENSG00000077327	SPAG6
ENSG00000077348.9	83.2738	-0.304076	0.22054	-1.37878	0.167964	0.999872	ENSG00000077348	EXOSC5
ENSG00000077380.16	1498.77	0.0854834	0.142195	0.601172	0.547726	0.999872	ENSG00000077380	DYNC1I2
ENSG00000077454.16	9.79441	-1.2378	0.671171	-1.84424	0.0651477	0.999872	ENSG00000077454	LRCH4
ENSG00000077458.13	0.684078	-1.96122	2.97444	-0.659359	0.509665	0.999872	ENSG00000077458	FAM76B
ENSG00000077463.15	90.7254	-0.0748992	0.230439	-0.325028	0.74516	0.999872	ENSG00000077463	SIRT6
ENSG00000077514.9	4.72666	-1.04061	1.30686	-0.796267	0.425877	0.999872	ENSG00000077514	POLD3
ENSG00000077549.19	1293.18	-0.148759	0.131342	-1.13261	0.257378	0.999872	ENSG00000077549	CAPZB
ENSG00000077585.14	0.892885	-2.10207	3.04842	-0.68956	0.490471	0.999872	ENSG00000077585	GPR137B
ENSG00000077616.11	7.7149	-2.09002	1.31951	-1.58394	0.113207	0.999872	ENSG00000077616	NAALAD2
ENSG00000077684.16	187.047	-0.146556	0.14934	-0.981358	0.326416	0.999872	ENSG00000077684	JADE1
ENSG00000077721.16	243.342	0.0233075	0.143186	0.162778	0.870693	0.999872	ENSG00000077721	UBE2A
ENSG00000077782.21	507.372	-0.0555964	0.143571	-0.38724	0.698578	0.999872	ENSG00000077782	FGFR1
ENSG00000077800.13	0.129524	-0.604481	3.11278	-0.194193	0.846024	0.999872	ENSG00000077800	FKBP6
ENSG00000077935.17	0.397242	-0.443827	3.07518	-0.144325	0.885243	0.999872	ENSG00000077935	SMC1B
ENSG00000077942.19	45.0346	0.248568	0.329666	0.754	0.450849	0.999872	ENSG00000077942	FBLN1
ENSG00000077943.8	0.33653	0.078523	3.07618	0.0255261	0.979635	0.999872	ENSG00000077943	ITGA8
ENSG00000078018.20	133.91	-0.0922255	0.201663	-0.457324	0.647438	0.999872	ENSG00000078018	MAP2
ENSG00000078043.16	32.5866	0.389221	0.537792	0.723739	0.469226	0.999872	ENSG00000078043	PIAS2
ENSG00000078053.17	3.39371	-0.390708	1.00005	-0.390689	0.696027	0.999872	ENSG00000078053	AMPH
ENSG00000078061.13	144.009	0.346786	0.184264	1.88201	0.0598352	0.999872	ENSG00000078061	ARAF
ENSG00000078070.13	5.58143	-0.0996166	1.88481	-0.0528522	0.95785	0.999872	ENSG00000078070	MCCC1
ENSG00000078098.14	27.9435	-0.128385	0.412716	-0.311073	0.755745	0.999872	ENSG00000078098	FAP
ENSG00000078114.19	12.3236	0.53269	0.762444	0.698661	0.484764	0.999872	ENSG00000078114	NEBL
ENSG00000078124.12	1.09056	1.58607	1.92529	0.823811	0.410047	0.999872	ENSG00000078124	ACER3
ENSG00000078140.14	172.624	0.349341	0.291123	1.19998	0.230148	0.999872	ENSG00000078140	UBE2K
ENSG00000078142.13	72.382	-0.364011	0.427245	-0.851995	0.394217	0.999872	ENSG00000078142	PIK3C3
ENSG00000078177.14	1.55026	-1.49012	3.07078	-0.485256	0.627495	0.999872	ENSG00000078177	N4BP2
ENSG00000078246.17	0.507449	-0.641579	2.73606	-0.23449	0.814604	0.999872	ENSG00000078246	TULP3
ENSG00000078269.15	270.387	-0.217695	0.150096	-1.45037	0.146956	0.999872	ENSG00000078269	SYNJ2
ENSG00000078295.17	0.655869	0.717512	3.05097	0.235175	0.814073	0.999872	ENSG00000078295	ADCY2
ENSG00000078304.19	453.392	0.157696	0.11064	1.4253	0.15407	0.999872	ENSG00000078304	PPP2R5C
ENSG00000078369.18	1490.92	-0.0410887	0.0736064	-0.558222	0.576693	0.999872	ENSG00000078369	GNB1
ENSG00000078403.17	64.102	-0.301419	0.520652	-0.578927	0.562639	0.999872	ENSG00000078403	MLLT10
ENSG00000078487.17	31.0887	-0.216202	0.342958	-0.630402	0.528432	0.999872	ENSG00000078487	ZCWPW1
ENSG00000078549.15	3.18461	1.24337	1.16435	1.06786	0.285582	0.999872	ENSG00000078549	ADCYAP1R1
ENSG00000078589.13	0.0914509	-0.758667	3.10333	-0.244469	0.806868	0.999872	ENSG00000078589	P2RY10
ENSG00000078596.11	0.133791	-0.766787	3.10143	-0.247237	0.804725	0.999872	ENSG00000078596	ITM2A
ENSG00000078618.22	207.8	-0.0903774	0.162253	-0.557017	0.577516	0.999872	ENSG00000078618	NRDC
ENSG00000078668.14	0.439812	-0.993213	3.06321	-0.32424	0.745756	0.999872	ENSG00000078668	VDAC3
ENSG00000078674.18	132.361	-0.314201	0.368881	-0.851769	0.394342	0.999872	ENSG00000078674	PCM1
ENSG00000078687.17	176.842	-0.153389	0.159133	-0.963902	0.335095	0.999872	ENSG00000078687	TNRC6C
ENSG00000078699.22	86.5734	0.044719	0.227657	0.196431	0.844272	0.999872	ENSG00000078699	CBFA2T2
ENSG00000078747.16	7.32458	-4.23625	1.43718	-2.9476	0.00320247	0.999872	ENSG00000078747	ITCH
ENSG00000078795.17	1.3034	-0.0265867	2.35465	-0.0112912	0.990991	0.999872	ENSG00000078795	PKD2L2
ENSG00000078804.13	41.8022	-8.69069	2.9806	-2.91575	0.00354838	0.999872	ENSG00000078804	TP53INP2
ENSG00000078808.19	3.45505	-1.1175	1.29001	-0.866271	0.386342	0.999872	ENSG00000078808	SDF4
ENSG00000078814.17	3.28415	0.108401	1.08393	0.100007	0.920339	0.999872	ENSG00000078814	MYH7B
ENSG00000078900.15	15.8949	0.0327772	0.54318	0.0603432	0.951882	0.999872	ENSG00000078900	TP73
ENSG00000078902.16	4.17344	0.542595	1.08431	0.500408	0.616788	0.999872	ENSG00000078902	TOLLIP
ENSG00000078967.13	7.88086	0.108233	0.689475	0.156979	0.875262	0.999872	ENSG00000078967	UBE2D4
ENSG00000079102.16	62.8316	-0.302922	0.325745	-0.929935	0.352405	0.999872	ENSG00000079102	RUNX1T1
ENSG00000079134.12	60.2313	0.00967367	0.28528	0.0339094	0.972949	0.999872	ENSG00000079134	THOC1
ENSG00000079150.18	21.377	0.278727	0.551857	0.505072	0.613508	0.999872	ENSG00000079150	FKBP7
ENSG00000079156.17	22.3705	-0.481312	0.553365	-0.86979	0.384415	0.999872	ENSG00000079156	OSBPL6
ENSG00000079215.14	0.588164	1.28031	2.62534	0.487673	0.625782	0.999872	ENSG00000079215	SLC1A3
ENSG00000079246.16	1044.33	0.0517118	0.0764774	0.676171	0.498932	0.999872	ENSG00000079246	XRCC5
ENSG00000079257.8	1.75398	1.88143	1.61095	1.1679	0.242847	0.999872	ENSG00000079257	LXN
ENSG00000079263.19	25.5621	-0.0267147	0.549836	-0.0485866	0.961249	0.999872	ENSG00000079263	SP140
ENSG00000079277.22	226.729	0.156871	0.165445	0.948175	0.34304	0.999872	ENSG00000079277	MKNK1
ENSG00000079308.19	1546.38	-0.0120398	0.151507	-0.079467	0.936661	0.999872	ENSG00000079308	TNS1
ENSG00000079332.15	394.237	0.0445925	0.139513	0.31963	0.749249	0.999872	ENSG00000079332	SAR1A
ENSG00000079335.20	0.931831	-0.565574	2.29592	-0.246339	0.80542	0.999872	ENSG00000079335	CDC14A
ENSG00000079337.16	11.8832	0.286877	0.696971	0.411605	0.680629	0.999872	ENSG00000079337	RAPGEF3
ENSG00000079385.23	171.782	-0.235872	0.156884	-1.50348	0.132714	0.999872	ENSG00000079385	CEACAM1
ENSG00000079387.14	61.6508	-0.491995	0.3555	-1.38395	0.166373	0.999872	ENSG00000079387	SENP1
ENSG00000079393.20	0.449946	-0.470977	3.05238	-0.154298	0.877375	0.999872	ENSG00000079393	DUSP13
ENSG00000079432.7	155.084	0.0670428	0.183735	0.364888	0.715195	0.999872	ENSG00000079432	CIC
ENSG00000079459.13	367.993	0.0506742	0.123029	0.41189	0.68042	0.999872	ENSG00000079459	FDFT1
ENSG00000079462.8	69.2095	1.39155	0.990567	1.40481	0.160079	0.999872	ENSG00000079462	PAFAH1B3
ENSG00000079616.13	28.6438	0.585923	0.344314	1.70171	0.0888089	0.999872	ENSG00000079616	KIF22
ENSG00000079689.14	0.912115	-0.404429	3.0893	-0.130913	0.895844	0.999872	ENSG00000079689	SCGN
ENSG00000079691.18	28.5509	0.429084	0.388411	1.10471	0.269283	0.999872	ENSG00000079691	CARMIL1
ENSG00000079739.17	0.20898	-0.26812	3.08419	-0.0869339	0.930724	0.999872	ENSG00000079739	PGM1
ENSG00000079805.18	88.165	0.056733	0.230049	0.246613	0.805208	0.999872	ENSG00000079805	DNM2
ENSG00000079819.19	507.067	-0.391729	0.152742	-2.56464	0.0103282	0.999872	ENSG00000079819	EPB41L2
ENSG00000079841.18	0.128387	-0.7858	3.09295	-0.254062	0.799448	0.999872	ENSG00000079841	RIMS1
ENSG00000079931.15	0.19642	-1.10045	3.11077	-0.353753	0.723524	0.999872	ENSG00000079931	MOXD1
ENSG00000079950.14	0.38106	0.293957	3.10093	0.0947964	0.924477	0.999872	ENSG00000079950	STX7
ENSG00000079974.18	243.009	-0.132327	0.135955	-0.973312	0.330398	0.999872	ENSG00000079974	RABL2B
ENSG00000079999.14	321.963	0.0962912	0.118927	0.809666	0.418132	0.999872	ENSG00000079999	KEAP1
ENSG00000080031.10	86.3222	-0.359971	0.214603	-1.67738	0.0934673	0.999872	ENSG00000080031	PTPRH
ENSG00000080166.16	0.102116	0.249189	3.11175	0.0800799	0.936174	0.999872	ENSG00000080166	DCT
ENSG00000080189.15	221.698	-0.144269	0.145492	-0.991593	0.321396	0.999872	ENSG00000080189	SLC35C2
ENSG00000080200.10	0.398383	0.026683	3.07042	0.00869034	0.993066	0.999872	ENSG00000080200	CRYBG3
ENSG00000080224.17	0.241987	0.945862	3.08044	0.307054	0.758802	0.999872	ENSG00000080224	EPHA6
ENSG00000080293.10	5.01293	-0.0964209	0.771469	-0.124984	0.900537	0.999872	ENSG00000080293	SCTR
ENSG00000080298.15	40.6346	0.00841409	0.360288	0.0233538	0.981368	0.999872	ENSG00000080298	RFX3
ENSG00000080345.18	245.534	-0.016427	0.17727	-0.0926665	0.926169	0.999872	ENSG00000080345	RIF1
ENSG00000080371.6	11.7319	-0.605488	0.546064	-1.10882	0.267507	0.999872	ENSG00000080371	RAB21
ENSG00000080493.18	141.687	0.309238	0.42755	0.723279	0.469509	0.999872	ENSG00000080493	SLC4A4
ENSG00000080503.24	291.562	-0.0822778	0.258003	-0.318903	0.7498	0.999872	ENSG00000080503	SMARCA2
ENSG00000080546.13	124.078	-0.29961	0.197186	-1.51943	0.128654	0.999872	ENSG00000080546	SESN1
ENSG00000080561.14	49.8098	-0.142669	0.268773	-0.530815	0.595547	0.999872	ENSG00000080561	MID2
ENSG00000080573.7	0.827744	0.324554	2.32529	0.139576	0.888995	0.999872	ENSG00000080573	COL5A3
ENSG00000080603.17	18.9396	-0.664724	0.550867	-1.20669	0.227553	0.999872	ENSG00000080603	SRCAP
ENSG00000080608.10	75.1225	0.0727277	0.250742	0.29005	0.771778	0.999872	ENSG00000080608	PUM3
ENSG00000080709.16	5.49308	-0.0552391	0.873104	-0.0632675	0.949553	0.999872	ENSG00000080709	KCNN2
ENSG00000080802.19	121.092	0.0568276	0.156324	0.363524	0.716213	0.999872	ENSG00000080802	CNOT4
ENSG00000080815.19	3.6104	-1.08341	1.1445	-0.946622	0.343832	0.999872	ENSG00000080815	PSEN1
ENSG00000080822.17	133.256	-0.358638	0.455539	-0.787284	0.431115	0.999872	ENSG00000080822	CLDND1
ENSG00000080823.23	111.978	0.0231968	0.208986	0.110997	0.911619	0.999872	ENSG00000080823	MOK
ENSG00000080824.19	1401.71	0.12406	0.151443	0.819188	0.412679	0.999872	ENSG00000080824	HSP90AA1
ENSG00000080845.18	483.761	0.0244235	0.102443	0.23841	0.811563	0.999872	ENSG00000080845	DLGAP4
ENSG00000080854.16	0.52275	0.837606	3.06085	0.273652	0.784352	0.999872	ENSG00000080854	IGSF9B
ENSG00000080910.13	588.841	-0.129254	0.166181	-0.777791	0.436692	0.999872	ENSG00000080910	CFHR2
ENSG00000080947.15	16.2918	0.0587344	0.475731	0.123461	0.901742	0.999872	ENSG00000080947	CROCCP3
ENSG00000080986.13	1.04529	-0.225371	2.5492	-0.0884082	0.929552	0.999872	ENSG00000080986	NDC80
ENSG00000081014.11	0.10156	-0.166678	3.11604	-0.0534903	0.957341	0.999872	ENSG00000081014	AP4E1
ENSG00000081019.13	189.921	0.0865839	0.210003	0.412299	0.680121	0.999872	ENSG00000081019	RSBN1
ENSG00000081026.19	6.57042	-0.0330337	0.966517	-0.0341781	0.972735	0.999872	ENSG00000081026	MAGI3
ENSG00000081041.9	0.893073	-1.47334	3.0669	-0.480402	0.630942	0.999872	ENSG00000081041	CXCL2
ENSG00000081051.8	0.548706	-1.18944	3.09155	-0.384738	0.700432	0.999872	ENSG00000081051	AFP
ENSG00000081059.20	64.7025	-0.305126	0.266927	-1.14311	0.252994	0.999872	ENSG00000081059	TCF7
ENSG00000081087.15	0.387206	1.3755	3.07312	0.44759	0.654449	0.999872	ENSG00000081087	OSTM1
ENSG00000081154.12	466.046	-0.0266089	0.105642	-0.251878	0.801135	0.999872	ENSG00000081154	PCNP
ENSG00000081177.18	38.7141	0.0520434	0.299156	0.173968	0.861891	0.999872	ENSG00000081177	EXD2
ENSG00000081181.8	0.085591	-0.764333	3.10125	-0.246459	0.805327	0.999872	ENSG00000081181	ARG2
ENSG00000081189.16	49.6231	0.289788	0.279175	1.03802	0.299262	0.999872	ENSG00000081189	MEF2C
ENSG00000081237.20	129.364	-0.115706	0.301077	-0.384308	0.70075	0.999872	ENSG00000081237	PTPRC
ENSG00000081307.14	115.064	0.135414	0.192971	0.701731	0.482847	0.999872	ENSG00000081307	UBA5
ENSG00000081320.11	1.70449	1.45495	1.72655	0.842692	0.399401	0.999872	ENSG00000081320	STK17B
ENSG00000081377.17	33.8941	-0.0226685	0.426851	-0.0531063	0.957647	0.999872	ENSG00000081377	CDC14B
ENSG00000081386.12	12.6085	0.0971979	0.568357	0.171016	0.864211	0.999872	ENSG00000081386	ZNF510
ENSG00000081479.15	1.74652	-1.37399	1.71979	-0.798925	0.424334	0.999872	ENSG00000081479	LRP2
ENSG00000081665.14	75.1413	0.211072	0.218719	0.965041	0.334524	0.999872	ENSG00000081665	ZNF506
ENSG00000081692.12	108.613	0.139833	0.176108	0.794017	0.427185	0.999872	ENSG00000081692	JMJD4
ENSG00000081721.12	66.8754	0.0438688	0.216774	0.202372	0.839626	0.999872	ENSG00000081721	DUSP12
ENSG00000081760.17	170.002	-0.0191713	0.17119	-0.111989	0.910832	0.999872	ENSG00000081760	AACS
ENSG00000081791.9	8.01267	-0.126498	0.667705	-0.189452	0.849739	0.999872	ENSG00000081791	DELE1
ENSG00000081803.16	92.3299	0.372753	0.279664	1.33286	0.182578	0.999872	ENSG00000081803	CADPS2
ENSG00000081842.18	1.42371	0.206476	1.93532	0.106689	0.915036	0.999872	ENSG00000081842	PCDHA6
ENSG00000081853.15	3.42356	-0.800702	1.00936	-0.79328	0.427615	0.999872	ENSG00000081853	PCDHGA2
ENSG00000081870.12	6.21345	-0.775205	0.782195	-0.991063	0.321655	0.999872	ENSG00000081870	HSPB11
ENSG00000081913.14	0.755051	0.34133	3.07415	0.111032	0.911591	0.999872	ENSG00000081913	PHLPP1
ENSG00000081923.15	0.102116	0.249189	3.11175	0.0800799	0.936174	0.999872	ENSG00000081923	ATP8B1
ENSG00000081985.13	2.40592	-0.433242	1.62889	-0.265974	0.790259	0.999872	ENSG00000081985	IL12RB2
ENSG00000082014.17	75.3813	-0.228405	0.230313	-0.991715	0.321337	0.999872	ENSG00000082014	SMARCD3
ENSG00000082068.9	35.224	0.306785	0.320214	0.958061	0.338032	0.999872	ENSG00000082068	WDR70
ENSG00000082074.19	106.034	0.341457	0.227067	1.50377	0.132639	0.999872	ENSG00000082074	FYB1
ENSG00000082126.18	1.44721	-1.6583	2.04914	-0.809265	0.418363	0.999872	ENSG00000082126	MPP4
ENSG00000082146.13	93.488	-0.134236	0.240675	-0.557749	0.577016	0.999872	ENSG00000082146	STRADB
ENSG00000082153.18	165.708	-0.292304	0.161918	-1.80525	0.0710349	0.999872	ENSG00000082153	BZW1
ENSG00000082175.15	0.775286	0.639336	3.0758	0.20786	0.835338	0.999872	ENSG00000082175	PGR
ENSG00000082196.21	4.80575	0.299346	1.22969	0.243433	0.80767	0.999872	ENSG00000082196	C1QTNF3
ENSG00000082212.13	31.7809	0.378833	0.38252	0.990361	0.321998	0.999872	ENSG00000082212	ME2
ENSG00000082258.13	0.689569	0.622851	3.03314	0.205349	0.8373	0.999872	ENSG00000082258	CCNT2
ENSG00000082269.17	119.693	-0.374327	0.264269	-1.41646	0.15664	0.999872	ENSG00000082269	FAM135A
ENSG00000082293.13	0.958038	-1.77552	3.0841	-0.575701	0.564817	0.999872	ENSG00000082293	COL19A1
ENSG00000082397.17	86.3324	-0.101924	0.195702	-0.520813	0.602497	0.999872	ENSG00000082397	EPB41L3
ENSG00000082438.17	217.517	-0.425267	0.193473	-2.19807	0.0279444	0.999872	ENSG00000082438	COBLL1
ENSG00000082458.12	98.6193	-0.224854	0.249453	-0.901387	0.367382	0.999872	ENSG00000082458	DLG3
ENSG00000082512.15	6.24059	-0.409936	0.788292	-0.52003	0.603043	0.999872	ENSG00000082512	TRAF5
ENSG00000082515.18	205.098	0.512099	0.172704	2.96518	0.00302503	0.999872	ENSG00000082515	MRPL22
ENSG00000082641.16	594.059	0.0679392	0.108451	0.626451	0.531019	0.999872	ENSG00000082641	NFE2L1
ENSG00000082684.16	6.96346	-0.297799	0.67024	-0.444317	0.656813	0.999872	ENSG00000082684	SEMA5B
ENSG00000082701.17	0.316116	0.0863041	3.09476	0.0278872	0.977752	0.999872	ENSG00000082701	GSK3B
ENSG00000082781.12	12.3459	-0.0360722	2.36328	-0.0152636	0.987822	0.999872	ENSG00000082781	ITGB5
ENSG00000082805.20	143.688	-0.0588134	0.200921	-0.292719	0.769737	0.999872	ENSG00000082805	ERC1
ENSG00000082898.18	10.6521	0.0724191	0.722224	0.100272	0.920128	0.999872	ENSG00000082898	XPO1
ENSG00000082929.8	12.1802	0.204239	0.83268	0.245279	0.806241	0.999872	ENSG00000082929	LINC01587
ENSG00000082996.20	35.8558	-2.15125	1.99892	-1.07621	0.281834	0.999872	ENSG00000082996	RNF13
ENSG00000083067.23	0.484445	-1.13675	2.74034	-0.414821	0.678273	0.999872	ENSG00000083067	TRPM3
ENSG00000083093.10	32.1471	-0.08216	0.408456	-0.201148	0.840583	0.999872	ENSG00000083093	PALB2
ENSG00000083097.14	29.5425	0.637633	0.430062	1.48265	0.138167	0.999872	ENSG00000083097	DOP1A
ENSG00000083099.11	104.19	0.0230595	0.227158	0.101513	0.919143	0.999872	ENSG00000083099	LYRM2
ENSG00000083123.15	13.6176	-0.518903	0.808009	-0.642199	0.520744	0.999872	ENSG00000083123	BCKDHB
ENSG00000083168.11	19.8962	-0.0824188	0.381772	-0.215885	0.829078	0.999872	ENSG00000083168	KAT6A
ENSG00000083223.18	218.355	-0.0437038	0.184577	-0.236778	0.812829	0.999872	ENSG00000083223	TUT7
ENSG00000083290.20	6.72151	0.249107	0.841997	0.295852	0.767343	0.999872	ENSG00000083290	ULK2
ENSG00000083307.12	8.55541	0.751867	0.644462	1.16666	0.243348	0.999872	ENSG00000083307	GRHL2
ENSG00000083312.17	620.378	-0.175165	0.136851	-1.27997	0.200556	0.999872	ENSG00000083312	TNPO1
ENSG00000083444.17	515.447	0.108849	0.123112	0.884147	0.376617	0.999872	ENSG00000083444	PLOD1
ENSG00000083454.22	38.8012	0.153074	0.350978	0.436134	0.662739	0.999872	ENSG00000083454	P2RX5
ENSG00000083457.12	75.0673	-0.0816409	0.229249	-0.356123	0.721748	0.999872	ENSG00000083457	ITGAE
ENSG00000083520.15	5.57214	1.76089	2.54994	0.690558	0.489843	0.999872	ENSG00000083520	DIS3
ENSG00000083535.16	7.54443	0.172783	1.23632	0.139756	0.888853	0.999872	ENSG00000083535	PIBF1
ENSG00000083544.16	19.4896	0.289236	0.464422	0.622787	0.533425	0.999872	ENSG00000083544	TDRD3
ENSG00000083642.19	31.1164	-0.334668	0.426616	-0.784471	0.432764	0.999872	ENSG00000083642	PDS5B
ENSG00000083720.13	1.03079	-0.397144	3.03657	-0.130787	0.895944	0.999872	ENSG00000083720	OXCT1
ENSG00000083750.13	0.789704	1.10556	2.34194	0.472068	0.636878	0.999872	ENSG00000083750	RRAGB
ENSG00000083799.18	90.0378	0.447168	0.438012	1.0209	0.3073	0.999872	ENSG00000083799	CYLD
ENSG00000083807.10	638.985	0.0348991	0.152221	0.229266	0.818662	0.999872	ENSG00000083807	SLC27A5
ENSG00000083812.12	28.6477	0.300218	0.362241	0.82878	0.407229	0.999872	ENSG00000083812	ZNF324
ENSG00000083814.13	17.2748	-0.333318	0.45971	-0.725061	0.468414	0.999872	ENSG00000083814	ZNF671
ENSG00000083828.16	17.4811	0.170409	0.516688	0.32981	0.741544	0.999872	ENSG00000083828	ZNF586
ENSG00000083838.16	21.7156	-0.887612	0.549857	-1.61426	0.106471	0.999872	ENSG00000083838	ZNF446
ENSG00000083844.10	162.416	0.248676	0.247243	1.0058	0.314514	0.999872	ENSG00000083844	ZNF264
ENSG00000083845.9	3860.99	0.00287702	0.0714167	0.040285	0.967866	0.999872	ENSG00000083845	RPS5
ENSG00000083857.14	2.80955	-1.10429	1.69666	-0.65086	0.515137	0.999872	ENSG00000083857	FAT1
ENSG00000083896.13	186.956	-0.250729	0.40441	-0.619986	0.535267	0.999872	ENSG00000083896	YTHDC1
ENSG00000083937.10	328.177	-0.0262882	0.1449	-0.181423	0.856036	0.999872	ENSG00000083937	CHMP2B
ENSG00000084070.12	181.685	0.163286	0.156968	1.04025	0.298224	0.999872	ENSG00000084070	SMAP2
ENSG00000084072.17	183.339	-0.0226421	0.134459	-0.168394	0.866273	0.999872	ENSG00000084072	PPIE
ENSG00000084073.10	0.16088	0.770044	3.11038	0.247572	0.804465	0.999872	ENSG00000084073	ZMPSTE24
ENSG00000084090.13	487.284	0.00077079	0.109622	0.00703133	0.99439	0.999872	ENSG00000084090	STARD7
ENSG00000084110.11	83.3117	-0.116828	0.271764	-0.429887	0.667278	0.999872	ENSG00000084110	HAL
ENSG00000084112.15	10.7473	0.541594	0.542533	0.99827	0.318149	0.999872	ENSG00000084112	SSH1
ENSG00000084207.18	3.21339	-1.62442	1.13621	-1.42968	0.152808	0.999872	ENSG00000084207	GSTP1
ENSG00000084234.18	3190.81	0.324433	0.107694	3.01254	0.00259074	0.999872	ENSG00000084234	APLP2
ENSG00000084444.14	12.0789	0.287037	0.532815	0.538717	0.590082	0.999872	ENSG00000084444	FAM234B
ENSG00000084453.16	2.16285	-2.7075	1.66708	-1.6241	0.104354	0.999872	ENSG00000084453	SLCO1A2
ENSG00000084463.8	0.0668953	-0.63031	3.11459	-0.202374	0.839625	0.999872	ENSG00000084463	WBP11
ENSG00000084628.10	0.0457255	-0.577147	3.10685	-0.185766	0.852628	0.999872	ENSG00000084628	NKAIN1
ENSG00000084652.16	31.1125	1.23647	0.933042	1.32521	0.185103	0.999872	ENSG00000084652	TXLNA
ENSG00000084674.15	3609.95	0.119826	0.123424	0.970846	0.331625	0.999872	ENSG00000084674	APOB
ENSG00000084676.15	153.437	-0.06969	0.197752	-0.352411	0.72453	0.999872	ENSG00000084676	NCOA1
ENSG00000084710.14	0.624794	0.175552	3.06095	0.0573522	0.954265	0.999872	ENSG00000084710	EFR3B
ENSG00000084731.15	0.866878	0.00343676	3.04915	0.00112712	0.999101	0.999872	ENSG00000084731	KIF3C
ENSG00000084733.11	0.117529	0.431319	3.1018	0.139055	0.889407	0.999872	ENSG00000084733	RAB10
ENSG00000084734.9	38.7367	-0.0658294	0.288715	-0.228008	0.81964	0.999872	ENSG00000084734	GCKR
ENSG00000084754.12	73.3694	-0.222804	0.247656	-0.89965	0.368307	0.999872	ENSG00000084754	HADHA
ENSG00000084764.12	76.9695	-0.329485	0.284483	-1.15819	0.246787	0.999872	ENSG00000084764	MAPRE3
ENSG00000084774.14	8.22599	0.137944	0.635121	0.217194	0.828057	0.999872	ENSG00000084774	CAD
ENSG00000085063.17	8.18243	-0.758501	0.68855	-1.10159	0.270639	0.999872	ENSG00000085063	CD59
ENSG00000085185.15	75.69	-0.0334902	0.244027	-0.13724	0.890841	0.999872	ENSG00000085185	BCORL1
ENSG00000085224.23	58.2994	-0.0641197	0.286671	-0.22367	0.823014	0.999872	ENSG00000085224	ATRX
ENSG00000085231.14	7.62102	0.959451	2.80785	0.341704	0.732574	0.999872	ENSG00000085231	AK6
ENSG00000085265.11	59.403	0.125351	0.295557	0.424117	0.671481	0.999872	ENSG00000085265	FCN1
ENSG00000085274.16	55.1216	0.00274029	0.266407	0.0102861	0.991793	0.999872	ENSG00000085274	MYNN
ENSG00000085276.19	63.3385	0.8096	0.303884	2.66417	0.00771778	0.999872	ENSG00000085276	MECOM
ENSG00000085365.18	56.5704	0.528869	1.19573	0.4423	0.658272	0.999872	ENSG00000085365	SCAMP1
ENSG00000085377.15	8.5075	0.27947	0.593431	0.470939	0.637685	0.999872	ENSG00000085377	PREP
ENSG00000085382.12	5.2255	0.681872	1.35967	0.501498	0.61602	0.999872	ENSG00000085382	HACE1
ENSG00000085415.16	188.242	-0.341917	0.192933	-1.77221	0.0763603	0.999872	ENSG00000085415	SEH1L
ENSG00000085433.16	24.3265	-0.0934422	0.375285	-0.24899	0.803369	0.999872	ENSG00000085433	WDR47
ENSG00000085449.15	2.07789	0.250526	1.82452	0.137311	0.890785	0.999872	ENSG00000085449	WDFY1
ENSG00000085491.17	0.558815	-1.29505	3.08202	-0.420195	0.674343	0.999872	ENSG00000085491	SLC25A24
ENSG00000085511.20	97.7191	-0.474311	0.286762	-1.65402	0.098123	0.999872	ENSG00000085511	MAP3K4
ENSG00000085514.16	13.6446	0.879931	0.568009	1.54915	0.121346	0.999872	ENSG00000085514	PILRA
ENSG00000085552.17	8.0048	0.0759284	0.62344	0.121789	0.903066	0.999872	ENSG00000085552	IGSF9
ENSG00000085644.14	5.15494	-0.444489	0.949961	-0.467903	0.639854	0.999872	ENSG00000085644	ZNF213
ENSG00000085662.14	2.20558	-0.220761	1.34715	-0.163873	0.869831	0.999872	ENSG00000085662	AKR1B1
ENSG00000085719.13	0.696748	-0.066704	3.07794	-0.0216716	0.98271	0.999872	ENSG00000085719	CPNE3
ENSG00000085721.13	0.0587645	0.288426	3.11445	0.0926088	0.926214	0.999872	ENSG00000085721	RRN3
ENSG00000085733.16	763.119	-0.141447	0.0917238	-1.5421	0.123049	0.999872	ENSG00000085733	CTTN
ENSG00000085760.15	104.488	-0.1759	0.204639	-0.859567	0.390028	0.999872	ENSG00000085760	MTIF2
ENSG00000085788.14	10.8411	-0.735316	0.715487	-1.02771	0.304084	0.999872	ENSG00000085788	DDHD2
ENSG00000085831.15	52.0042	0.222092	0.286576	0.774984	0.438349	0.999872	ENSG00000085831	TTC39A
ENSG00000085832.17	164.944	-0.152349	0.239766	-0.635408	0.525162	0.999872	ENSG00000085832	EPS15
ENSG00000085871.9	499.23	0.202669	0.117533	1.72435	0.0846448	0.999872	ENSG00000085871	MGST2
ENSG00000085872.15	7.00297	-0.568907	0.670094	-0.848995	0.395884	0.999872	ENSG00000085872	CHERP
ENSG00000085978.22	102.474	0.0471696	0.246614	0.191269	0.848315	0.999872	ENSG00000085978	ATG16L1
ENSG00000085982.14	231.368	0.059478	0.166562	0.357091	0.721023	0.999872	ENSG00000085982	USP40
ENSG00000085998.14	123.308	-0.0201274	0.209595	-0.0960301	0.923497	0.999872	ENSG00000085998	POMGNT1
ENSG00000085999.13	0.37198	0.641777	3.08801	0.207829	0.835363	0.999872	ENSG00000085999	RAD54L
ENSG00000086015.22	1.59401	1.06555	1.59938	0.666222	0.505269	0.999872	ENSG00000086015	MAST2
ENSG00000086061.16	48.342	-0.079222	0.294167	-0.26931	0.787691	0.999872	ENSG00000086061	DNAJA1
ENSG00000086062.13	0.0371729	0.287751	3.11438	0.0923943	0.926385	0.999872	ENSG00000086062	B4GALT1
ENSG00000086065.14	528.33	-0.0703784	0.102131	-0.689101	0.490759	0.999872	ENSG00000086065	CHMP5
ENSG00000086102.19	133.859	-0.0933659	0.201392	-0.463603	0.642932	0.999872	ENSG00000086102	NFX1
ENSG00000086159.13	1.79046	0.618092	1.52501	0.405304	0.685254	0.999872	ENSG00000086159	AQP6
ENSG00000086189.10	15.9836	0.432603	0.486615	0.889005	0.374	0.999872	ENSG00000086189	DIMT1
ENSG00000086200.17	93.9804	0.123893	0.219064	0.565559	0.571693	0.999872	ENSG00000086200	IPO11
ENSG00000086205.18	16.5071	-0.30497	0.631356	-0.483039	0.629068	0.999872	ENSG00000086205	FOLH1
ENSG00000086232.13	2.35595	-0.680897	1.40373	-0.485063	0.627632	0.999872	ENSG00000086232	EIF2AK1
ENSG00000086288.12	0.320754	-1.14778	3.08882	-0.371591	0.710197	0.999872	ENSG00000086288	NME8
ENSG00000086289.12	0.129524	-0.604481	3.11278	-0.194193	0.846024	0.999872	ENSG00000086289	EPDR1
ENSG00000086300.16	211.152	-0.0960737	0.15198	-0.632147	0.527291	0.999872	ENSG00000086300	SNX10
ENSG00000086475.15	6.58969	1.7051	3.05528	0.558082	0.576788	0.999872	ENSG00000086475	SEPHS1
ENSG00000086504.17	119.995	0.0965404	0.222466	0.433956	0.66432	0.999872	ENSG00000086504	MRPL28
ENSG00000086570.12	0.132296	0.466219	3.10577	0.150114	0.880675	0.999872	ENSG00000086570	FAT2
ENSG00000086589.12	87.2601	-0.142529	0.334758	-0.425768	0.670277	0.999872	ENSG00000086589	RBM22
ENSG00000086598.11	1.03129	-0.114874	2.23335	-0.0514359	0.958978	0.999872	ENSG00000086598	TMED2
ENSG00000086619.14	3.01355	-0.640105	1.0895	-0.587524	0.556852	0.999872	ENSG00000086619	ERO1B
ENSG00000086666.19	55.9788	1.51231	1.37912	1.09658	0.272827	0.999872	ENSG00000086666	ZFAND6
ENSG00000086696.11	26.7183	0.0354378	0.463072	0.0765275	0.938999	0.999872	ENSG00000086696	HSD17B2
ENSG00000086712.13	16.1682	-2.34399	2.64566	-0.885976	0.37563	0.999872	ENSG00000086712	TXLNG
ENSG00000086717.18	0.177042	-1.39479	3.09209	-0.451083	0.65193	0.999872	ENSG00000086717	PPEF1
ENSG00000086730.17	68.2244	0.280995	0.21302	1.3191	0.187134	0.999872	ENSG00000086730	LAT2
ENSG00000086758.16	365.013	0.00483776	0.178299	0.0271328	0.978354	0.999872	ENSG00000086758	HUWE1
ENSG00000086848.15	97.7973	0.18817	0.211224	0.890856	0.373006	0.999872	ENSG00000086848	ALG9
ENSG00000086967.10	0.219089	-0.091492	3.08884	-0.0296202	0.97637	0.999872	ENSG00000086967	MYBPC2
ENSG00000086991.13	13.8325	-0.544325	0.531786	-1.02358	0.306034	0.999872	ENSG00000086991	NOX4
ENSG00000087008.16	0.085591	-0.764333	3.10125	-0.246459	0.805327	0.999872	ENSG00000087008	ACOX3
ENSG00000087053.20	0.380844	-0.595593	3.08211	-0.193242	0.84677	0.999872	ENSG00000087053	MTMR2
ENSG00000087074.8	1.95309	0.502893	1.48801	0.337964	0.73539	0.999872	ENSG00000087074	PPP1R15A
ENSG00000087076.9	30.8972	0.233029	0.375606	0.620408	0.534989	0.999872	ENSG00000087076	HSD17B14
ENSG00000087085.16	31.2608	-0.0199489	0.379845	-0.0525186	0.958115	0.999872	ENSG00000087085	ACHE
ENSG00000087087.20	357.512	-0.0988923	0.135451	-0.730098	0.46533	0.999872	ENSG00000087087	SRRT
ENSG00000087088.20	23.4077	0.189632	0.486675	0.389648	0.696797	0.999872	ENSG00000087088	BAX
ENSG00000087095.13	17.5147	-0.35033	0.525417	-0.666765	0.504922	0.999872	ENSG00000087095	NLK
ENSG00000087111.21	87.9782	0.0462083	0.209094	0.220993	0.825098	0.999872	ENSG00000087111	PIGS
ENSG00000087116.16	48.5844	-0.117104	0.249395	-0.469551	0.638676	0.999872	ENSG00000087116	ADAMTS2
ENSG00000087152.15	892.642	-0.0662661	0.150763	-0.439537	0.660273	0.999872	ENSG00000087152	ATXN7L3
ENSG00000087157.19	102.815	0.0800202	0.197977	0.40419	0.686073	0.999872	ENSG00000087157	PGS1
ENSG00000087191.13	409.442	-0.024211	0.134668	-0.179782	0.857324	0.999872	ENSG00000087191	PSMC5
ENSG00000087206.17	132.944	-0.243087	0.256077	-0.949274	0.342481	0.999872	ENSG00000087206	UIMC1
ENSG00000087237.12	31.0823	-0.398158	0.347445	-1.14596	0.251811	0.999872	ENSG00000087237	CETP
ENSG00000087250.9	5.76719	-0.899766	1.08577	-0.828688	0.407281	0.999872	ENSG00000087250	MT3
ENSG00000087253.13	2.70361	1.13656	1.44803	0.784902	0.432511	0.999872	ENSG00000087253	LPCAT2
ENSG00000087258.16	15.6129	-0.0687344	0.660249	-0.104104	0.917087	0.999872	ENSG00000087258	GNAO1
ENSG00000087263.17	8.80767	-0.437843	0.798555	-0.548294	0.58349	0.999872	ENSG00000087263	OGFOD1
ENSG00000087266.17	248.987	0.0653569	0.149265	0.437858	0.661489	0.999872	ENSG00000087266	SH3BP2
ENSG00000087269.16	238.812	0.00759049	0.12421	0.0611101	0.951272	0.999872	ENSG00000087269	NOP14
ENSG00000087274.17	763.335	0.153456	0.0895119	1.71436	0.086462	0.999872	ENSG00000087274	ADD1
ENSG00000087299.12	0.0617059	-0.597806	3.11098	-0.19216	0.847617	0.999872	ENSG00000087299	L2HGDH
ENSG00000087301.9	1.24096	-1.36388	3.03502	-0.449383	0.653155	0.999872	ENSG00000087301	TXNDC16
ENSG00000087302.9	77.6304	0.480757	0.261764	1.8366	0.0662684	0.999872	ENSG00000087302	RTRAF
ENSG00000087303.18	26.7299	0.392569	0.385611	1.01804	0.308657	0.999872	ENSG00000087303	NID2
ENSG00000087338.5	30.0679	-0.113625	0.320362	-0.354675	0.722833	0.999872	ENSG00000087338	GMCL1
ENSG00000087365.16	740.073	0.0269166	0.0935425	0.287748	0.77354	0.999872	ENSG00000087365	SF3B2
ENSG00000087448.11	0.208691	-0.375343	3.10156	-0.121018	0.903677	0.999872	ENSG00000087448	KLHL42
ENSG00000087460.27	997.567	-0.100267	0.0951544	-1.05373	0.292008	0.999872	ENSG00000087460	GNAS
ENSG00000087470.18	160.603	-0.113112	0.190163	-0.594817	0.551966	0.999872	ENSG00000087470	DNM1L
ENSG00000087494.16	9.39523	-0.648185	0.653392	-0.992031	0.321183	0.999872	ENSG00000087494	PTHLH
ENSG00000087495.17	2.84636	-1.17087	1.20081	-0.975065	0.329528	0.999872	ENSG00000087495	PHACTR3
ENSG00000087502.18	47.7825	-0.276108	0.360685	-0.765508	0.443969	0.999872	ENSG00000087502	ERGIC2
ENSG00000087586.18	18.2324	0.740313	0.412521	1.7946	0.0727168	0.999872	ENSG00000087586	AURKA
ENSG00000087589.16	2.88581	-0.235584	1.00546	-0.234305	0.814748	0.999872	ENSG00000087589	CASS4
ENSG00000087842.11	63.989	0.0808346	0.254734	0.31733	0.750993	0.999872	ENSG00000087842	PIR
ENSG00000087884.14	75.8969	0.046552	0.244161	0.190661	0.848791	0.999872	ENSG00000087884	AAMDC
ENSG00000087903.13	25.0211	-0.00126218	0.729173	-0.00173098	0.998619	0.999872	ENSG00000087903	RFX2
ENSG00000087995.16	31.3794	-0.607428	0.487535	-1.24592	0.212795	0.999872	ENSG00000087995	METTL2A
ENSG00000088002.12	0.0743458	0.433745	3.10198	0.139828	0.888795	0.999872	ENSG00000088002	SULT2B1
ENSG00000088038.19	14.4479	-0.686711	0.675811	-1.01613	0.309568	0.999872	ENSG00000088038	CNOT3
ENSG00000088053.11	2.23365	1.58633	1.62148	0.978321	0.327915	0.999872	ENSG00000088053	GP6
ENSG00000088179.9	24.353	0.193708	0.364951	0.530778	0.595573	0.999872	ENSG00000088179	PTPN4
ENSG00000088205.13	205.726	0.153339	0.202208	0.758322	0.448258	0.999872	ENSG00000088205	DDX18
ENSG00000088247.17	2652.58	-0.0779896	0.074266	-1.05014	0.293654	0.999872	ENSG00000088247	KHSRP
ENSG00000088256.9	6.05726	1.14332	1.01764	1.1235	0.261224	0.999872	ENSG00000088256	GNA11
ENSG00000088280.19	14.206	-0.434529	0.477799	-0.909441	0.363118	0.999872	ENSG00000088280	ASAP3
ENSG00000088305.18	3.88821	-0.446076	1.02516	-0.435129	0.663469	0.999872	ENSG00000088305	DNMT3B
ENSG00000088340.17	49.3093	-0.616926	0.356853	-1.7288	0.0838456	0.999872	ENSG00000088340	FER1L4
ENSG00000088367.23	156.8	-0.0982347	0.159734	-0.614991	0.538561	0.999872	ENSG00000088367	EPB41L1
ENSG00000088386.17	0.467626	-0.593217	3.06444	-0.193581	0.846504	0.999872	ENSG00000088386	SLC15A1
ENSG00000088387.19	203.803	-0.159917	0.178909	-0.893849	0.371403	0.999872	ENSG00000088387	DOCK9
ENSG00000088448.14	221.461	0.111053	0.21158	0.524877	0.599669	0.999872	ENSG00000088448	ANKRD10
ENSG00000088543.15	17.9971	-0.254735	0.437228	-0.582613	0.560154	0.999872	ENSG00000088543	C3orf18
ENSG00000088682.14	6.97741	1.04407	0.940421	1.11022	0.266906	0.999872	ENSG00000088682	COQ9
ENSG00000088726.16	0.141071	-0.122812	3.09676	-0.0396581	0.968366	0.999872	ENSG00000088726	TMEM40
ENSG00000088727.13	64.6905	-0.0617295	0.262547	-0.235118	0.814117	0.999872	ENSG00000088727	KIF9
ENSG00000088756.13	5.00698	-1.0222	0.763999	-1.33796	0.180909	0.999872	ENSG00000088756	ARHGAP28
ENSG00000088766.12	9.28321	-1.06589	1.137	-0.937459	0.348523	0.999872	ENSG00000088766	CRLS1
ENSG00000088808.18	226.742	0.0785847	0.16206	0.484912	0.627739	0.999872	ENSG00000088808	PPP1R13B
ENSG00000088812.18	9.55347	-0.111654	0.628407	-0.177679	0.858975	0.999872	ENSG00000088812	ATRN
ENSG00000088826.18	202.255	0.0198794	0.135999	0.146173	0.883785	0.999872	ENSG00000088826	SMOX
ENSG00000088827.12	80.2427	0.0917047	0.202305	0.453299	0.650333	0.999872	ENSG00000088827	SIGLEC1
ENSG00000088833.17	496.368	0.0734769	0.094635	0.776424	0.437499	0.999872	ENSG00000088833	NSFL1C
ENSG00000088836.14	18.6169	0.240044	0.471033	0.509612	0.610324	0.999872	ENSG00000088836	SLC4A11
ENSG00000088854.12	99.7598	-0.194144	0.186061	-1.04345	0.296741	0.999872	ENSG00000088854	DNAAF9
ENSG00000088876.13	33.3023	-0.142201	0.382761	-0.371515	0.710254	0.999872	ENSG00000088876	ZNF343
ENSG00000088881.21	21.8469	0.295916	0.388225	0.762229	0.445923	0.999872	ENSG00000088881	EBF4
ENSG00000088888.18	487.141	0.0275141	0.136011	0.202293	0.839687	0.999872	ENSG00000088888	MAVS
ENSG00000088899.15	30.1392	0.19483	0.333878	0.583536	0.559533	0.999872	ENSG00000088899	LZTS3
ENSG00000088926.14	24.2949	0.511048	0.5584	0.9152	0.360087	0.999872	ENSG00000088926	F11
ENSG00000088970.16	21.1787	0.429906	0.465363	0.923808	0.355587	0.999872	ENSG00000088970	KIZ
ENSG00000088986.11	402.07	1.966	0.862691	2.27891	0.0226724	0.999872	ENSG00000088986	DYNLL1
ENSG00000088992.18	261.081	-0.285072	0.206741	-1.37889	0.167929	0.999872	ENSG00000088992	TESC
ENSG00000089006.17	436.095	0.0428587	0.134402	0.318885	0.749814	0.999872	ENSG00000089006	SNX5
ENSG00000089009.15	8372.04	0.0368825	0.0557288	0.661821	0.508086	0.999872	ENSG00000089009	RPL6
ENSG00000089012.14	3.02904	-0.665394	1.2518	-0.53155	0.595038	0.999872	ENSG00000089012	SIRPG
ENSG00000089022.14	10.0413	-0.539732	0.658939	-0.819093	0.412733	0.999872	ENSG00000089022	MAPKAPK5
ENSG00000089041.17	0.490826	-0.19148	3.06928	-0.0623861	0.950255	0.999872	ENSG00000089041	P2RX7
ENSG00000089048.14	304.922	-0.0271872	0.117893	-0.230609	0.817619	0.999872	ENSG00000089048	ESF1
ENSG00000089053.13	386.905	0.0183821	0.11438	0.160711	0.872321	0.999872	ENSG00000089053	ANAPC5
ENSG00000089057.15	0.523756	-0.196984	3.07856	-0.0639857	0.948982	0.999872	ENSG00000089057	SLC23A2
ENSG00000089060.11	176.097	-0.035936	0.202744	-0.177248	0.859314	0.999872	ENSG00000089060	SLC8B1
ENSG00000089063.15	472.508	0.0425486	0.095647	0.444851	0.656428	0.999872	ENSG00000089063	TMEM230
ENSG00000089091.16	15.2512	0.0664128	0.520405	0.127618	0.898452	0.999872	ENSG00000089091	DZANK1
ENSG00000089094.19	115.021	-0.0161924	0.212775	-0.0761012	0.939339	0.999872	ENSG00000089094	KDM2B
ENSG00000089123.16	18.0437	-0.0827239	0.476415	-0.173638	0.86215	0.999872	ENSG00000089123	TASP1
ENSG00000089127.14	21.2129	0.979282	0.678228	1.44388	0.148772	0.999872	ENSG00000089127	OAS1
ENSG00000089154.11	0.0914509	-0.758667	3.10333	-0.244469	0.806868	0.999872	ENSG00000089154	GCN1
ENSG00000089157.16	64.807	0.215185	0.431805	0.498339	0.618245	0.999872	ENSG00000089157	RPLP0
ENSG00000089159.16	958.415	0.00554489	0.0875031	0.063368	0.949473	0.999872	ENSG00000089159	PXN
ENSG00000089163.4	15.0424	-0.0580207	0.508473	-0.114108	0.909152	0.999872	ENSG00000089163	SIRT4
ENSG00000089169.15	0.0617059	-0.597806	3.11098	-0.19216	0.847617	0.999872	ENSG00000089169	RPH3A
ENSG00000089177.19	44.5025	-0.312875	0.289695	-1.08001	0.280136	0.999872	ENSG00000089177	KIF16B
ENSG00000089195.15	160.605	0.0144737	0.165562	0.0874215	0.930336	0.999872	ENSG00000089195	TRMT6
ENSG00000089199.10	0.525586	-0.772224	3.06855	-0.251657	0.801306	0.999872	ENSG00000089199	CHGB
ENSG00000089248.7	486.729	0.0691663	0.127401	0.542903	0.587197	0.999872	ENSG00000089248	ERP29
ENSG00000089280.19	199.85	0.304038	0.414356	0.73376	0.463095	0.999872	ENSG00000089280	FUS
ENSG00000089327.15	33.935	1.66477	2.09714	0.793829	0.427295	0.999872	ENSG00000089327	FXYD5
ENSG00000089335.21	54.3755	-0.228556	0.35634	-0.6414	0.521263	0.999872	ENSG00000089335	ZNF302
ENSG00000089351.14	254.274	0.0111487	0.128145	0.0870004	0.930671	0.999872	ENSG00000089351	GRAMD1A
ENSG00000089356.18	7.98346	0.00983159	0.664112	0.0148041	0.988188	0.999872	ENSG00000089356	FXYD3
ENSG00000089472.16	20.4444	0.0118132	0.420912	0.0280658	0.97761	0.999872	ENSG00000089472	HEPH
ENSG00000089486.17	127.656	0.0652692	0.216871	0.300958	0.763447	0.999872	ENSG00000089486	CDIP1
ENSG00000089558.9	1.92036	-0.891497	1.55988	-0.571516	0.56765	0.999872	ENSG00000089558	KCNH4
ENSG00000089597.18	1625.58	-0.105622	0.0808347	-1.30665	0.191333	0.999872	ENSG00000089597	GANAB
ENSG00000089682.16	32.1935	-0.255447	0.323222	-0.790314	0.429344	0.999872	ENSG00000089682	RBM41
ENSG00000089685.15	6.35566	0.500061	0.934448	0.53514	0.592553	0.999872	ENSG00000089685	BIRC5
ENSG00000089692.9	8.85662	-0.421744	0.617788	-0.682668	0.494817	0.999872	ENSG00000089692	LAG3
ENSG00000089693.11	0.76213	-0.499807	3.06887	-0.162864	0.870626	0.999872	ENSG00000089693	MLF2
ENSG00000089723.10	0.430231	-1.58859	3.07403	-0.516778	0.605311	0.999872	ENSG00000089723	OTUB2
ENSG00000089737.17	77.3018	0.259174	0.368205	0.703886	0.481504	0.999872	ENSG00000089737	DDX24
ENSG00000089775.12	11.7692	0.0826988	0.692073	0.119494	0.904884	0.999872	ENSG00000089775	ZBTB25
ENSG00000089818.18	57.2952	0.0321568	0.245406	0.131035	0.895748	0.999872	ENSG00000089818	NECAP1
ENSG00000089820.16	80.6429	0.0745226	0.246457	0.302376	0.762365	0.999872	ENSG00000089820	ARHGAP4
ENSG00000089847.12	7.31434	-0.00605094	0.804409	-0.00752222	0.993998	0.999872	ENSG00000089847	ANKRD24
ENSG00000089876.12	32.9864	-0.392329	0.67556	-0.580747	0.561411	0.999872	ENSG00000089876	DHX32
ENSG00000089902.10	0.0427955	-0.630994	3.11466	-0.202589	0.839457	0.999872	ENSG00000089902	RCOR1
ENSG00000089916.18	37.3451	0.60047	0.53542	1.12149	0.262078	0.999872	ENSG00000089916	GPATCH2L
ENSG00000090006.18	303.533	0.0698605	0.184091	0.37949	0.704324	0.999872	ENSG00000090006	LTBP4
ENSG00000090013.11	588.928	0.114911	0.0907739	1.26591	0.205547	0.999872	ENSG00000090013	BLVRB
ENSG00000090020.11	137.439	-0.147718	0.239324	-0.617227	0.537085	0.999872	ENSG00000090020	SLC9A1
ENSG00000090054.15	391.859	0.0482233	0.138415	0.348397	0.727542	0.999872	ENSG00000090054	SPTLC1
ENSG00000090060.18	979.561	-0.0301626	0.109037	-0.276627	0.782067	0.999872	ENSG00000090060	PAPOLA
ENSG00000090061.17	191.134	-0.298559	0.338349	-0.882399	0.377561	0.999872	ENSG00000090061	CCNK
ENSG00000090097.22	206.385	-0.0669044	0.135495	-0.493778	0.621463	0.999872	ENSG00000090097	PCBP4
ENSG00000090104.12	0.882208	1.00402	3.05045	0.329139	0.742051	0.999872	ENSG00000090104	RGS1
ENSG00000090238.12	188.987	-0.172745	0.146652	-1.17793	0.238825	0.999872	ENSG00000090238	YPEL3
ENSG00000090263.16	162.021	0.173756	0.172049	1.00992	0.312533	0.999872	ENSG00000090263	MRPS33
ENSG00000090266.13	579.957	-0.064129	0.166134	-0.386007	0.699491	0.999872	ENSG00000090266	NDUFB2
ENSG00000090273.14	0.701035	-0.431106	2.48387	-0.173562	0.86221	0.999872	ENSG00000090273	NUDC
ENSG00000090316.16	267.166	0.0714277	0.150562	0.474408	0.635209	0.999872	ENSG00000090316	MAEA
ENSG00000090339.9	0.0617059	-0.597806	3.11098	-0.19216	0.847617	0.999872	ENSG00000090339	ICAM1
ENSG00000090372.15	0.417079	-0.612879	3.06935	-0.199677	0.841733	0.999872	ENSG00000090372	STRN4
ENSG00000090376.11	1.79498	-0.544131	1.72808	-0.314877	0.752855	0.999872	ENSG00000090376	IRAK3
ENSG00000090447.12	41.6998	-0.347643	0.355202	-0.978719	0.327719	0.999872	ENSG00000090447	TFAP4
ENSG00000090470.15	4.11168	1.32297	1.74466	0.758297	0.448273	0.999872	ENSG00000090470	PDCD7
ENSG00000090487.11	27.3464	0.0294466	0.396333	0.0742976	0.940774	0.999872	ENSG00000090487	SPG21
ENSG00000090512.12	206.59	-0.109337	0.26228	-0.416872	0.676772	0.999872	ENSG00000090512	FETUB
ENSG00000090520.11	726.32	0.0861571	0.10644	0.80944	0.418262	0.999872	ENSG00000090520	DNAJB11
ENSG00000090534.20	3.25864	1.38214	3.06014	0.451657	0.651516	0.999872	ENSG00000090534	THPO
ENSG00000090539.15	243.956	-0.0962737	0.174377	-0.5521	0.58088	0.999872	ENSG00000090539	CHRD
ENSG00000090554.13	37.7558	-0.645627	0.490852	-1.31532	0.188403	0.999872	ENSG00000090554	FLT3LG
ENSG00000090565.17	3.78049	0.188874	0.900357	0.209777	0.833842	0.999872	ENSG00000090565	RAB11FIP3
ENSG00000090581.10	10.5385	-0.087923	0.67403	-0.130444	0.896215	0.999872	ENSG00000090581	GNPTG
ENSG00000090612.22	1.01784	-1.55735	2.80494	-0.555215	0.578748	0.999872	ENSG00000090612	ZNF268
ENSG00000090615.15	2.72055	-0.82536	1.17344	-0.703369	0.481826	0.999872	ENSG00000090615	GOLGA3
ENSG00000090621.15	1974.75	-0.0948491	0.107547	-0.881933	0.377813	0.999872	ENSG00000090621	PABPC4
ENSG00000090661.12	25.2488	-0.0248112	0.382578	-0.0648526	0.948291	0.999872	ENSG00000090661	CERS4
ENSG00000090674.16	5.51579	0.675606	0.864522	0.78148	0.43452	0.999872	ENSG00000090674	MCOLN1
ENSG00000090686.16	286.863	-0.539571	0.177233	-3.04442	0.00233132	0.999872	ENSG00000090686	USP48
ENSG00000090857.14	0.108944	-0.20434	3.11322	-0.0656362	0.947667	0.999872	ENSG00000090857	PDPR
ENSG00000090863.12	382.258	0.0979736	0.124144	0.789196	0.429998	0.999872	ENSG00000090863	GLG1
ENSG00000090905.19	220.537	0.145045	0.153553	0.944591	0.344868	0.999872	ENSG00000090905	TNRC6A
ENSG00000090924.15	38.0665	0.965936	0.686434	1.40718	0.159374	0.999872	ENSG00000090924	PLEKHG2
ENSG00000090932.11	7.08309	0.0614794	0.635409	0.0967556	0.92292	0.999872	ENSG00000090932	DLL3
ENSG00000090971.5	67.5788	-0.305945	0.255622	-1.19686	0.23136	0.999872	ENSG00000090971	NAT14
ENSG00000090975.13	8.71527	1.21802	1.05924	1.1499	0.250185	0.999872	ENSG00000090975	PITPNM2
ENSG00000090989.18	106.486	0.0330023	0.209105	0.157826	0.874594	0.999872	ENSG00000090989	EXOC1
ENSG00000091039.17	224.094	0.138852	0.193687	0.716888	0.473444	0.999872	ENSG00000091039	OSBPL8
ENSG00000091073.19	234.73	-0.139737	0.168791	-0.827874	0.407742	0.999872	ENSG00000091073	DTX2
ENSG00000091106.19	11.1173	0.228956	0.719924	0.318029	0.750463	0.999872	ENSG00000091106	NLRC4
ENSG00000091127.14	66.9709	-0.145168	0.255119	-0.56902	0.569342	0.999872	ENSG00000091127	PUS7
ENSG00000091128.13	0.147297	-1.27493	3.09557	-0.411854	0.680446	0.999872	ENSG00000091128	LAMB4
ENSG00000091129.21	12.9778	0.0184496	0.589081	0.0313193	0.975015	0.999872	ENSG00000091129	NRCAM
ENSG00000091138.13	0.132296	0.466219	3.10577	0.150114	0.880675	0.999872	ENSG00000091138	SLC26A3
ENSG00000091140.14	0.806712	0.863522	3.05745	0.282432	0.777612	0.999872	ENSG00000091140	DLD
ENSG00000091157.14	2.95019	-0.070124	1.86656	-0.0375685	0.970032	0.999872	ENSG00000091157	WDR7
ENSG00000091164.13	57.6288	-0.287838	0.612883	-0.469645	0.638609	0.999872	ENSG00000091164	TXNL1
ENSG00000091181.20	1.431	0.806864	1.64985	0.489054	0.624803	0.999872	ENSG00000091181	IL5RA
ENSG00000091262.16	12.5221	-0.394534	0.842956	-0.468036	0.639759	0.999872	ENSG00000091262	ABCC6
ENSG00000091317.8	10.0966	-0.0703092	0.568026	-0.123778	0.901491	0.999872	ENSG00000091317	CMTM6
ENSG00000091409.15	1.52284	0.95737	1.75294	0.54615	0.584963	0.999872	ENSG00000091409	ITGA6
ENSG00000091428.18	48.1533	-0.100935	0.341164	-0.295855	0.767341	0.999872	ENSG00000091428	RAPGEF4
ENSG00000091436.17	446.09	-0.012525	0.128504	-0.0974679	0.922355	0.999872	ENSG00000091436	MAP3K20
ENSG00000091483.7	0.323768	-0.288014	3.09077	-0.0931851	0.925757	0.999872	ENSG00000091483	FH
ENSG00000091490.11	18.4269	0.723832	0.522243	1.386	0.165745	0.999872	ENSG00000091490	SEL1L3
ENSG00000091513.16	2364.48	0.0744824	0.144699	0.51474	0.606735	0.999872	ENSG00000091513	TF
ENSG00000091527.16	154.957	-0.340418	0.25176	-1.35215	0.176326	0.999872	ENSG00000091527	CDV3
ENSG00000091536.19	2.85607	-0.755395	1.24727	-0.60564	0.544754	0.999872	ENSG00000091536	MYO15A
ENSG00000091542.9	490.499	-0.0220944	0.102944	-0.214625	0.83006	0.999872	ENSG00000091542	ALKBH5
ENSG00000091583.11	566.089	-0.547111	1.25783	-0.434964	0.663589	0.999872	ENSG00000091583	APOH
ENSG00000091592.16	52.1488	-0.614228	0.349733	-1.75627	0.0790416	0.999872	ENSG00000091592	NLRP1
ENSG00000091622.16	21.5898	-0.784386	0.433531	-1.8093	0.0704049	0.999872	ENSG00000091622	PITPNM3
ENSG00000091640.8	299.865	0.0339959	0.181047	0.187774	0.851054	0.999872	ENSG00000091640	SPAG7
ENSG00000091651.9	11.695	0.906289	0.501534	1.80703	0.070757	0.999872	ENSG00000091651	ORC6
ENSG00000091656.19	8.51932	1.22966	0.900978	1.36481	0.172313	0.999872	ENSG00000091656	ZFHX4
ENSG00000091704.10	0.229387	-0.0280098	3.10222	-0.00902896	0.992796	0.999872	ENSG00000091704	CPA1
ENSG00000091831.24	65.1288	1.66133	0.651805	2.54882	0.0108089	0.999872	ENSG00000091831	ESR1
ENSG00000091844.8	19.0352	0.168053	0.435504	0.385883	0.699584	0.999872	ENSG00000091844	RGS17
ENSG00000091879.14	279.551	0.0953946	0.139118	0.685711	0.492895	0.999872	ENSG00000091879	ANGPT2
ENSG00000091947.10	123.303	-0.45581	0.264338	-1.72435	0.0846451	0.999872	ENSG00000091947	TMEM101
ENSG00000091972.18	53.9777	-0.0750971	0.267305	-0.280942	0.778755	0.999872	ENSG00000091972	CD200
ENSG00000091986.16	395.661	0.00310218	0.149212	0.0207904	0.983413	0.999872	ENSG00000091986	CCDC80
ENSG00000092009.10	0.213356	0.21174	3.0874	0.0685819	0.945322	0.999872	ENSG00000092009	CMA1
ENSG00000092010.15	259.072	0.526955	0.619736	0.85029	0.395164	0.999872	ENSG00000092010	PSME1
ENSG00000092020.10	193.351	-0.0905282	0.16498	-0.548724	0.583195	0.999872	ENSG00000092020	PPP2R3C
ENSG00000092036.18	78.8167	0.171416	0.240505	0.712732	0.476011	0.999872	ENSG00000092036	HAUS4
ENSG00000092051.17	2.27257	1.71454	1.23659	1.38651	0.165592	0.999872	ENSG00000092051	JPH4
ENSG00000092068.20	90.73	-0.200384	0.311724	-0.642825	0.520337	0.999872	ENSG00000092068	SLC7A8
ENSG00000092094.11	80.1514	0.303113	0.39606	0.765322	0.44408	0.999872	ENSG00000092094	OSGEP
ENSG00000092098.17	16.8156	0.831852	0.77825	1.06888	0.285126	0.999872	ENSG00000092098	RNF31
ENSG00000092108.22	21.2832	0.0211905	0.475412	0.044573	0.964448	0.999872	ENSG00000092108	SCFD1
ENSG00000092140.16	14.713	0.43702	0.493685	0.88522	0.376038	0.999872	ENSG00000092140	G2E3
ENSG00000092148.13	358.394	-0.000456209	0.128993	-0.0035367	0.997178	0.999872	ENSG00000092148	HECTD1
ENSG00000092199.18	2907.24	-0.0380026	0.0630356	-0.602875	0.546592	0.999872	ENSG00000092199	HNRNPC
ENSG00000092200.12	0.67984	-1.03435	2.98902	-0.346052	0.729304	0.999872	ENSG00000092200	RPGRIP1
ENSG00000092201.10	3.49026	0.974349	1.26385	0.770935	0.440745	0.999872	ENSG00000092201	SUPT16H
ENSG00000092203.15	109.405	-0.22071	0.195779	-1.12734	0.259599	0.999872	ENSG00000092203	TOX4
ENSG00000092208.17	35.6039	-0.275897	0.299033	-0.922631	0.3562	0.999872	ENSG00000092208	GEMIN2
ENSG00000092295.12	0.0899719	-1.01362	3.10181	-0.326784	0.743831	0.999872	ENSG00000092295	TGM1
ENSG00000092330.18	161.19	0.0224306	0.172963	0.129684	0.896816	0.999872	ENSG00000092330	TINF2
ENSG00000092377.15	0.374731	-0.791954	3.07523	-0.257527	0.796772	0.999872	ENSG00000092377	TBL1Y
ENSG00000092421.17	9.0822	0.970232	0.77148	1.25762	0.208527	0.999872	ENSG00000092421	SEMA6A
ENSG00000092439.16	132.526	-0.625522	0.421584	-1.48374	0.137877	0.999872	ENSG00000092439	TRPM7
ENSG00000092445.12	2.85495	-0.386344	1.09927	-0.351456	0.725246	0.999872	ENSG00000092445	TYRO3
ENSG00000092470.12	0.129524	-0.604481	3.11278	-0.194193	0.846024	0.999872	ENSG00000092470	WDR76
ENSG00000092529.25	27.1587	-0.671509	0.358832	-1.87137	0.0612932	0.999872	ENSG00000092529	CAPN3
ENSG00000092531.10	5.11229	0.269265	1.02796	0.261941	0.793367	0.999872	ENSG00000092531	SNAP23
ENSG00000092607.15	40.4634	0.111013	0.316634	0.350604	0.725886	0.999872	ENSG00000092607	TBX15
ENSG00000092621.13	10.8127	0.516959	0.642011	0.805219	0.420693	0.999872	ENSG00000092621	PHGDH
ENSG00000092758.18	9.92332	-0.251925	0.618064	-0.407604	0.683564	0.999872	ENSG00000092758	COL9A3
ENSG00000092820.18	791.995	0.0405639	0.086904	0.466767	0.640667	0.999872	ENSG00000092820	EZR
ENSG00000092841.19	2556.08	0.0811553	0.0676139	1.20028	0.230032	0.999872	ENSG00000092841	MYL6
ENSG00000092850.12	0.0457255	-0.577147	3.10685	-0.185766	0.852628	0.999872	ENSG00000092850	TEKT2
ENSG00000092853.14	17.2286	-0.267842	0.431924	-0.620113	0.535183	0.999872	ENSG00000092853	CLSPN
ENSG00000092871.17	197.617	-0.0957571	0.143656	-0.66657	0.505047	0.999872	ENSG00000092871	RFFL
ENSG00000092929.12	256.404	-0.314217	0.170425	-1.84373	0.065223	0.999872	ENSG00000092929	UNC13D
ENSG00000092931.11	93.3663	-0.0554452	0.220436	-0.251526	0.801408	0.999872	ENSG00000092931	MFSD11
ENSG00000092964.18	606.726	0.000908082	0.103157	0.00880293	0.992976	0.999872	ENSG00000092964	DPYSL2
ENSG00000092978.11	63.9985	0.179058	0.221249	0.809307	0.418339	0.999872	ENSG00000092978	GPATCH2
ENSG00000093000.19	3.32446	0.894994	0.94789	0.944197	0.345069	0.999872	ENSG00000093000	NUP50
ENSG00000093009.11	3.66096	-0.0500942	1.54199	-0.0324867	0.974084	0.999872	ENSG00000093009	CDC45
ENSG00000093010.15	1.5945	0.603132	1.48713	0.405568	0.68506	0.999872	ENSG00000093010	COMT
ENSG00000093072.18	64.7444	-0.189939	0.303448	-0.625936	0.531357	0.999872	ENSG00000093072	ADA2
ENSG00000093100.13	145.064	0.0113056	0.221035	0.0511484	0.959207	0.999872	ENSG00000093100
ENSG00000093134.15	26.5594	-0.417886	0.401126	-1.04178	0.297512	0.999872	ENSG00000093134	VNN3P
ENSG00000093144.19	5.90979	0.415742	1.00286	0.414556	0.678467	0.999872	ENSG00000093144	ECHDC1
ENSG00000093167.18	279.165	0.0357464	0.165314	0.216234	0.828805	0.999872	ENSG00000093167	LRRFIP2
ENSG00000093183.14	139.979	-0.294844	0.189418	-1.55658	0.11957	0.999872	ENSG00000093183	SEC22C
ENSG00000093217.11	41.0488	0.274494	0.330883	0.829582	0.406775	0.999872	ENSG00000093217	XYLB
ENSG00000094631.21	155.983	0.0920252	0.160995	0.571604	0.56759	0.999872	ENSG00000094631	HDAC6
ENSG00000094661.3	2.00777	-0.186035	1.35326	-0.137472	0.890657	0.999872	ENSG00000094661	OR1I1
ENSG00000094755.17	1.17769	0.25414	2.43177	0.104508	0.916766	0.999872	ENSG00000094755	GABRP
ENSG00000094804.12	0.621099	-0.0563239	3.06169	-0.0183963	0.985323	0.999872	ENSG00000094804	CDC6
ENSG00000094841.14	2.97906	-0.679718	3.07604	-0.220971	0.825115	0.999872	ENSG00000094841	UPRT
ENSG00000094880.11	8.36983	-0.220735	0.643848	-0.342837	0.731721	0.999872	ENSG00000094880	CDC23
ENSG00000094914.14	1.77349	-1.82288	1.5601	-1.16844	0.242629	0.999872	ENSG00000094914	AAAS
ENSG00000094916.16	42.6681	0.526465	0.372619	1.41288	0.157692	0.999872	ENSG00000094916	CBX5
ENSG00000094963.14	1.82423	-0.412048	3.08178	-0.133704	0.893636	0.999872	ENSG00000094963	FMO2
ENSG00000094975.14	178.011	-0.238329	0.246421	-0.967162	0.333463	0.999872	ENSG00000094975	SUCO
ENSG00000095002.15	0.665184	-0.13796	2.62114	-0.0526334	0.958024	0.999872	ENSG00000095002	MSH2
ENSG00000095015.6	153.481	-0.0461985	0.18782	-0.245972	0.805704	0.999872	ENSG00000095015	MAP3K1
ENSG00000095059.16	77.8635	0.148785	0.204618	0.727135	0.467144	0.999872	ENSG00000095059	DHPS
ENSG00000095066.12	61.0851	0.0461478	0.335383	0.137597	0.890559	0.999872	ENSG00000095066	HOOK2
ENSG00000095139.14	435.542	-0.217454	0.131349	-1.65555	0.0978136	0.999872	ENSG00000095139	ARCN1
ENSG00000095203.14	115.968	0.0584262	0.206564	0.282848	0.777294	0.999872	ENSG00000095203	EPB41L4B
ENSG00000095209.12	1.39204	-0.257914	1.6903	-0.152584	0.878726	0.999872	ENSG00000095209	TMEM38B
ENSG00000095261.14	1.39144	0.0432839	1.63387	0.0264917	0.978865	0.999872	ENSG00000095261	PSMD5
ENSG00000095303.17	95.2089	-0.0154184	0.221995	-0.0694538	0.944628	0.999872	ENSG00000095303	PTGS1
ENSG00000095319.14	202.582	0.0683777	0.131303	0.520763	0.602532	0.999872	ENSG00000095319	NUP188
ENSG00000095321.17	6.39174	0.180292	0.779142	0.231398	0.817006	0.999872	ENSG00000095321	CRAT
ENSG00000095370.20	291.944	-0.0378266	0.129245	-0.292673	0.769772	0.999872	ENSG00000095370	SH2D3C
ENSG00000095380.11	42.5173	-0.261236	0.315093	-0.829074	0.407062	0.999872	ENSG00000095380	NANS
ENSG00000095397.16	9.7574	-0.933318	0.941632	-0.991171	0.321602	0.999872	ENSG00000095397	WHRN
ENSG00000095485.18	45.8711	0.287284	0.356386	0.806102	0.420184	0.999872	ENSG00000095485	CWF19L1
ENSG00000095539.15	24.3173	-0.378883	0.515687	-0.734716	0.462513	0.999872	ENSG00000095539	SEMA4G
ENSG00000095564.14	0.761408	-1.02553	2.41385	-0.424854	0.670943	0.999872	ENSG00000095564	BTAF1
ENSG00000095585.17	31.8348	0.298001	0.349284	0.853178	0.393561	0.999872	ENSG00000095585	BLNK
ENSG00000095587.9	0.171182	-0.797438	3.08855	-0.258192	0.796259	0.999872	ENSG00000095587	TLL2
ENSG00000095627.9	9.69537	0.129216	0.668099	0.193409	0.846638	0.999872	ENSG00000095627	TDRD1
ENSG00000095637.22	100.861	0.0256033	0.25311	0.101155	0.919427	0.999872	ENSG00000095637	SORBS1
ENSG00000095713.14	2.38672	0.887306	1.31702	0.673724	0.500487	0.999872	ENSG00000095713	CRTAC1
ENSG00000095777.17	0.365461	-0.194174	3.06244	-0.0634049	0.949444	0.999872	ENSG00000095777	MYO3A
ENSG00000095787.23	719.292	0.0271846	0.132369	0.20537	0.837283	0.999872	ENSG00000095787	WAC
ENSG00000095794.19	150.932	0.0270407	0.15524	0.174186	0.861719	0.999872	ENSG00000095794	CREM
ENSG00000095906.17	3.52069	0.678929	0.978079	0.694145	0.487591	0.999872	ENSG00000095906	NUBP2
ENSG00000095951.17	14.7108	-0.470666	0.509773	-0.923285	0.355859	0.999872	ENSG00000095951	HIVEP1
ENSG00000095970.17	30.6627	0.273617	0.378438	0.723017	0.46967	0.999872	ENSG00000095970	TREM2
ENSG00000096060.15	899.749	-0.0743513	0.107422	-0.692139	0.48885	0.999872	ENSG00000096060	FKBP5
ENSG00000096063.16	0.859005	0.226838	2.07419	0.109362	0.912915	0.999872	ENSG00000096063	SRPK1
ENSG00000096070.19	70.372	0.157904	0.240356	0.656961	0.511206	0.999872	ENSG00000096070	BRPF3
ENSG00000096080.12	0.250639	1.28821	3.08393	0.417716	0.676155	0.999872	ENSG00000096080	MRPS18A
ENSG00000096088.16	0.204231	0.284341	3.09414	0.0918968	0.92678	0.999872	ENSG00000096088	PGC
ENSG00000096093.16	60.8399	-0.481423	0.243982	-1.97319	0.0484739	0.999872	ENSG00000096093	EFHC1
ENSG00000096384.20	7785.12	0.0291243	0.0515958	0.564469	0.572435	0.999872	ENSG00000096384	HSP90AB1
ENSG00000096433.11	72.9323	-0.213424	1.15334	-0.185048	0.853191	0.999872	ENSG00000096433	ITPR3
ENSG00000096654.15	14.8321	-0.430371	0.493678	-0.871765	0.383337	0.999872	ENSG00000096654	ZNF184
ENSG00000096696.14	1.55717	-2.09427	2.23185	-0.938359	0.34806	0.999872	ENSG00000096696	DSP
ENSG00000096717.12	69.8278	1.73319	1.14657	1.51163	0.130629	0.999872	ENSG00000096717	SIRT1
ENSG00000096746.17	644.484	-0.0119531	0.097501	-0.122595	0.902428	0.999872	ENSG00000096746	HNRNPH3
ENSG00000096872.17	4.77954	-0.104664	1.10971	-0.0943163	0.924858	0.999872	ENSG00000096872	IFT74
ENSG00000096996.16	5.73567	1.13102	0.845167	1.33823	0.180823	0.999872	ENSG00000096996	IL12RB1
ENSG00000097021.20	88.8782	0.219184	0.306472	0.715186	0.474494	0.999872	ENSG00000097021	ACOT7
ENSG00000097033.14	367.058	0.0231636	0.121276	0.190999	0.848526	0.999872	ENSG00000097033	SH3GLB1
ENSG00000097096.9	6.88851	0.0110163	0.948226	0.0116178	0.990731	0.999872	ENSG00000097096	SYDE2
ENSG00000099139.14	83.2826	-0.234376	0.342171	-0.684966	0.493366	0.999872	ENSG00000099139	PCSK5
ENSG00000099204.20	371.076	-0.26703	0.159793	-1.6711	0.0947024	0.999872	ENSG00000099204	ABLIM1
ENSG00000099219.14	80.2109	0.0564881	0.203713	0.277292	0.781556	0.999872	ENSG00000099219	ERMP1
ENSG00000099246.17	437.447	-0.396856	0.253708	-1.56422	0.117765	0.999872	ENSG00000099246	RAB18
ENSG00000099250.18	371.507	0.200389	0.253404	0.790786	0.429069	0.999872	ENSG00000099250	NRP1
ENSG00000099251.14	20.4427	-0.257089	0.419637	-0.612647	0.54011	0.999872	ENSG00000099251	HSD17B7P2
ENSG00000099256.19	1.40831	-0.378804	1.79027	-0.211591	0.832426	0.999872	ENSG00000099256	PRTFDC1
ENSG00000099260.11	2.5356	0.874623	1.27471	0.686133	0.49263	0.999872	ENSG00000099260	PALMD
ENSG00000099290.17	138.111	-0.136919	0.169855	-0.806095	0.420188	0.999872	ENSG00000099290	WASHC2A
ENSG00000099308.10	53.5347	0.154166	0.241938	0.637214	0.523986	0.999872	ENSG00000099308	MAST3
ENSG00000099326.9	67.4678	-0.049372	0.22365	-0.220755	0.825283	0.999872	ENSG00000099326	MZF1
ENSG00000099330.9	77.4303	-0.0500236	0.201792	-0.247897	0.804214	0.999872	ENSG00000099330	OCEL1
ENSG00000099331.13	341.13	0.429739	0.298611	1.43913	0.150115	0.999872	ENSG00000099331	MYO9B
ENSG00000099337.5	0.388573	-0.65474	3.08818	-0.212015	0.832095	0.999872	ENSG00000099337	KCNK6
ENSG00000099338.23	14.0289	1.56533	0.564319	2.77383	0.00554001	0.999872	ENSG00000099338	CATSPERG
ENSG00000099341.11	703.708	0.133941	0.09376	1.42855	0.153134	0.999872	ENSG00000099341	PSMD8
ENSG00000099364.18	12.0657	-0.389226	0.769219	-0.506001	0.612856	0.999872	ENSG00000099364	FBXL19
ENSG00000099365.11	1.01847	-1.36353	2.70295	-0.504461	0.613937	0.999872	ENSG00000099365	STX1B
ENSG00000099377.14	0.198882	-1.27143	3.09331	-0.411027	0.681053	0.999872	ENSG00000099377	HSD3B7
ENSG00000099381.18	0.0617059	-0.597806	3.11098	-0.19216	0.847617	0.999872	ENSG00000099381	SETD1A
ENSG00000099385.12	2.99715	-0.615243	0.997939	-0.616514	0.537556	0.999872	ENSG00000099385	BCL7C
ENSG00000099622.14	518.214	0.149695	0.14803	1.01125	0.311899	0.999872	ENSG00000099622	CIRBP
ENSG00000099624.8	200.063	0.152145	0.183484	0.829202	0.40699	0.999872	ENSG00000099624	ATP5F1D
ENSG00000099625.13	54.4185	0.134636	0.271166	0.496507	0.619537	0.999872	ENSG00000099625	CBARP
ENSG00000099715.14	7.74774	0.58479	0.652171	0.896681	0.369889	0.999872	ENSG00000099715	PCDH11Y
ENSG00000099725.14	57.7768	0.105436	0.369752	0.285154	0.775526	0.999872	ENSG00000099725	PRKY
ENSG00000099783.12	39.9885	1.40233	0.758544	1.84871	0.0644996	0.999872	ENSG00000099783	HNRNPM
ENSG00000099785.10	54.1279	-0.148565	0.243308	-0.610606	0.54146	0.999872	ENSG00000099785	MARCHF2
ENSG00000099797.15	179.104	0.133358	0.157505	0.846687	0.39717	0.999872	ENSG00000099797	TECR
ENSG00000099804.9	386.117	-0.00474778	0.158889	-0.0298811	0.976162	0.999872	ENSG00000099804	CDC34
ENSG00000099810.21	72.8526	0.187627	0.424287	0.442218	0.658331	0.999872	ENSG00000099810	MTAP
ENSG00000099814.16	19.1774	-0.885727	2.24502	-0.39453	0.693189	0.999872	ENSG00000099814	CEP170B
ENSG00000099817.12	1082.56	-0.0935785	0.0967584	-0.967136	0.333476	0.999872	ENSG00000099817	POLR2E
ENSG00000099821.14	84.5482	-0.0899692	0.204522	-0.439901	0.660009	0.999872	ENSG00000099821	POLRMT
ENSG00000099840.14	5.9527	0.191912	0.710796	0.269996	0.787164	0.999872	ENSG00000099840	IZUMO4
ENSG00000099849.15	270.053	0.0629775	0.156933	0.401302	0.688198	0.999872	ENSG00000099849	RASSF7
ENSG00000099860.9	11.3547	-0.75729	0.761552	-0.994403	0.320027	0.999872	ENSG00000099860	GADD45B
ENSG00000099864.18	97.5109	0.0199495	0.190368	0.104794	0.916539	0.999872	ENSG00000099864	PALM
ENSG00000099866.15	0.451753	0.610436	3.07014	0.19883	0.842396	0.999872	ENSG00000099866	MADCAM1
ENSG00000099869.8	5.35055	-0.31696	1.12447	-0.281876	0.778039	0.999872	ENSG00000099869	IGF2-AS
ENSG00000099875.15	934.314	-0.122657	0.085867	-1.42846	0.15316	0.999872	ENSG00000099875	MKNK2
ENSG00000099889.14	43.6004	-0.155719	0.33101	-0.470435	0.638044	0.999872	ENSG00000099889	ARVCF
ENSG00000099899.15	3.93139	-0.95709	1.75177	-0.546357	0.584821	0.999872	ENSG00000099899	TRMT2A
ENSG00000099901.17	954.789	-0.137275	0.121308	-1.13162	0.257793	0.999872	ENSG00000099901	RANBP1
ENSG00000099904.16	0.225527	-0.335887	3.09151	-0.108648	0.913482	0.999872	ENSG00000099904	ZDHHC8
ENSG00000099910.17	0.411352	0.481969	3.08281	0.156341	0.875765	0.999872	ENSG00000099910	KLHL22
ENSG00000099917.17	208.317	-0.0930742	0.13792	-0.674843	0.499775	0.999872	ENSG00000099917	MED15
ENSG00000099940.12	4.78176	0.314548	0.802277	0.392069	0.695007	0.999872	ENSG00000099940	SNAP29
ENSG00000099942.13	238.399	-0.0335766	0.138565	-0.242317	0.808535	0.999872	ENSG00000099942	CRKL
ENSG00000099949.21	2.89786	-0.364551	1.14104	-0.319489	0.749356	0.999872	ENSG00000099949	LZTR1
ENSG00000099953.10	11.5043	0.136317	0.506356	0.269212	0.787767	0.999872	ENSG00000099953	MMP11
ENSG00000099954.18	18.9487	-1.65875	0.508778	-3.26026	0.00111309	0.999872	ENSG00000099954	CECR2
ENSG00000099956.20	11.1315	-0.500973	0.642103	-0.780206	0.435269	0.999872	ENSG00000099956	SMARCB1
ENSG00000099957.16	1.41444	-2.19003	1.55371	-1.40955	0.158672	0.999872	ENSG00000099957	P2RX6
ENSG00000099958.15	49.0685	-0.193393	0.433408	-0.446216	0.655442	0.999872	ENSG00000099958	DERL3
ENSG00000099968.18	198.823	-0.110643	0.181655	-0.609081	0.542471	0.999872	ENSG00000099968	BCL2L13
ENSG00000099977.14	1975.71	0.145275	0.101077	1.43727	0.150641	0.999872	ENSG00000099977	DDT
ENSG00000099991.18	256.104	0.0167936	0.136543	0.122991	0.902114	0.999872	ENSG00000099991	CABIN1
ENSG00000099992.16	0.617504	-0.0608808	3.06504	-0.019863	0.984153	0.999872	ENSG00000099992	TBC1D10A
ENSG00000099998.18	162.571	-0.0288452	0.142255	-0.20277	0.839315	0.999872	ENSG00000099998	GGT5
ENSG00000099999.15	8.48322	0.677125	0.641765	1.0551	0.291381	0.999872	ENSG00000099999	RNF215
ENSG00000100003.18	8.2615	0.95805	1.21542	0.788248	0.430552	0.999872	ENSG00000100003	SEC14L2
ENSG00000100012.12	1.10236	-0.982203	2.13288	-0.460506	0.645153	0.999872	ENSG00000100012	SEC14L3
ENSG00000100014.20	6.32899	-0.677903	3.03642	-0.223257	0.823336	0.999872	ENSG00000100014	SPECC1L
ENSG00000100023.19	101.522	-0.20994	0.216599	-0.969255	0.332418	0.999872	ENSG00000100023	PPIL2
ENSG00000100024.15	102.175	-0.063895	0.299975	-0.213001	0.831326	0.999872	ENSG00000100024	UPB1
ENSG00000100029.18	35.1666	0.854116	0.460068	1.8565	0.0633826	0.999872	ENSG00000100029	PES1
ENSG00000100030.15	24.1872	0.313891	0.408537	0.768329	0.442292	0.999872	ENSG00000100030	MAPK1
ENSG00000100031.19	89.1398	0.252419	0.245065	1.03001	0.303007	0.999872	ENSG00000100031	GGT1
ENSG00000100033.16	4.36244	-0.539138	1.23185	-0.437663	0.66163	0.999872	ENSG00000100033	PRODH
ENSG00000100034.14	3.4039	1.09686	1.1464	0.956783	0.338677	0.999872	ENSG00000100034	PPM1F
ENSG00000100036.13	1.44403	0.685863	2.62093	0.261686	0.793563	0.999872	ENSG00000100036	SLC35E4
ENSG00000100038.20	0.569147	1.89791	3.05504	0.621238	0.534443	0.999872	ENSG00000100038	TOP3B
ENSG00000100055.21	20.0388	-0.0659895	0.407934	-0.161765	0.871491	0.999872	ENSG00000100055	CYTH4
ENSG00000100056.12	0.306347	0.296789	3.08774	0.0961186	0.923426	0.999872	ENSG00000100056	ESS2
ENSG00000100058.12	31.1572	-0.0224688	0.408428	-0.0550129	0.956128	0.999872	ENSG00000100058	CRYBB2P1
ENSG00000100060.18	127.74	0.422776	0.317353	1.33219	0.182797	0.999872	ENSG00000100060	MFNG
ENSG00000100065.15	160.932	0.262556	0.180629	1.45357	0.146066	0.999872	ENSG00000100065	CARD10
ENSG00000100068.13	31.8307	-0.415857	0.379352	-1.09623	0.272977	0.999872	ENSG00000100068	LRP5L
ENSG00000100083.19	316.49	-0.00530132	0.151352	-0.0350265	0.972059	0.999872	ENSG00000100083	GGA1
ENSG00000100084.14	106.163	0.000173322	0.183811	0.000942938	0.999248	0.999872	ENSG00000100084	HIRA
ENSG00000100092.24	0.633113	-2.38462	3.06738	-0.777413	0.436915	0.999872	ENSG00000100092	SH3BP1
ENSG00000100095.19	0.275119	1.27855	3.08537	0.414393	0.678586	0.999872	ENSG00000100095	SEZ6L
ENSG00000100099.21	44.2775	0.763852	0.297354	2.56883	0.0102043	0.999872	ENSG00000100099	HPS4
ENSG00000100100.13	6.30877	1.68671	1.35762	1.2424	0.214088	0.999872	ENSG00000100100	PIK3IP1
ENSG00000100101.15	7.4874	0.607429	0.698402	0.86974	0.384442	0.999872	ENSG00000100101
ENSG00000100104.13	109.122	-0.0486324	0.203138	-0.239406	0.810791	0.999872	ENSG00000100104	SRRD
ENSG00000100105.18	65.7649	0.0926609	0.263364	0.351836	0.724961	0.999872	ENSG00000100105	PATZ1
ENSG00000100106.22	866.055	-0.0171893	0.0846888	-0.20297	0.839159	0.999872	ENSG00000100106	TRIOBP
ENSG00000100109.17	67.7173	-0.499818	1.04487	-0.478356	0.632397	0.999872	ENSG00000100109	TFIP11
ENSG00000100116.17	0.795875	1.53568	2.39838	0.6403	0.521977	0.999872	ENSG00000100116	GCAT
ENSG00000100122.7	3.67203	-0.120606	1.12233	-0.10746	0.914424	0.999872	ENSG00000100122	CRYBB1
ENSG00000100124.15	19.601	0.0617471	0.398339	0.155012	0.876812	0.999872	ENSG00000100124	ANKRD54
ENSG00000100129.18	1014.23	-0.227928	0.267671	-0.851522	0.394479	0.999872	ENSG00000100129	EIF3L
ENSG00000100138.15	187.707	0.155953	0.315215	0.494752	0.620775	0.999872	ENSG00000100138	SNU13
ENSG00000100139.13	161.354	-0.00925198	0.155773	-0.059394	0.952638	0.999872	ENSG00000100139	MICALL1
ENSG00000100142.16	21.953	-0.659896	0.711222	-0.927834	0.353493	0.999872	ENSG00000100142	POLR2F
ENSG00000100146.18	4.2761	0.194008	1.00646	0.192762	0.847145	0.999872	ENSG00000100146	SOX10
ENSG00000100150.20	35.5129	-0.028138	0.323234	-0.0870514	0.930631	0.999872	ENSG00000100150	DEPDC5
ENSG00000100154.14	70.1737	0.000654693	0.257174	0.00254572	0.997969	0.999872	ENSG00000100154	TTC28
ENSG00000100156.10	0.763947	-0.05955	2.55351	-0.0233208	0.981394	0.999872	ENSG00000100156	SLC16A8
ENSG00000100162.15	0.846341	0.343542	3.06448	0.112104	0.910741	0.999872	ENSG00000100162	CENPM
ENSG00000100167.20	1.66337	1.44499	1.36796	1.05631	0.290827	0.999872	ENSG00000100167	SEPTIN3
ENSG00000100181.22	5.62437	-0.602568	0.957839	-0.629092	0.529289	0.999872	ENSG00000100181	TPTEP1
ENSG00000100196.11	0.634606	-0.852497	2.60035	-0.327839	0.743033	0.999872	ENSG00000100196	KDELR3
ENSG00000100197.22	70.7973	0.254689	0.292488	0.870766	0.383882	0.999872	ENSG00000100197	CYP2D6
ENSG00000100201.23	20.0232	-0.170441	0.590632	-0.288574	0.772907	0.999872	ENSG00000100201	DDX17
ENSG00000100206.10	2.83375	-3.2295	1.39176	-2.32044	0.020317	0.999872	ENSG00000100206	DMC1
ENSG00000100209.11	37.8012	0.225272	0.308937	0.729182	0.46589	0.999872	ENSG00000100209	HSCB
ENSG00000100211.10	233.517	-0.0570037	0.181127	-0.314717	0.752977	0.999872	ENSG00000100211	CBY1
ENSG00000100219.16	1221.53	0.127185	0.0965897	1.31675	0.187922	0.999872	ENSG00000100219	XBP1
ENSG00000100220.12	0.280008	-1.33002	3.07498	-0.43253	0.665356	0.999872	ENSG00000100220	RTCB
ENSG00000100221.10	472.597	-0.0268189	0.110737	-0.242186	0.808636	0.999872	ENSG00000100221	JOSD1
ENSG00000100225.18	316.843	0.128717	0.144502	0.890762	0.373057	0.999872	ENSG00000100225	FBXO7
ENSG00000100226.16	0.392101	-0.375114	3.07157	-0.122125	0.9028	0.999872	ENSG00000100226	GTPBP1
ENSG00000100227.18	156.686	0.187152	0.174282	1.07384	0.282892	0.999872	ENSG00000100227	POLDIP3
ENSG00000100228.12	17.3565	-0.0315966	0.506852	-0.0623389	0.950293	0.999872	ENSG00000100228	RAB36
ENSG00000100239.16	8.81535	-0.188952	0.571651	-0.330538	0.740994	0.999872	ENSG00000100239	PPP6R2
ENSG00000100241.21	0.0587645	0.288426	3.11445	0.0926088	0.926214	0.999872	ENSG00000100241	SBF1
ENSG00000100242.15	1133.69	0.0423563	0.0863377	0.490588	0.623718	0.999872	ENSG00000100242	SUN2
ENSG00000100243.21	2395.98	-0.0398765	0.0721865	-0.55241	0.580668	0.999872	ENSG00000100243	CYB5R3
ENSG00000100246.13	0.132296	0.466219	3.10577	0.150114	0.880675	0.999872	ENSG00000100246	DNAL4
ENSG00000100253.13	1.16196	-0.805718	2.17896	-0.369772	0.711552	0.999872	ENSG00000100253	MIOX
ENSG00000100258.18	0.125694	-0.572717	3.08729	-0.185508	0.85283	0.999872	ENSG00000100258	LMF2
ENSG00000100263.14	0.756992	-0.657527	3.0061	-0.218731	0.82686	0.999872	ENSG00000100263	RHBDD3
ENSG00000100266.19	495.513	-0.0192587	0.146075	-0.131841	0.89511	0.999872	ENSG00000100266	PACSIN2
ENSG00000100280.16	709.809	0.0285243	0.139897	0.203894	0.838436	0.999872	ENSG00000100280	AP1B1
ENSG00000100281.14	156.724	0.0279305	0.196985	0.14179	0.887246	0.999872	ENSG00000100281	HMGXB4
ENSG00000100284.21	0.934907	0.94823	2.76868	0.342484	0.731986	0.999872	ENSG00000100284	TOM1
ENSG00000100288.20	0.085591	-0.764333	3.10125	-0.246459	0.805327	0.999872	ENSG00000100288	CHKB
ENSG00000100292.18	2.21788	-1.29527	1.74851	-0.740784	0.458824	0.999872	ENSG00000100292	HMOX1
ENSG00000100294.13	0.218045	-1.46931	3.09673	-0.474473	0.635163	0.999872	ENSG00000100294	MCAT
ENSG00000100296.14	55.8505	0.520646	0.283606	1.83581	0.0663857	0.999872	ENSG00000100296	THOC5
ENSG00000100297.16	1.05057	-0.0382178	2.2876	-0.0167065	0.986671	0.999872	ENSG00000100297	MCM5
ENSG00000100298.16	0.777377	-1.21492	3.05221	-0.398047	0.690595	0.999872	ENSG00000100298	APOBEC3H
ENSG00000100299.18	84.9469	-0.165505	0.26793	-0.617717	0.536762	0.999872	ENSG00000100299	ARSA
ENSG00000100300.18	958.74	-0.0431051	0.0805542	-0.535107	0.592576	0.999872	ENSG00000100300	TSPO
ENSG00000100304.13	273.229	0.0977304	0.144866	0.674627	0.499913	0.999872	ENSG00000100304	TTLL12
ENSG00000100307.13	8.07015	-0.303787	0.942215	-0.322418	0.747136	0.999872	ENSG00000100307	CBX7
ENSG00000100316.16	3861.11	0.113697	0.0889097	1.27879	0.200969	0.999872	ENSG00000100316	RPL3
ENSG00000100319.13	0.985599	0.0701356	2.70807	0.0258987	0.979338	0.999872	ENSG00000100319	ZMAT5
ENSG00000100320.23	354.148	-0.0103832	0.145414	-0.0714046	0.943076	0.999872	ENSG00000100320	RBFOX2
ENSG00000100321.15	21.7174	-0.274813	0.417999	-0.65745	0.510891	0.999872	ENSG00000100321	SYNGR1
ENSG00000100324.14	1.15422	-0.204073	2.2792	-0.0895375	0.928655	0.999872	ENSG00000100324	TAB1
ENSG00000100325.15	358.344	-0.019156	0.110836	-0.172832	0.862783	0.999872	ENSG00000100325	ASCC2
ENSG00000100330.16	133.322	-0.364449	0.187052	-1.94838	0.0513697	0.999872	ENSG00000100330	MTMR3
ENSG00000100335.15	0.0617059	-0.597806	3.11098	-0.19216	0.847617	0.999872	ENSG00000100335	MIEF1
ENSG00000100336.17	12.5302	0.006456	0.687337	0.00939277	0.992506	0.999872	ENSG00000100336	APOL4
ENSG00000100342.21	2585.35	0.0839175	0.130233	0.644365	0.519339	0.999872	ENSG00000100342	APOL1
ENSG00000100344.11	0.0457255	-0.577147	3.10685	-0.185766	0.852628	0.999872	ENSG00000100344	PNPLA3
ENSG00000100345.22	2.92864	0.429159	1.09886	0.390549	0.69613	0.999872	ENSG00000100345	MYH9
ENSG00000100346.18	0.102116	0.249189	3.11175	0.0800799	0.936174	0.999872	ENSG00000100346	CACNA1I
ENSG00000100347.15	12.4851	-0.348285	1.4329	-0.243063	0.807957	0.999872	ENSG00000100347	SAMM50
ENSG00000100348.10	121.709	0.393915	0.243431	1.61818	0.105624	0.999872	ENSG00000100348	TXN2
ENSG00000100351.17	1.19642	-0.0826227	1.45823	-0.0566595	0.954816	0.999872	ENSG00000100351	GRAP2
ENSG00000100353.18	289.65	-0.0549949	0.132741	-0.414302	0.678653	0.999872	ENSG00000100353	EIF3D
ENSG00000100354.21	443.823	0.00419679	0.136245	0.0308033	0.975426	0.999872	ENSG00000100354	TNRC6B
ENSG00000100359.21	2.76775	-1.53257	1.73039	-0.885679	0.375791	0.999872	ENSG00000100359	SGSM3
ENSG00000100360.15	55.3869	-0.305277	0.370635	-0.823659	0.410133	0.999872	ENSG00000100360	IFT27
ENSG00000100364.19	0.458365	-0.882902	3.081	-0.286563	0.774447	0.999872	ENSG00000100364	KIAA0930
ENSG00000100368.14	0.912115	-0.404429	3.0893	-0.130913	0.895844	0.999872	ENSG00000100368	CSF2RB
ENSG00000100372.15	118.7	-0.1722	0.173656	-0.991613	0.321386	0.999872	ENSG00000100372	SLC25A17
ENSG00000100376.12	95.1653	0.0744785	0.333539	0.223298	0.823304	0.999872	ENSG00000100376	FAM118A
ENSG00000100379.17	65.6758	0.0427859	0.256624	0.166726	0.867586	0.999872	ENSG00000100379	KCTD17
ENSG00000100380.14	5.74736	1.05049	0.823871	1.27507	0.202284	0.999872	ENSG00000100380	ST13
ENSG00000100387.9	2.74906	-0.604264	1.48579	-0.406696	0.684231	0.999872	ENSG00000100387	RBX1
ENSG00000100393.14	14.4118	0.454939	0.502677	0.905032	0.365448	0.999872	ENSG00000100393	EP300
ENSG00000100395.15	5.48612	0.449138	1.10065	0.408066	0.683226	0.999872	ENSG00000100395	L3MBTL2
ENSG00000100399.16	0.874964	-2.28489	2.74784	-0.831521	0.405679	0.999872	ENSG00000100399	CHADL
ENSG00000100401.20	10.8696	0.963208	1.05103	0.916443	0.359435	0.999872	ENSG00000100401	RANGAP1
ENSG00000100403.12	4.37878	-0.67389	0.96566	-0.697854	0.485268	0.999872	ENSG00000100403	ZC3H7B
ENSG00000100412.17	3.20867	1.08468	1.17474	0.92334	0.35583	0.999872	ENSG00000100412	ACO2
ENSG00000100413.17	645.789	-0.0735427	0.114747	-0.64091	0.521581	0.999872	ENSG00000100413	POLR3H
ENSG00000100416.15	71.7926	-0.0128402	0.212977	-0.0602888	0.951926	0.999872	ENSG00000100416	TRMU
ENSG00000100417.12	0.543107	-0.279374	3.07684	-0.090799	0.927652	0.999872	ENSG00000100417	PMM1
ENSG00000100418.8	0.546663	-0.639541	3.08126	-0.207559	0.835574	0.999872	ENSG00000100418	DESI1
ENSG00000100422.14	2.07012	0.480877	1.72492	0.278782	0.780412	0.999872	ENSG00000100422	CERK
ENSG00000100425.18	60.1801	-0.125013	0.243839	-0.512686	0.608171	0.999872	ENSG00000100425	BRD1
ENSG00000100427.16	1.8184	-1.05359	1.69143	-0.622897	0.533352	0.999872	ENSG00000100427	MLC1
ENSG00000100429.18	46.4944	-0.215228	0.295215	-0.729056	0.465968	0.999872	ENSG00000100429	HDAC10
ENSG00000100433.16	0.355309	0.174185	3.06518	0.0568269	0.954683	0.999872	ENSG00000100433	KCNK10
ENSG00000100439.10	191.729	0.34229	0.185673	1.84352	0.0652537	0.999872	ENSG00000100439	ABHD4
ENSG00000100441.10	439.801	0.0768076	0.110518	0.694981	0.487067	0.999872	ENSG00000100441	KHNYN
ENSG00000100442.11	0.852593	0.334266	2.45427	0.136197	0.891665	0.999872	ENSG00000100442	FKBP3
ENSG00000100445.17	40.409	-0.00726263	0.34994	-0.0207539	0.983442	0.999872	ENSG00000100445	SDR39U1
ENSG00000100448.4	5.57058	0.0431199	1.02634	0.0420133	0.966488	0.999872	ENSG00000100448	CTSG
ENSG00000100450.13	0.225242	-1.39397	3.09206	-0.450824	0.652117	0.999872	ENSG00000100450	GZMH
ENSG00000100453.13	18.2058	0.586506	0.478294	1.22625	0.220106	0.999872	ENSG00000100453	GZMB
ENSG00000100461.18	166.831	0.847501	0.435294	1.94696	0.0515395	0.999872	ENSG00000100461	RBM23
ENSG00000100462.16	18.9104	1.52048	0.743428	2.04523	0.0408323	0.999872	ENSG00000100462	PRMT5
ENSG00000100473.18	2.84289	0.419892	1.22551	0.342627	0.731879	0.999872	ENSG00000100473	COCH
ENSG00000100478.15	14.4088	1.18141	0.592457	1.99408	0.0461433	0.999872	ENSG00000100478	AP4S1
ENSG00000100479.13	9.29255	-0.333462	0.71144	-0.468715	0.639274	0.999872	ENSG00000100479	POLE2
ENSG00000100483.14	31.2326	0.119215	0.350119	0.340498	0.733481	0.999872	ENSG00000100483	VCPKMT
ENSG00000100485.12	4.99291	0.866253	0.983606	0.880691	0.378485	0.999872	ENSG00000100485	SOS2
ENSG00000100490.9	5.79224	-1.04592	0.991956	-1.05441	0.291697	0.999872	ENSG00000100490	CDKL1
ENSG00000100503.26	13.2914	0.196734	0.630577	0.311991	0.755048	0.999872	ENSG00000100503	NIN
ENSG00000100504.17	207.292	0.0730744	0.16979	0.430381	0.666919	0.999872	ENSG00000100504	PYGL
ENSG00000100505.13	13.8234	0.34036	0.526663	0.646257	0.518113	0.999872	ENSG00000100505	TRIM9
ENSG00000100519.12	18.6827	0.367393	0.431074	0.852274	0.394062	0.999872	ENSG00000100519	PSMC6
ENSG00000100522.10	0.924735	-2.00799	3.07117	-0.653819	0.513229	0.999872	ENSG00000100522	GNPNAT1
ENSG00000100523.16	77.6482	-0.125081	0.304817	-0.410347	0.681552	0.999872	ENSG00000100523	DDHD1
ENSG00000100526.20	5.89769	0.486871	0.961158	0.506547	0.612473	0.999872	ENSG00000100526	CDKN3
ENSG00000100528.12	0.0457255	-0.577147	3.10685	-0.185766	0.852628	0.999872	ENSG00000100528	CNIH1
ENSG00000100532.12	1.68984	0.63845	3.04711	0.209527	0.834037	0.999872	ENSG00000100532	CGRRF1
ENSG00000100554.12	203.949	-0.0416626	0.137423	-0.303172	0.761759	0.999872	ENSG00000100554	ATP6V1D
ENSG00000100557.10	9.38829	0.472153	0.594141	0.794682	0.426799	0.999872	ENSG00000100557	CCDC198
ENSG00000100558.9	111.82	0.145785	0.214289	0.680322	0.496301	0.999872	ENSG00000100558	PLEK2
ENSG00000100564.9	1.93388	-3.1011	1.71649	-1.80666	0.0708157	0.999872	ENSG00000100564	PIGH
ENSG00000100567.13	609.633	-0.0747702	0.119122	-0.62768	0.530214	0.999872	ENSG00000100567	PSMA3
ENSG00000100568.11	6.83845	-2.11848	1.19352	-1.77499	0.0758995	0.999872	ENSG00000100568	VTI1B
ENSG00000100575.14	0.214528	0.564474	3.10169	0.181989	0.855591	0.999872	ENSG00000100575	TIMM9
ENSG00000100577.19	17.2234	0.760972	0.725858	1.04838	0.294466	0.999872	ENSG00000100577	GSTZ1
ENSG00000100578.18	36.1711	0.0678128	0.3943	0.171983	0.863451	0.999872	ENSG00000100578	KIAA0586
ENSG00000100583.4	1.80287	0.511469	1.28757	0.397237	0.691193	0.999872	ENSG00000100583	SAMD15
ENSG00000100591.8	839.232	0.0763684	0.0843414	0.905468	0.365218	0.999872	ENSG00000100591	AHSA1
ENSG00000100592.16	311.831	-0.0479893	0.138929	-0.345424	0.729776	0.999872	ENSG00000100592	DAAM1
ENSG00000100593.18	0.502707	0.321513	3.0906	0.104029	0.917146	0.999872	ENSG00000100593	ISM2
ENSG00000100596.7	0.676113	0.453001	3.07797	0.147175	0.882994	0.999872	ENSG00000100596	SPTLC2
ENSG00000100599.16	8.9803	0.226875	0.979033	0.231734	0.816745	0.999872	ENSG00000100599	RIN3
ENSG00000100600.15	534.14	-0.234791	0.28341	-0.828449	0.407417	0.999872	ENSG00000100600	LGMN
ENSG00000100601.10	0.564477	0.504246	3.06298	0.164626	0.869238	0.999872	ENSG00000100601	ALKBH1
ENSG00000100603.14	9.2198	-0.860232	3.00282	-0.286475	0.774514	0.999872	ENSG00000100603	SNW1
ENSG00000100605.17	37.4317	1.069	2.95836	0.361349	0.717839	0.999872	ENSG00000100605	ITPK1
ENSG00000100612.14	383.927	-0.118263	0.101962	-1.15987	0.246103	0.999872	ENSG00000100612	DHRS7
ENSG00000100614.18	20.0449	0.64671	0.488035	1.32513	0.185128	0.999872	ENSG00000100614	PPM1A
ENSG00000100625.9	0.129524	-0.604481	3.11278	-0.194193	0.846024	0.999872	ENSG00000100625	SIX4
ENSG00000100626.17	13.3149	-0.0379986	0.471858	-0.0805296	0.935816	0.999872	ENSG00000100626	GALNT16
ENSG00000100628.12	0.158421	0.919201	3.09718	0.296786	0.76663	0.999872	ENSG00000100628	ASB2
ENSG00000100629.17	9.84983	0.248684	0.801457	0.31029	0.75634	0.999872	ENSG00000100629	CEP128
ENSG00000100644.17	788.725	-0.147219	0.13125	-1.12167	0.262002	0.999872	ENSG00000100644	HIF1A
ENSG00000100647.8	0.445684	0.506634	3.07771	0.164614	0.869248	0.999872	ENSG00000100647	SUSD6
ENSG00000100650.16	592.42	-0.0459117	0.122341	-0.375276	0.707455	0.999872	ENSG00000100650	SRSF5
ENSG00000100664.11	1020.37	0.0225766	0.133686	0.168878	0.865892	0.999872	ENSG00000100664	EIF5
ENSG00000100665.12	354.073	0.10317	0.158308	0.651703	0.514593	0.999872	ENSG00000100665	SERPINA4
ENSG00000100678.19	1.83877	1.65601	2.29932	0.720218	0.471391	0.999872	ENSG00000100678	SLC8A3
ENSG00000100697.15	6.99958	-1.55572	1.26332	-1.23145	0.218153	0.999872	ENSG00000100697	DICER1
ENSG00000100711.14	35.9557	0.00329802	0.436572	0.00755434	0.993973	0.999872	ENSG00000100711	ZFYVE21
ENSG00000100714.17	50.0979	0.112417	0.260353	0.431788	0.665896	0.999872	ENSG00000100714	MTHFD1
ENSG00000100721.11	1.29249	-2.10503	2.29076	-0.91892	0.358137	0.999872	ENSG00000100721	TCL1A
ENSG00000100722.20	109.098	-0.128584	0.220843	-0.58224	0.560405	0.999872	ENSG00000100722	ZC3H14
ENSG00000100726.15	69.4704	0.00127368	0.220055	0.00578804	0.995382	0.999872	ENSG00000100726	TELO2
[truncated: 25,090 more rows]
